# Supplementary material for: Copper catalysed oxidative α-sulfonylation of branched aldehydes using the acid enhanced reactivity of manganese(iv) oxide
Source: Royal Society of Chemistry journal article supplement (doi:10.1039/d0cc01576h), 2020-01-01
Supplement: d0cc01576h1.pdf [file d0cc01576h1.pdf]

## **SUPPORTING INFORMATION**

### **Copper Catalysed Oxidative Sulfonylation of Branched Aldehydes Using the Acid Enhanced Reactivity of Manganese(IV) oxide.**

**Joe I. Higham and James A. Bull\***

Department of Chemistry, Imperial College London, Molecular Science Research Hub, White City Campus,  
Wood Lane, London, W12 0BZ, UK

\*E-mail: [j.bull@imperial.ac.uk](mailto:j.bull@imperial.ac.uk)

|                                                                                          |     |
|------------------------------------------------------------------------------------------|-----|
| Table of Contents .....                                                                  | S2  |
| General Experimental Considerations.....                                                 | S3  |
| Optimisation of Reaction Conditions for Silver-Mediated Oxidative Coupling Reaction..... | S4  |
| Investigation Into Acid Tuneable Oxidants .....                                          | S9  |
| Synthesis of Sulfinic Salts.....                                                         | S10 |
| Manganese(IV) Oxide Mediated $\alpha$ -Sulfonylation .....                               | S15 |
| Reaction Scope Varying the Sulfinic Salt .....                                           | S15 |
| Reaction Scope Varying the Aldehyde .....                                                | S20 |
| Derivatisation of Sulfonyl Aldehydes.....                                                | S28 |
| Gram Scale Synthesis.....                                                                | S29 |
| $^1\text{H}$ and $^{13}\text{C}$ NMR spectra for selected compounds.....                 | S30 |
| References .....                                                                         | S92 |

### General Experimental Considerations

All reactions were run under an inert atmosphere (argon) with flame-dried glassware using standard techniques unless otherwise stated. Anhydrous solvents were obtained by filtration through drying columns (THF, diethyl ether, CH<sub>2</sub>Cl<sub>2</sub>). Acetic acid, copper(II) triflate (98% purity), manganese(IV) oxide (>99% purity) and bathophenanthroline (>99% purity) were purchased from Sigma Aldrich and used as provided. Commercial aldehydes were distilled. All other commercial reagents were used as supplied or purified by standard techniques where necessary.

All  $\alpha$ -sulfonylation reactions were performed in microwave vials under air and sealed with Fisherbrand 20 mm aluminium, plain, centre hole, molded septa butyl, dark grey, 55° shore A, 3.0 mm caps when using polar solvents (AcOH, H<sub>2</sub>O or Ethanol).

Flash column chromatography was performed using 230-400 mesh silica with the indicated solvent system according to standard techniques. Analytical thin-layer chromatography (TLC) was performed on precoated, glass-backed silica gel plates. Visualisation of the developed chromatogram was performed by UV absorbance (254 nm), aqueous potassium permanganate, *p*-anisaldehyde, phosphomolybdic acid or vanillin stains. Infrared spectra ( $\nu_{\max}$ , FTIR ATR) were recorded in reciprocal centimeters (cm<sup>-1</sup>). Nuclear magnetic resonance spectra were recorded on 400 MHz spectrometers. Chemical shifts for <sup>1</sup>H NMR spectra are recorded in parts per million from tetramethylsilane with the solvent resonance as the internal standard (chloroform  $\delta$  = 7.27 ppm, or methanol  $\delta$  = 3.31 ppm). Data is reported as follows: chemical shift [multiplicity (s = singlet, d = doublet, t = triplet, q = quartet, m = multiplet and b = broad), coupling constant in Hz, integration, assignment]. <sup>13</sup>C NMR spectra were recorded with complete proton decoupling. Chemical shifts are reported in parts per million from tetramethylsilane with the solvent resonance as the internal standard (chloroform:  $\delta$  = 77.0 ppm, methanol  $\delta$  = 49.0 ppm). *J* values are reported in Hz. Assignments of <sup>1</sup>H/<sup>13</sup>C spectra were made by the analysis of  $\delta$ /*J* values, and COSY, HSQC, and HMBC experiments as appropriate. In cases where novel compounds are isolated as a mixture of diastereomers, both diastereomers were assigned in a single multiplet report with H<sub>a</sub>/H<sub>b</sub> and C<sub>a</sub>/C<sub>b</sub> being used to denote the proton and carbons of the two diastereomers respectively. In the case when known compounds are isolated as a mixture of diastereomers, *cis*- and *trans*-diastereomers are assigned in separate multiplet reports. <sup>19</sup>F NMR spectra were recorded with or without complete proton decoupling. Decoupling is indicated as (<sup>19</sup>F{<sup>1</sup>H}) and where relevant this is stated in each assignment and spectrum. <sup>19</sup>F spectra are indirectly referenced to CFCl<sub>3</sub>, automatically via direct measurement of the absolute frequency of the deuterium lock signal by the spectrometer hardware.

Melting points are uncorrected.

The high-resolution mass spectrometry (HRMS) analyses were performed using electrospray ion source (ESI) or pneumatically assisted atmospheric pressure chemical ionization (APCI) using an atmospheric solids analysis probe (ASAP). ESI was performed using a Waters LCT Premier equipped with an ESI source operated in positive or negative ion mode. The software used was MassLynx 4.1, this software does not account for the electron and all the calibrations/references are calculated accordingly, i.e. [M+H]<sup>+</sup> is detected and the mass is calibrated to output [M+H]. APCI was performed using an Orbitrap XL or Xevo G2S using an ASAP to insert samples into the APCI source. The sample was introduced at ambient temperature and the temperature increased until the sample vaporised.

All raw and processed data for this manuscript can be found at the Imperial College London Research Data Repository:

<https://doi.org/10.14469/hpc/6794>

## Optimisation of Reaction Conditions for Silver-Mediated Oxidative Coupling Reaction

### Catalyst Screening.

Various copper salts were investigated (Table S1, Entries 1–5). Copper(II) triflate was identified as the most effective under catalytic conditions. Investigation into N,N bidentate ligand additives (entries 6–8) showed 1,10-phenanthroline as an effective ligand to promote the reaction (entry 7). Further investigation of substituted 1,10-phenanthrolines revealed bathophenanthroline as the most effective in terms of yield and mass recovery (entry 11). Conducting the reaction at higher temperature ensured full conversion to product (Entries 12,13).

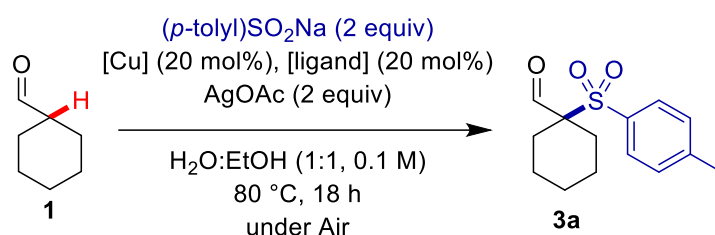

| Entry           | Cu (mol%)                       | Ligand                              | RSM (%) <sup>a</sup> | Yield 3a (%) <sup>a</sup> | Total (%) |
|-----------------|---------------------------------|-------------------------------------|----------------------|---------------------------|-----------|
| 1 <sup>b</sup>  | Cu(OAc) <sub>2</sub> (100)      | None                                | 14                   | 30                        | 44        |
| 2               | Cu(OAc) <sub>2</sub> (20)       | None                                | 14                   | 26                        | 40        |
| 3               | CuBr <sub>2</sub> (20)          | None                                | 20                   | 26                        | 46        |
| 4               | Cu(acac) <sub>2</sub> (20)      | None                                | 15                   | 28                        | 43        |
| 5               | Cu(OTf) <sub>2</sub> (20)       | None                                | 18                   | 33                        | 51        |
| 6               | Cu(OTf) <sub>2</sub> (20)       | 2,2'-Bipyridine                     | 17                   | 48                        | 65        |
| 7               | Cu(OTf) <sub>2</sub> (20)       | 1,10-Phenanthroline                 | 18                   | 52                        | 70        |
| 8               | Cu(OTf) <sub>2</sub> (20)       | Tetramethylethylenediamine          | 13                   | 29                        | 42        |
| 9               | Cu(OTf) <sub>2</sub> (20)       | 4,7-Dimethoxyphenanthroline         | 8                    | 38                        | 46        |
| 10              | Cu(OTf) <sub>2</sub> (20)       | 3,4,7,8-Tetramethylphenenanthroline | 13                   | 57                        | 70        |
| 11              | Cu(OTf) <sub>2</sub> (20)       | Bathophenanthroline                 | 19                   | 57                        | 76        |
| 12 <sup>c</sup> | <b>Cu(OTf)<sub>2</sub> (20)</b> | <b>Bathophenanthroline</b>          | <b>0</b>             | <b>74</b>                 | <b>74</b> |
| 13 <sup>d</sup> | <b>Cu(OTf)<sub>2</sub> (20)</b> | <b>Bathophenanthroline</b>          | <b>0</b>             | <b>74</b>                 | <b>74</b> |

**Table S1** – Optimisation of silver mediated  $\alpha$ -sulfonylation. Reactions performed on 0.2 mmol scale. <sup>a</sup> Yield determined in situ using 1,3,5-trimethoxybenzene as an internal standard. <sup>b</sup> 1 equiv of Cu(OAc)<sub>2</sub> used. <sup>c</sup> Reaction performed at 95 °C and at 1 M. <sup>d</sup> Reaction performed at 110 °C and at 1 M.

## DOE Optimisation of Reaction Conditions

Using JMP Pro 14 software, the following factors were investigated using a response surface design: copper loading, ligand loading, volume of EtOH, volume of H<sub>2</sub>O and oxidant loading were investigated as these had been previously shown to have a more significant impact on the yield. Temperature was fixed to 100 °C and time at 18 h. The ranges chosen are shown below: the JMP DoE software gave 26 experiments to run (Table S2).

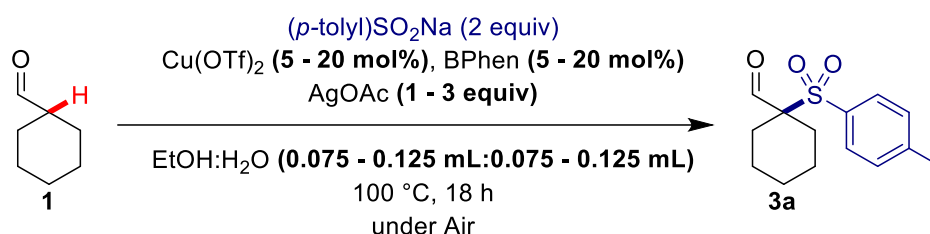

| Entry | Cat Loading (mol%) | Ligand Loading (mol%) | Vol. EtOH (mL) | Vol. EtOH (mL) | Oxidant equiv | Yield 3a (%) <sup>a</sup> |
|-------|--------------------|-----------------------|----------------|----------------|---------------|---------------------------|
| 1     | 5                  | 20                    | 0.125          | 0.125          | 3             | 24                        |
| 2     | 20                 | 5                     | 0.075          | 0.125          | 1             | 39                        |
| 3     | 5                  | 20                    | 0.075          | 0.075          | 3             | 36                        |
| 4     | 12.5               | 12.5                  | 0.125          | 0.1            | 2             | 53                        |
| 5     | 20                 | 20                    | 0.125          | 0.075          | 3             | 34                        |
| 6     | 20                 | 20                    | 0.075          | 0.1            | 1             | 38                        |
| 7     | 5                  | 5                     | 0.075          | 0.125          | 3             | 42                        |
| 8     | 5                  | 5                     | 0.075          | 0.075          | 1             | 24                        |
| 9     | 5                  | 20                    | 0.125          | 0.075          | 1             | 24                        |
| 10    | 12.5               | 5                     | 0.1            | 0.1            | 2             | 54                        |
| 11    | 5                  | 5                     | 0.125          | 0.125          | 1             | 32                        |
| 12    | 20                 | 5                     | 0.125          | 0.125          | 3             | 46                        |
| 13    | 12.5               | 20                    | 0.075          | 0.125          | 1             | 50                        |
| 14    | 20                 | 5                     | 0.125          | 0.075          | 1             | 47                        |
| 15    | 12.5               | 12.5                  | 0.075          | 0.075          | 2             | 56                        |
| 16    | 5                  | 20                    | 0.1            | 0.125          | 2             | 34                        |
| 17    | 5                  | 5                     | 0.125          | 0.075          | 3             | 55                        |
| 18    | 20                 | 20                    | 0.075          | 0.125          | 3             | 37                        |
| 19    | 12.5               | 12.5                  | 0.1            | 0.1            | 3             | 48                        |
| 20    | 5                  | 12.5                  | 0.075          | 0.1            | 2             | 26                        |
| 21    | 5                  | 12.5                  | 0.1            | 0.1            | 1             | 35                        |
| 22    | 20                 | 12.5                  | 0.1            | 0.125          | 2             | 53                        |
| 23    | 12.5               | 5                     | 0.1            | 0.1            | 2             | 54                        |
| 24    | 20                 | 20                    | 0.125          | 0.125          | 1             | 48                        |
| 25    | 20                 | 20                    | 0.1            | 0.075          | 2             | 58                        |
| 26    | 20                 | 5                     | 0.075          | 0.075          | 3             | 41                        |

**Table S2** – Silver mediated  $\alpha$ -Sulfonylation DoE data. Reactions performed on 0.2 mmol scale. <sup>a</sup> Yield determined in situ using 1,3,5-trimethoxybenzene as an internal standard.

The DoE software used this data to construct a model which both showed the goodness of fit of the data, comparing the predicted yield with the actual yield obtained (Figure S1). The experimental data was plotted against the predicted yield given by the red line shown in Figure S1. As the points do not deviate greatly from the trendline, the model fits well to the observed data. Experimental data points in red are highlighted as potential outliers by the software. Nonetheless, the R<sup>2</sup> value of this data is 0.95 indicating a 95% confidence in the results obtained from the data.

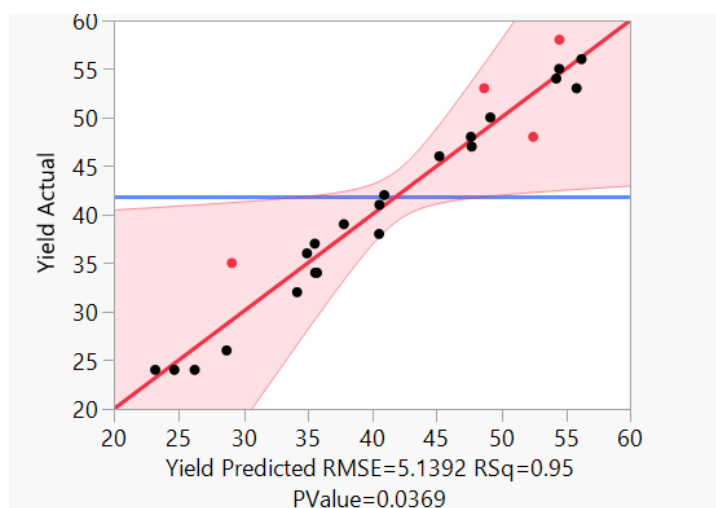

Figure S1 - Predicted vs actual yield.

The significance of each factor is shown below (Figure S2). Figure S2 denotes the log value of significance of each factor and combination of factors as calculated by JMP pro 14. A higher value for log worth signifies a higher relative significance of the factor with respect to yield of reaction. From this, it appears that the catalyst loading is most significant, with the interaction between catalyst and oxidant being next most significant.

| Source                          | LogWorth | PValue    |
|---------------------------------|----------|-----------|
| Cat. Loading(5,20)              | 2.005    | 0.00989   |
| Cat. Loading*Cat. Loading       | 1.966    | 0.01081   |
| Cat. Loading*Oxidant Loading    | 1.580    | 0.02631   |
| Vol H2O*Vol H2O                 | 1.495    | 0.03196   |
| Ligand Loading*Oxidant Loading  | 1.330    | 0.04679   |
| Vol EtOH*Vol EtOH               | 1.316    | 0.04834   |
| Ligand Loading(5,20)            | 1.277    | 0.05280 ^ |
| Ligand Loading*Vol EtOH         | 1.180    | 0.06603   |
| Cat. Loading*Ligand Loading     | 1.015    | 0.09664   |
| Vol EtOH(0.075,0.125)           | 0.604    | 0.24869 ^ |
| Vol H2O(0.075,0.125)            | 0.589    | 0.25762 ^ |
| Oxidant Loading*Oxidant Loading | 0.501    | 0.31520   |
| Ligand Loading*Ligand Loading   | 0.499    | 0.31711   |
| Oxidant Loading(1,3)            | 0.378    | 0.41867 ^ |
| Vol H2O*Oxidant Loading         | 0.295    | 0.50701   |
| Vol EtOH*Oxidant Loading        | 0.223    | 0.59873   |
| Cat. Loading*Vol H2O            | 0.170    | 0.67549   |
| Ligand Loading*Vol H2O          | 0.114    | 0.76902   |
| Vol EtOH*Vol H2O                | 0.043    | 0.90540   |
| Cat. Loading*Vol EtOH           | 0.007    | 0.98317   |

Figure S2 - Significance of each factor and interaction

The interaction plot describes the interactions of each variable (Figure S3). By focusing on this plot row by row, it is possible to understand how each of the factors interact with one another. If two factors are interacting, it would be expected that their high and low extremes (in blue and red respectively) will have different profiles to one another.

Looking at the row of catalyst loading first (row 1), box 1b shows the variation in yield at 20 mol% catalyst (in blue) and at 5 mol% (in red) as ligand loading increases from 5 to 20 mol%. Higher catalyst loading gives overall higher yield, with the increased loading of ligand having a maximum 12.5 mol%. At the lower catalyst loading, the ligand appears to have a negative interaction leading to reduced yields at high ligand loading.

This could be due to the formation of less catalytically competent copper species which is unable to effectively coordinate the substrate. For volumes of both EtOH and H<sub>2</sub>O (rows 3a,b and 4a,b), as the line profiles at high and low catalyst loadings are very similar, this implies that no significant interaction exists between the volume of either solvent and the catalyst loading. When comparing catalyst loading and oxidant loading (box 1e) at high catalyst loading, higher oxidants loadings were not well tolerated. However, the reverse is true at low catalyst loadings where more oxidant leads to higher yields.

The lower ligand loadings gave a consistently higher yield (for any loading shown, the red line (5 mol% ligand loading) is typically higher than the blue (20 mol% ligand loading)). As discussed above, the same catalyst – ligand interaction is observed (box 2a) however the decrease in yield at the extremes is more pronounced as the ligand loading is kept constant and the catalyst loading is changed. A slight interaction between the volume of EtOH and ligand loading is implied (box 2c) however no interaction is observed between volume of H<sub>2</sub>O and ligand loading (box 2d). Finally, like catalyst loading, the oxidant loading has an interaction with the ligand loading (box 2e).

Other than the interactions discussed previously, the volumes of each respective solvent do not have any significant interactions and best yields were observed at low H<sub>2</sub>O volume and EtOH volume.

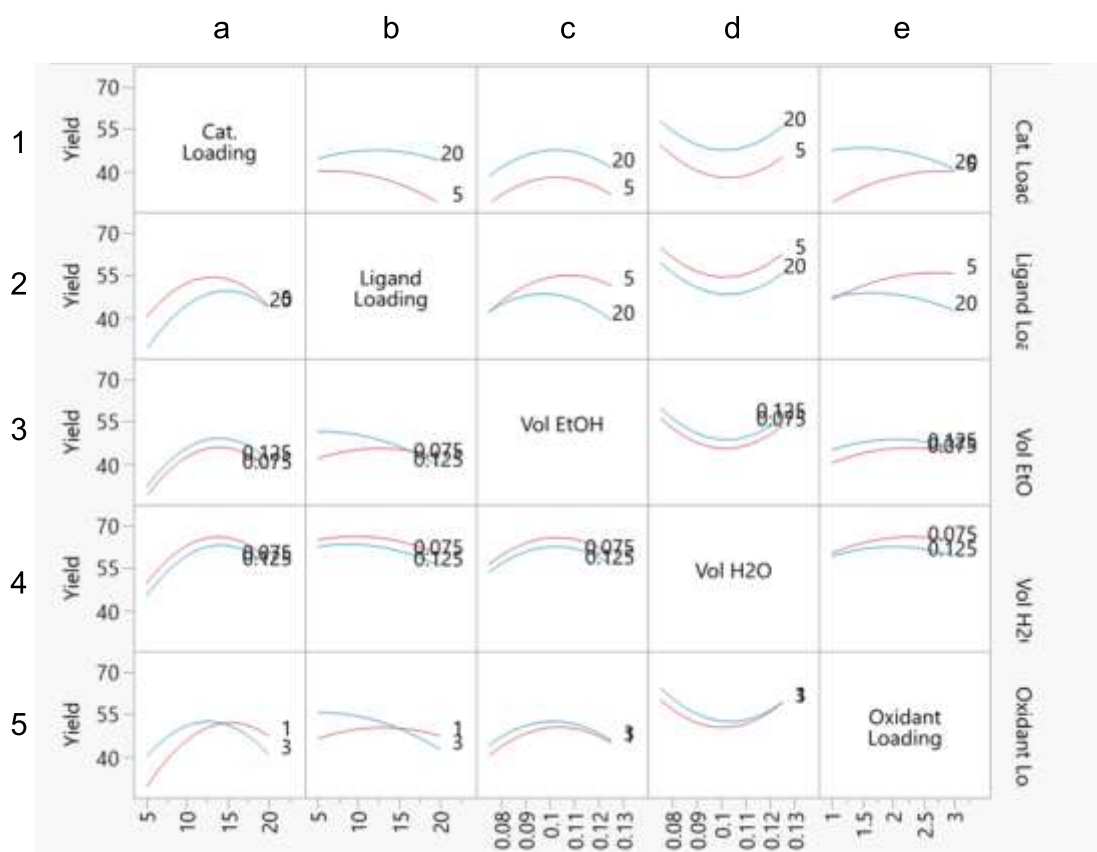

Figure S3 – DoE interaction plots

A key interaction observed from the DoE is that of oxidant and catalyst, at high catalyst loadings a low oxidant loading can be tolerated, so a model validation reaction was performed with the oxidant loading fixed at 1.5 equiv and with the loadings of other variables suggested by the model (Figure S4). Additionally, conditions which were predicted to maximise yield were also tested (Figure S5).

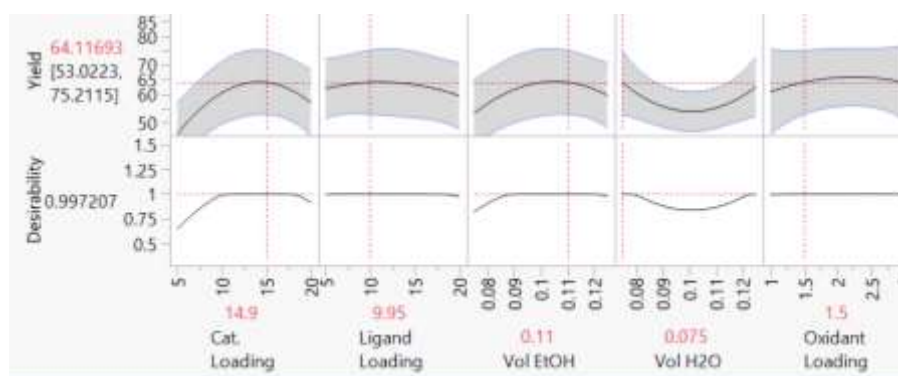

Figure S4 – Conditions predicted by model for maximum yield with 1.5 equiv of oxidant

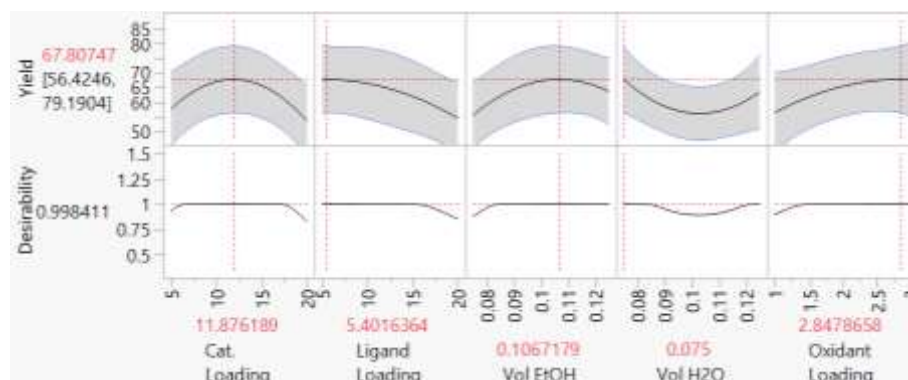

Figure S5 – Conditions predicted by model maximum yield

From the results obtained, the conditions predicted to give the highest yield with 1.5 equivalents of oxidant was in fact the highest overall yield and were chosen as the optimised conditions for this reaction (Table S3). In the absence of copper, ligand and oxidant under silver mediated conditions led to a significant reduction in yield (entries 2–4). When the reaction was performed under argon, a reduction in yield was observed implying oxygen is conducive to reactivity (entry 5). Using silver carbonate, manganese(III) acetate or  $\text{MnO}_2$  in place of silver acetate under these conditions led to reduced yields (entries 6–8). In the presence of radical traps, the reaction does not proceed implying the silver mediated conditions proceed *via* a radical mechanism (entries 9,10).

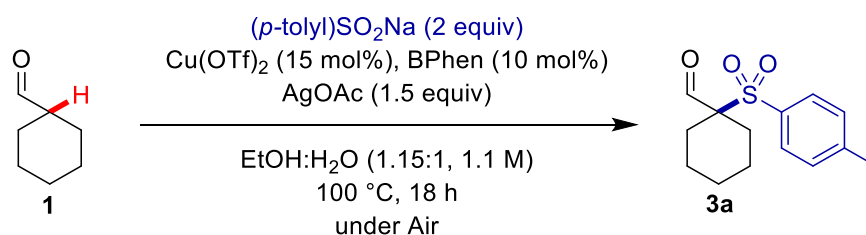

| Entry | Change to conditions                                          | Yield 3a (%) <sup>a</sup> |
|-------|---------------------------------------------------------------|---------------------------|
| 1     | None                                                          | 72                        |
| 2     | No Cu                                                         | trace                     |
| 3     | No Ligand                                                     | 47                        |
| 4     | No Ag                                                         | 14                        |
| 5     | Under argon                                                   | 46                        |
| 6     | 0.75 equiv $\text{Ag}_2\text{CO}_3$ instead of $\text{AgOAc}$ | 26                        |
| 7     | $\text{Mn}(\text{OAc})_3$ instead of $\text{AgOAc}$           | 27                        |
| 8     | $\text{MnO}_2$ instead of $\text{AgOAc}$                      | 30                        |
| 9     | + 2 equiv TEMPO                                               | 0                         |
| 10    | + 2 equiv dihydroanthracene                                   | 0                         |

**Table S3** – Silver mediated  $\alpha$ -Sulfonylation control reactions. Reactions performed on 0.2 mmol scale. <sup>a</sup>Yield determined in situ using 1,3,5-trimethoxybenzene as an internal standard.



## Investigation Into Acid Tuneable Oxidants

To overcome the limitations of the substrate scope, a stronger oxidant was needed. As  $\text{MnO}_2$  was compatible with the reaction conditions and we understood that the electrode potential of  $\text{MnO}_2$  could be controlled by changing the pH of the system, we hypothesised that using  $\text{MnO}_2$  under acidic conditions could allow it to be tuned to become a stronger oxidant for the reaction (see pourbaix diagram<sup>1</sup>). An array of acids and sulfonates were tested to determine the most effective acid(s) to promote the reaction and identify any options for fine tuning with challenging substrates (Scheme S1b). From the results, it was clear that acetic acid was the most effective, likely due to it rendering the  $\text{MnO}_2$  oxidising enough to promote the reaction even with the challenging salts without also enabling substrate/product degradation. Other stronger acids were less effective, and so led to  $\text{MnO}_2$  becoming too oxidising. Therefore, acetic acid was selected for the optimised reaction conditions.

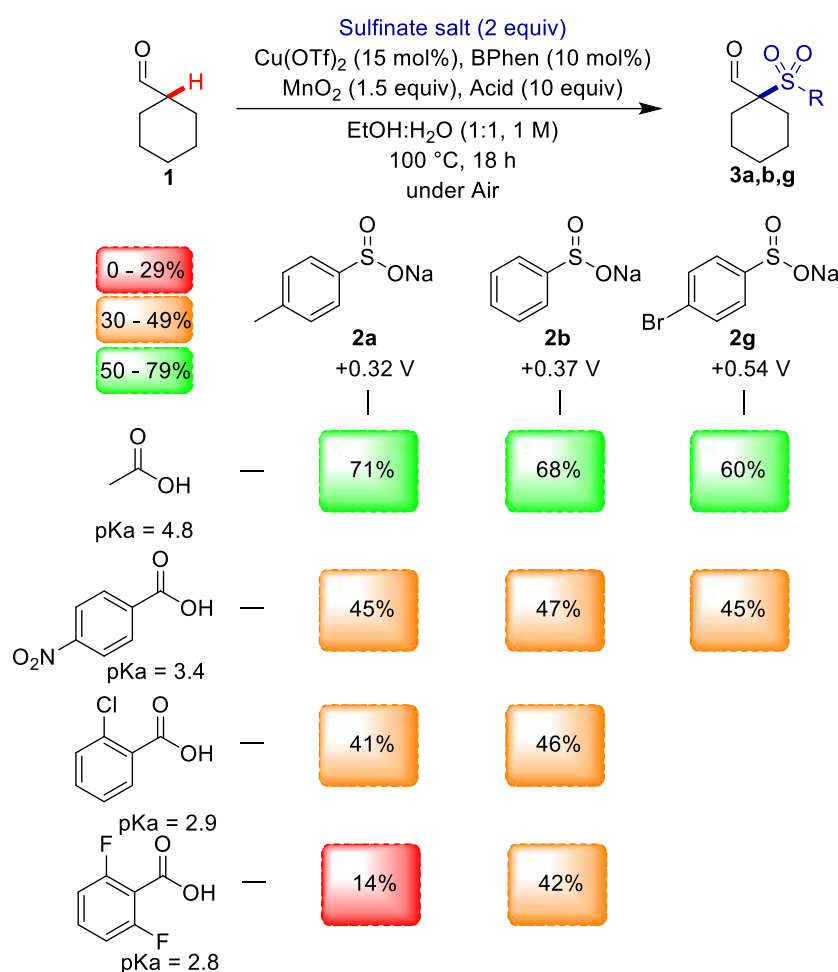

Scheme S1 – Acids and sulfonates of varying pKa and electrode potentials respectively.

The  $\text{MnO}_2$  is mostly insoluble at the start of the reaction. As the reaction progresses, the  $\text{MnO}_2$  reacts over the 18 h reaction time, seen visually by the disappearance of the black powder.

To investigate the potential reaction of the sulfonate salt directly with  $\text{MnO}_2$ , 2a was treated with  $\text{MnO}_2$  in EtOH/ $\text{H}_2\text{O}$  and separately in EtOH/ $\text{H}_2\text{O}$ /AcOH. No products of homocoupling of the sulfonates were observed, but further analysis was prevented by the polar nature of the salts, and the presence of paramagnetic manganese species.

## Synthesis of Sulfinate Salts

Sulfinate salts were prepared by two methods. Either using DABSO and an ArLi reagent,<sup>2</sup> or by the scheme shown below (Scheme S2).

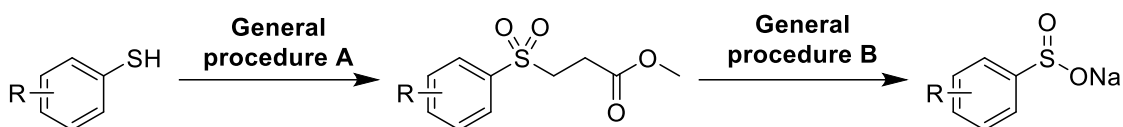

Scheme S2 – General scheme for the synthesis of sulfinate salts from thiols

### General Procedure A: Synthesis of Sulfones

Thiol (1 equiv) was added to a stirring solution of methyl acrylate (1 equiv) in THF:H<sub>2</sub>O (1:1, 0.3 M). Sodium acetate (0.15 equiv) was added and the reaction stirred for 18 h. The reaction was concentrated *in vacuo*, then the product was extracted from the aqueous phase with ethyl acetate, dried over Na<sub>2</sub>SO<sub>4</sub>, filtered and concentrated *in vacuo*. The residue was dissolved in CH<sub>2</sub>Cl<sub>2</sub> (0.05 M) and *m*CPBA (3 equiv) was added at rt and the reaction was stirred until completion, as determined by TLC. The reaction was quenched by the addition of 1 M NaOH then the product was extracted with CH<sub>2</sub>Cl<sub>2</sub>, dried over Na<sub>2</sub>SO<sub>4</sub>, filtered and concentrated *in vacuo* to afford the sulfone product.

### General Procedure B: Synthesis of Sulfinate Salts

Sodium hydride as a 60% dispersion in mineral oil (1.05 equiv) was added to a stirring solution of sulfone (1 equiv) in THF (0.17 M) at rt. After 30 min, anhydrous MeOH was added dropwise, then the reaction was concentrated *in vacuo*. The precipitate was filtered off and washed with hexane to afford the sulfinic acid sodium salt.

### 4-Methoxybenzenesulfinic acid sodium salt (2c)

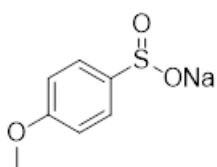

Procedure modified from Odell.<sup>2</sup> *n*BuLi (5.08 mL, 1.58 M in hexanes) was added dropwise to a stirring solution of 4-bromoanisole (1 mL, 8 mmol) in THF (10 mL) at –78 °C then stirred for 1 h at –78 °C. The aryl lithium solution was warmed to 0 °C and then added dropwise to another vessel containing DABSO (480 mg, 2 mmol) at –78 °C which was then stirred for 4 h at –78 °C. The reaction was quenched with the addition of aqueous Na<sub>2</sub>CO<sub>3</sub> (10% w/v, 10 mL) then the aqueous phase was washed with Et<sub>2</sub>O (3 × 10 mL). The aqueous phase was then acidified by the careful dropwise addition of H<sub>2</sub>SO<sub>4</sub> (95%, 3 mL) at 0 °C followed by extraction with Et<sub>2</sub>O (3 × 10 mL). The organic phases were basified with Na<sub>2</sub>CO<sub>3</sub> (10% w/v, 10 mL) and the organic phase was extracted with a saturated aqueous solution of Na<sub>2</sub>CO<sub>3</sub> (10% w/v, 3 × 30 mL) and the aqueous phase was concentrated *in vacuo*. EtOH (20 mL) was added to the crude residue and heated to reflux, then filtered. This was repeated once more with the filtrate with EtOH (20 mL) then concentrated *in vacuo* to afford sulfinic acid sodium salt **2c** as a white powder (218 mg, 28%). m.p. = >300 °C. IR (film)/cm<sup>–1</sup> 2955, 2840, 1591, 1490, 1244, 1043, 974, 834, 790. <sup>1</sup>H NMR (400 MHz, CD<sub>3</sub>OD) δ 7.58 (d, *J* = 8.7 Hz, 2 H, 2 × Ar–CH), 6.96 (d, *J* = 8.7 Hz, 2 H, 2 × Ar–CH), 3.81 (s, 3 H, CH<sub>3</sub>). <sup>13</sup>C NMR (101 MHz, CD<sub>3</sub>OD) δ 162.2 (Ar–C<sub>q</sub>), 149.2 (Ar–C<sub>q</sub>), 126.7 (2 × Ar–CH), 114.7 (2 × Ar–CH), 55.8 (CH<sub>3</sub>). Analytical data (IR, <sup>1</sup>H NMR, <sup>13</sup>C NMR) is in agreement with the reported literature.<sup>3</sup>

**Methyl 3-((4-(*tert*-butyl)phenyl)sulfonyl)propanoate (S1)**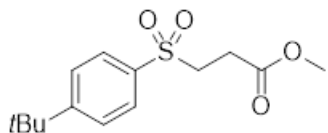

Prepared according to general procedure **A** using 4-*tert*-butylthiophenol (860  $\mu$ L, 5 mmol) which afforded sulfone **S1** as a white powder (1.52 g, quant). m.p. = 85–88 °C,  $R_f$  0.11 (20% EtOAc:hexane). IR (film)/ $\text{cm}^{-1}$  2963, 2870, 1741 (C=O), 1595, 1319, 1252, 1156, 1111, 842, 764, 712.  $^1\text{H}$  NMR (400 MHz,  $\text{CDCl}_3$ )  $\delta$  7.83 (d,  $J$  = 8.6 Hz, 2 H, 2  $\times$  Ar–CH), 7.59 (d,  $J$  = 8.6 Hz 2 H, 2  $\times$  Ar–CH), 3.65 (s, 3 H,  $\text{CH}_3$ ), 3.43 (t,  $J$  = 7.7 Hz, 2 H,  $\text{CH}_2$ ), 2.77 (t,  $J$  = 7.7 Hz, 2 H,  $\text{CH}_2$ ), 1.36 (s, 9 H,  $\text{C}(\text{CH}_3)_3$ ).  $^{13}\text{C}$  NMR (101 MHz,  $\text{CDCl}_3$ )  $\delta$  170.5 (C=O), 158.1 (Ar– $\text{C}_q$ ), 135.4 (Ar– $\text{C}_q$ ), 128.1 (2  $\times$  Ar–CH), 126.4 (2  $\times$  Ar–CH), 52.3 ( $\text{CH}_3$ ), 51.6 ( $\text{CH}_2$ ), 35.3 ( $\text{C}_q(\text{CH}_3)_3$ ), 31.1 ( $\text{C}_q(\text{CH}_3)_3$ ), 27.7 ( $\text{CH}_2$ ). HRMS (TOF-ESI $^+$ )  $m/z$  calcd. for  $\text{C}_{14}\text{H}_{21}\text{O}_4\text{S}$  [ $\text{M}+\text{H}$ ] $^+$ : 285.1161; found: 285.1163.

**4-(*tert*-Butyl)benzenesulfinic acid sodium salt (S2)**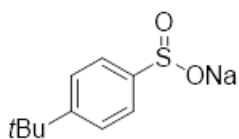

Prepared according to general procedure **B** using sulfone **S1** (1.32 g, 5 mmol) which afforded sulfinic acid sodium salt **S2** as a white solid (1.12 g, quant). m.p. = >300 °C. IR (film)/ $\text{cm}^{-1}$  3638, 3429, 2960, 2866, 1681, 1591, 1080, 1020, 834.  $^1\text{H}$  NMR (400 MHz,  $\text{CD}_3\text{OD}$ )  $\delta$  7.59–7.56 (m, 2 H, 2  $\times$  Ar–CH), 7.49–7.46 (m, 2 H, 2  $\times$  Ar–CH), 1.33 (s, 9 H,  $\text{C}(\text{CH}_3)_3$ ).  $^{13}\text{C}$  NMR (101 MHz,  $\text{CD}_3\text{OD}$ )  $\delta$  153.9 (Ar– $\text{C}_q$ ), 153.5 (Ar– $\text{C}_q$ ), 126.0 (2  $\times$  Ar–CH), 124.7 (2  $\times$  Ar–CH), 35.3 ( $\text{C}_q(\text{CH}_3)_3$ ), 31.5 ( $\text{C}_q(\text{CH}_3)_3$ ). Analytical data (IR,  $^1\text{H}$  NMR,  $^{13}\text{C}$  NMR) is in agreement with the reported literature.<sup>3</sup>

**4-Fluorobenzenesulfinic acid sodium salt (S3)**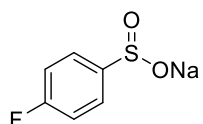

4-Fluorothiophenol (532  $\mu$ L, 5 mmol), methyl acrylate (450  $\mu$ L, 5 mmol), THF:H $_2$ O (1:1, 0.3 M) and sodium acetate (61 mg, 0.75 mmol) were added sequentially to the reaction then stirred at rt overnight. The reaction was concentrated *in vacuo*, then the product was extracted from the aqueous phase with ethyl acetate, dried over  $\text{Na}_2\text{SO}_4$ , filtered and concentrated *in vacuo*. The residue was dissolved in  $\text{CH}_2\text{Cl}_2$  (100 mL) and *m*CPBA (2.9 g, 12.5 mmol) was added at rt and the reaction was stirred until completion, as determined by TLC. The reaction was quenched by the addition of 1 M NaOH then the product was extracted with  $\text{CH}_2\text{Cl}_2$ , dried over  $\text{Na}_2\text{SO}_4$ , filtered and concentrated *in vacuo*. The residue was dissolved in dry MeOH and THF (1:1, 0.5 M) under an atmosphere of argon, and sodium hydroxide (168 mg, 4.2 mmol) was added at 0 °C. The precipitate was filtered off and washed with hexane which afforded sulfinic acid sodium salt **S3** as a white powder (390 mg, 43%). m.p. = >300 °C. IR (film)/ $\text{cm}^{-1}$  3444, 3280, 1587, 1487, 1237, 1151, 1077, 1017, 980, 827, 712.  $^1\text{H}$  NMR (400 MHz, MeOD)  $\delta$  7.70–7.65 (m, 2 H, 2  $\times$  Ar–CH), 7.17–7.12 (m, 2 H, 2  $\times$  Ar–CH).  $^{13}\text{C}$  NMR (101 MHz, MeOD)  $\delta$  164.9 (d,  $^1J_{\text{C-F}}$  = 246.2 Hz, Ar– $\text{C}_q$ ), 153.5 (Ar– $\text{C}_q$ ), 127.5 (d,  $^3J_{\text{C-F}}$  = 8.6 Hz, 2  $\times$  Ar–CH), 116.1 (d,  $^2J_{\text{C-F}}$  = 22.1 Hz, 2  $\times$  Ar–CH).  $^{19}\text{F}$  NMR (377 MHz, MeOD)  $\delta$  -114.69. Analytical data (IR,  $^1\text{H}$  NMR,  $^{13}\text{C}$  NMR and  $^{19}\text{F}$  NMR) is in agreement with the reported literature.<sup>3</sup>

**4-Chlorobenzenesulfinic acid sodium salt (S4)**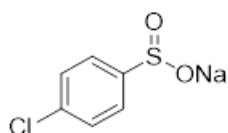

4-Chlorothiophenol (720 mg, 5 mmol), methyl acrylate (450  $\mu$ L, 5 mmol), THF:H $_2$ O (1:1, 0.3 M) and sodium acetate (61 mg, 0.75 mmol) were combined sequentially then stirred at rt overnight. The reaction was concentrated *in vacuo*, then the product was extracted from the aqueous phase with ethyl acetate, dried over  $\text{Na}_2\text{SO}_4$ , filtered and concentrated *in vacuo*. The residue was dissolved in  $\text{CH}_2\text{Cl}_2$  (100 mL) and *m*CPBA (2.9 g, 12.5 mmol) was added at rt and the reaction was stirred until completion, as determined by TLC. The reaction was quenched by the addition of 1 M NaOH then the product was extracted with  $\text{CH}_2\text{Cl}_2$ , dried over  $\text{Na}_2\text{SO}_4$ , filtered and concentrated *in vacuo*. The residue was dissolved in dry  $\text{CH}_2\text{Cl}_2$  (45 mL) under an atmosphere of argon, and sodium hydroxide (5 M in MeOH, 948  $\mu$ L) was added at 0 °C. The precipitate was filtered off and washed with hexane which afforded sulfinic acid sodium salt **S4** as a white powder (900 mg, 91%). m.p. = >300 °C. IR (film)/ $\text{cm}^{-1}$  3448, 3269, 2974, 1572, 1467, 1077, 1047, 977, 828, 738, 712.  $^1\text{H}$  NMR (400 MHz, MeOD)  $\delta$  7.64–7.61 (m, 2 H, 2  $\times$  Ar–CH), 7.44–7.40 (m, 2 H, 2  $\times$  Ar–CH).  $^{13}\text{C}$  NMR (101 MHz, MeOD)  $\delta$  156.2 (Ar– $\text{C}_q$ ), 136.3

(Ar-C<sub>q</sub>), 129.5 (2 × Ar-CH), 127.0 (2 × Ar-CH). Analytical data (IR, <sup>1</sup>H NMR and <sup>13</sup>C NMR) is in agreement with the reported literature.<sup>3</sup>

### Methyl 3-((4-bromophenyl)sulfonyl)propanoate (**S5**)

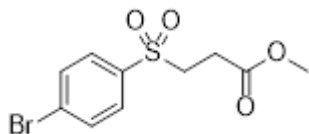

Prepared according to general procedure **A** using *p*-bromothiophenol (0.95 g, 5 mmol) which afforded sulfone **S5** as a white solid (1.52 g, 99%). m.p. = 65–69 °C. R<sub>f</sub> 0.11 (20% EtOAc:hexane). IR (film)/cm<sup>-1</sup> 2996, 3097, 2956, 1729 (C=O), 1573, 1248, 1162, 987, 798, 627. <sup>1</sup>H NMR (400 MHz, CDCl<sub>3</sub>) δ 7.79 (d, *J* = 8.8 Hz, 2 H, 2 × Ar-CH), 7.74 (d, *J* = 8.8 Hz, 2 H, 2 × Ar-CH), 3.66 (s, 3 H, CH<sub>3</sub>), 3.48–3.39 (t, *J* = 7.7 Hz, 2 H, CH<sub>2</sub>), 2.77 (t, *J* = 7.7 Hz, 2 H, CH<sub>2</sub>). <sup>13</sup>C NMR (101 MHz, CDCl<sub>3</sub>) δ 170.3 (C=O), 137.5 (Ar-C<sub>q</sub>), 132.8 (2 × Ar-CH), 129.7 (2 × Ar-CH), 129.5 (Ar-C<sub>q</sub>), 52.4 (CH<sub>3</sub>), 51.5 (CH<sub>2</sub>), 27.5 (CH<sub>2</sub>). HRMS (FTMS + p APCI) *m/z* calcd. for C<sub>10</sub>H<sub>12</sub>O<sub>4</sub>SBr [M+H]<sup>+</sup>: 306.9634; found: 306.9639.

### 4-Bromobenzenesulfinic acid sodium salt (**2g**)

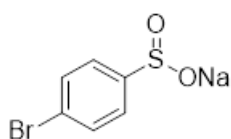

Prepared according to general procedure **B** using sulfone **S5** (1.43 g, 5 mmol) which afforded sulfinic acid sodium salt **2g** as a white powder (993 mg, 82%). m.p. = >300 °C. IR (film)/cm<sup>-1</sup> 3478, 3280, 2568, 2438, 1569, 1468, 998, 927. <sup>1</sup>H NMR (400 MHz, CD<sub>3</sub>OD) δ 7.60–7.55 (m, 4 H, 4 × Ar-CH). <sup>13</sup>C NMR (101 MHz, CD<sub>3</sub>OD) δ 156.6 (Ar-C<sub>q</sub>), 132.5 (2 × Ar-CH), 127.3 (2 × Ar-CH), 124.5 (Ar-C<sub>q</sub>). Analytical data (IR, <sup>1</sup>H NMR, <sup>13</sup>C NMR) is in agreement with the reported literature.<sup>3</sup>

### Methyl 3-((4-trifluoromethylphenyl)thio)propanoate (**S6**)

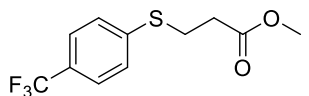

4-(Trifluoromethyl)thiophenol (1.4 mL, 10 mmol) was added to a stirring solution of methyl acrylate (0.9 mL, 10 mmol) in THF (16.7 mL) and water (16.7 mL). Sodium acetate (123 mg, 1.5 mmol) was added and the reaction stirred for 18 h. The reaction was concentrated *in vacuo*, then the product was extracted from the aqueous phase with ethyl acetate (3 × 20 mL), dried over Na<sub>2</sub>SO<sub>4</sub>, filtered and concentrated *in vacuo* to afford sulfide **S6** as a white solid (2.66 g, quant.). m.p. = 74–77 °C. R<sub>f</sub> 0.50 (40% EtOAc:hexane). IR (film)/cm<sup>-1</sup> 2922, 2960, 1730 (C=O), 1603, 1438, 1323, 1252, 1163, 1096, 1062, 832, 674. <sup>1</sup>H NMR (400 MHz, CDCl<sub>3</sub>) δ 7.58–7.53 (m, 2 H, 2 × Ar-CH), 7.40 (d, *J* = 7.9 Hz, 2 H, 2 × Ar-CH), 3.71 (s, 3 H, CH<sub>3</sub>), 3.25 (t, *J* = 7.4 Hz, 2 H, CH<sub>2</sub>), 2.68 (t, *J* = 7.4 Hz, 2 H, CH<sub>2</sub>). <sup>13</sup>C NMR (101 MHz, CDCl<sub>3</sub>) δ 171.8 (C=O), 140.9 (Ar-C<sub>q</sub>), 128.1 (4 × Ar-CH), 125.8 (q, <sup>2</sup>*J*<sub>C-F</sub> = 3.2 Hz, Ar-C<sub>q</sub>), 125.3 (q, <sup>1</sup>*J*<sub>C-F</sub> = 170 Hz, CF<sub>3</sub>), 51.9 (CH<sub>3</sub>), 33.7 (CH<sub>2</sub>), 27.7 (CH<sub>2</sub>). <sup>19</sup>F NMR (377 MHz, CDCl<sub>3</sub>) δ -62.48 (CF<sub>3</sub>). HRMS (TOF-ESI) *m/z* calcd. for C<sub>11</sub>H<sub>10</sub>O<sub>2</sub>SF<sub>3</sub> [M-H]<sup>-</sup>: 263.0354; found: 263.0347.

### Methyl 3-((4-(trifluoromethyl)phenyl)sulfonyl)propanoate (**S7**)

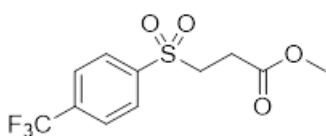

*m*CPBA (5.18 g, 30 mmol) was added to a stirring solution of sulfide **S6** (2.63 g, 10 mmol) in CH<sub>2</sub>Cl<sub>2</sub> (200 mL) at rt. The reaction was quenched by the addition of 1M NaOH (100 mL) and the product was extracted with CH<sub>2</sub>Cl<sub>2</sub> (3 × 100 mL), dried over Na<sub>2</sub>SO<sub>4</sub>, filtered then concentrated *in vacuo* which afforded sulfone **S7** as a colourless oil (2.89 g, 98%). R<sub>f</sub> 0.11 (20% EtOAc:hexane). IR (film)/cm<sup>-1</sup> 3001, 1960, 1737 (C=O), 1402, 1323, 1263, 1151, 1122, 1062, 846, 775, 734. <sup>1</sup>H NMR (400 MHz, CDCl<sub>3</sub>) δ 8.08 (d, <sup>3</sup>*J*<sub>H-H</sub> = 8.1 Hz, 2 H, 2 × Ar-CH), 7.87 (d, <sup>3</sup>*J*<sub>H-H</sub> = 8.1 Hz, 2 H, 2 × Ar-CH), 3.66 (s, 3 H, CH<sub>3</sub>), 3.48 (t, *J* = 7.6 Hz, 2 H, CH<sub>2</sub>), 2.80 (t, *J* = 7.6 Hz, 2 H, CH<sub>2</sub>). <sup>13</sup>C NMR (101 MHz, CDCl<sub>3</sub>) δ 170.1 (C=O), 142.1 (Ar-C<sub>q</sub>), 128.9 (4 × Ar-CH), 126.6 (q, <sup>2</sup>*J*<sub>C-F</sub> = 3.8 Hz, Ar-C<sub>q</sub>), 52.4 (CH<sub>3</sub>), 51.5 (CH<sub>2</sub>), 27.4 (CH<sub>2</sub>). <sup>19</sup>F NMR (377 MHz, CDCl<sub>3</sub>) δ -63.26. Analytical data (IR, <sup>1</sup>H NMR, <sup>13</sup>C NMR) is in agreement with the reported literature.<sup>4</sup> It was not possible to observe the quaternary CF<sub>3</sub> signal due to C–F coupling.

**4-(Trifluoromethyl)benzenesulfinic acid sodium salt (2h)**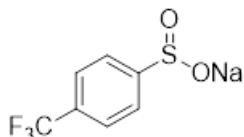

Synthesised according to general procedure **B** using sulfone **S7** (2.8 g, 9.45 mmol) which afforded sulfinic acid sodium salt **2h** as an off white solid (2.28 g, quant). m.p. = >300 °C. IR (film)/cm<sup>-1</sup> 3396, 1581, 1323, 1193, 1044, 972, 741, 693. <sup>1</sup>H NMR (400 MHz, CD<sub>3</sub>OD) δ 7.84 (d, *J* = 8.1 Hz, 2 H, 2 × Ar-CH), 7.73 (d, *J* = 8.1 Hz, 2 H, 2 × Ar-CH). <sup>13</sup>C NMR (101 MHz, CD<sub>3</sub>OD) δ 161.4 (Ar-C<sub>q</sub>), 132.3 (q, <sup>2</sup>*J*<sub>C-F</sub> = 32.1 Hz, Ar-C<sub>q</sub>), 126.4 (q, <sup>3</sup>*J*<sub>C-F</sub> = 3.9 Hz, 2 × Ar-CH), 126.0 (2 × Ar-CH), 125.5 (q, <sup>1</sup>*J*<sub>C-F</sub> = 271.4 Hz, CF<sub>3</sub>). <sup>19</sup>F NMR (377 MHz, CD<sub>3</sub>OD) δ -63.92. analytical data (IR, <sup>1</sup>H NMR, <sup>13</sup>C NMR) is in agreement with the reported literature.<sup>3</sup> Contains 8% of an inseparable impurity.

**Methyl 3-(naphthalen-1-ylsulfonyl)propanoate (S8)**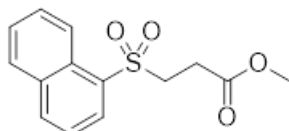

Prepared according to general procedure **A** using 1-naphthalenethiol (690 μL, 5 mmol) which afforded sulfone **S8** as a colourless oil (1.43 g, quant). m.p. = 95–99 °C. R<sub>f</sub> 0.11 (20% EtOAc:hexane). IR (film)/cm<sup>-1</sup> 3064, 2983, 2937, 1733 (C=O), 1506, 1438, 1312, 1252, 1156, 1122, 1070, 9915, 772. <sup>1</sup>H NMR (400 MHz, CDCl<sub>3</sub>) δ 8.75 (dq, *J* = 8.7, 0.9 Hz, 1 H, Ar-CH), 8.31 (dd, *J* = 7.3, 1.3 Hz, 1 H, Ar-CH), 8.17 (dt, *J* = 8.4, 1.3 Hz, 1 H, Ar-CH), 8.00 (ddt, *J* = 8.1, 1.3, 0.6 Hz, 1 H, Ar-CH), 7.75 (ddd, *J* = 8.7, 6.9, 1.4 Hz, 1 H, Ar-CH), 7.68–7.61 (m, 2 H, 2 × Ar-CH), 3.66–3.62 (t, *J* = 7.6 Hz, 2 H, CH<sub>2</sub>), 3.59 (s, 3 H, CH<sub>3</sub>), 2.82–2.73 (t, *J* = 7.6 Hz, 2 H, CH<sub>2</sub>). <sup>13</sup>C NMR (101 MHz, CDCl<sub>3</sub>) δ 170.4 (C=O), 135.5 (Ar-CH), 134.2 (Ar-C<sub>q</sub>), 133.4 (Ar-C<sub>q</sub>), 130.9 (Ar-CH), 129.3 (Ar-CH), 129.0 (Ar-CH), 128.9 (Ar-C<sub>q</sub>), 127.2 (Ar-CH), 124.4 (Ar-CH), 124.0 (Ar-CH), 52.2 (CH<sub>3</sub>), 51.0 (CH<sub>2</sub>), 27.6 (CH<sub>2</sub>). Analytical data (IR, <sup>1</sup>H NMR, <sup>13</sup>C NMR) is in agreement with the reported literature.

**Naphthalene-1-sulfinic acid sodium salt (S9)**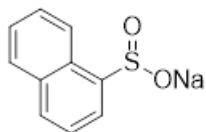

Prepared according to general procedure **B** using sulfone **S8** (1.25 g, 4.5 mmol). The crude sulfinic acid sodium salt was dissolved in hot EtOH, then crystallised by the addition of hexane (20 ml). the precipitate was filtered off and washed with hexane to give sulfinic acid sodium salt **S9** as a white solid (408 mg, 43%). m.p. = >300 °C. IR (film)/cm<sup>-1</sup> 3386, 3049, 1502, 1559, 1398, 1141, 1029, 951, 798, 772, 663. <sup>1</sup>H NMR (400 MHz, CD<sub>3</sub>OD) δ 8.71 (ddt, *J* = 8.3, 1.5, 0.8 Hz, 1 H, Ar-CH), 8.02 (dd, *J* = 7.1, 1.3 Hz, 1 H, Ar-CH), 7.92–7.88 (m, 2 H, 2 × Ar-CH), 7.57–7.48 (m, 3 H, 3 × Ar-CH). <sup>13</sup>C NMR (101 MHz, CD<sub>3</sub>OD) δ 152.0 (Ar-C<sub>q</sub>), 135.4 (Ar-C<sub>q</sub>), 131.4 (Ar-C<sub>q</sub>), 130.9 (Ar-CH), 129.4 (Ar-CH), 127.0 (Ar-CH), 126.9 (Ar-CH), 126.3 (Ar-CH), 124.8 (Ar-CH), 121.5 (Ar-CH). Analytical data (IR, <sup>1</sup>H NMR, <sup>13</sup>C NMR) is in agreement with the reported literature.<sup>5</sup>

**Methyl 3-(o-tolylsulfonyl)propanoate (S10)**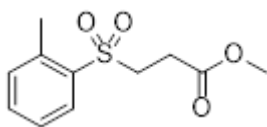

Prepared according to general procedure **A** using 2-methylbenzenethiol (860 μL, 5 mmol) which afforded sulfone **S10** as a colourless oil (1.15 g, 95%). R<sub>f</sub> 0.05 (20% EtOAc:hexane). IR (film)/cm<sup>-1</sup> 3064, 2952, 1737 (C=O), 1439, 1364, 1312, 1248, 1223, 1148, 1125, 1058, 976, 730. <sup>1</sup>H NMR (400 MHz, CDCl<sub>3</sub>) δ 7.99 (dd, *J* = 7.7, 1.5 Hz, 1 H, Ar-CH), 7.54 (td, *J* = 7.7, 1.5 Hz, 1 H, Ar-CH), 7.41–7.35 (m, 2 H, 2 × Ar-CH), 3.62 (s, 3 H, OCH<sub>3</sub>), 3.47 (t, *J* = 7.6 Hz, 2 H, CH<sub>2</sub>), 2.77 (t, *J* = 7.6 Hz, 2 H, CH<sub>2</sub>), 2.72 (s, 3 H, CH<sub>3</sub>). <sup>13</sup>C NMR (101 MHz, CDCl<sub>3</sub>) δ 170.5 (C=O), 138.3 (Ar-C<sub>q</sub>), 136.4 (Ar-C<sub>q</sub>), 134.0 (Ar-CH), 132.9 (Ar-CH), 130.4 (Ar-CH), 126.6 (Ar-CH), 52.3 (OCH<sub>3</sub>), 50.4 (CH<sub>3</sub>), 27.4 (CH<sub>2</sub>), 20.3 (CH<sub>2</sub>). HRMS (TOF-ESI<sup>+</sup>) *m/z* calcd. for C<sub>14</sub>H<sub>17</sub>NO<sub>4</sub>NaS [M+MeCN+Na]<sup>+</sup>: 306.0776; found: 306.0768.

**2-Methylbenzenesulfinic acid sodium salt (S11)**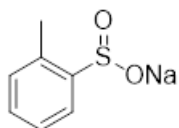

Prepared according to general procedure **B** using sulfone **S10** (872 mg, 4.5 mmol). The crude sulfinic acid sodium salt was dissolved in hot EtOH, then precipitated by the addition of hexane (20 ml). The precipitate was filtered off and washed with hexane to give sulfinic acid

sodium salt **S11** as a white solid (281 mg, 35%). m.p. = >300 °C. IR (film)/cm<sup>-1</sup> 3470, 3392, 3299, 1674, 999, 965, 752, 862. <sup>1</sup>H NMR (400 MHz, CD<sub>3</sub>OD) δ 7.81 (dd, *J* = 7.1, 2.1 Hz, 1 H, Ar-CH), 7.26 (m, 2 H, 2 × Ar-CH), 7.14 (dd, *J* = 6.5, 2.1 Hz, 1 H, Ar-CH), 2.57 (s, 3 H, CH<sub>3</sub>). <sup>13</sup>C NMR (101 MHz, CD<sub>3</sub>OD) δ 154.0 (Ar-C<sub>q</sub>), 136.7 (Ar-C<sub>q</sub>), 131.5 (Ar-CH), 130.4 (Ar-CH), 127.0 (Ar-CH), 122.9 (Ar-CH), 18.4 (CH<sub>3</sub>). Analytical data (IR, <sup>1</sup>H NMR, <sup>13</sup>C NMR) is in agreement with the reported literature.<sup>3</sup>

## Manganese(IV) Oxide Mediated $\alpha$ -Sulfonylation

### General Procedure C: Using $\text{MnO}_2$

Manganese(IV) oxide (1.5 equiv), copper(II) triflate (15 mol%), bathophenanthroline (10 mol%), sulfinic acid sodium salt (2 equiv), aldehyde (1 equiv),  $\text{H}_2\text{O}:\text{EtOH}:\text{AcOH}$  (1:1:1, 0.67 M) were added sequentially to a microwave vial under air, sealed and submerged in an oil bath preheated to 100 °C for 18 h. The reaction was allowed to cool to room temperature, diluted with EtOAc, filtered through silica eluting with EtOAc then concentrated *in vacuo*. The crude product was purified by flash column chromatography.

### General Procedure D: Using $\text{AgOAc}$

Silver acetate (1.5 equiv), copper(II) triflate (15 mol%), bathophenanthroline (10 mol%), sulfinic acid sodium salt (2 equiv), aldehyde (1 equiv),  $\text{H}_2\text{O}:\text{EtOH}$  (1.15:1, 1.1 M) were added sequentially to a microwave vial under air, sealed and submerged in an oil bath preheated to 100 °C for 18 h. The reaction was allowed to cool to room temperature, diluted with EtOAc, filtered through silica eluting with EtOAc then concentrated *in vacuo*. The crude product was purified by flash column chromatography.

## Reaction Scope Varying the Sulfinic Salts

### 1-(4-Methylbenzene-1-sulfonyl)cyclohexane-1-carbaldehyde (**3a**)

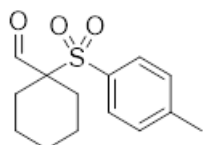

Prepared according to general procedure **C** ( $\text{MnO}_2$ ) using cyclohexane carboxaldehyde **1** (48  $\mu\text{L}$ , 0.4 mmol) and 4-methylbenzenesulfinic acid sodium salt **2a** (142 mg, 0.8 mmol). Purification by flash column chromatography (5–20%  $\text{Et}_2\text{O}:\text{pentane}$ ) afforded  $\alpha$ -sulfonyl aldehyde **3a** as a yellow solid (83.3 mg, 78%). m.p. = 77–78 °C.  $R_f$  0.09 (20%  $\text{Et}_2\text{O}:\text{pentane}$ ).

IR (film)/ $\text{cm}^{-1}$  2937, 2859, 1722 (C=O), 1595, 1454, 1316, 1144, 1088, 816.  $^1\text{H}$  NMR (400 MHz,  $\text{CDCl}_3$ )  $\delta$  9.66 (s, 1 H, CHO), 7.59 (d,  $J$  = 8.1 Hz, 2 H, 2  $\times$  Ar–CH), 7.34 (d,  $J$  = 8.1 Hz, 2 H, 2  $\times$  Ar–CH), 2.45 (s, 3 H,  $\text{CH}_3$ ), 2.27 (d,  $J$  = 13.3 Hz, 2 H, 2  $\times$   $\text{C}_q\text{CHH}$ ), 1.91 (ddd,  $J$  = 13.3, 13.3, 3.3 Hz, 2 H, 2  $\times$   $\text{C}_q\text{CHH}$ ), 1.80–1.75 (m, 2 H, 2  $\times$   $\text{C}_q\text{CH}_2\text{CHH}$ ), 1.66–1.62 (m, 1 H,  $\text{C}_q\text{CH}_2\text{CH}_2\text{CHH}$ ), 1.22–1.07 (m, 3 H, 2  $\times$   $\text{C}_q\text{CH}_2\text{CHH}$  +  $\text{C}_q\text{CH}_2\text{CH}_2\text{CHH}$ ).  $^{13}\text{C}$  NMR (101 MHz,  $\text{CDCl}_3$ )  $\delta$  197.8 (CHO), 145.5 (Ar– $\text{C}_q$ ), 132.0 (Ar– $\text{C}_q$ ), 129.9 (2  $\times$  Ar–CH), 129.6 (2  $\times$  Ar–CH), 74.0 ( $\text{C}_q$ ), 25.2 (2  $\times$   $\text{CH}_2$ ), 24.3 ( $\text{CH}_2$ ), 21.9 (2  $\times$   $\text{CH}_2$ ), 21.7 ( $\text{CH}_3$ ). HRMS (TOF-ESI $^+$ )  $m/z$  calcd. For  $\text{C}_{14}\text{H}_{19}\text{O}_3\text{S}$   $[\text{M}+\text{H}]^+$ : 267.1055; found: 267.1060.

Prepared on 2 mmol scale with manganese conditions to afford  $\alpha$ -sulfonyl aldehyde **3a** (438 mg, 82%).

For procedure on 6 mmol scale, see section on gram scale synthesis.

Also prepared using silver mediated conditions according to general procedure D which afforded  $\alpha$ -sulfonyl aldehyde **3a** (73.1 mg, 69%).

**1-(Phenylsulfonyl)cyclohexane-1-carbaldehyde (3b)**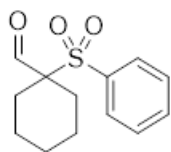

Prepared according to general procedure **C** using cyclohexane carboxaldehyde **1** (48  $\mu$ L, 0.4 mmol) and benzenesulfinic acid sodium salt **2b** (131 mg, 0.8 mmol). Purification by flash column chromatography (5–20% Et<sub>2</sub>O:pentane) afforded  $\alpha$ -sulfonyl aldehyde **3b** as a colourless oil (78.4 mg, 78% yield). *R*<sub>f</sub> 0.21 (20% Et<sub>2</sub>O:pentane). IR (film)/cm<sup>-1</sup> 2937, 2858, 1722 (C=O), 1446, 1308, 1144, 1088, 734, 690. <sup>1</sup>H NMR (400 MHz, CDCl<sub>3</sub>)  $\delta$  9.67 (s, 1 H, CHO), 7.74–7.66 (m, 3 H, 3  $\times$  Ar-CH), 7.57–7.54 (t, *J* = 7.7 Hz, 2 H, 2  $\times$  Ar-CH), 2.27 (d, *J* = 13.0 Hz, 2 H, 2  $\times$  C<sub>q</sub>CHH), 1.92 (ddd, *J* = 13.0, 13.0, 3.8 Hz, 2 H, 2  $\times$  C<sub>q</sub>CHH), 1.81–1.75 (m, 2 H, 2  $\times$  C<sub>q</sub>CH<sub>2</sub>CHH), 1.66–1.63 (m, 1 H, C<sub>q</sub>CH<sub>2</sub>CH<sub>2</sub>CHH), 1.19–1.11 (m, 3 H, 2  $\times$  C<sub>q</sub>CH<sub>2</sub>CHH + C<sub>q</sub>CH<sub>2</sub>CH<sub>2</sub>CHH). <sup>13</sup>C NMR (101 MHz, CDCl<sub>3</sub>)  $\delta$  197.6 (CHO), 135.0 (Ph-CH), 134.3 (Ph-CH), 129.9 (2  $\times$  Ph-CH), 129.0 (2  $\times$  Ph-CH), 74.0 (C<sub>q</sub>), 25.1 (2  $\times$  CH<sub>2</sub>), 24.3 (CH<sub>2</sub>), 21.9 (2  $\times$  CH<sub>2</sub>). HRMS (FTMS + p APCI) *m/z* calcd. For C<sub>13</sub>H<sub>17</sub>O<sub>3</sub>S [M+H]<sup>+</sup>: 253.0893; found: 253.0890.

Also prepared using silver mediated conditions according to general procedure **D** which afforded  $\alpha$ -sulfonyl aldehyde **3b** (54.2 mg, 54%).

**1-((4-Methoxyphenyl)sulfonyl)cyclohexane-1-carbaldehyde (3c)**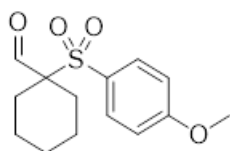

Prepared according to general procedure **C** using cyclohexane carboxaldehyde **1** (48  $\mu$ L, 0.4 mmol) and 4-methoxybenzenesulfinic acid sodium salt **2c** (155 mg, 0.8 mmol). Purification by flash column chromatography (20% Et<sub>2</sub>O:hexane) afforded  $\alpha$ -sulfonyl aldehyde **3c** as a colourless oil (80.5 mg, 71% yield). *R*<sub>f</sub> 0.14 (20% Et<sub>2</sub>O:hexane). IR (film)/cm<sup>-1</sup> 2937, 2855, 1722 (C=O), 1595, 1498, 1315, 1263, 1140, 1088, 1021, 834, 805, 667. <sup>1</sup>H NMR (400 MHz, CDCl<sub>3</sub>)  $\delta$  9.65 (s, 1 H, CHO), 7.63 (d, *J* = 9.0 Hz, 2 H, 2  $\times$  Ar-CH), 6.99 (d, *J* = 9.0 Hz, 2 H, 2  $\times$  Ar-CH), 3.88 (s, 3 H, CH<sub>3</sub>), 2.27 (ddd, *J* = 13.4, 2.9, 1.4 Hz, 2 H, 2  $\times$  C<sub>q</sub>CHH), 1.89 (ddd, *J* = 13.4, 13.4, 3.7 Hz, 2 H, 2  $\times$  C<sub>q</sub>CHH), 1.82–1.72 (m, 2 H, 2  $\times$  C<sub>q</sub>CH<sub>2</sub>CHH), 1.68–1.59 (m, 1 H, C<sub>q</sub>CH<sub>2</sub>CH<sub>2</sub>CHH), 1.23–1.07 (m, 3 H, 2  $\times$  C<sub>q</sub>CH<sub>2</sub>CHH + C<sub>q</sub>CH<sub>2</sub>CH<sub>2</sub>CHH). <sup>13</sup>C NMR (101 MHz, CDCl<sub>3</sub>)  $\delta$  198.0 (CHO), 164.3 (Ar-C<sub>q</sub>), 132.1 (2  $\times$  Ar-CH), 126.3 (Ar-C<sub>q</sub>), 114.2 (2  $\times$  Ar-CH), 74.1 (C<sub>q</sub>), 55.7 (CH<sub>3</sub>), 25.3 (2  $\times$  CH<sub>2</sub>), 24.4 (CH<sub>2</sub>), 22.0 (2  $\times$  CH<sub>2</sub>). HRMS (FTMS + p APCI) *m/z* calcd. For C<sub>14</sub>H<sub>19</sub>O<sub>4</sub>S [M+H]<sup>+</sup>: 283.0999; found: 283.0995.

Also prepared using silver mediated conditions according to general procedure **D** which afforded  $\alpha$ -sulfonyl aldehyde **3c** (48.1 mg, 43%).

**1-((4-(*tert*-Butyl)phenyl)sulfonyl)cyclohexane-1-carbaldehyde (3d)**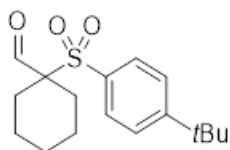

Prepared according to general procedure **C** using cyclohexane carboxaldehyde **1** (48  $\mu$ L, 0.4 mmol) and 4-(*tert*-butyl)benzenesulfinic acid sodium salt **52** (176 mg, 0.8 mmol). Purification by flash column chromatography (10% Et<sub>2</sub>O:pentane) afforded  $\alpha$ -sulfonyl aldehyde **3d** as a white solid (82.2 mg, 67%). *R*<sub>f</sub> 0.52 (20% Et<sub>2</sub>O:pent). m.p. = 98–101 °C. IR (film)/cm<sup>-1</sup> 2941, 2863, 1722 (C=O), 1595, 1454, 1312, 1148, 1111, 1085, 839, 733.

<sup>1</sup>H NMR (400 MHz, CDCl<sub>3</sub>)  $\delta$  9.66 (s, 1 H, CHO), 7.63 (d, *J* = 8.7 Hz, 2 H, 2  $\times$  Ar-CH), 7.54 (d, *J* = 8.7 Hz, 2 H, 2  $\times$  Ar-CH), 2.28 (d, *J* = 12.1 Hz, 2 H, 2  $\times$  C<sub>q</sub>CHH), 1.92 (ddd, *J* = 12.7, 12.7, 3.8 Hz, 2 H, 2  $\times$  C<sub>q</sub>CHH), 1.80–1.75 (m, 2 H, 2  $\times$  C<sub>q</sub>CH<sub>2</sub>CHH), 1.66–1.62 (m, 1 H, C<sub>q</sub>CH<sub>2</sub>CH<sub>2</sub>CHH), 1.34 (s, 9 H, C(CH<sub>3</sub>)<sub>3</sub>), 1.19–1.12 (m, 3 H, 2  $\times$  C<sub>q</sub>CH<sub>2</sub>CHH + C<sub>q</sub>CH<sub>2</sub>CH<sub>2</sub>CHH). <sup>13</sup>C NMR (101 MHz, CDCl<sub>3</sub>)  $\delta$  197.8 (CHO), 158.3 (Ar-C<sub>q</sub>), 132.0 (Ar-C<sub>q</sub>), 129.7 (2  $\times$  Ar-CH), 126.0 (2  $\times$  Ar-CH), 73.9 (C<sub>q</sub>), 35.3 (2  $\times$  C<sub>q</sub>C(CH<sub>3</sub>)<sub>3</sub>), 31.0 (3  $\times$  CH<sub>3</sub>), 25.1 (2  $\times$  CH<sub>2</sub>), 24.3 (CH<sub>2</sub>), 21.9 (2  $\times$  CH<sub>2</sub>). HRMS (TOF-ESI<sup>+</sup>) *m/z* calcd. For C<sub>17</sub>H<sub>25</sub>O<sub>3</sub>S [M+H]<sup>+</sup>: 309.1524; found 309.1528.

**1-((4-Fluorophenyl)sulfonyl)cyclohexane-1-carbaldehyde (3e)**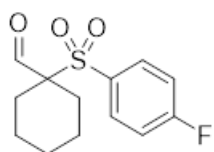

Prepared according to general procedure **C** using cyclohexane carboxaldehyde **1** (48  $\mu$ L, 0.4 mmol) and 4-fluorobenzenesulfinic acid sodium salt **53** (146 mg, 0.8 mmol). Purification by flash column chromatography (10–20% Et<sub>2</sub>O:pentane) afforded  $\alpha$ -sulfonyl aldehyde **3e** as a white solid (67.2 mg, 62%). *R*<sub>f</sub> 0.34 (20% Et<sub>2</sub>O:pentane).



m.p. = 106–107 °C. IR (film)/cm<sup>-1</sup> 2941, 2859, 1722 (C=O), 1592, 1320, 1144, 1088, 842, 663. <sup>1</sup>H NMR (400 MHz, CDCl<sub>3</sub>) δ 9.66 (s, 1 H, CHO), 7.74–7.71 (m, 2 H, 2 × Ar–CH), 7.25–7.21 (m, 2 H, 2 × Ar–CH), 2.27 (ddd, *J* = 13.5, 2.9, 1.5 Hz, 2 H, 2 × C<sub>q</sub>CHH), 1.91–1.88 (m, 2 H, 2 × C<sub>q</sub>CH<sub>2</sub>CHH), 1.81–1.76 (m, 2 H, 2 × C<sub>q</sub>CH<sub>2</sub>CHH), 1.64–1.63 (m, 1 H, C<sub>q</sub>CH<sub>2</sub>CH<sub>2</sub>CHH), 1.19–1.12 (m, 3 H, 2 × C<sub>q</sub>CH<sub>2</sub>CHH + C<sub>q</sub>CH<sub>2</sub>CH<sub>2</sub>CHH). <sup>13</sup>C NMR (101 MHz, CDCl<sub>3</sub>) δ 197.6 (CHO), 166.2 (d, <sup>1</sup>*J*<sub>C-F</sub> = 257.7 Hz, F–Ar–C<sub>q</sub>), 132.8 (d, <sup>3</sup>*J*<sub>C-F</sub> = 9.7 Hz, 2 × Ar–CH), 130.9 (d, <sup>4</sup>*J*<sub>C-F</sub> = 3.3 Hz, Ar–C<sub>q</sub>), 116.4 (d, <sup>2</sup>*J*<sub>C-F</sub> = 22.7 Hz, 2 × Ar–CH), 74.0 (C<sub>q</sub>), 25.2 (2 × CH<sub>2</sub>), 24.3 (CH<sub>2</sub>), 21.9 (2 × CH<sub>2</sub>). <sup>19</sup>F NMR (377 MHz, CDCl<sub>3</sub>) δ -102.14. HRMS (TOF–ESI<sup>+</sup>) *m/z* calcd. For C<sub>13</sub>H<sub>16</sub>O<sub>3</sub>SF [M+H]<sup>+</sup>: 271.0804; found: 271.0802.

### 1-((4-Chlorophenyl)sulfonyl)cyclohexane-1-carbaldehyde (3f)

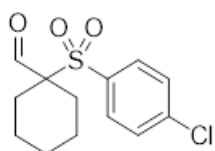

Prepared according to general procedure **C** using cyclohexane carboxaldehyde **1** (48 μL, 0.4 mmol) and 4-chlorobenzenesulfinic acid sodium salt **S4** (158 mg, 0.8 mmol). Purification by flash column chromatography (10–20% Et<sub>2</sub>O:pentane) afforded α-sulfonyl aldehyde **3f** as a white solid (73 mg, 64%). *R*<sub>f</sub> 0.34 (20% Et<sub>2</sub>O:pentane). m.p. = 85–87 °C. IR (film)/cm<sup>-1</sup> 2929, 2862, 1722 (C=O), 1580, 1472, 1312, 1148, 1048, 734. <sup>1</sup>H NMR (400 MHz, CDCl<sub>3</sub>) δ 9.66 (s, 1 H, CHO), 7.64 (d, *J* = 8.8 Hz, 2 H, 2 × Ar–CH), 7.53 (d, *J* = 8.8 Hz, 2 H, 2 × Ar–CH), 2.27 (d, *J* = 13.0 Hz, 2 H, 2 × C<sub>q</sub>CHH), 1.91 (ddd, *J* = 13.0, 12.3, 3.8 Hz, 2 H, 2 × C<sub>q</sub>CH<sub>2</sub>CHH), 1.82–1.76 (m, 2 H, 2 × C<sub>q</sub>CH<sub>2</sub>CHH), 1.67–1.64 (m, 1 H, C<sub>q</sub>CH<sub>2</sub>CH<sub>2</sub>CHH), 1.29–1.11 (m, 3 H, 2 × C<sub>q</sub>CH<sub>2</sub>CHH + C<sub>q</sub>CH<sub>2</sub>CH<sub>2</sub>CHH). <sup>13</sup>C NMR (101 MHz, CDCl<sub>3</sub>) δ 197.6 (CHO), 141.4 (Ar–C<sub>q</sub>), 133.3 (Ar–C<sub>q</sub>), 131.4 (2 × Ar–CH), 129.3 (2 × Ar–CH), 74.1 (C<sub>q</sub>), 25.2 (2 × CH<sub>2</sub>), 24.3 (CH<sub>2</sub>), 21.9 (2 × CH<sub>2</sub>). HRMS (TOF–ESI<sup>+</sup>) *m/z* calcd. For C<sub>13</sub>H<sub>14</sub>O<sub>3</sub>SCl [M-H]<sup>+</sup>: 285.0352; found: 285.0347.

### 1-((4-Bromophenyl)sulfonyl)cyclohexane-1-carbaldehyde (3g)

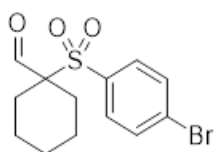

Prepared according to general procedure **C** using cyclohexane carboxaldehyde **1** (48 μL, 0.4 mmol) and 4-bromobenzenesulfinic acid sodium salt **2g** (194 mg, 0.8 mmol). Purification by flash column chromatography (20% Et<sub>2</sub>O:pentane) afforded α-sulfonyl aldehyde **3g** as a colourless oil (79.1 mg, 60% yield). *R*<sub>f</sub> 0.38 (10% Et<sub>2</sub>O:pentane). IR (film)/cm<sup>-1</sup> 2941, 2859, 1722 (C=O), 1573, 1454, 1390, 1315, 1148, 1070, 1010, 958, 783, 746. <sup>1</sup>H NMR (400 MHz, CDCl<sub>3</sub>) δ 9.66 (s, 1 H, CHO), 7.70 (d, *J* = 8.7 Hz, 2 H, 2 × Ar–CH), 7.56 (d, *J* = 8.7 Hz, 2 H, 2 × Ar–CH), 2.27 (d, *J* = 13.0 Hz, 2 H, 2 × C<sub>q</sub>CHH), 1.91 (ddd, *J* = 13.0, 13.0, 3.6 Hz, 2 H, 2 × C<sub>q</sub>CHH), 1.81–1.78 (m, 2 H, 2 × C<sub>q</sub>CH<sub>2</sub>CHH), 1.78–1.64 (m, 1 H, C<sub>q</sub>CH<sub>2</sub>CH<sub>2</sub>CHH), 1.20–1.12 (m, 3 H, 2 × C<sub>q</sub>CH<sub>2</sub>CHH + C<sub>q</sub>CH<sub>2</sub>CH<sub>2</sub>CHH). <sup>13</sup>C NMR (101 MHz, CDCl<sub>3</sub>) δ 197.5 (CHO), 133.8 (Ar–C<sub>q</sub>), 132.3 (2 × Ar–CH), 131.4 (2 × Ar–CH), 130.0 (Ar–C<sub>q</sub>), 74.1 (C<sub>q</sub>), 25.1 (2 × CH<sub>2</sub>), 24.3 (CH<sub>2</sub>), 21.9 (2 × CH<sub>2</sub>). HRMS (TOF–ESI<sup>+</sup>) *m/z* calcd. For C<sub>13</sub>H<sub>14</sub>O<sub>3</sub>SBr [M-H]<sup>+</sup>: 328.9854; found: 328.9847.

Also prepared using silver mediated conditions according to general procedure **D** which afforded α-sulfonyl aldehyde **3g** (42 mg, 32%).

### 1-((4-(Trifluoromethyl)phenyl)sulfonyl)cyclohexane-1-carbaldehyde (3h)

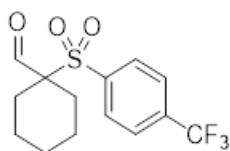

Prepared according to general procedure **C** using cyclohexane carboxaldehyde **1** (48 μL, 0.4 mmol) and 4-(trifluoromethyl)benzenesulfinic acid sodium salt **2h** (186 mg, 0.8 mmol). Purification by flash column chromatography (10% EtOAc:pentane) afforded α-sulfonyl aldehyde **3h** as a colourless oil (79.3 mg, 62% yield). *R*<sub>f</sub> 0.37 (10% EtOAc:pent). IR (film)/cm<sup>-1</sup> 2945, 2863, 1722 (C=O), 1405, 1319, 1133, 1110, 1062, 1017, 846, 708.

<sup>1</sup>H NMR (400 MHz, CDCl<sub>3</sub>) δ 9.69 (s, 1 H, CHO), 7.84 (d, *J* = 4.1 Hz, 4 H, 4 × Ar–CH), 2.27 (d, *J* = 13.0 Hz, 2 H, 2 × C<sub>q</sub>CHH), 1.94 (ddd, *J* = 13.0, 13.0, 4.3 Hz, 2 H, 2 × C<sub>q</sub>CHH), 1.83–1.79 (m, 2 H, 2 × C<sub>q</sub>CH<sub>2</sub>CHH), 1.66–1.65 (m, 1 H, C<sub>q</sub>CH<sub>2</sub>CH<sub>2</sub>CHH), 1.21–1.13 (m, 3 H, 2 × C<sub>q</sub>CH<sub>2</sub>CHH + C<sub>q</sub>CH<sub>2</sub>CH<sub>2</sub>CHH). <sup>13</sup>C NMR (101 MHz, CDCl<sub>3</sub>) δ 197.4 (CHO), 138.5 (Ar–C<sub>q</sub>), 136.0 (q, <sup>2</sup>*J*<sub>C-F</sub> = 33.4 Hz, Ar–C<sub>q</sub>), 130.7 (2 × Ar–CH), 126.1 (q, <sup>4</sup>*J*<sub>C-F</sub> = 3.7 Hz, 2 × Ar–CH), 125.5 (q, <sup>1</sup>*J*<sub>C-F</sub> = 227 Hz, CF<sub>3</sub>), 74.2 (C<sub>q</sub>), 25.2 (2 × CH<sub>2</sub>), 24.3 (CH<sub>2</sub>), 21.9 (2 × CH<sub>2</sub>). <sup>19</sup>F NMR (377 MHz, CDCl<sub>3</sub>) δ -63.27. HRMS (TOF–ESI<sup>+</sup>) *m/z* calcd. For C<sub>14</sub>H<sub>14</sub>O<sub>3</sub>SF<sub>3</sub> [M-H]<sup>+</sup>: 319.0616; found: 319.0623.

Also prepared using silver mediated conditions according to general procedure **D** which afforded  $\alpha$ -sulfonyl aldehyde **3h** (24.3 mg, 19%).

### 1-(Naphthalen-1-ylsulfonyl)cyclohexane-1-carbaldehyde (**3i**)

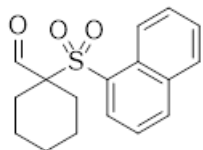

Prepared according to general procedure **C** using cyclohexane carboxaldehyde **1** (48  $\mu$ L, 0.4 mmol) and naphthene-1-sulfinic acid sodium salt **S9** (171 mg, 0.8 mmol). Purification by flash column chromatography (20% Et<sub>2</sub>O:pentane) afforded  $\alpha$ -sulfonyl aldehyde **3i** as an amorphous gum (27.5 mg, 23%). *R*<sub>f</sub> 0.23 (20% Et<sub>2</sub>O:pentane). IR (film)/cm<sup>-1</sup> 2937, 2859, 1718 (C=O), 1506, 1450, 1293, 1148, 1126, 958, 768, 675. <sup>1</sup>H NMR (400 MHz, CDCl<sub>3</sub>)  $\delta$  9.65 (d, *J* = 1.1 Hz, 1 H, CHO), 8.88 (dd, *J* = 8.7, 1.1 Hz, 1 H, Ar-CH), 8.16 (d, *J* = 8.2 Hz, 1 H, Ar-CH), 8.10 (dd, *J* = 7.5, 1.3 Hz, 1 H, Ar-CH), 7.95–7.93 (m, 1 H, Ar-CH), 7.68–7.65 (m, 1 H, Ar-CH), 7.63–7.57 (m, 2 H, 2  $\times$  Ar-CH), 2.31 (ddd, *J* = 13.0, 2.9, 1.5 Hz, 2 H, 2  $\times$  C<sub>q</sub>CHH), 2.00 (ddd, *J* = 13.0, 13.0, 4.4 Hz, 2 H, 2  $\times$  C<sub>q</sub>CH<sub>2</sub>CHH), 1.81–1.71 (m, 2 H, 2  $\times$  C<sub>q</sub>CH<sub>2</sub>CHH), 1.67–1.59 (m, 1 H, C<sub>q</sub>CH<sub>2</sub>CH<sub>2</sub>CHH), 1.26–1.10 (m, 3 H, 2  $\times$  C<sub>q</sub>CH<sub>2</sub>CHH + C<sub>q</sub>CH<sub>2</sub>CH<sub>2</sub>CHH). <sup>13</sup>C NMR (101 MHz, CDCl<sub>3</sub>)  $\delta$  197.3 (CHO), 136.2 (Ar-CH), 134.2 (Ar-C<sub>q</sub>), 133.6 (Ar-CH), 131.1 (Ar-C<sub>q</sub>), 130.5 (Ar-C<sub>q</sub>), 129.0 (Ar-CH), 128.7 (Ar-CH), 127.1 (Ar-CH), 125.2 (Ar-CH), 124.1 (Ar-CH), 75.8 (C<sub>q</sub>), 25.5 (2  $\times$  CH<sub>2</sub>), 24.4 (CH<sub>2</sub>), 22.0 (2  $\times$  CH<sub>2</sub>). HRMS (TOF-ESI<sup>+</sup>) *m/z* calcd. For C<sub>19</sub>H<sub>21</sub>O<sub>3</sub>NNaS [M+MeCN+Na]<sup>+</sup>: 366.1140; found: 366.1134.

### 1-(*o*-Tolylsulfonyl)cyclohexane-1-carbaldehyde (**3j**)

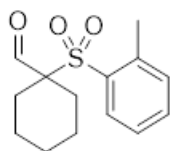

Prepared according to general procedure **C** using cyclohexane carboxaldehyde **1** (48  $\mu$ L, 0.4 mmol) and 2-methylbenzenesulfinic acid sodium salt **S11** (128 mg, 0.8 mmol). Purification by flash column chromatography (10–20% Et<sub>2</sub>O:pentane) afforded  $\alpha$ -sulfonyl aldehyde **3j** as a colourless oil (38.9 mg, 37%). *R*<sub>f</sub> 0.57 (20% Et<sub>2</sub>O:pentane). IR (film)/cm<sup>-1</sup> 2937, 2859, 1722 (C=O), 1454, 1312, 958, 805, 764, 689. <sup>1</sup>H NMR (400 MHz, CDCl<sub>3</sub>)  $\delta$  9.66 (s, 1 H, CHO), 7.73 (dd, *J* = 8.0, 1.4 Hz, 1 H, Ar-CH), 7.53 (ddd, *J* = 7.5, 1.4 Hz, 1 H, Ar-CH), 7.37–7.30 (m, 2 H, 2  $\times$  Ar-CH), 2.63 (s, 3 H, CH<sub>3</sub>), 2.34–2.29 (m, 2 H, 2  $\times$  C<sub>q</sub>CHH), 1.94–1.93 (m, 2 H, 2  $\times$  C<sub>q</sub>CH<sub>2</sub>CHH), 1.81–1.76 (m, 2 H, 2  $\times$  C<sub>q</sub>CH<sub>2</sub>CHH), 1.64–1.63 (m, 1 H, C<sub>q</sub>CH<sub>2</sub>CH<sub>2</sub>CHH), 1.29–1.13 (m, 3 H, 2  $\times$  C<sub>q</sub>CH<sub>2</sub>CHH + C<sub>q</sub>CH<sub>2</sub>CH<sub>2</sub>CHH). <sup>13</sup>C NMR (101 MHz, CDCl<sub>3</sub>)  $\delta$  197.8 (CHO), 140.2 (Ar-C<sub>q</sub>), 134.3 (Ar-CH), 133.4 (Ar-C<sub>q</sub>), 133.3 (Ar-CH), 132.6 (Ar-CH), 126.4 (Ar-CH), 75.4 (C<sub>q</sub>), 25.1 (2  $\times$  CH<sub>2</sub>), 24.4 (CH<sub>2</sub>), 22.0 (2  $\times$  CH<sub>2</sub>), 21.1 (CH<sub>3</sub>). HRMS (TOF-ESI<sup>+</sup>) *m/z* calcd. For C<sub>14</sub>H<sub>19</sub>O<sub>3</sub>S [M+H]<sup>+</sup>: 267.1055; found: 267.1054.

### 1-(Methylsulfonyl)cyclohexane-1-carbaldehyde (**3k**)

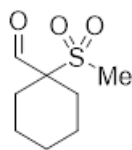

Prepared according to general procedure **C** using cyclohexane carboxaldehyde **1** (48  $\mu$ L, 0.4 mmol) and methanesulfinic acid sodium salt (81 mg, 0.8 mmol). Purification by flash column chromatography (5–20% Et<sub>2</sub>O:pentane) afforded  $\alpha$ -sulfonyl aldehyde **3k** a colourless oil (34.6 mg, 45%). *R*<sub>f</sub> 0.17 (20% Et<sub>2</sub>O:pentane). IR (film)/cm<sup>-1</sup> 2937, 3858, 1722 (C=O), 1453, 1293, 1133, 954, 752. <sup>1</sup>H NMR (400 MHz, CDCl<sub>3</sub>)  $\delta$  9.68 (s, 1 H, CHO), 2.76 (s, 3 H, CH<sub>3</sub>), 2.49 (d, *J* = 12.3 Hz, 2 H, 2  $\times$  C<sub>q</sub>CHH), 1.98–1.85 (m, 4 H, 2  $\times$  C<sub>q</sub>CHH + 2  $\times$  C<sub>q</sub>CH<sub>2</sub>CHH), 1.74–1.70 (m, 1 H, C<sub>q</sub>CH<sub>2</sub>CH<sub>2</sub>CHH), 1.25–1.20 (m, 3 H, 2  $\times$  C<sub>q</sub>CH<sub>2</sub>CHH + C<sub>q</sub>CH<sub>2</sub>CH<sub>2</sub>CHH). <sup>13</sup>C NMR (101 MHz, CDCl<sub>3</sub>)  $\delta$  199.3 (CHO), 72.8 (C<sub>q</sub>), 36.1 (CH<sub>3</sub>), 24.6 (2  $\times$  CH<sub>2</sub>), 24.2 (CH<sub>2</sub>), 21.9 (2  $\times$  CH<sub>2</sub>). HRMS (TOF-ESI<sup>+</sup>) *m/z* calcd. For C<sub>8</sub>H<sub>13</sub>O<sub>3</sub>S [M-H]<sup>+</sup>: 189.0585; found 189.0590

### 1-(Cyclopropylsulfonyl)cyclohexane-1-carbaldehyde (**3l**)

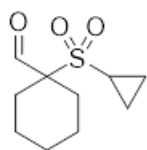

Prepared according to general procedure **C** using cyclohexane carboxaldehyde **1** (48  $\mu$ L, 0.4 mmol) and cyclopropanesulfinic acid sodium salt (102 mg, 0.8 mmol). Purification by flash column chromatography (30% Et<sub>2</sub>O:hexane) afforded  $\alpha$ -sulfonyl aldehyde **3l** as a colourless oil (47.5 mg, 55%). *R*<sub>f</sub> 0.14 (30% Et<sub>2</sub>O:hexane). IR (film)/cm<sup>-1</sup> 2937, 2858, 1722, 1453, 1315, 1289, 1133, 1189, 1043, 883, 831, 693. <sup>1</sup>H NMR (400 MHz, CDCl<sub>3</sub>)  $\delta$  9.66 (s, 1 H, CHO), 2.56 (d, *J* = 12.2 Hz, 2 H, 2  $\times$  C<sub>q</sub>CHH), 2.26 (tt, *J* = 8.0, 4.8 Hz, 1 H, SO<sub>2</sub>CH), 1.93 (ddd, *J* = 12.2, 12.2, 4.4 Hz, 2 H, 2  $\times$  C<sub>q</sub>CHH), 1.83 (m, 2 H, 2

$\times \text{C}_q\text{CH}_2\text{CHH}$ ), 1.68 (s, 1 H,  $\text{C}_q\text{CH}_2\text{CH}_2\text{CHH}$ ), 1.32–1.18 (m, 3 H,  $2 \times \text{C}_q\text{CH}_2\text{CHH} + \text{C}_q\text{CH}_2\text{CH}_2\text{CHH}$ ), 1.16 (m, 2 H,  $\text{SO}_2\text{CHCHHCHH}$ ), 1.06–0.98 (m, 2 H,  $\text{SO}_2\text{CHCHHCHH}$ ).  $^{13}\text{C}$  NMR (101 MHz,  $\text{CDCl}_3$ )  $\delta$  198.5 (CHO), 73.6 ( $\text{C}_q$ ), 26.2 ( $\text{SO}_2\text{CH}$ ), 24.8 ( $2 \times \text{CH}_2$ ), 24.4 ( $\text{CH}_2$ ), 21.9 ( $2 \times \text{CH}_2$ ), 4.8 ( $\text{SO}_2\text{CHCH}_2\text{CH}_2$ ). HRMS (TOF–ESI<sup>+</sup>)  $m/z$  calcd. For  $\text{C}_{10}\text{H}_{17}\text{O}_3\text{S}$   $[\text{M}+\text{H}]^+$ : 217.0898; found: 217.0894.

## Reaction Scope Varying the Aldehyde

Cycloheptane carboxaldehyde **S12**, cyclooctane carboxaldehyde **S13** and 4-phenylcyclohexane carboxaldehyde **S15** were all prepared as previously reported.<sup>6</sup>

### 1-(4-Methylbenzene-1-sulfonyl)cyclopentane-1-carbaldehyde (4a)

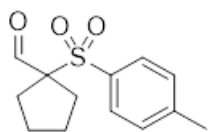

Prepared according to general procedure **C** using cyclopentanecarboxaldehyde (43  $\mu$ L, 0.4 mmol) and 4-methylbenzenesulfinic acid sodium salt **2a** (142 mg, 0.8 mmol). Purification by flash column chromatography afforded  $\alpha$ -sulfonyl aldehyde **4a** as a colourless oil (66.7 mg, 66%).  $R_f$  0.21 (20% Et<sub>2</sub>O:pentane). IR (film)/cm<sup>-1</sup> 2960, 2874, 1722 (C=O), 1595, 1450, 1304, 1144, 1088, 1047, 816, 715, 663. <sup>1</sup>H NMR (400 MHz, CDCl<sub>3</sub>)  $\delta$  9.77 (s, 1 H, CHO), 7.66 (d,  $J$  = 8.2 Hz, 2 H, 2  $\times$  Ar-CH), 7.34 (d,  $J$  = 8.2 Hz, 1 H, 2  $\times$  Ar-CH), 2.45 (s, 3 H, CH<sub>3</sub>), 2.30 (m, 2 H, 2  $\times$  C<sub>q</sub>CHH), 2.19–2.07 (m, 2 H, 2  $\times$  C<sub>q</sub>CHH), 1.89–1.75 (m, 2 H, 2  $\times$  C<sub>q</sub>CH<sub>2</sub>CHH), 1.64–1.50 (m, 2 H, 2  $\times$  C<sub>q</sub>CH<sub>2</sub>CHH). <sup>13</sup>C NMR (101 MHz, CDCl<sub>3</sub>)  $\delta$  194.7 (CHO), 145.5 (Ar-C<sub>q</sub>), 133.9 (Ar-C<sub>q</sub>), 129.9 (2  $\times$  Ar-CH), 129.1 (2  $\times$  Ar-CH), 81.1 (C<sub>q</sub>), 28.8 (2  $\times$  C<sub>q</sub>CH<sub>2</sub>CH<sub>2</sub>), 25.7 (2  $\times$  C<sub>q</sub>CH<sub>2</sub>CH<sub>2</sub>), 21.6 (CH<sub>3</sub>). HRMS (FTMS + p APCI)  $m/z$  calcd. For C<sub>13</sub>H<sub>17</sub>O<sub>3</sub>S [M+H]<sup>+</sup>: 253.0893; found 253.0885.

### 1-(4-Methylbenzene-1-sulfonyl)cycloheptane-1-carbaldehyde (5a)

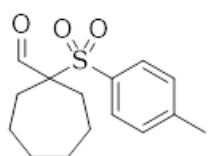

Prepared according to general procedure **C** using cycloheptanecarboxaldehyde **S12** (53  $\mu$ L, 0.4 mmol) and 4-methylbenzenesulfinic acid sodium salt **2a** (142 mg, 0.8 mmol). Purification by flash column chromatography (10–20% Et<sub>2</sub>O:pentane) afforded  $\alpha$ -sulfonyl aldehyde **5a** as a colourless oil (82.3 mg, 73%).  $R_f$  0.58 (20% Et<sub>2</sub>O:pentane). IR (film)/cm<sup>-1</sup> 2926, 2855, 1722 (C=O), 1595, 1461, 1290, 1141, 1085, 1040, 902, 816, 726. <sup>1</sup>H NMR (400 MHz, CDCl<sub>3</sub>)  $\delta$  9.65 (s, 1 H, CHO), 7.62 (d,  $J$  = 8.0 Hz, 2 H, 2  $\times$  Ar-CH), 7.34 (d,  $J$  = 8.0 Hz, 2 H, 2  $\times$  Ar-CH), 2.44 (s, 3 H, CH<sub>3</sub>), 2.23–2.16 (m, 4 H, 2  $\times$  C<sub>q</sub>CH<sub>2</sub>), 1.82–1.71 (m, 2 H, 2  $\times$  C<sub>q</sub>CH<sub>2</sub>CHH), 1.60–1.45 (m, 4 H, 2  $\times$  C<sub>q</sub>CH<sub>2</sub>CHH + 2  $\times$  C<sub>q</sub>CH<sub>2</sub>CH<sub>2</sub>CHH), 1.41–1.30 (m, 2 H, 2  $\times$  C<sub>q</sub>CH<sub>2</sub>CH<sub>2</sub>CHH). <sup>13</sup>C NMR (101 MHz, CDCl<sub>3</sub>)  $\delta$  196.5 (CHO), 145.5 (Ar-C<sub>q</sub>), 132.7 (Ar-C<sub>q</sub>), 129.8 (2  $\times$  Ar-CH), 129.7 (2  $\times$  Ar-CH), 77.2 (C<sub>q</sub>), 30.1 (2  $\times$  CH<sub>2</sub>), 27.9 (2  $\times$  CH<sub>2</sub>), 22.9 (2  $\times$  CH<sub>2</sub>), 21.6 (CH<sub>3</sub>). HRMS (FTMS–p APCI)  $m/z$  calcd. For C<sub>15</sub>H<sub>19</sub>O<sub>3</sub>S [M–H]<sup>–</sup>: 279.1049; found 279.1048.

### 1-(4-Methylbenzene-1-sulfonyl)cyclooctane-1-carbaldehyde (6a)

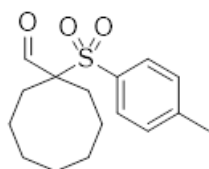

Prepared according to general procedure **C** using cyclooctanecarboxaldehyde **S13** (59  $\mu$ L, 0.4 mmol) and 4-methylbenzenesulfinic acid sodium salt **2a** (142 mg, 0.8 mmol). Purification by flash column chromatography afforded  $\alpha$ -sulfonyl aldehyde **6a** as a colourless oil (62.6 mg, 53%).  $R_f$  0.50 (20% Et<sub>2</sub>O:pentane). IR (film)/cm<sup>-1</sup> 2922, 2855, 1722 (C=O), 1594, 1476, 1446, 1300, 1144, 1084, 816, 712. <sup>1</sup>H NMR (400 MHz, CDCl<sub>3</sub>)  $\delta$  9.67 (s, 1 H, CHO), 7.61 (d,  $J$  = 8.2 Hz, 2 H, 2  $\times$  Ar-CH), 7.34 (d,  $J$  = 8.2 Hz, 2 H, 2  $\times$  Ar-CH), 2.45 (s, 3 H, CH<sub>3</sub>), 2.28 (ddd,  $J$  = 15.6, 9.0, 2.4 Hz, 2 H, 2  $\times$  C<sub>q</sub>CHH), 2.16 (ddd,  $J$  = 15.6, 9.2, 2.4 Hz, 2 H, 2  $\times$  C<sub>q</sub>CHH), 1.90–1.79 (m, 2 H, 2  $\times$  C<sub>q</sub>CH<sub>2</sub>CHH), 1.60–1.34 (m, 8 H, 2  $\times$  C<sub>q</sub>CH<sub>2</sub>CHH + 2  $\times$  C<sub>q</sub>CH<sub>2</sub>CH<sub>2</sub>CH<sub>2</sub> + C<sub>q</sub>CH<sub>2</sub>CH<sub>2</sub>CH<sub>2</sub>CH<sub>2</sub>). <sup>13</sup>C NMR (101 MHz, CDCl<sub>3</sub>)  $\delta$  197.5 (CHO), 145.5 (Ar-C<sub>q</sub>), 132.8 (Ar-C<sub>q</sub>), 129.72 (2  $\times$  Ar-CH), 129.68 (2  $\times$  Ar-CH), 77.5 (C<sub>q</sub>), 27.8 (2  $\times$  CH<sub>2</sub>), 24.7 (CH<sub>2</sub>), 23.7 (2  $\times$  CH<sub>2</sub>), 22.2 (2  $\times$  CH<sub>2</sub>), 21.7 (CH<sub>3</sub>). HRMS (FTMS–p APCI)  $m/z$  calcd. For C<sub>16</sub>H<sub>21</sub>O<sub>3</sub>S [M–H]<sup>–</sup>: 293.1206; found 293.1207.

### 1-(4-Methylbenzene-1-sulfonyl)cyclobutane-1-carbaldehyde (7a)

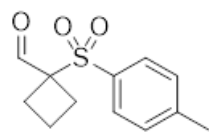

Prepared according to general procedure **C** using cyclobutanecarboxaldehyde (36  $\mu$ L, 0.4 mmol) and 4-methylbenzenesulfinic acid sodium salt **2a** (142 mg, 0.8 mmol). Purification by flash column chromatography afforded  $\alpha$ -sulfonyl aldehyde **7a** as a colourless oil (9.7 mg, 10%).  $R_f$  0.26 (20% Et<sub>2</sub>O:pentane). IR (film)/cm<sup>-1</sup> 2955, 2851, 1722 (C=O), 1595, 1315, 1252, 1316, 1156, 1118, 1080, 1039, 816, 664. <sup>1</sup>H NMR (400 MHz, CDCl<sub>3</sub>)  $\delta$  9.80 (s, 1 H, CHO), 7.66 (d,  $J$  = 8.4 Hz, 2 H, 2  $\times$  Ar-CH), 7.36–7.34 (m, 2 H, 2  $\times$  Ar-CH), 2.80–2.72 (m, 2 H, 2  $\times$  C<sub>q</sub>CHH), 2.45 (s, 3 H, CH<sub>3</sub>), 2.44–2.38 (m, 2 H, 2  $\times$  C<sub>q</sub>CHH), 2.09 (dt,  $J$  = 11.5, 10.0, 4.9 Hz, 1 H, C<sub>q</sub>CH<sub>2</sub>CHH), 1.88 (dt,  $J$  = 11.5, 10.0, 8.0 Hz, 1 H, C<sub>q</sub>CH<sub>2</sub>CHH). <sup>13</sup>C NMR (101 MHz, CDCl<sub>3</sub>)  $\delta$  193.5 (CHO), 145.6 (Ar-C<sub>q</sub>), 133.1 (Ar-C<sub>q</sub>), 130.1 (2  $\times$  Ar-CH), 128.7

(2 × Ar-CH), 72.2 (C<sub>q</sub>), 23.5 (2 × C<sub>q</sub>CH<sub>2</sub>), 21.7 (CH<sub>3</sub>), 14.5 (C<sub>q</sub>CH<sub>2</sub>CH<sub>2</sub>). HRMS (FTMS + p APCI) *m/z* calcd. For C<sub>12</sub>H<sub>15</sub>O<sub>3</sub>S [M+H]<sup>+</sup>: 239.0736; found 239.0729.

#### 4-(*tert*-Butyl)cyclohexane-1-carbaldehyde (**S14**)

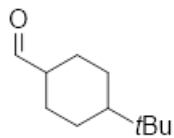

Procedure modified from Falck.<sup>7</sup> KOtBu (359 mg, 3.20 mmol) was added to a stirred solution of (methoxymethyl)triphenylphosphonium chloride (1.09 g, 3.20 mmol) in anhydrous THF (2 mL) at rt and the reaction was stirred for 1 h. A solution of 4-(*tert*-butyl)cyclohexan-1-one (308 mg, 2.00 mmol) in anhydrous THF (2 mL) was added dropwise to the dark red solution at 0 °C and then warmed to room temperature and stirred overnight. The reaction was quenched with addition of brine (5 mL) and the product extracted with EtOAc (3 × 20 mL), the combined organic layers were dried over Na<sub>2</sub>SO<sub>4</sub>, filtered and concentrated *in vacuo*. The intermediate enol ether was passed through a short pad of silica (10% Et<sub>2</sub>O:pentane) and concentrated *in vacuo*. The intermediate was dissolved in THF (4 mL) and 6 M aqueous HCl (1 mL) was added and the reaction stirred at rt for 2 h. Brine (5 mL) was added to reaction, and the product was extracted with EtOAc (3 × 20 mL), the combined organic layers were dried over Na<sub>2</sub>SO<sub>4</sub>, filtered, then concentrated *in vacuo*. Purification by column chromatography (0–10% Et<sub>2</sub>O:pentane) afforded aldehyde **S14** as a 1:2 mixture of *cis*- and *trans*-diastereomers as a colourless oil (203 mg, 60%). R<sub>f</sub> 0.55 (10% Et<sub>2</sub>O:pentane). IR (film)/cm<sup>-1</sup> 2941, 2859, 2706, 1722 (C=O), 1476, 1449, 1364, 924, 697.

*Cis*: <sup>1</sup>H NMR (400 MHz, CDCl<sub>3</sub>) δ 9.73 (s, 1 H, CHO), 2.45–2.37 (m, 1 H, CHOCH), 2.30 (ddd, *J* = 13.6, 3.5, 1.8 Hz, 2 H, 2 × CHH), 1.72–1.64 (m, 2 H, 2 × CHH), 1.53 (td, *J* = 12.9, 5.2 Hz, 2 H, 2 × CHH), 1.11–0.90 (m, 3 H, 2 × CHH + CHC(CH<sub>3</sub>)<sub>3</sub>), 0.81 (s, 9 H, C(CH<sub>3</sub>)<sub>3</sub>). <sup>13</sup>C NMR (101 MHz, CDCl<sub>3</sub>) δ 206.1 (CHO), 47.8 (CHOCH), 46.5 (CHC(CH<sub>3</sub>)<sub>3</sub>), 27.4 (C(CH<sub>3</sub>)<sub>3</sub>), 25.5 (2 × CH<sub>2</sub>), 24.1 (2 × CH<sub>2</sub>).

*Trans*: <sup>1</sup>H NMR (400 MHz, CDCl<sub>3</sub>) δ 9.62 (d, *J* = 1.7 Hz, 1 H, CHO), 2.14 (ttt, *J* = 12.2, 3.7, 1.7 Hz, 1 H, CHOCH), 2.05–2.00 (m, 2 H, 2 × CHH), 1.94–1.89 (m, 2 H, 2 × CHH), 1.29–1.19 (m, 2 H, 2 × CHH), 1.09–0.96 (m, 3 H, 2 × CHH + CHC(CH<sub>3</sub>)<sub>3</sub>), 0.86 (s, 9 H, C(CH<sub>3</sub>)<sub>3</sub>). <sup>13</sup>C NMR (101 MHz, CDCl<sub>3</sub>) δ 205.0 (CHO), 50.5 (CHOCH), 47.6 (CHC(CH<sub>3</sub>)<sub>3</sub>), 32.5 (C(CH<sub>3</sub>)<sub>3</sub>), 27.5 (C(CH<sub>3</sub>)<sub>3</sub>), 26.5 (2 × CH<sub>2</sub>), 26.2 (2 × CH<sub>2</sub>).

Analytical data (IR, <sup>1</sup>H NMR and <sup>13</sup>C NMR) is in agreement with the reported literature.<sup>8</sup>

#### 4-(*tert*-Butyl)-1-(4-methylbenzene-1-sulfonyl)cyclohexane-1-carbaldehyde (**8a**)

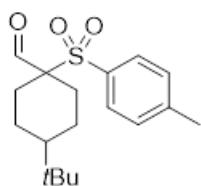

4-(*tert*-Butyl)cyclohexane-1-carboxaldehyde **S14** (70.8 mg, 0.4 mmol), manganese(IV) Oxide (52 mg, 0.6 mmol), copper(II) triflate (21.7 mg, 0.06 mmol), bathophenanthroline (13.3 mg, 0.04 mmol), 4-methylbenzenesulfinic acid sodium salt **2a** (142 mg, 0.8 mmol), water (200 μL), ethanol (200 μL) and acetic acid (200 μL, 4 mmol) were added sequentially to a microwave vial under air and the reaction was submerged in an oil bath preheated to

100 °C for 18 h. The reaction was allowed to cool to room temperature, diluted with EtOAc (2 mL) then filtered through silica eluting with EtOAc (3 × 10 mL) the concentrated *in vacuo*. Purification by flash column chromatography (20% Et<sub>2</sub>O:pentane) afforded α-sulfonyl aldehyde **8a** as white amorphous gum in an inseparable 1:1 mixture of *cis*- and *trans*-diastereomers (94.7 mg, 73%). R<sub>f</sub> 0.27 (20% Et<sub>2</sub>O:pentane). IR (film)/cm<sup>-1</sup> 2937, 2851, 1722 (C=O), 1443, 1297, 1141, 1085, 813. <sup>1</sup>H NMR (400 MHz, CDCl<sub>3</sub>) δ 9.63 (s, 1 H, CH<sub>a</sub>O), 9.62 (s, 1 H, CH<sub>b</sub>O), 7.64 (d, *J* = 8.4 Hz, 2 H, 2 × Ar-CH<sub>a/b</sub>), 7.58 (d, *J* = 8.4 Hz, 2 H, 2 × Ar-CH<sub>a/b</sub>), 7.33 (d, *J* = 7.3 Hz, 4 H, 4 × Ar-CH<sub>a/b</sub>), 2.44 (s, 3 H, C(H<sub>a/b</sub>)<sub>3</sub>), 2.43 (s, 3 H, C(H<sub>a/b</sub>)<sub>3</sub>), 2.42–2.31 (m, 4 H, 2 × C(H<sub>a/b</sub>)H<sub>a/b</sub>), 1.97–1.83 (m, 4 H, 2 × C(H<sub>a/b</sub>)H<sub>a/b</sub>), 1.83–1.76 (m, 2 H, 2 × C(H<sub>a/b</sub>)H), 1.69 (dt, *J* = 12.3, 3.7 Hz, 2 H, 2 × C(H<sub>a/b</sub>)H), 1.60 (ddd, *J* = 15.0, 13.2, 4.5 Hz, 2 H, 2 × C(H)H<sub>a/b</sub>), 1.04–0.92 (m, 3 H, 2 × C(H)H<sub>a/b</sub> + C(H<sub>a/b</sub>)tBu), 0.88 (s, 9 H, C(C(H<sub>a/b</sub>)<sub>3</sub>)), 0.85–0.80 (m, 1 H, C(H<sub>a/b</sub>)tBu), 0.78 (s, 9 H, C(C(H<sub>a/b</sub>)<sub>3</sub>)). <sup>13</sup>C NMR (101 MHz, CDCl<sub>3</sub>) δ 197.7 (CH<sub>a</sub>O), 196.2 (CH<sub>b</sub>O), 145.5 (2 × Ar-(C<sub>a/b</sub>)<sub>q</sub>), 133.2 (Ar-(C<sub>a/b</sub>)<sub>q</sub>), 132.2 (Ar-(C<sub>a/b</sub>)<sub>q</sub>), 129.9 (2 × Ar-(C<sub>a/b</sub>)H), 129.8 (2 × Ar-(C<sub>a/b</sub>)H), 129.6 (2 × Ar-(C<sub>a/b</sub>)H), 129.4 (2 × Ar-(C<sub>a/b</sub>)H), 73.9 (CHO(C<sub>a/b</sub>)<sub>q</sub>), 72.1 (CHO(C<sub>a/b</sub>)<sub>q</sub>), 46.44 ((C<sub>a/b</sub>)HtBu), 46.39 ((C<sub>a/b</sub>)HtBu), 32.5 (C<sub>a/b</sub>(CH<sub>3</sub>)<sub>3</sub>), 32.2 (C<sub>a/b</sub>(CH<sub>3</sub>)<sub>3</sub>), 27.4 (C(C<sub>a/b</sub>(H<sub>3</sub>)<sub>3</sub>)), 27.3 (C(C<sub>a/b</sub>(H<sub>3</sub>)<sub>3</sub>)), 26.2 (4 × (C<sub>a/b</sub>)H<sub>2</sub>), 25.7 (2 × (C<sub>a/b</sub>)H<sub>2</sub>), 23.1 (2 × (C<sub>a/b</sub>)H<sub>2</sub>), 21.7 (2 × Ar(C<sub>a/b</sub>)H<sub>3</sub>). HRMS (TOF-ESI<sup>+</sup>) *m/z* calcd. For C<sub>18</sub>H<sub>27</sub>O<sub>3</sub>S [M+H]<sup>+</sup>: 323.1681; found 323.1690.

#### 4-Phenyl-1-(4-methylbenzene-1-sulfonyl)cyclohexane-1-carbaldehyde (9a)

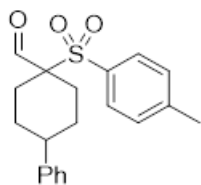

4-Phenylcyclohexane-1-carboxaldehyde **S15** (71.8 mg, 0.38 mmol), manganese(IV) oxide (52 mg, 0.6 mmol), copper(II) triflate (21.7 mg, 0.06 mmol), bathophenanthroline (13.3 mg, 0.04 mmol), 4-methylbenzenesulfinic acid sodium salt **2a** (142 mg, 0.8 mmol), water (200  $\mu$ L), ethanol (200  $\mu$ L) and acetic acid (200  $\mu$ L, 4 mmol) were combined sequentially to a microwave vial under air and heated to 100 °C for 18 h. The reaction was allowed to cool to room temperature, diluted with EtOAc (2 mL) then filtered through silica eluting with EtOAc (3  $\times$  10 mL) the concentrated *in vacuo*. Purification by flash column chromatography (20% Et<sub>2</sub>O:pentane) afforded  $\alpha$ -sulfonyl aldehyde **9a** as white amorphous gum in an inseparable 1:1 mixture of *cis*- and *trans*-diastereomers (51.7 mg, 40%). *R*<sub>f</sub> 0.14 (20% Et<sub>2</sub>O:pentane). IR (film)/cm<sup>-1</sup> 3056, 3026, 2930, 2862, 1722 (C=O), 1595, 1490, 1446, 1301, 1237, 1140, 1088, 816, 757, 701, 664 <sup>1</sup>H NMR (400 MHz, CDCl<sub>3</sub>)  $\delta$  9.76 (s, 1 H, CH<sub>a</sub>O), 9.71 (s, 1 H, CH<sub>b</sub>O), 7.69–7.64 (m, 3 H, 3  $\times$  Ar–CH<sub>a+b</sub>), 7.39–7.21 (m, 13 H, 13  $\times$  Ar–CH<sub>a/b</sub>), 7.13–7.11 (m, 2 H, 2  $\times$  Ar–CH<sub>a/b</sub>), 2.54–2.52 (m, 3 H, 2  $\times$  C<sub>q</sub>C(H<sub>a/b</sub>)H + PhCH<sub>a/b</sub>), 2.48 (s, 3 H, C(H<sub>a/b</sub>)<sub>3</sub>), 2.47 (s, 3 H, C(H<sub>a/b</sub>)<sub>3</sub>), 2.45–2.39 (m, 5 H, 2  $\times$  C<sub>q</sub>C(H<sub>a/b</sub>)H + 2  $\times$  C<sub>q</sub>C(H)H<sub>a/b</sub> + PhCH<sub>a+b</sub>), 2.15 (ddd, *J* = 13.6, 13.6, 4.1 Hz, 2 H, 2  $\times$  C<sub>q</sub>CH(H<sub>a/b</sub>)), 1.98–1.83 (m, 6 H, 2  $\times$  C<sub>q</sub>CH<sub>2</sub>C(H<sub>a/b</sub>)H + 2  $\times$  C<sub>q</sub>CH<sub>2</sub>CH(H<sub>a+b</sub>)), 1.41–1.37 (m, 2 H, 2  $\times$  C<sub>q</sub>CH<sub>2</sub>C(H<sub>a/b</sub>)H). <sup>13</sup>C NMR (101 MHz, CDCl<sub>3</sub>)  $\delta$  197.6 (C<sub>a/b</sub>HO), 196.4 (C<sub>a/b</sub>HO), 145.70 (Ar–(C<sub>a/b</sub>)<sub>q</sub>), 145.67 (Ar–(C<sub>a/b</sub>)<sub>q</sub>), 145.2 (Ar–(C<sub>a/b</sub>)<sub>q</sub>), 145.1 (Ar–(C<sub>a/b</sub>)<sub>q</sub>), 132.7 (Ar–(C<sub>a/b</sub>)<sub>q</sub>), 132.1 (Ar–(C<sub>a/b</sub>)<sub>q</sub>), 129.9 (2  $\times$  Ar–(C<sub>a/b</sub>)H), 129.8 (2  $\times$  Ar–(C<sub>a/b</sub>)H), 129.7 (2  $\times$  Ar–(C<sub>a/b</sub>)H), 129.5 (2  $\times$  Ar–(C<sub>a/b</sub>)H), 128.5 (3  $\times$  Ar–(C<sub>a/b</sub>)H), 127.0 (2  $\times$  Ar–(C<sub>a/b</sub>)H), 126.6 (2  $\times$  Ar–(C<sub>a/b</sub>)H), 126.5 (Ar–(C<sub>a/b</sub>)H), 126.3 (2  $\times$  Ar–(C<sub>a/b</sub>)H), 73.6 ((C<sub>a/b</sub>)<sub>q</sub>), 72.2 ((C<sub>a/b</sub>)<sub>q</sub>), 42.5 ((C<sub>a/b</sub>)HPh), 41.0 ((C<sub>a/b</sub>)HPh), 29.5 (2  $\times$  (C<sub>a/b</sub>)H<sub>2</sub>), 27.6 (2  $\times$  (C<sub>a/b</sub>)H<sub>2</sub>), 25.5 (2  $\times$  (C<sub>a/b</sub>)H<sub>2</sub>), 25.0 (2  $\times$  (C<sub>a/b</sub>)H<sub>2</sub>), 21.71 (Ar(C<sub>a/b</sub>)H<sub>3</sub>), 21.68 (Ar(C<sub>a/b</sub>)H<sub>3</sub>). HRMS (TOF–ESI<sup>+</sup>) *m/z* calcd. For C<sub>22</sub>H<sub>25</sub>NO<sub>3</sub>Na [M+MeCN+Na]<sup>+</sup>: 406.1453; found 406.1444.

#### 4-((Benzyloxy)methyl)cyclohexane-1-carbaldehyde (S16)

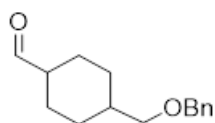

1,4-Cyclohexanedimethanol (720 mg, 5 mmol) in THF (5 mL) was added dropwise to a stirring solution of sodium hydride as a 60% dispersion in mineral oil (200 mg, 5 mmol) in THF (5 mL) and the resulting solution was stirred for 1 h at rt. Tetrabutylammonium iodide (928 mg, 2.5 mmol), and benzyl bromide (595 mL, 5 mmol) were added and the reaction was stirred overnight at rt then at 60 °C for 30 min. The reaction was quenched by the addition of water (10 mL) and the product was extracted with Et<sub>2</sub>O (3  $\times$  10 mL), dried over Na<sub>2</sub>SO<sub>4</sub>, filtered and then concentrated *in vacuo*. Purification by flash column chromatography (20% Et<sub>2</sub>O:pentane) afforded the mono-benzyl protected alcohol intermediate. CH<sub>2</sub>Cl<sub>2</sub> (100 mL) was added to mono-benzyl protected alcohol, then the reaction was cooled to 0 °C and Dess–Martin Periodinane (3.2 g, 5 mmol) was added and the reaction stirred for 1.5 h allowing to warm to rt. The reaction was quenched by the addition of a saturated solution of NaHCO<sub>3</sub> (aq) (100 mL) and the product was extracted with CH<sub>2</sub>Cl<sub>2</sub> (3  $\times$  50 mL), dried over Na<sub>2</sub>SO<sub>4</sub>, filtered then concentrated *in vacuo*. Purification by flash column chromatography afforded aldehyde **S16** as a colourless oil in an inseparable 1:2 mixture of *cis*- and *trans*-diastereomers (286.4 mg, 25% over 2 steps). *R*<sub>f</sub> 0.23 (10% Et<sub>2</sub>O:pentane). IR (film)/cm<sup>-1</sup> 2922, 2851, 2706, 1722 (C=O), 1450, 1360, 1092, 913, 734, 697. <sup>1</sup>H NMR (400 MHz, CDCl<sub>3</sub>)  $\delta$  9.69 (s, 1 H, CH<sub>a</sub>O), 9.62 (d, *J* = 1.6 Hz, 1 H, CH<sub>b</sub>O), 7.38–7.27 (m, 10 H, 10  $\times$  Ar–CH<sub>a/b</sub>), 4.50 (s, 2 H, OC(H<sub>b</sub>)<sub>2</sub>Ph), 4.48 (s, 2 H, OC(H<sub>a</sub>)<sub>2</sub>Ph), 3.30 (d, *J* = 6.4 Hz, 2 H, C(H<sub>b</sub>)<sub>2</sub>OBn), 3.26 (d, *J* = 6.3 Hz, 2 H, C(H<sub>a</sub>)<sub>2</sub>OBn), 2.42 (pent, *J* = 4.7 Hz, 1 H, CHOCH<sub>a</sub>), 2.19 (ttd, *J* = 12.3, 3.5, 1.6 Hz, 1 H, CHOCH<sub>b</sub>), 2.13–2.05 (m, 2 H, 2  $\times$  CHOCHC(H<sub>a</sub>)H), 2.05–1.90 (m, 4 H, 2  $\times$  C(H<sub>b</sub>)<sub>2</sub>), 1.77–1.66 (m, 3 H, CH<sub>a</sub>CH<sub>2</sub>OBn + 2  $\times$  CH(H<sub>a</sub>)CHCH<sub>2</sub>OBn), 1.65–1.58 (m, 3 H, 2  $\times$  CHOCHCH(H<sub>a</sub>) + CH<sub>b</sub>CH<sub>2</sub>OBn), 1.28 (qd, *J* = 12.9, 3.3 Hz, 2 H, 2  $\times$  CHOCHC(H<sub>b</sub>)H), 1.15–0.98 (m, 4 H, 2  $\times$  C(H<sub>a</sub>)HCHCH<sub>2</sub>OBn + 2  $\times$  CHOCHCH(H<sub>b</sub>)). <sup>13</sup>C NMR (101 MHz, CDCl<sub>3</sub>)  $\delta$  205.5 (CH<sub>a</sub>O), 204.6 (CH<sub>b</sub>O), 138.5 (Ar–(C<sub>a+b</sub>)<sub>q</sub>), 128.3 (2  $\times$  Ar–(C<sub>a+b</sub>)H), 127.5 (3  $\times$  Ar–(C<sub>a+b</sub>)H), 75.6 (CHO(C<sub>b</sub>)H), 74.9 (CHO(C<sub>a</sub>)H), 73.0 (O(C<sub>a+b</sub>)H<sub>2</sub>Ph), 50.4 ((C<sub>b</sub>)H<sub>2</sub>OBn), 47.3 ((C<sub>a</sub>)H<sub>2</sub>OBn), 37.7 ((C<sub>b</sub>)HCH<sub>2</sub>OBn), 36.8 ((C<sub>a</sub>)HCH<sub>2</sub>OBn), 28.7 (2  $\times$  (C<sub>b</sub>)H<sub>2</sub>), 26.4 (2  $\times$  (C<sub>a</sub>)H<sub>2</sub>), 25.5 (2  $\times$  (C<sub>b</sub>)H<sub>2</sub>), 23.7 (2  $\times$  (C<sub>a</sub>)H<sub>2</sub>). HRMS (ESI<sup>+</sup>) *m/z* calcd. For C<sub>15</sub>H<sub>21</sub>O<sub>2</sub> [M+H]<sup>+</sup>: 233.1542; found 233.1540.

#### 4-((Benzyloxy)methyl)-1-(4-methylbenzene-1-sulfonyl)cyclohexane-1-carbaldehyde (**10a**)

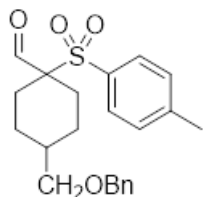

4-((Benzyloxy)methyl)cyclohexane-1-carbaldehyde **S16** (92.8 mg, 0.4 mmol), manganese(IV) oxide (52 mg, 0.6 mmol), copper(II) triflate (21.7 mg, 0.06 mmol), bathophenanthroline (13.3 mg, 0.04 mmol), 4-methylbenzenesulfinic acid sodium salt **2a** (142 mg, 0.8 mmol), water (200  $\mu$ L), ethanol (200  $\mu$ L) and acetic acid (200  $\mu$ L) were added sequentially to a microwave vial under air and the reaction was heated to 100 °C for 18 h. The reaction was allowed to cool to room temperature, diluted with EtOAc (2 mL) then

filtered through silica eluting with EtOAc (3  $\times$  10 mL) the concentrated *in vacuo*. Purification by flash column chromatography (20% Et<sub>2</sub>O:pentane) afforded  $\alpha$ -sulfonyl aldehyde **10a** as a colourless oil in an inseparable 1:1 mixture of *cis*- and *trans*-diastereomers (112.2 mg, 73%). *R*<sub>f</sub> 0.3 (30% Et<sub>2</sub>O:pentane). IR (film)/cm<sup>-1</sup> 2930, 2855, 1722 (C=O), 1453, 1300, 1144, 1085, 910, 730, 673. <sup>1</sup>H NMR (400 MHz, CDCl<sub>3</sub>)  $\delta$  9.65 (s, 1 H, CH<sub>a/b</sub>O), 9.64 (s, 1 H, CH<sub>a/b</sub>O), 7.61–7.58 (m, 4 H, 4  $\times$  Ar–CH<sub>a+b</sub>), 7.37–7.29 (m, 14 H, 14  $\times$  Ar–CH<sub>a+b</sub>), 4.53 (s, 2 H, OC(H<sub>a/b</sub>)<sub>2</sub>Ph), 4.45 (s, 2 H, OC(H<sub>a/b</sub>)<sub>2</sub>Ph), 3.46 (d, *J* = 7.0 Hz, 2 H, C(H<sub>a/b</sub>)<sub>2</sub>OBn), 3.20 (d, *J* = 6.4 Hz, 2 H, C(H<sub>a/b</sub>)<sub>2</sub>OBn), 2.45 (s, 6 H, C(H<sub>a+b</sub>)<sub>3</sub>), 2.34 (d, *J* = 13.3 Hz, 2 H, 2  $\times$  CHOC<sub>q</sub>CH<sub>a/b</sub>H), 2.14 (ddd, *J* = 14.5, 10.8, 4.1 Hz, 2 H, 2  $\times$  CHOC<sub>q</sub>CH<sub>a/b</sub>H), 2.01–1.81 (m, 9 H, 4  $\times$  C(H<sub>a/b</sub>)<sub>2</sub> + CH<sub>a/b</sub>CH<sub>2</sub>OBn), 1.65–1.62 (m, 1 H, CH<sub>a/b</sub>CH<sub>2</sub>OBn), 1.53–1.45 (m, 2 H, 2  $\times$  CHH<sub>a/b</sub>), 0.90–0.86 (m, 2 H, 2  $\times$  CHH<sub>a/b</sub>). <sup>13</sup>C NMR (101 MHz, CDCl<sub>3</sub>)  $\delta$  197.6 (CH<sub>a/b</sub>O), 197.1 (CH<sub>a/b</sub>O), 145.6 (2  $\times$  Ar–(C<sub>a/b</sub>)<sub>q</sub>), 138.33 (Ar–(C<sub>a/b</sub>)<sub>q</sub>), 138.29 (Ar–(C<sub>a/b</sub>)<sub>q</sub>), 132.1 (Ar–(C<sub>a/b</sub>)<sub>q</sub>), 132.0 (Ar–(C<sub>a/b</sub>)<sub>q</sub>), 129.9 (2  $\times$  Ar–(C<sub>a/b</sub>)<sub>H</sub>), 129.74 (2  $\times$  Ar–(C<sub>a/b</sub>)<sub>H</sub>), 129.69 (3  $\times$  Ar–(C<sub>a/b</sub>)<sub>H</sub>), 129.66 (2  $\times$  Ar–(C<sub>a/b</sub>)<sub>H</sub>), 128.40 (2  $\times$  Ar–(C<sub>a/b</sub>)<sub>H</sub>), 128.35 (2  $\times$  Ar–(C<sub>a/b</sub>)<sub>H</sub>), 127.60 (2  $\times$  Ar–(C<sub>a/b</sub>)<sub>H</sub>), 127.56 (Ar–(C<sub>a/b</sub>)<sub>H</sub>), 127.5 (2  $\times$  Ar–(C<sub>a/b</sub>)<sub>H</sub>), 74.7 (O(C<sub>a/b</sub>)H<sub>2</sub>Ph), 74.1 ((C<sub>a/b</sub>)<sub>q</sub>), 73.3 ((C<sub>a/b</sub>)<sub>q</sub>), 73.2 (O(C<sub>a/b</sub>)H<sub>2</sub>Ph), 73.0 ((C<sub>a/b</sub>)H<sub>2</sub>OBn), 71.4 ((C<sub>a/b</sub>)H<sub>2</sub>OBn), 36.6 ((C<sub>a/b</sub>)<sub>H</sub>), 32.7 ((C<sub>a/b</sub>)<sub>H</sub>), 25.4 (2  $\times$  (C<sub>a/b</sub>)H<sub>2</sub>), 24.8 (2  $\times$  (C<sub>a/b</sub>)H<sub>2</sub>), 23.1 (2  $\times$  (C<sub>a/b</sub>)H<sub>3</sub>), 21.7 (4  $\times$  (C<sub>a/b</sub>)H<sub>2</sub>). HRMS (ESI<sup>+</sup>) *m/z* calcd. For C<sub>22</sub>H<sub>26</sub>O<sub>4</sub>SN<sub>a</sub> [M+Na]<sup>+</sup>: 409.1450; found 409.1443.

#### Methyl 4-formyl-4-(4-methylbenzene-1-sulfonyl)cyclohexane-1-carboxylate (**11a**)

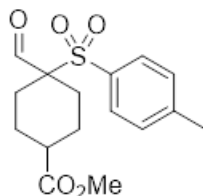

Methyl 4-formylcyclohexane-1-carboxylate (66.8 mg, 0.4 mmol), manganese(IV) oxide (52 mg, 0.6 mmol), copper(II) triflate (21.7 mg, 0.06 mmol), bathophenanthroline (13.3 mg, 0.04 mmol), 4-methylbenzenesulfinic acid sodium salt **2a** (142 mg, 0.8 mmol), water (200  $\mu$ L), ethanol (200  $\mu$ L) and acetic acid (200  $\mu$ L, 4 mmol) were combined sequentially to a microwave vial under air and heated to 100 °C for 18 h. The reaction was allowed to cool to room temperature, diluted with EtOAc (2 mL) then filtered through silica eluting with

EtOAc (3  $\times$  10 mL) the concentrated *in vacuo*. Purification by flash column chromatography (20% Et<sub>2</sub>O:pentane) afforded  $\alpha$ -sulfonyl aldehyde **11a** a colourless oil in an inseparable 1:1 mixture of *cis*- and *trans*-diastereomers (57.2 mg, 44%). *R*<sub>f</sub> 0.42 (20% Et<sub>2</sub>O:pentane). IR (film)/cm<sup>-1</sup> 2952, 2866, 1729 (C=O), 1595, 1453, 1304, 1200, 1148, 1051, 947, 820, 664. <sup>1</sup>H NMR (400 MHz, CDCl<sub>3</sub>)  $\delta$  9.68 (s, 1 H, CH<sub>a</sub>O), 9.65 (s, 1 H, CH<sub>b</sub>O), 7.60 (m, 4 H, 2  $\times$  Ar–CH<sub>a+b</sub>), 7.35 (m, 4 H, 2  $\times$  Ar–CH<sub>a+b</sub>), 3.72 (s, 3 H, CO<sub>2</sub>C(H<sub>a/b</sub>)<sub>3</sub>), 3.64 (s, 3 H, CO<sub>2</sub>C(H<sub>a/b</sub>)<sub>3</sub>), 2.57 (tt, *J* = 4.9, 3.6 Hz, 1 H, C(H<sub>a/b</sub>)CO<sub>2</sub>Me), 2.46 (s, 3 H, ArC(H<sub>a/b</sub>)<sub>3</sub>), 2.46 (s, 3 H, ArC(H<sub>a/b</sub>)<sub>3</sub>), 2.41–2.34 (m, 2 H, 2  $\times$  CH<sub>a/b</sub>H), 2.30–2.20 (m, 3 H, 2  $\times$  CHH<sub>a/b</sub> + C(H<sub>a/b</sub>)CO<sub>2</sub>Me), 2.15–2.09 (m, 4 H, 2  $\times$  CH<sub>a/b</sub>H + 2  $\times$  CHH<sub>a/b</sub>), 2.09–1.94 (m, 4 H, 2  $\times$  CH<sub>a/b</sub>H) + 2  $\times$  CHH<sub>a/b</sub>), 1.47–1.44 (m, 2 H, 2  $\times$  CH<sub>a/b</sub>H), 1.34–1.30 (m, 2 H, 2  $\times$  CHH<sub>a/b</sub>). <sup>13</sup>C NMR (101 MHz, CDCl<sub>3</sub>)  $\delta$  197.4 (CH<sub>a</sub>O), 197.0 (CH<sub>b</sub>O), 178.6 ((C<sub>a/b</sub>)=O<sub>ester</sub>), 173.9 ((C<sub>a/b</sub>)=O<sub>ester</sub>), 145.9 (Ar–(C<sub>a/b</sub>)<sub>q</sub>), 145.7 (Ar–(C<sub>a/b</sub>)<sub>q</sub>), 131.9 (2  $\times$  Ar–(C<sub>a/b</sub>)<sub>q</sub>), 129.9 (4  $\times$  (C<sub>a/b</sub>)<sub>Ar</sub>–H), 129.8 (2  $\times$  (C<sub>a/b</sub>)<sub>Ar</sub>–H), 129.7 (2  $\times$  (C<sub>a/b</sub>)<sub>Ar</sub>–H), 73.2 (2  $\times$  (C<sub>a/b</sub>)<sub>q</sub>), 52.0 (CO<sub>2</sub>(C<sub>a/b</sub>)H<sub>3</sub>), 51.8 (CO<sub>2</sub>(C<sub>a/b</sub>)H<sub>3</sub>), 41.3 ((C<sub>a/b</sub>)HCO<sub>2</sub>Me), 37.7 (C<sub>a/b</sub>)HCO<sub>2</sub>Me), 24.5 (2  $\times$  (C<sub>a+b</sub>)H<sub>2</sub>), 24.4 (2  $\times$  (C<sub>a+b</sub>)H<sub>2</sub>), 22.9 (2  $\times$  (C<sub>a+b</sub>)H<sub>2</sub>), 22.0 (2  $\times$  (C<sub>a+b</sub>)H<sub>2</sub>), 21.71 (Ar(C<sub>a/b</sub>)H<sub>3</sub>), 21.69 (Ar(C<sub>a/b</sub>)H<sub>3</sub>). HRMS (FTMS + p APCI) *m/z* calcd. For C<sub>16</sub>H<sub>21</sub>O<sub>5</sub>S [M+H]<sup>+</sup>: 325.1104; found 325.1094.

**4-(4-Methylbenzene-1-sulfonyl)tetrahydro-2H-pyran-4-carbaldehyde (12a)**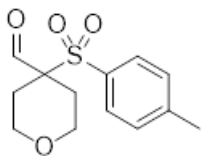

Tetrahydro-2H-pyran-4-carbaldehyde (48.7 mg, 0.4 mmol), manganese(IV) oxide (52 mg, 0.6 mmol), copper(II) triflate (21.7 mg, 0.06 mmol), bathophenanthroline (13.3 mg, 0.04 mmol), 4-methylbenzenesulfinic acid sodium salt **2a** (142 mg, 0.8 mmol), water (200  $\mu$ L), ethanol (200  $\mu$ L) and acetic acid (200  $\mu$ L) were combined sequentially to a microwave vial under air and heated to 100  $^{\circ}$ C for 18 h. The reaction was allowed to cool to room temperature, diluted with EtOAc (2 mL) then filtered through silica eluting with EtOAc (3  $\times$  10 mL) the concentrated *in vacuo*. Purification by flash column chromatography (40% Et<sub>2</sub>O:pentane) afforded  $\alpha$ -sulfonyl aldehyde **12a** as a colourless oil (46.4 mg, 43%). *R*<sub>f</sub> 0.02 (40% Et<sub>2</sub>O:pentane). IR (film)/cm<sup>-1</sup> 2967, 2829, 2862, 1722 (C=O), 1595, 1315, 1245, 1316, 1156, 1103, 950, 816, 664. <sup>1</sup>H NMR (400 MHz, CDCl<sub>3</sub>)  $\delta$  9.75 (s, 1 H, CHO), 7.62 (d, *J* = 8.4 Hz, 2 H, 2  $\times$  Ar-CH), 7.36 (d, *J* = 8.4 Hz, 2 H, 2  $\times$  Ar-CH), 3.96 (ddd, *J* = 12.3, 4.7, 1.3 Hz, 2 H, 2  $\times$  OCHH), 3.24 (ddd, *J* = 12.3, 12.3, 2.4 Hz, 2 H, 2  $\times$  OCHH), 2.46 (s, 3 H, CH<sub>3</sub>), 2.28 (td, *J* = 12.3, 5.4 Hz 2 H, 2  $\times$  OCH<sub>2</sub>CHH), 2.12 (dd, *J* = 13.5, 2.2 Hz, 2 H, 2  $\times$  OCH<sub>2</sub>CHH). <sup>13</sup>C NMR (101 MHz, CDCl<sub>3</sub>)  $\delta$  196.8 (CHO), 146.0 (Ar-C<sub>q</sub>), 131.5 (Ar-C<sub>q</sub>), 129.9 (4  $\times$  Ar-CH), 71.6 (C<sub>q</sub>), 63.7 (2  $\times$  CH<sub>2</sub>), 25.2 (2  $\times$  CH<sub>2</sub>), 21.7 (CH<sub>3</sub>). HRMS (EI<sup>+</sup>) *m/z* calcd. For C<sub>13</sub>H<sub>16</sub>O<sub>4</sub>S [M]<sup>+</sup>: 268.0769; found 268.0774.

**Benzyl 4-formyl-4-(4-methylbenzene-1-sulfonyl)piperidine-1-carboxylate (13a)**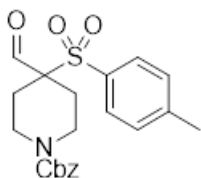

4-Formyl-N-Cbz-piperidine (101.4 mg, 0.41 mmol), manganese(IV) oxide (52 mg, 0.6 mmol), copper(II) triflate (21.7 mg, 0.06 mmol), bathophenanthroline (13.3 mg, 0.04 mmol), 4-methylbenzenesulfinic acid sodium salt **2a** (142 mg, 0.8 mmol), water (200  $\mu$ L), ethanol (200  $\mu$ L) and acetic acid (200  $\mu$ L) were combined sequentially to a microwave vial under air and heated to 100  $^{\circ}$ C for 18 h. The reaction was allowed to cool to room temperature, diluted with EtOAc (2 mL) then filtered through silica eluting with EtOAc (3  $\times$  10 mL) then concentrated *in vacuo*. Purification by flash column chromatography (10% acetone:pentane) afforded  $\alpha$ -sulfonyl aldehyde **13a** a colourless amorphous gum (74.2 mg, 44%). *R*<sub>f</sub> 0.11 (10% acetone:pentane). IR (film)/cm<sup>-1</sup> 3034, 2956, 2863, 1699 (C=O), 1595, 1431, 1319, 1282, 1237, 1148, 1088, 700, 667. <sup>1</sup>H NMR (400 MHz, CDCl<sub>3</sub>)  $\delta$  9.75 (s, 1 H, CHO), 7.60 (d, *J* = 8.4 Hz, 2 H, 2  $\times$  Ar-CH), 7.44–7.30 (m, 7 H, 7  $\times$  Ar-CH), 5.12 (s, 2 H, NCO<sub>2</sub>CH<sub>2</sub>), 4.21 (s, 2 H, 2  $\times$  CHH), 2.72 (s, 2 H, 2  $\times$  CHH), 2.47 (s, 3 H, CH<sub>3</sub>), 2.27–2.05 (m, 4 H, 2  $\times$  CH<sub>2</sub>). <sup>13</sup>C NMR (101 MHz, CDCl<sub>3</sub>)  $\delta$  196.6 (CHO), 154.8 (C=O<sub>carbamate</sub>), 146.2 (Ar-C<sub>q</sub>), 136.3 (Ar-C<sub>q</sub>), 131.5 (Ar-C<sub>q</sub>), 129.9 (2  $\times$  Ar-CH), 129.8 (2  $\times$  Ar-CH), 128.5 (2  $\times$  Ar-CH), 128.2 (Ar-CH), 128.0 (2  $\times$  Ar-CH), 72.4 (C<sub>q</sub>), 67.5 (OCH<sub>2</sub>Ph), 40.0 (CH<sub>2</sub>), 24.8 (CH<sub>2</sub>), 21.7 (CH<sub>3</sub>). HRMS (FTMS + p APCI) *m/z* calcd. For C<sub>21</sub>H<sub>24</sub>NO<sub>5</sub>S [M+H<sub>3</sub>O]<sup>+</sup>: 402.1370; found 402.1355.

**2-Methyl-2-(4-methylbenzene-1-sulfonyl)propanal (14a)**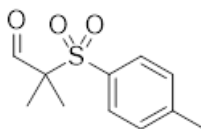

Prepared according to general procedure **C** using isobutyraldehyde (37  $\mu$ L, 0.4 mmol) and 4-methylbenzenesulfinic acid sodium salt **2a** (142 mg, 0.8 mmol). Purification by flash column chromatography (30% Et<sub>2</sub>O:pentane) afforded  $\alpha$ -sulfonyl aldehyde **14a** as white crystals (34.5 mg, 38%). *R*<sub>f</sub> 0.35 (30% Et<sub>2</sub>O:pentane). *m.p.* = 83–84  $^{\circ}$ C. IR (film)/cm<sup>-1</sup> 2986, 2937, 2848, 1729 (C=O), 1595, 1461, 1312, 1133, 1080, 916, 801, 715, 663. <sup>1</sup>H NMR (400 MHz, CDCl<sub>3</sub>)  $\delta$  9.80 (s, 1 H, CHO), 7.66 (d, *J* = 8.2 Hz, 2 H, 2  $\times$  Ar-CH), 7.36 (d, *J* = 8.2 Hz, 2 H, 2  $\times$  Ar-CH), 2.46 (s, 3 H, CH<sub>3</sub>), 1.46 (s, 6 H, C(CH<sub>3</sub>)<sub>2</sub>). <sup>13</sup>C NMR (101 MHz, CDCl<sub>3</sub>)  $\delta$  196.3 (CHO), 145.7 (Ar-C<sub>q</sub>), 132.2 (Ar-C<sub>q</sub>), 129.8 (2  $\times$  Ar-CH), 129.7 (2  $\times$  Ar-CH), 70.9 (C<sub>q</sub>), 21.7 (CH<sub>3</sub>), 16.7 (C(CH<sub>3</sub>)<sub>2</sub>). HRMS (FTMS + p APCI) *m/z* calcd. For C<sub>11</sub>H<sub>15</sub>O<sub>3</sub>S [M+H]<sup>+</sup>: 227.0736; found 227.0727.

Performed according to general procedure **C** using isobutyraldehyde (92.5 mL, 1 mmol) and 4-methylbenzenesulfinic acid sodium salt **2a** (355 mg, 2 mmol). Purification by flash column chromatography (30% Et<sub>2</sub>O:pentane) afforded  $\alpha$ -sulfonyl aldehyde **14a** as a white solid (162 mg, 71%).



Performed according to general procedure **C** using isobutyraldehyde (546 mL, 6 mmol) and 4-methylbenzenesulfinic acid sodium salt **2a** (2.14 g mg, 12 mmol). Purification by flash column chromatography (30% Et<sub>2</sub>O:pentane) afforded  $\alpha$ -sulfonyl aldehyde **14a** as a white solid (886 mg, 65%).

### 2-Methyl-2-(4-chlorobenzene-1-sulfonyl)propanal (**14f**)

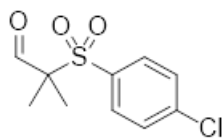

Prepared according to general procedure **C** using isobutyraldehyde (92.5  $\mu$ L, 1 mmol) and 4-chlorobenzenesulfinic acid sodium salt **54** (395 mg, 2 mmol). Purification by flash column chromatography (20% Et<sub>2</sub>O:pentane) afforded  $\alpha$ -sulfonyl aldehyde **14f** as a white solid (71 mg, 29%). *R*<sub>f</sub> 0.14 (30% Et<sub>2</sub>O:pentane). m.p. = 99–100 °C. IR (film)/cm<sup>-1</sup> 2986, 2937, 2848, 1729 (C=O), 1595, 1461, 1312, 1133, 1080, 916, 801, 715, 663. <sup>1</sup>H NMR (400 MHz, CDCl<sub>3</sub>)  $\delta$  9.78 (s, 1 H, CHO), 7.71 (d, *J* = 8.9 Hz, 2 H, 2  $\times$  Ar-CH), 7.54 (d, *J* = 8.9 Hz, 2 H, 2  $\times$  Ar-CH), 1.47 (s, 6 H, C(CH<sub>3</sub>)<sub>2</sub>). <sup>13</sup>C NMR (101 MHz, CDCl<sub>3</sub>)  $\delta$  195.8 (CHO), 141.5 (Ar-C<sub>q</sub>), 133.5 (Ar-C<sub>q</sub>), 131.1 (2  $\times$  Ar-CH), 129.5 (2  $\times$  Ar-CH), 70.9 (C<sub>q</sub>), 16.6 (C(CH<sub>3</sub>)<sub>2</sub>). HRMS (FTMS + p APCI) *m/z* calcd. For C<sub>10</sub>H<sub>12</sub>O<sub>3</sub>SCl [M+H]<sup>+</sup>: 247.0190; found 247.0188.

### 2-Methyl-2-(4-trifluoromethylbenzene-1-sulfonyl)propanal (**14h**)

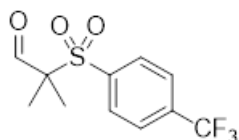

Prepared according to general procedure **C** using isobutyraldehyde (92.5  $\mu$ L, 1 mmol) and 4-(trifluoromethyl)benzenesulfinic acid sodium salt **2h** (464 mg, 2 mmol). Purification by flash column chromatography (20% Et<sub>2</sub>O:pentane) afforded  $\alpha$ -sulfonyl aldehyde **14h** as white solid (162 mg, 58%). *R*<sub>f</sub> 0.10 (20% Et<sub>2</sub>O:pentane). m.p. = 90–91 °C. IR (film)/cm<sup>-1</sup> 2982, 2945, 2847, 1743 (C=O), 1726, 1461, 1405, 1293, 1129, 838, 790, 742 <sup>1</sup>H NMR (400 MHz, CDCl<sub>3</sub>)  $\delta$  9.80 (s, 1 H, CHO), 7.93 (d, *J* = 8.2 Hz, 1 H, 2  $\times$  Ar-CH), 7.84 (d, *J* = 8.2 Hz, 1 H, 2  $\times$  Ar-CH), 1.50 (s, 6 H, C(CH<sub>3</sub>)<sub>2</sub>). <sup>13</sup>C NMR (101 MHz, CDCl<sub>3</sub>)  $\delta$  195.6 (CHO), 138.7 (Ar-C<sub>q</sub>), 136.1 (q, <sup>2</sup>*J*<sub>C-F</sub> = 33.2 Hz, Ar-C<sub>q</sub>), 130.4 (2  $\times$  Ar-CH), 126.3 (q, <sup>3</sup>*J*<sub>C-F</sub> = 3.8 Hz, 2  $\times$  Ar-CH), 125.7 (q, <sup>1</sup>*J*<sub>C-F</sub> = 270.0 Hz, CF<sub>3</sub>), 71.0 (C<sub>q</sub>), 16.6 (C(CH<sub>3</sub>)<sub>2</sub>). <sup>19</sup>F NMR (377 MHz, CDCl<sub>3</sub>)  $\delta$  -63.32. HRMS (EI<sup>+</sup>) *m/z* calcd. For C<sub>11</sub>H<sub>11</sub>O<sub>3</sub>F<sub>3</sub>S [M]<sup>+</sup>: 280.0376; found 280.0390.

### 2-Methyl-2-(4-methylbenzene-1-sulfonyl)butanal (**15a**)

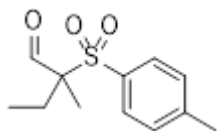

Prepared according to general procedure **C** using 2-methylbutyraldehyde (106  $\mu$ L, 1 mmol) and 4-methylbenzenesulfinic acid sodium salt **2a** (355 mg, 2 mmol). Purification by flash column chromatography (5–20% Et<sub>2</sub>O: Pentane) afforded  $\alpha$ -sulfonyl aldehyde **15a** as a yellow solid (176.6 mg, 73%). *R*<sub>f</sub> 0.31 (60% CH<sub>2</sub>Cl<sub>2</sub>:pentane). m.p. = 62–63 °C. IR (film)/cm<sup>-1</sup> 2944, 2978, 2885, 1730 (C=O), 1300, 1148, 1080, 820, 719. <sup>1</sup>H NMR (400 MHz, CDCl<sub>3</sub>)  $\delta$  9.74 (s, 1 H, CHO), 7.64 (d, *J* = 8.3 Hz, 2 H, 2  $\times$  Ar-CH), 7.35 (d, *J* = 8.3 Hz, 2 H, 2  $\times$  Ar-CH), 2.45 (s, 3 H, ArCH<sub>3</sub>), 2.33 (dq, *J* = 15.1, 7.6 Hz, 1 H, CHHCH<sub>3</sub>), 1.96 (dq, *J* = 15.1, 7.6 Hz, 1 H, CHHCH<sub>3</sub>), 1.35 (s, 3 H, CHOCCH<sub>3</sub>), 0.89 (t, *J* = 7.6 Hz, 3 H, CH<sub>2</sub>CH<sub>3</sub>). <sup>13</sup>C NMR (101 MHz, CDCl<sub>3</sub>)  $\delta$  196.8 (CHO), 145.6 (Ar-C<sub>q</sub>), 132.5 (Ar-C<sub>q</sub>), 129.8 (2  $\times$  Ar-CH), 129.7 (2  $\times$  Ar-CH), 74.5 (C<sub>q</sub>), 22.5 (ArCH<sub>3</sub>), 21.7 (CH<sub>3</sub>), 12.5 (CH<sub>2</sub>CH<sub>3</sub>), 7.9 (CH<sub>2</sub>CH<sub>3</sub>). HRMS (TOF-ESI<sup>+</sup>) *m/z* calcd. for C<sub>12</sub>H<sub>17</sub>O<sub>3</sub>S [M+H]<sup>+</sup>: 241.0898; found: 241.0903.

### 2-Ethyl-2-(4-methylbenzene-1-sulfonyl)butanal (**16a**)

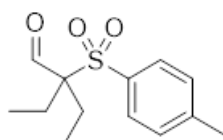

Prepared according to general procedure **C** using 2-ethylbutyraldehyde (49  $\mu$ L, 0.4 mmol) and 4-methylbenzenesulfinic acid sodium salt **2a** (142 mg, 0.8 mmol). Purification by flash column chromatography (20% Et<sub>2</sub>O:pentane) afforded  $\alpha$ -sulfonyl aldehyde **16a** as a colourless oil (49.5 mg, 49%). *R*<sub>f</sub> 0.35 (20% Et<sub>2</sub>O:pentane). IR (film)/cm<sup>-1</sup> 2974, 2945, 1726 (C=O), 1595, 1434, 1315, 1148, 1126, 1080, 816, 738. <sup>1</sup>H NMR (400 MHz, CDCl<sub>3</sub>)  $\delta$  9.68 (s, 1 H, CHO), 7.61 (d, *J* = 8.0 Hz, 1 H, 2  $\times$  Ar-CH), 7.35 (d, *J* = 8.0 Hz, 2 H, 2  $\times$  Ar-CH), 2.45 (s, 3 H, CH<sub>3</sub>), 2.03 (dq, *J* = 15.0, 7.6 Hz, 4 H, 2  $\times$  CH<sub>2</sub>), 1.00 (t, *J* = 7.6 Hz, 6 H, 2  $\times$  CH<sub>3</sub>). <sup>13</sup>C NMR (101 MHz, CDCl<sub>3</sub>)  $\delta$  197.5 (CHO), 145.5 (Ar-C<sub>q</sub>), 132.9 (Ar-C<sub>q</sub>), 129.8 (2  $\times$  Ar-CH), 129.4 (2  $\times$  Ar-CH), 21.7 (ArCH<sub>3</sub>), 19.0 (2  $\times$  CH<sub>2</sub>), 7.6 (2  $\times$  CH<sub>3</sub>). \* (EI<sup>+</sup>) *m/z* calcd. For C<sub>13</sub>H<sub>18</sub>O<sub>3</sub>Na [M+Na]<sup>+</sup>: 277.0874; found 277.0863. \*quaternary carbon adjacent to aldehyde is underneath chloroform peak.

**3-(Benzo[d][1,3]dioxol-5-yl)-2-methyl-2-(4-methylbenzene-1-sulfonyl)propanal (17a)**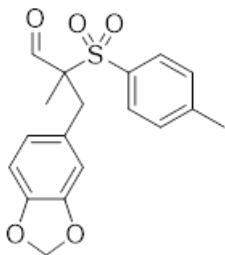

Manganese(IV) oxide (52 mg, 0.6 mmol), copper(II) triflate (21.7 mg, 0.06 mmol), bathophenanthroline (13.3 mg, 0.04 mmol), 4-methylbenzenesulfinic acid sodium salt **2a** (142 mg, 0.8 mmol), 2-Methyl-3-(3,4-methylenedioxyphenyl)propanal (66  $\mu$ L, 0.4 mmol), water (200  $\mu$ L), ethanol (200  $\mu$ L) and acetic acid (200  $\mu$ L) were combined sequentially to a microwave vial under air and heated to 100 °C for 18 h. The reaction was allowed to cool to room temperature, basified by the addition of a saturated solution of  $\text{NaHCO}_3$  (aq) (1 mL) and the product extracted with  $\text{CH}_2\text{Cl}_2$  (3  $\times$  10 mL), dried

over  $\text{Na}_2\text{SO}_4$ , filtered and then the concentrated *in vacuo*. [NOTE: When purifying this compound at this scale, a short plug of silica (5 cm in height in a 2.5 cm diameter column) was used and a rapid column was employed as product instability was observed.] Purification by flash column chromatography (30%  $\text{Et}_2\text{O}$ : pentane) afforded  $\alpha$ -sulfonyl aldehyde **17a** a yellow solid (67.8 mg, 49%).  $R_f$  0.16 (30%  $\text{Et}_2\text{O}$ :pentane) m.p. = 161–165 °C. IR (film)/ $\text{cm}^{-1}$  3053, 2900, 2777, 1714 (C=O), 1595, 1487, 1442, 1297, 1241, 1140, 872, 813, 727.  $^1\text{H}$  NMR (400 MHz,  $\text{CDCl}_3$ )  $\delta$  9.85 (s, 1 H, CHO), 7.66 (d,  $J$  = 8.4 Hz, 2 H, 2  $\times$  Ar–CH), 7.37 (d,  $J$  = 7.9 Hz, 2 H, 2  $\times$  Ar–CH), 6.69 (d,  $J$  = 8.5 Hz, 1 H, Ar–CH), 6.58–6.48 (m, 2 H, 2  $\times$  Ar–CH), 5.93 (d,  $J$  = 1.5 Hz, 1 H, OCHHO), 5.92 (d,  $J$  = 1.5 Hz, 1 H, OCHHO), 3.71 (d,  $J$  = 13.8 Hz, 1 H, CHHAr), 3.08 (d,  $J$  = 13.8 Hz, 1 H, CHHAr), 2.47 (s, 3 H,  $\text{C}_q\text{CH}_3$ ), 1.26 (s, 3 H,  $\text{CH}_3$ ).  $^{13}\text{C}$  NMR (101 MHz,  $\text{CDCl}_3$ )  $\delta$  196.4 (CHO), 147.7 (Ar– $\text{C}_q$ ), 147.0 (Ar– $\text{C}_q$ ), 145.8 (Ar– $\text{C}_q$ ), 132.2 (Ar– $\text{C}_q$ ), 129.9 (4  $\times$  Ar–CH), 126.8 (Ar– $\text{C}_q$ ), 123.7 (Ar–CH), 110.5 (Ar–CH), 108.4 (Ar–CH), 101.1 (OCH<sub>2</sub>O), 74.7 ( $\text{C}_q$ ), 35.0 ( $\text{CH}_3$ ), 21.7 ( $\text{CH}_2$ ), 13.5 ( $\text{C}_q\text{CH}_3$ ). HRMS (FTMS + p APCI)  $m/z$  calcd. For  $\text{C}_{18}\text{H}_{18}\text{O}_5\text{S}$   $[\text{M}]^{+*}$ : 346.0869; found 346.0868.

## Derivatisation of Sulfonyl Aldehydes

1-(4-Methoxyphenyl)-2-methyl-2-(4-methylphenylsulfonyl)propan-1-ol (**18**)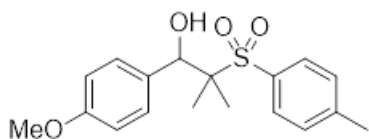

(4-Methoxyphenyl)magnesium bromide in THF (0.45 mL, 0.49 M) was added dropwise at 0 °C to a stirring solution of sulfonyl aldehyde **14a** (45 mg, 0.2 mmol) in THF (0.4 mL) and allowed to warm to rt overnight. the reaction was quenched by the addition of a saturated solution of  $\text{NH}_4\text{Cl}_{(\text{aq})}$  and the product extracted with  $\text{CH}_2\text{Cl}_2$  (3  $\times$  10 mL), dried over  $\text{Na}_2\text{SO}_4$ , filtered, then concentrated *in vacuo*. Purification by flash column chromatography (20%  $\text{Et}_2\text{O}$ :pentane) afforded alcohol **18** as a colourless oil (51.7 mg, 77%).  $R_f$  0.08 (20%  $\text{Et}_2\text{O}$ :pentane). IR (film)/ $\text{cm}^{-1}$  3448 (O–H), 2937, 1607, 1509, 1461, 1278, 1248, 1073, 1025, 865, 839, 780, 771, 686.  $^1\text{H}$  NMR (400 MHz,  $\text{CDCl}_3$ )  $\delta$  7.83 (d,  $J$  = 8.3 Hz, 2 H, 2  $\times$  Ar–CH), 7.42 (d,  $J$  = 8.3 Hz, 2 H, 2  $\times$  Ar–CH), 7.22 (d,  $J$  = 8.8 Hz, 2 H, 2  $\times$  Ar–CH), 6.84 (d,  $J$  = 8.8 Hz, 2 H, 2  $\times$  Ar–CH), 5.13 (s, 1 H, OH), 4.28 (d,  $J$  = 1.1 Hz, 1 H, OHCH), 3.79 (s, 3 H,  $\text{OCH}_3$ ), 2.49 (s, 3 H,  $\text{ArCH}_3$ ), 1.39 (s, 3 H,  $\text{CCH}_3(\text{CH}_3)$ ), 0.92 (s, 3 H,  $\text{CCH}_3(\text{CH}_3)$ ).  $^{13}\text{C}$  NMR (101 MHz,  $\text{CDCl}_3$ )  $\delta$  159.5 (Ar– $\text{C}_q$ ), 145.3 (Ar– $\text{C}_q$ ), 131.9 (Ar– $\text{C}_q$ ), 130.5 (2  $\times$  Ar–CH), 130.1 (Ar– $\text{C}_q$ ), 129.7 (2  $\times$  Ar–CH), 129.1 (2  $\times$  Ar–CH), 113.3 (2  $\times$  Ar–CH), 74.3 (OHCH), 66.6 ( $\text{C}_q$ ), 55.2 ( $\text{OCH}_3$ ), 21.7 ( $\text{CCH}_3(\text{CH}_3)$ ), 21.6 ( $\text{CCH}_3(\text{CH}_3)$ ), 13.8 ( $\text{ArCH}_3$ ). HRMS (FTMS–pAPCI)  $m/z$  calcd. For  $\text{C}_{18}\text{H}_{22}\text{O}_4\text{SNa}$   $[\text{M}+\text{Na}]^+$ : 357.1137; found 357.1139.

2-Methyl-2(4-methylbenzene-1-sulfonyl)propan-1-ol (**19**)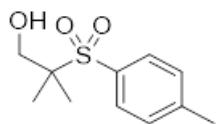

Sodium borohydride (23 mg, 0.6 mmol) was added to a stirred solution of **14a** (45 mg, 0.2 mmol) in ethanol (1 mL) at 0 °C. After 2 h, the reaction was quenched by the addition of water (10 mL), the product extracted from the aqueous phase with  $\text{CH}_2\text{Cl}_2$  (3  $\times$  10 mL) then dried over  $\text{Na}_2\text{SO}_4$ , filtered and concentrated *in vacuo* which afforded alcohol **19** as white crystals (23.7 mg, 52%).  $R_f$  0.09 (30%  $\text{Et}_2\text{O}$ :hexane). m.p. = 89–90 °C. IR (film)/ $\text{cm}^{-1}$  3503 (O–H), 2981, 2937, 2877, 1595, 1282, 1125, 1080, 816, 715, 682.  $^1\text{H}$  NMR (400 MHz,  $\text{CDCl}_3$ )  $\delta$  7.76 (d,  $J$  = 8.2 Hz, 2 H, 2  $\times$  Ar–CH), 7.38 (d,  $J$  = 8.2 Hz, 2 H, 2  $\times$  Ar–CH), 3.72 (s, 2 H,  $\text{CH}_2$ ), 2.48 (s, 3 H,  $\text{ArCH}_3$ ), 1.30 (s, 6 H,  $\text{C}(\text{CH}_3)_2$ ).  $^{13}\text{C}$  NMR (101 MHz,  $\text{CDCl}_3$ )  $\delta$  145.2 (Ar– $\text{C}_q$ ), 131.8 (Ar– $\text{C}_q$ ), 130.1 (2  $\times$  Ar–CH), 129.7 (2  $\times$  Ar–CH), 66.3 ( $\text{CH}_2$ ), 62.8 ( $\text{C}_q$ ), 21.6 ( $\text{ArCH}_3$ ), 19.2 ( $\text{C}(\text{CH}_3)_2$ ). HRMS (ESI $^+$ )  $m/z$  calcd. For  $\text{C}_{11}\text{H}_{17}\text{O}_3\text{S}$   $[\text{M}+\text{H}]^+$ : 229.0989; found 229.0904.

2-(2-(4-Methylphenylsulfonyl)propan-2-yl)-1H-benzo[d]imidazole (**20**)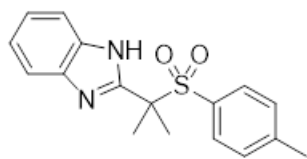

Using adapted procedure from Naali.<sup>9</sup> **14a** (45 mg, 0.2 mmol), *o*-phenylene diamine (22 mg, 0.2 mmol), CAN (11 mg, 0.02 mmol), MeCN (0.1 M) and  $\text{H}_2\text{O}_2$  (30% w/w in  $\text{H}_2\text{O}$ , 0.2 mL, 0.8 mmol) were added sequentially to a microwave vial under air, sealed and heated to 50 °C for 18 h. The reaction was diluted with water then the product was extracted with  $\text{CH}_2\text{Cl}_2$  (3  $\times$  10 mL), the organic phase was dried over  $\text{Na}_2\text{SO}_4$ , filtered then concentrated *in vacuo*. Purification by flash column chromatography (40%  $\text{Et}_2\text{O}$ :pentane) afforded benzimidazole **20** as yellow crystals (48.5 mg, 77%). m.p. = 210–211 °C.  $R_f$  0.08 (40%  $\text{Et}_2\text{O}$ :pentane). IR (film)/ $\text{cm}^{-1}$  3299 (N–H), 3034, 2989, 2963, 1621, 1520, 1443, 1416, 1155, 1282, 1121, 1073, 910, 816, 742, 712.  $^1\text{H}$  NMR (400 MHz,  $\text{CDCl}_3$ )  $\delta$  10.69 (s, 1 H, NH), 7.66 (d,  $J$  = 7.9 Hz, 1 H, Ar–CH), 7.52 (d,  $J$  = 7.9 Hz, 1 H, Ar–CH), 7.30 (d,  $J$  = 8.3 Hz, 2 H, 2  $\times$  Ar–CH), 7.25 (d,  $J$  = 8.0 Hz, 2 H, 2  $\times$  Ar–CH), 7.14 (d,  $J$  = 8.0 Hz, 2 H, 2  $\times$  Ar–CH), 2.35 (s, 3 H,  $\text{CH}_3$ ), 1.93 (s, 6 H,  $\text{C}(\text{CH}_3)_2$ ).  $^{13}\text{C}$  NMR (101 MHz,  $\text{CDCl}_3$ )  $\delta$  150.3 ( $\text{NC}_q\text{NH}$ ), 145.4 (Ar–CH), 142.1 (Ar– $\text{C}_q$ ), 134.4 (Ar– $\text{C}_q$ ), 131.0 (Ar–CH), 129.5 (4  $\times$  Ar–CH), 123.8 (Ar–CH), 122.3 (Ar–CH), 119.7 (Ar– $\text{C}_q$ ), 111.3 (Ar– $\text{C}_q$ ), 63.9 ( $\text{C}_q$ ), 21.6 ( $\text{CH}_3$ ), 21.4 ( $\text{C}(\text{CH}_3)_2$ ). HRMS (ESI $^+$ )  $m/z$  calcd. For  $\text{C}_{17}\text{H}_{19}\text{N}_2\text{O}_2\text{S}$   $[\text{M}+\text{H}]^+$ : 315.1167; found 315.1162.

**1-(2-(4-Methylbenzene-1-sulfonyl)propan-2-yl)-2,3,4,9-tetrahydro-1H-pyrido[3,4-b]indole (21)**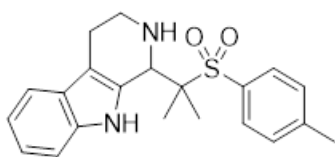

Using a method adapted from Chen.<sup>10</sup> Tryptamine (32 mg, 0.2 mmol), **14a** (45 mg, 0.2 mmol), CH<sub>2</sub>Cl<sub>2</sub> (0.32 mL) were added sequentially to a microwave vial, followed by trifluoroacetic acid (50  $\mu$ L) at rt. The reaction was monitored by TLC ( $\approx$ 2 h) after which the reaction was neutralised by the addition of a saturated aqueous solution of NaHCO<sub>3</sub> (1 mL) and the product was extracted with CH<sub>2</sub>Cl<sub>2</sub> (3  $\times$  5 mL), dried over Na<sub>2</sub>SO<sub>4</sub>, filtered and concentrated *in vacuo*. Purification by flash column chromatography (50–100% EtOAc: Pentane) afforded sulfone **21** as a yellow oil (17.5 mg, 24%). R<sub>f</sub> 0.5 (EtOAc). IR (film)/cm<sup>-1</sup> 3373 (N–H), 3056, 2986, 2933, 2840, 1621, 1461, 1282, 1148, 1118, 1073, 816, 738. <sup>1</sup>H NMR (400 MHz, CDCl<sub>3</sub>)  $\delta$  9.99 (s, 1 H, NH), 7.89–7.79 (d, *J* = 8.0 Hz, 2 H, 2  $\times$  Ar–CH), 7.52 (dd, *J* = 7.8, 1.1 Hz, 1 H, Ar–CH), 7.48–7.36 (m, 3 H, 3  $\times$  Ar–CH), 7.20 (ddd, *J* = 8.0, 7.0, 1.2 Hz, 1 H, Ar–CH), 7.15–7.07 (m, 1 H, Ar–CH), 4.79 (s, 1 H, CHNH), 3.23–3.13 (ddd, *J* = 12.3, 12.3, 5.3 Hz, 1 H, CH<sub>2</sub>CHHNH), 3.07 (ddd, *J* = 12.3, 6.7, 5.2 Hz, 1 H, CH<sub>2</sub>CHHNH), 2.77 (m, 2 H, CH<sub>2</sub>CH<sub>2</sub>NH), 2.48 (s, 3 H, CH<sub>3</sub>), 1.46 (s, 3 H, CH<sub>3</sub>), 1.25 (s, 3 H, CH<sub>3</sub>). <sup>13</sup>C NMR (101 MHz, CDCl<sub>3</sub>)  $\delta$  145.2 (Ar–C<sub>q</sub>), 135.4 (Ar–C<sub>q</sub>), 132.0 (Ar–C<sub>q</sub>), 131.2 (Ar–C<sub>q</sub>), 130.7 (2  $\times$  Ar–CH), 129.7 (2  $\times$  Ar–CH), 126.8 (Ar–C<sub>q</sub>), 121.8 (Ar–CH), 118.9 (Ar–CH), 117.9 (Ar–CH), 111.29 (Ar–CH), 111.25 (Ar–C<sub>q</sub>) 68.5 (C<sub>q</sub>), 53.3 (CHNH), 42.9 (CH<sub>2</sub>CH<sub>2</sub>NH), 22.5 (CH<sub>2</sub>CH<sub>2</sub>NH), 22.2 (CH<sub>3</sub>), 21.7 (CH<sub>3</sub>), 19.1 (CH<sub>3</sub>). HRMS (ESI<sup>+</sup>) *m/z* calcd. For C<sub>21</sub>H<sub>25</sub>O<sub>2</sub>S [M+H]<sup>+</sup>: 369.1637; found 369.1635.

**N-Hydroxy-2-methyl-2-(4-methylphenylsulfonyl)propanamide (22)**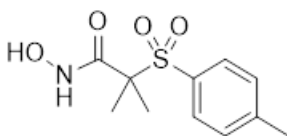

Using a method adapted from De Luca.<sup>11</sup> Sulfonyl aldehyde **14a** (45 mg, 0.2 mmol) was added to a stirring solution of *N*-hydroxysuccinimide (24 mg, 0.21 mmol) and diacetoxyiodobenzene (70.8 mg, 0.21 mmol) in MeCN (0.28 mL) at 0 °C and stirred for 2 h. Hydroxylamine hydrochloride (50% w/w in H<sub>2</sub>O, 0.4 mmol) was added and the reaction stirred overnight at rt. The reaction was concentrated *in vacuo*. Purification by flash column chromatography (20% Et<sub>2</sub>O: pentane) afforded hydroxamic acid **22** as a white powder (15.9 mg, 31%). m.p. = 145–150 °C. R<sub>f</sub> 0.20 (20% Et<sub>2</sub>O: pentane). IR (film)/cm<sup>-1</sup> 3396 (O–H), 3045, 2989, 2937, 1595, 1409, 1274, 1151, 1125, 1080, 968, 842, 812, 715. <sup>1</sup>H NMR (400 MHz, CDCl<sub>3</sub>)  $\delta$  7.68 (d, *J* = 8.3 Hz, 2 H, 2  $\times$  Ar–CH), 7.55 (s, 1 H, OH), 7.35 (m, 3 H, NH + 2  $\times$  Ar–CH), 2.46 (s, 3 H, CH<sub>3</sub>), 1.50 (s, 6 H, C(CH<sub>3</sub>)<sub>2</sub>). <sup>13</sup>C NMR (101 MHz, CDCl<sub>3</sub>)  $\delta$  150.1 (C=O), 145.1 (Ar–C<sub>q</sub>), 131.9 (Ar–C<sub>q</sub>), 130.3 (2  $\times$  Ar–CH), 129.4 (2  $\times$  Ar–CH), 63.8 (C<sub>q</sub>), 21.7 (CH<sub>3</sub>), 19.4 (C(CH<sub>3</sub>)<sub>2</sub>). HRMS (FTMS–pAPCI) *m/z* calcd. For C<sub>11</sub>H<sub>16</sub>NO<sub>4</sub>S [M+H]<sup>+</sup>: 258.0795; found 258.0805.

**1-(4-Methylphenylsulfonyl)cyclohexane-1-carboxylic acid (23)**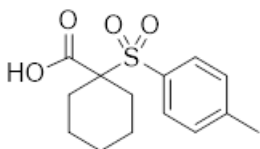

Using method adapted from Montanari.<sup>12</sup> Hydrogen peroxide (30% w/w in H<sub>2</sub>O, 102  $\mu$ L, 1 mmol) and NaH<sub>2</sub>PO<sub>4</sub> (261.8 mg, 2.2 mmol) in H<sub>2</sub>O (1 mL) were added to a stirring solution of sulfonyl aldehyde **14a** (133 mg, 0.5 mmol) in MeCN (4 mL). NaClO<sub>2</sub> (180 mg, 2 mmol) in H<sub>2</sub>O (1.6 mL) was added to the stirring solution at 0 °C. The reaction was stirred for 1.5 h, allowing the solution to slowly warm to rt. Na<sub>2</sub>S<sub>2</sub>O<sub>3</sub> was added to quench any unreacted NaClO<sub>2</sub> and H<sub>2</sub>O<sub>2</sub>, then the reaction was acidified by the addition of aqueous 1 M HCl and the product extracted with EtOAc (3  $\times$  10 mL) and concentrated *in vacuo* to afford sulfonyl acid **23** as a white solid (124.4 mg, 88%). m.p. = 175–179 °C. IR (film)/cm<sup>-1</sup> 3045, 2937, 2858, 2546 (O–H, br), 1692 (C=O), 1595, 1312, 1264, 1148, 973, 820, 715. <sup>1</sup>H NMR (400 MHz, CDCl<sub>3</sub>)  $\delta$  7.72 (d, *J* = 8.3 Hz, 2 H, 2  $\times$  Ar–CH), 7.35 (d, *J* = 8.3 Hz, 2 H, 2  $\times$  Ar–CH), 2.46 (s, 3 H, CH<sub>3</sub>), 2.36 (d, *J* = 13.0 Hz, 2 H, 2  $\times$  C<sub>q</sub>CHH), 1.93–1.80 (m, 4 H, 2  $\times$  C<sub>q</sub>CHH + 2  $\times$  C<sub>q</sub>CH<sub>2</sub>CHH), 1.69 (d, *J* = 11.6 Hz, 1 H, C<sub>q</sub>CH<sub>2</sub>CH<sub>2</sub>CHH), 1.39–1.15 (m, 3 H, 2  $\times$  C<sub>q</sub>CH<sub>2</sub>CHH + C<sub>q</sub>CH<sub>2</sub>CH<sub>2</sub>CHH). <sup>13</sup>C NMR (101 MHz, CDCl<sub>3</sub>)  $\delta$  172.3 (C=O), 145.5 (Ar–C<sub>q</sub>), 131.9 (Ar–C<sub>q</sub>), 130.4 (2  $\times$  Ar–CH), 129.5 (2  $\times$  Ar–CH), 74.0 (C<sub>q</sub>), 28.1 (2  $\times$  CH<sub>2</sub>), 24.5 (CH<sub>2</sub>), 23.0 (2  $\times$  CH<sub>2</sub>), 21.7 (CH<sub>3</sub>). HRMS (FTMS–pAPCI) *m/z* calcd. For C<sub>14</sub>H<sub>17</sub>O<sub>4</sub>S [M–H]<sup>–</sup>: 281.0842; found 281.0851.

## Gram Scale Synthesis

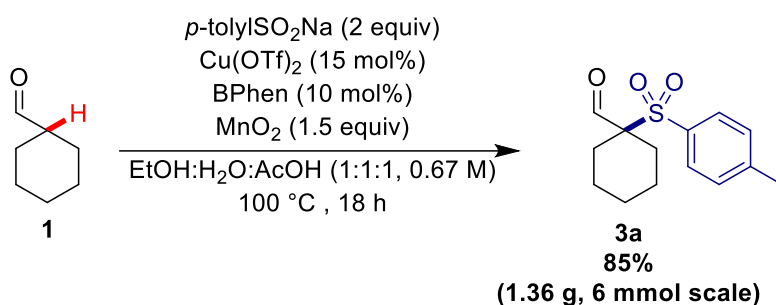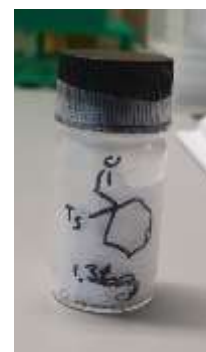

Manganese(IV) oxide (786.2 mg, 9 mmol), copper(II) triflate (324.7 mg, 0.9 mmol), Bathophenanthroline (199.2 mg, 0.6 mmol), 4-methylbenzenesulfinic acid sodium salt **2a** (2.14 g, 12 mmol), cyclohexane carboxaldehyde (726  $\mu\text{L}$ , 6 mmol),  $\text{H}_2\text{O}$  (3 mL), EtOH (3 mL) and AcOH (3 mL) were added sequentially to a 25 mL microwave vial under air, sealed and submerged in an oil bath preheated to 100  $^\circ\text{C}$  for 18 h so that the level of the oil was the same as the level of the solvent in the reaction. [NOTE: in the course of the reaction, a white precipitate forms early in the reaction ( $\approx 1$  h) which can interfere with stirring, an increased stirring rate (1000 rpm) was employed to ensure constant stirring. In the majority of cases, the precipitate re-dissolves over the course of the reaction.]. The reaction was allowed to cool to room temperature, diluted with EtOAc (10 mL), filtered through silica eluting with EtOAc ( $3 \times 10$  mL) then concentrated *in vacuo*. Purification by flash column chromatography (5–20%  $\text{Et}_2\text{O}$ :pentane) afforded  $\alpha$ -sulfonyl aldehyde **3a** as a yellow solid (1.36 g, 85%).

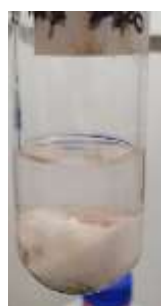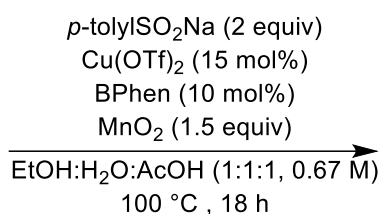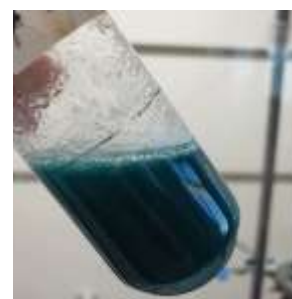

From left to right: Reaction mixture after addition of aldehyde and solvents. Reaction mixture after heating to 100  $^\circ\text{C}$  for 18 h.

## **$^1\text{H}$ and $^{13}\text{C}$ Spectra of Selected Compounds**

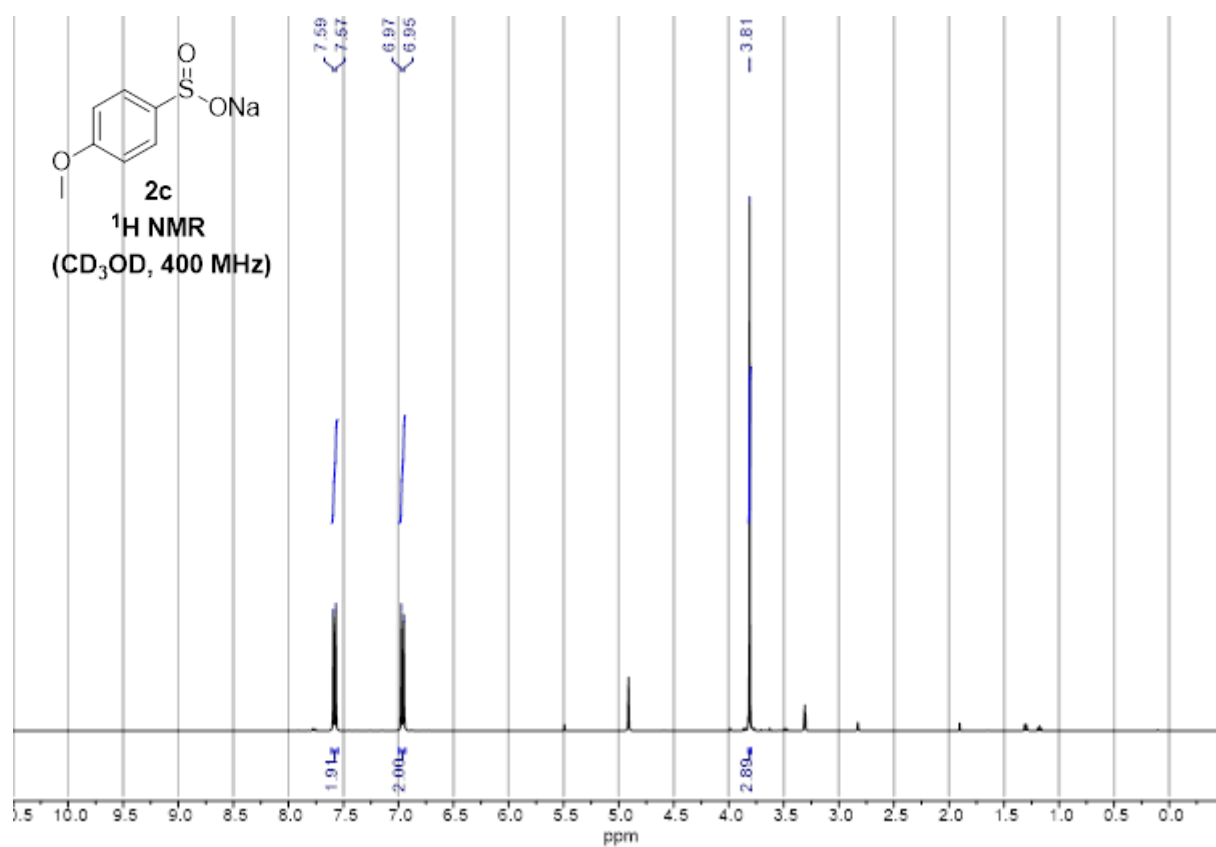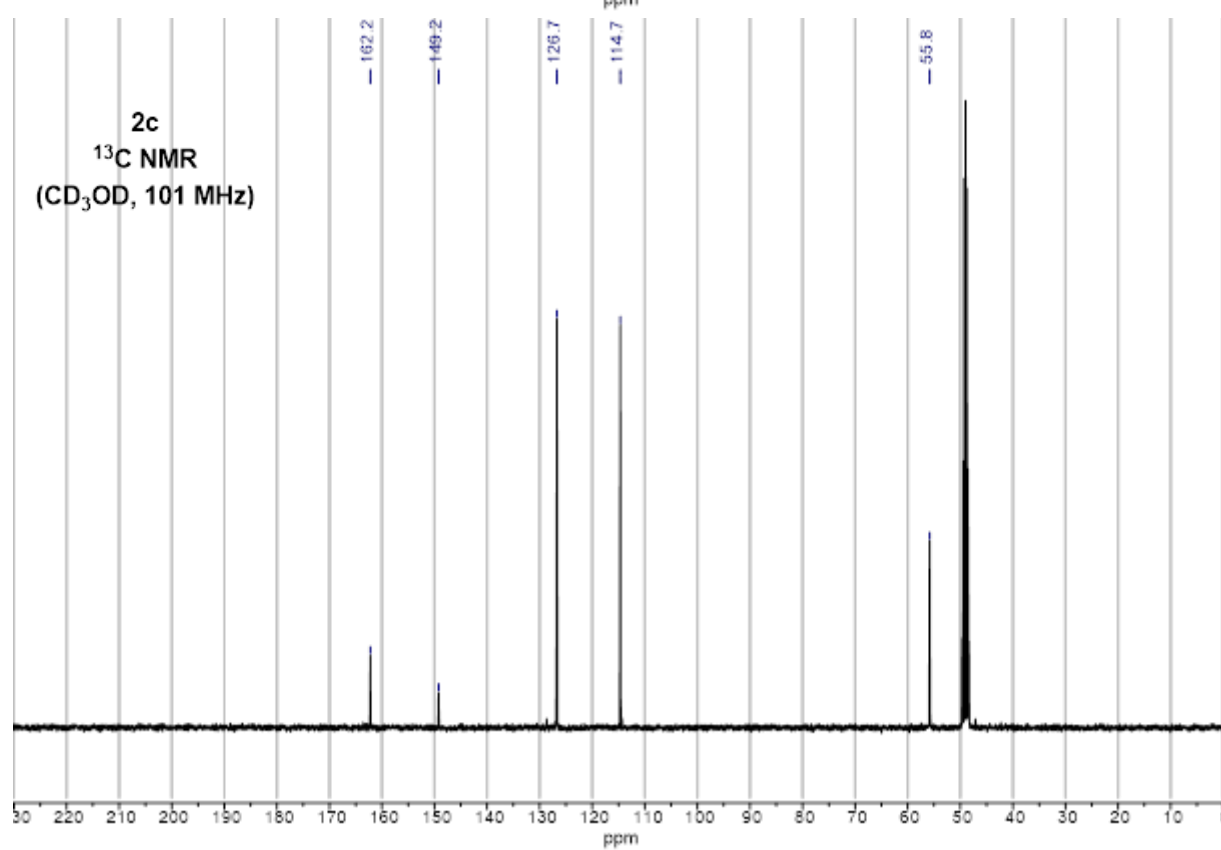

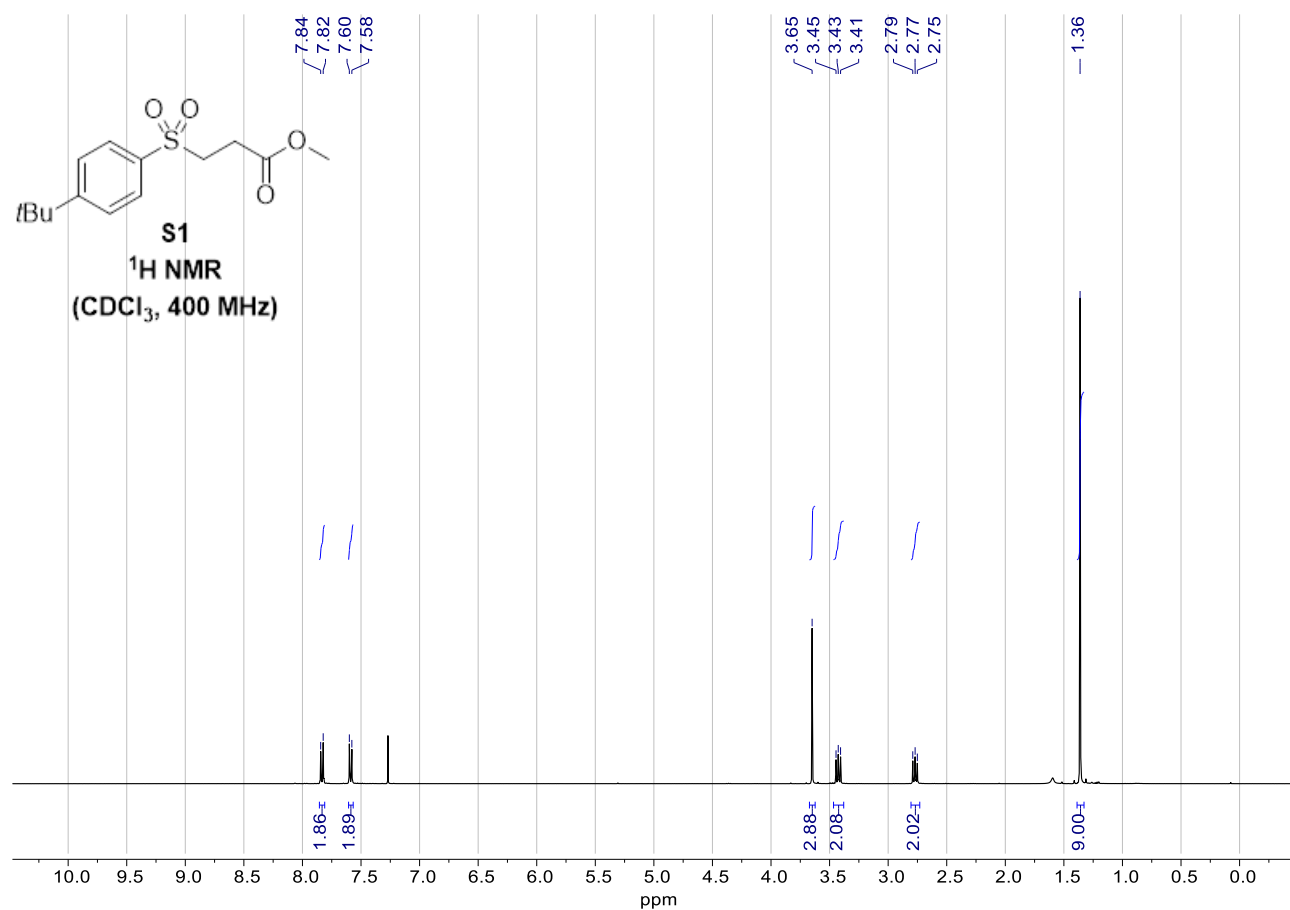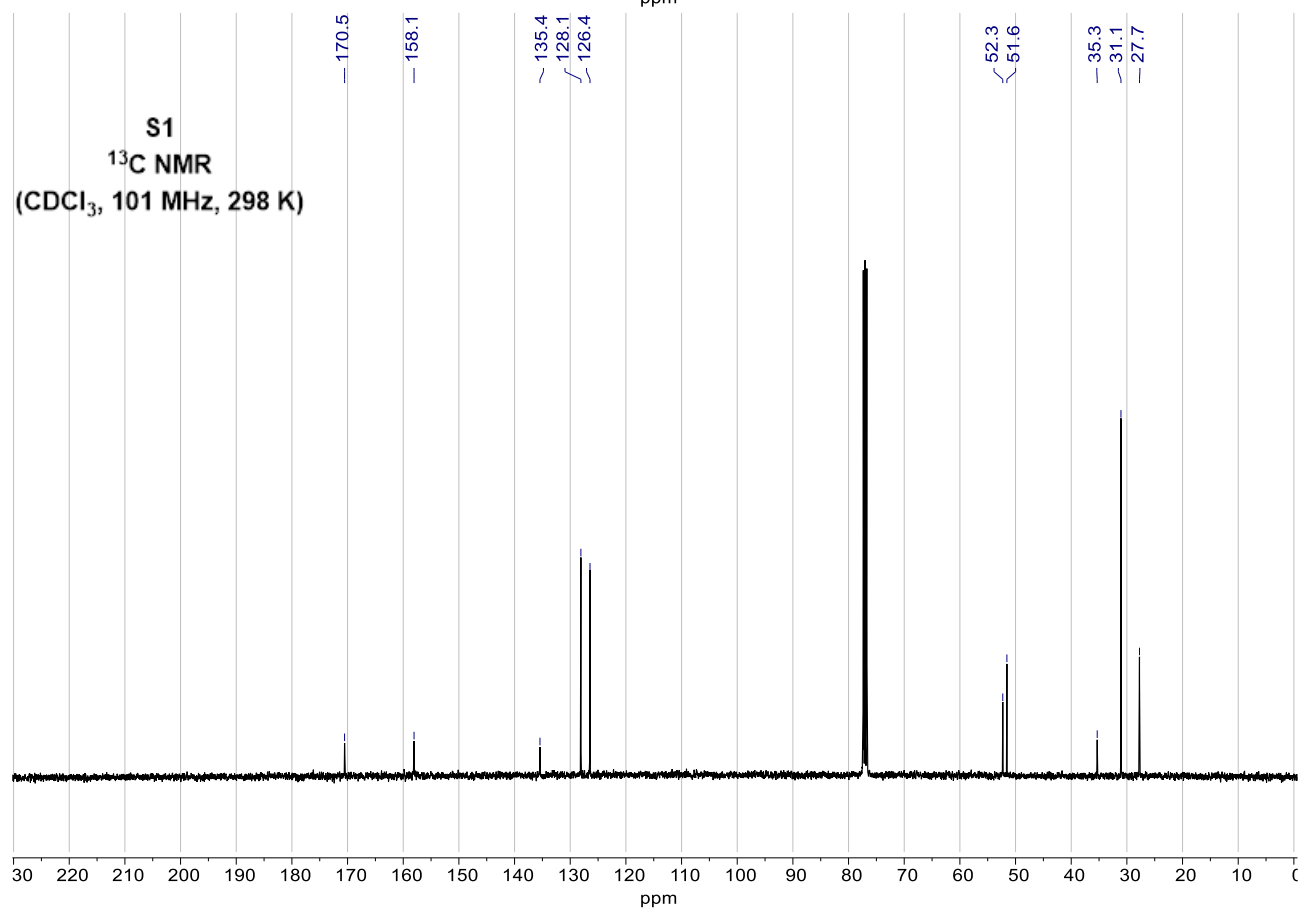



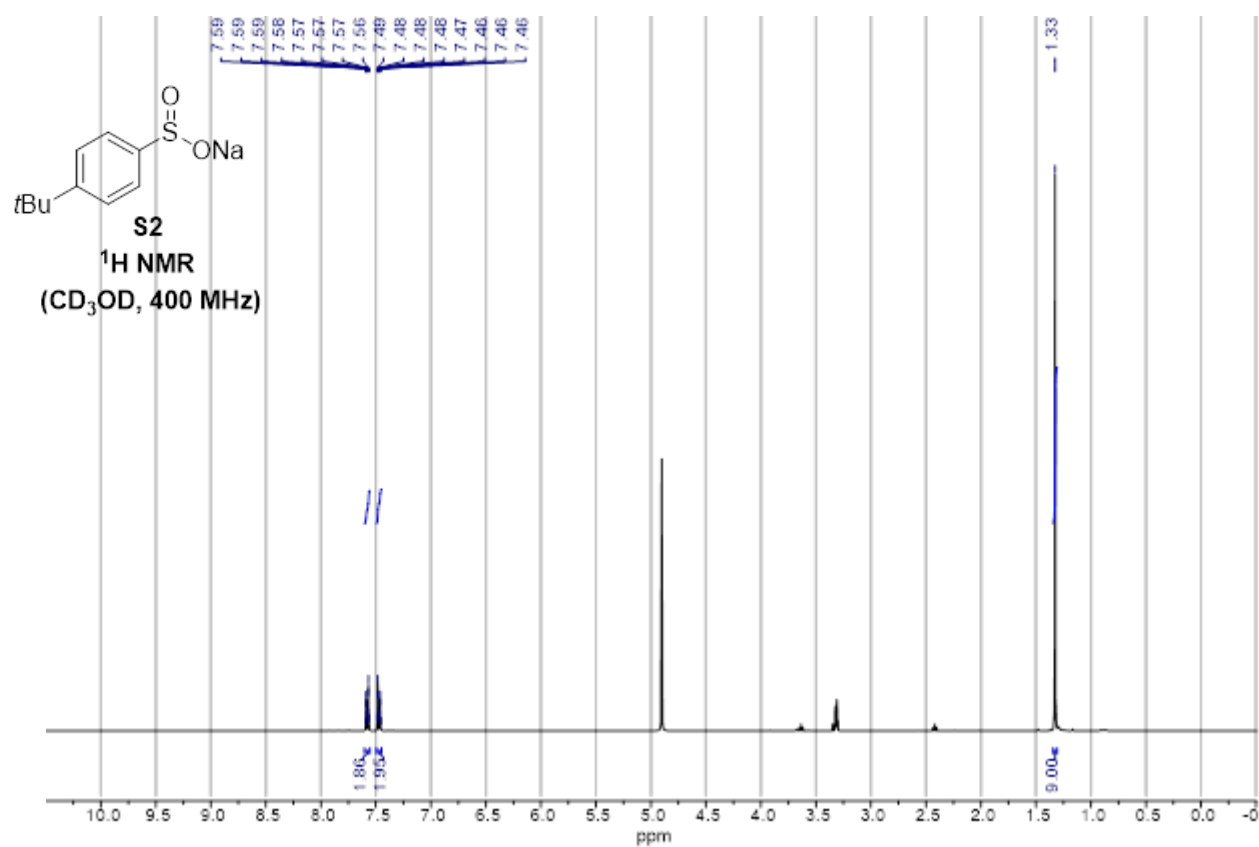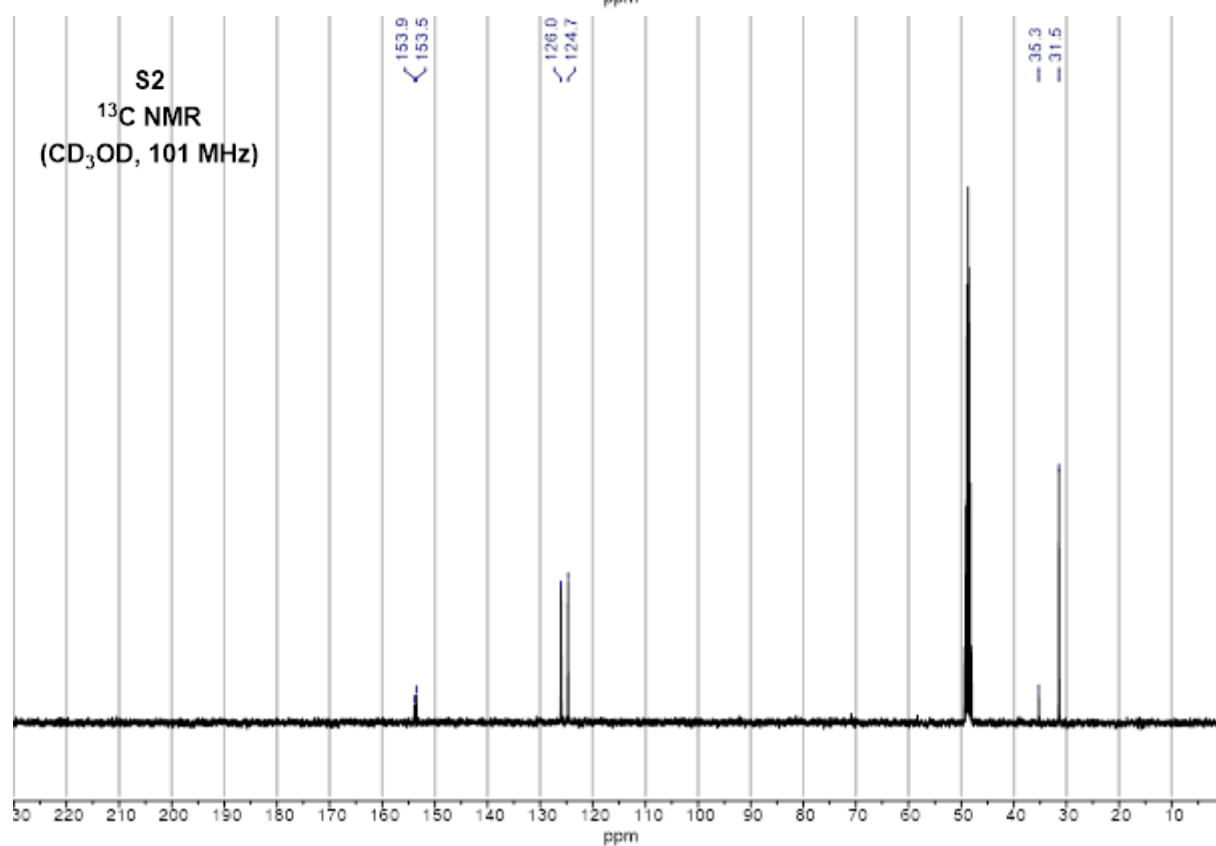

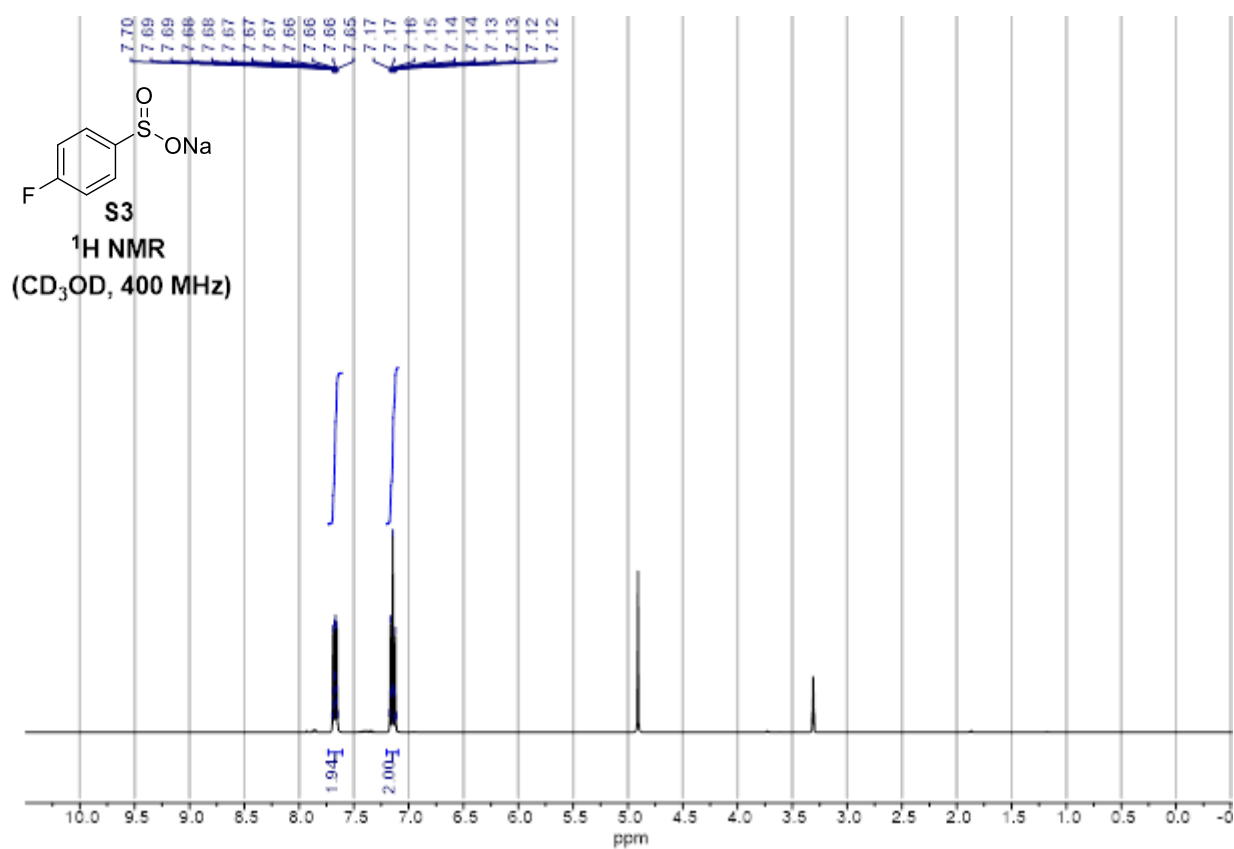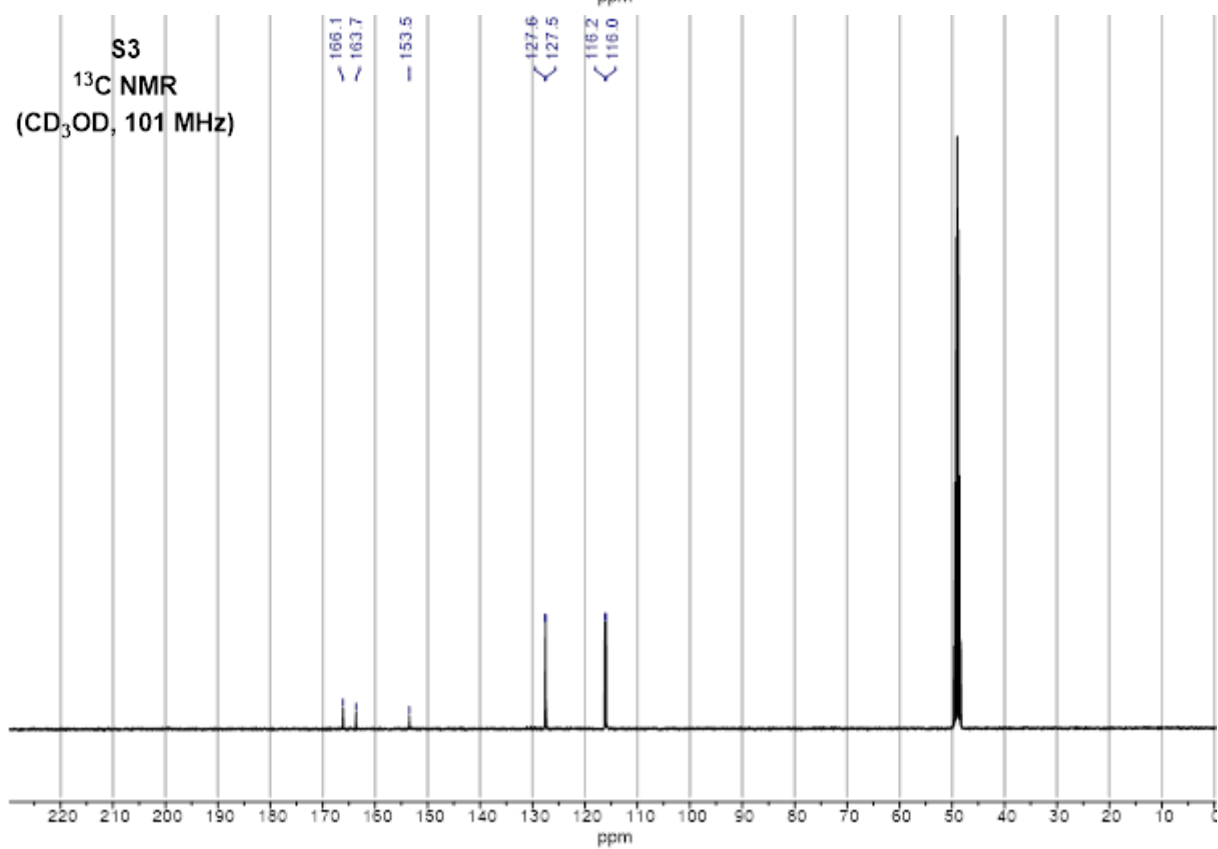

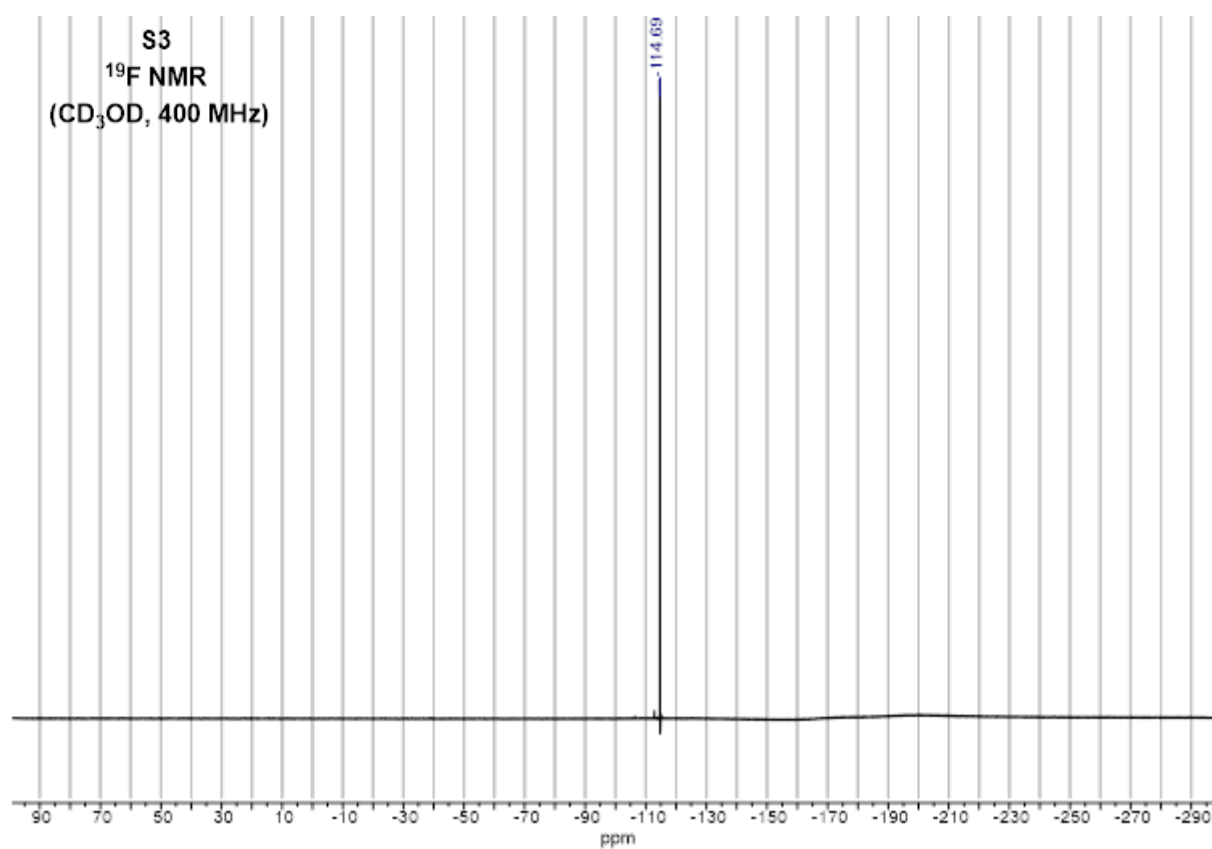

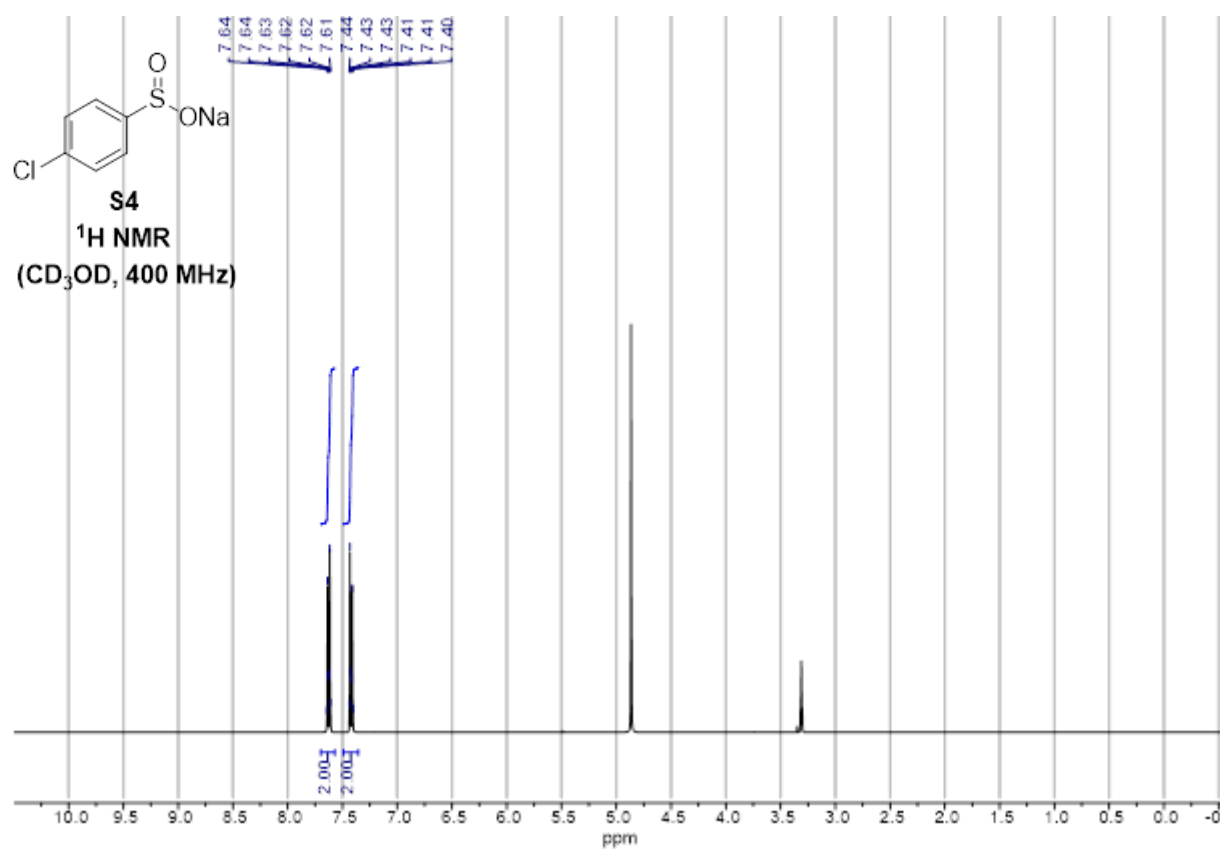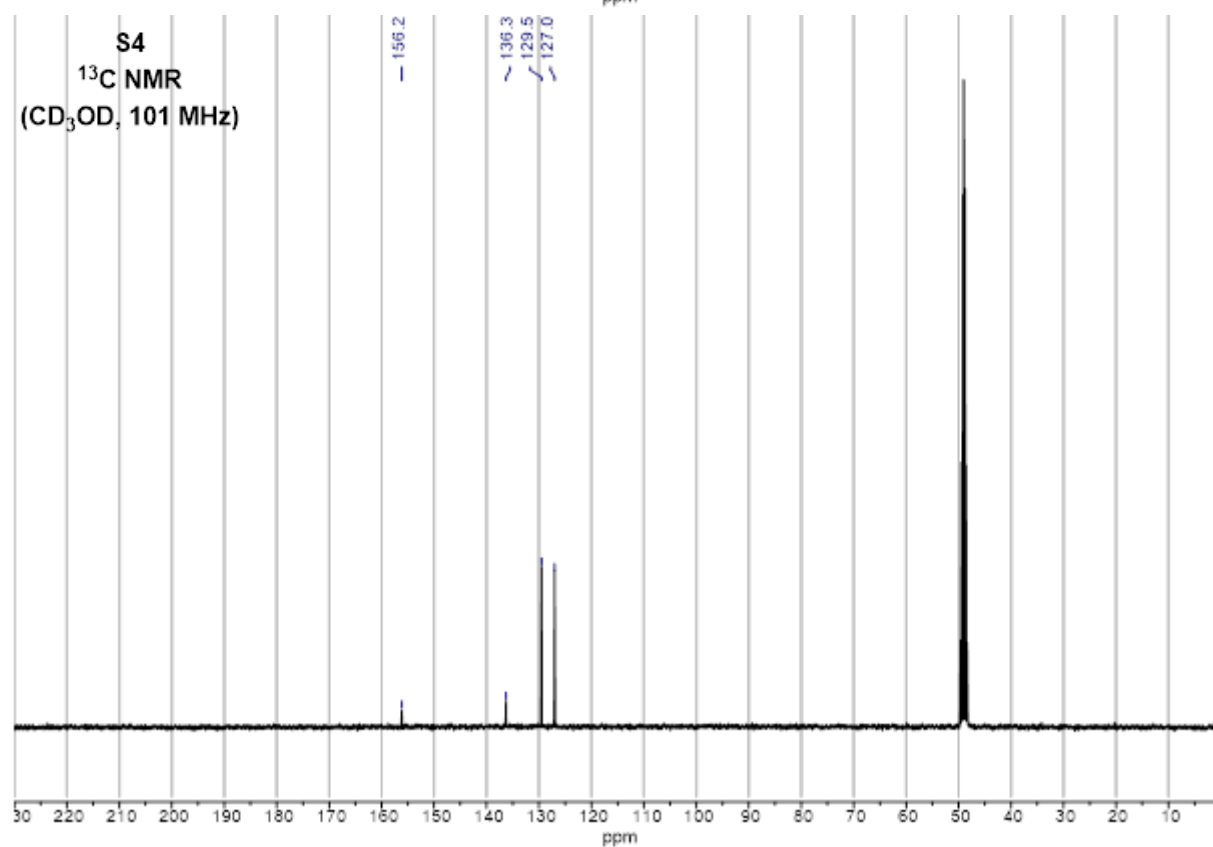

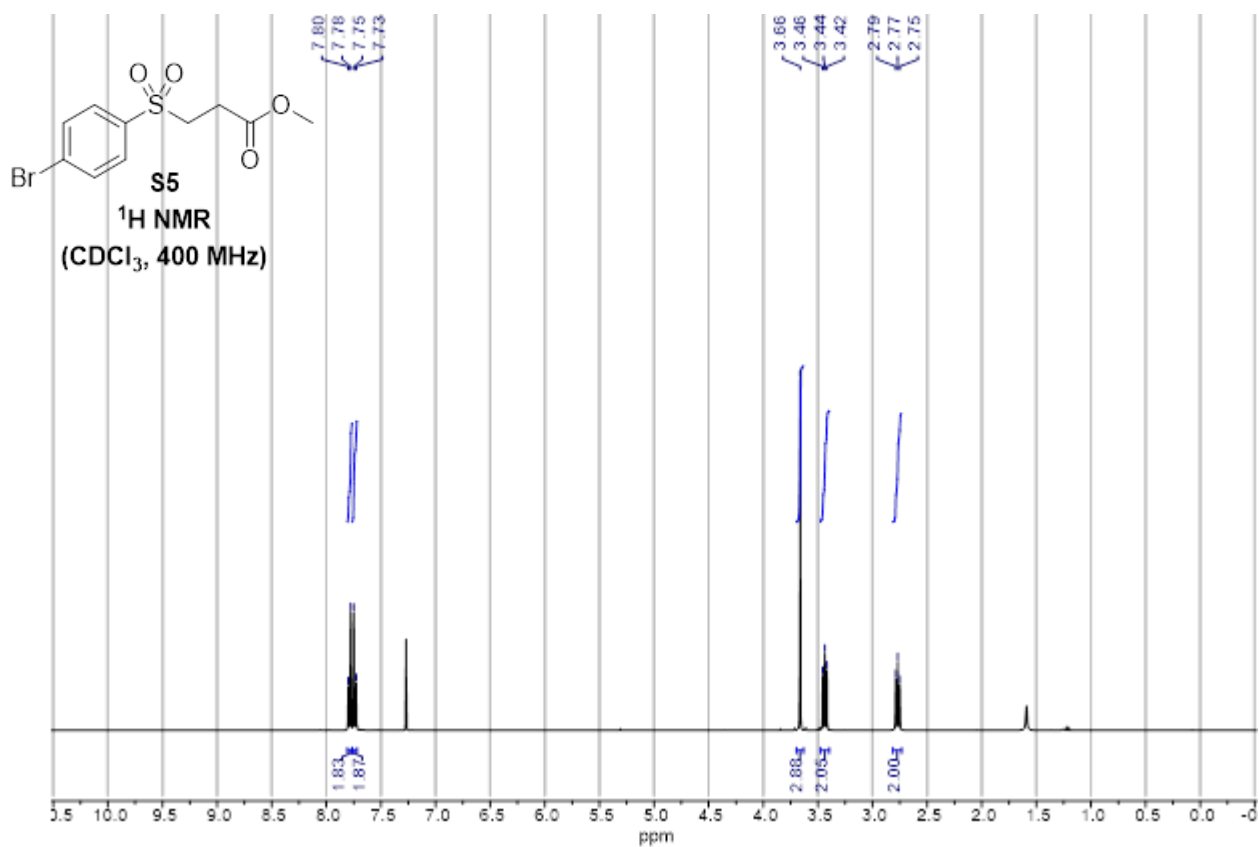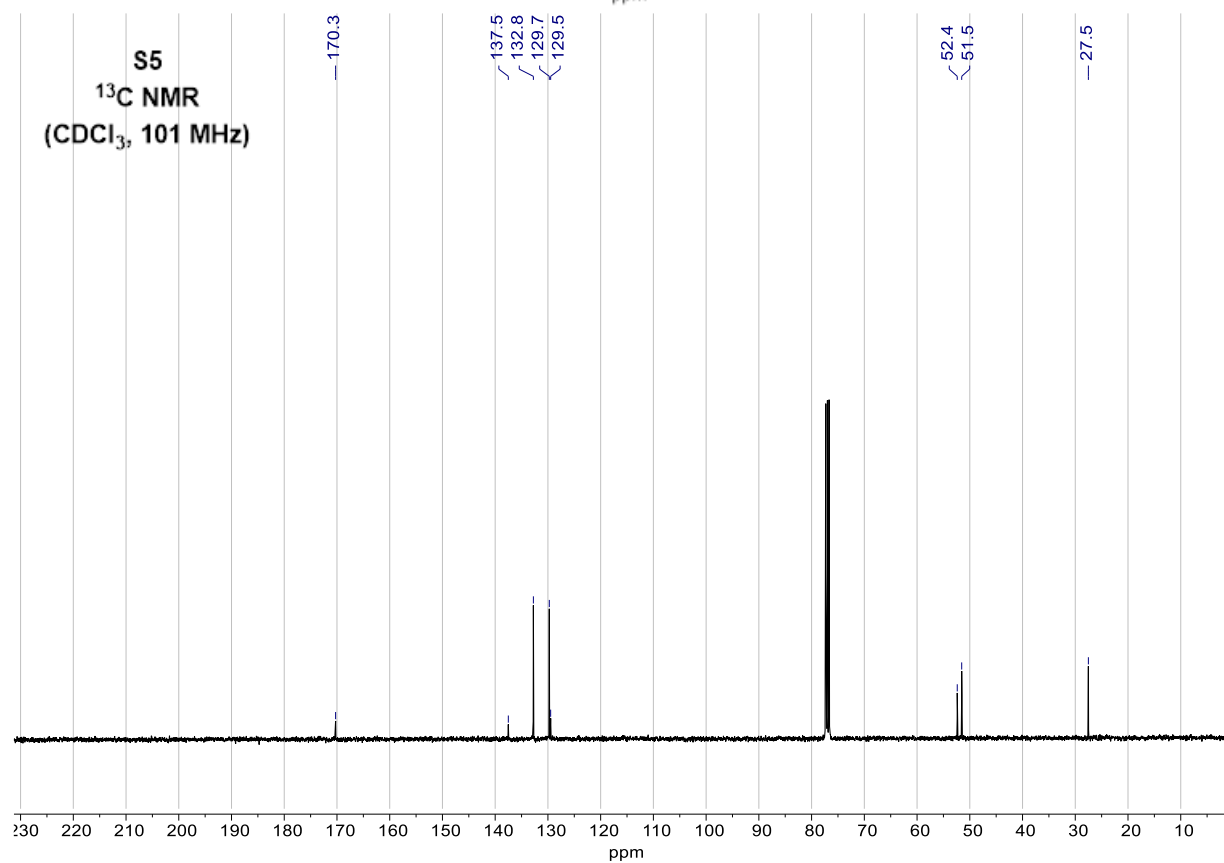

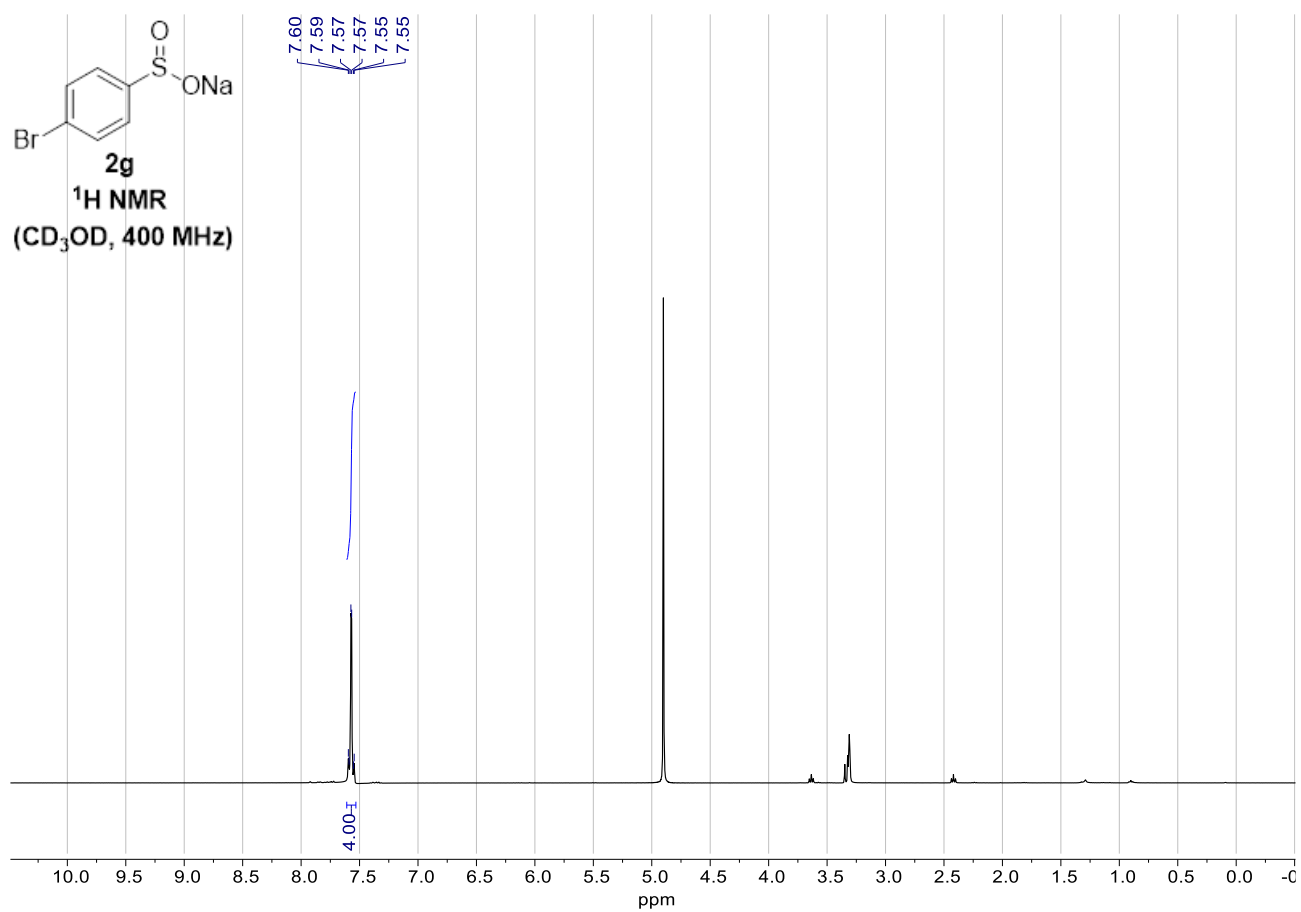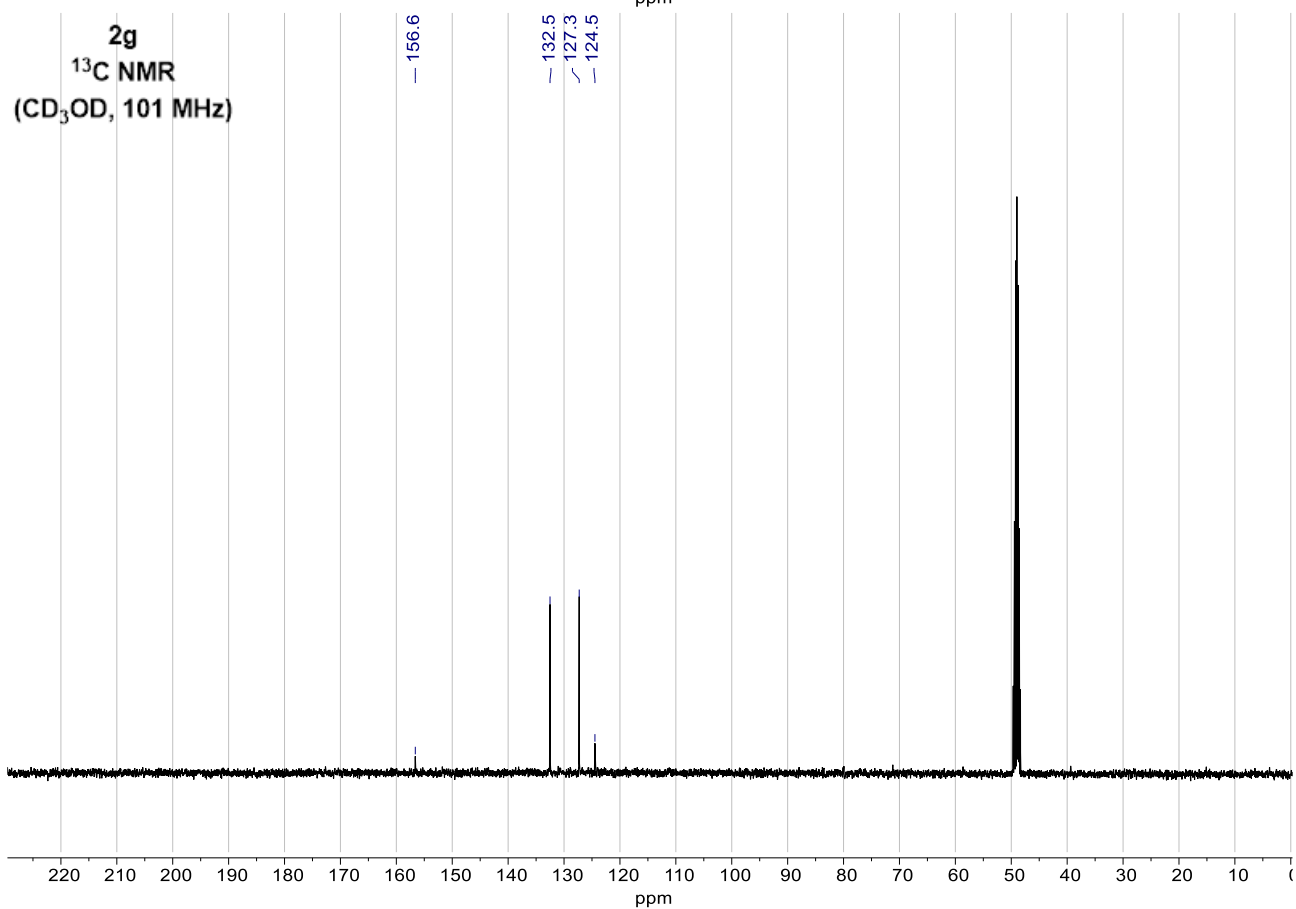

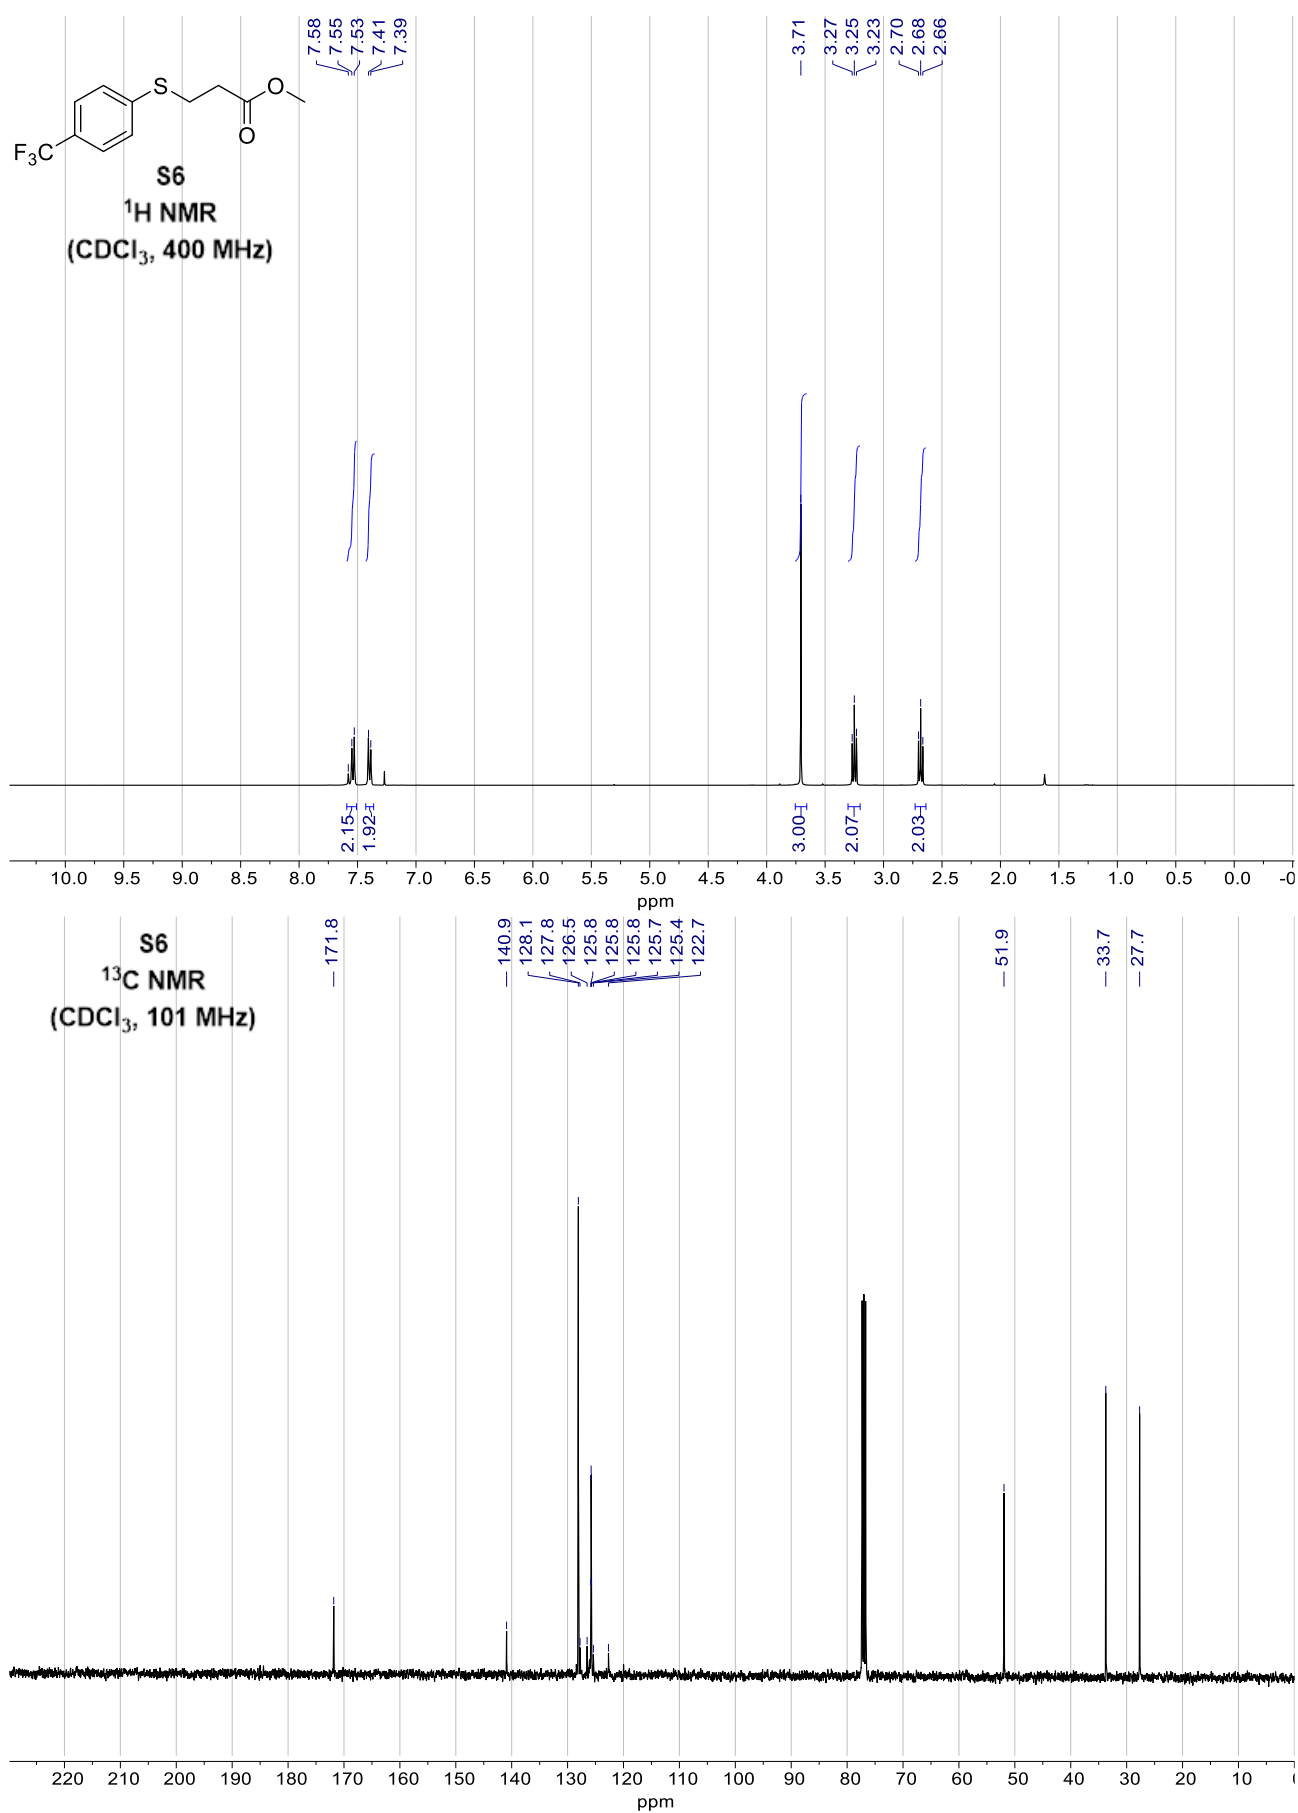

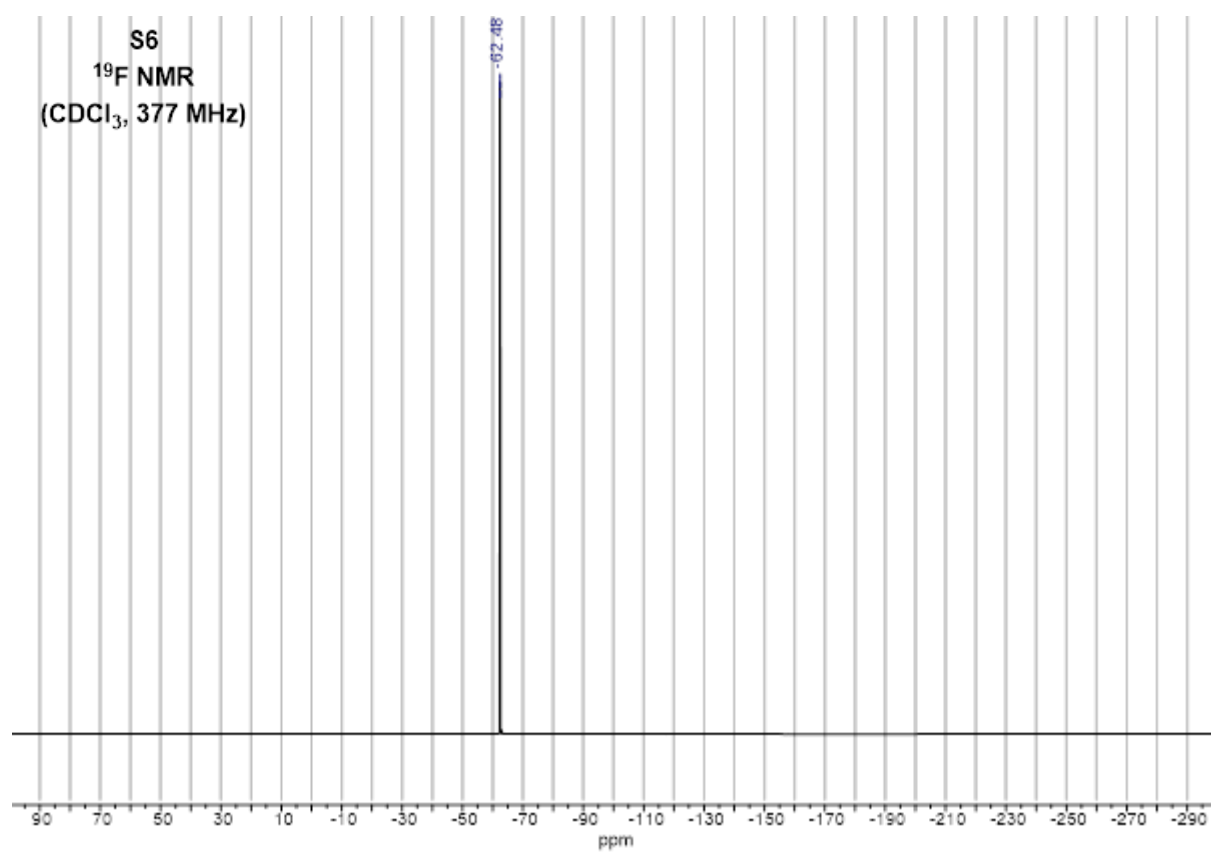



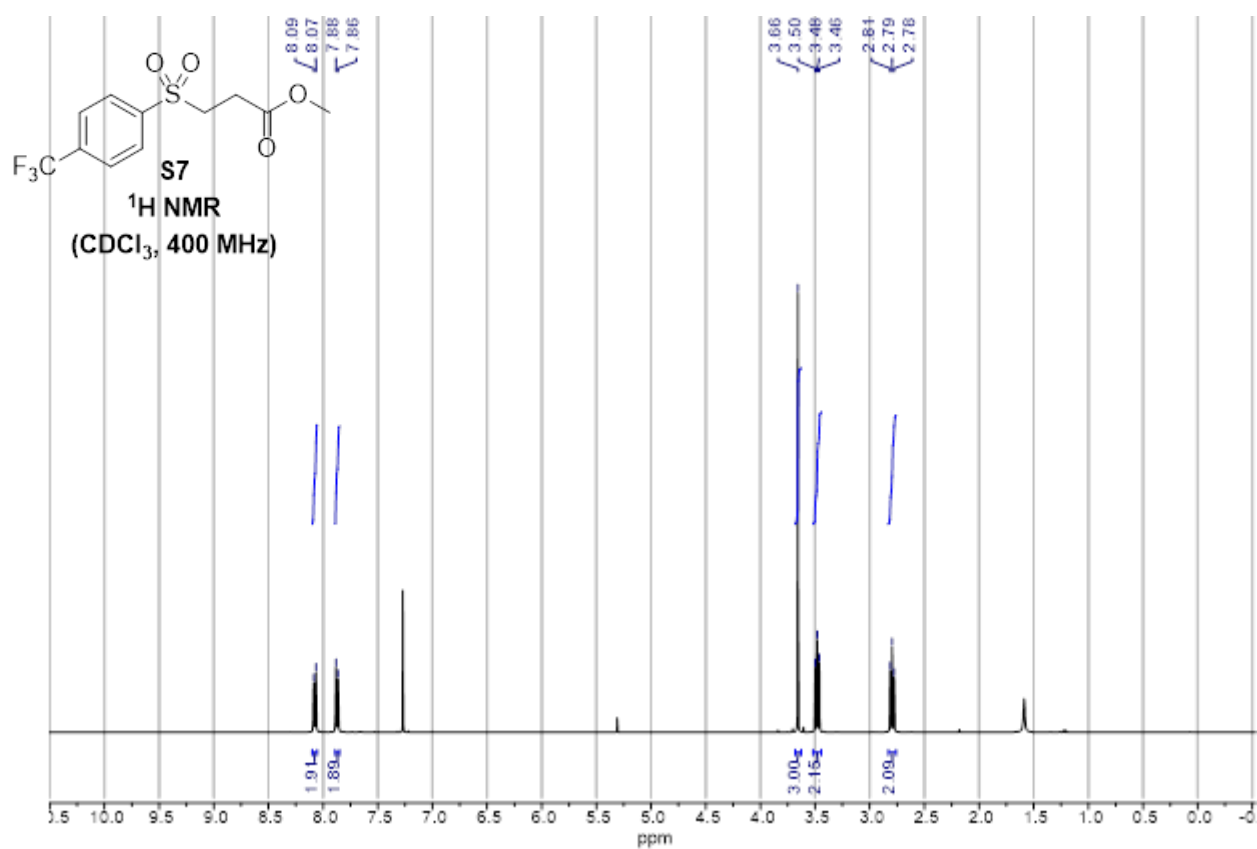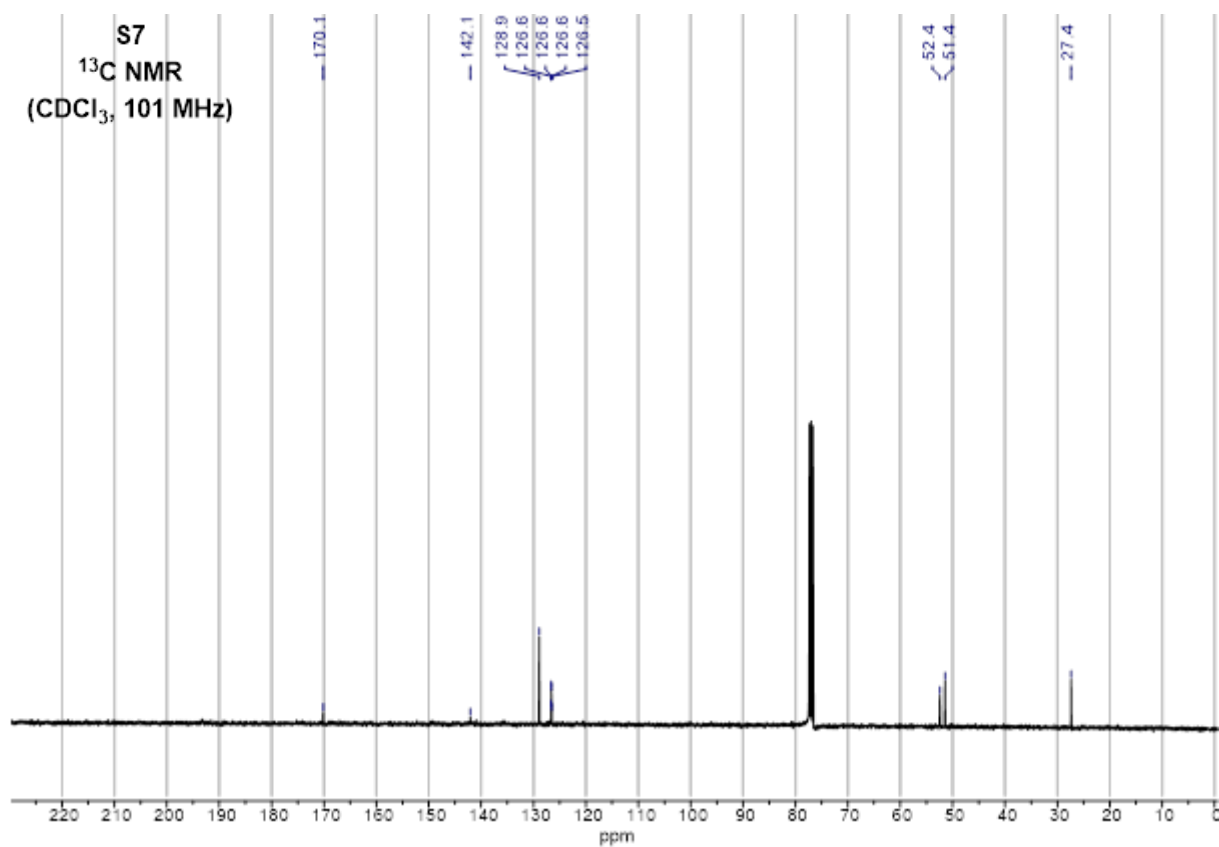

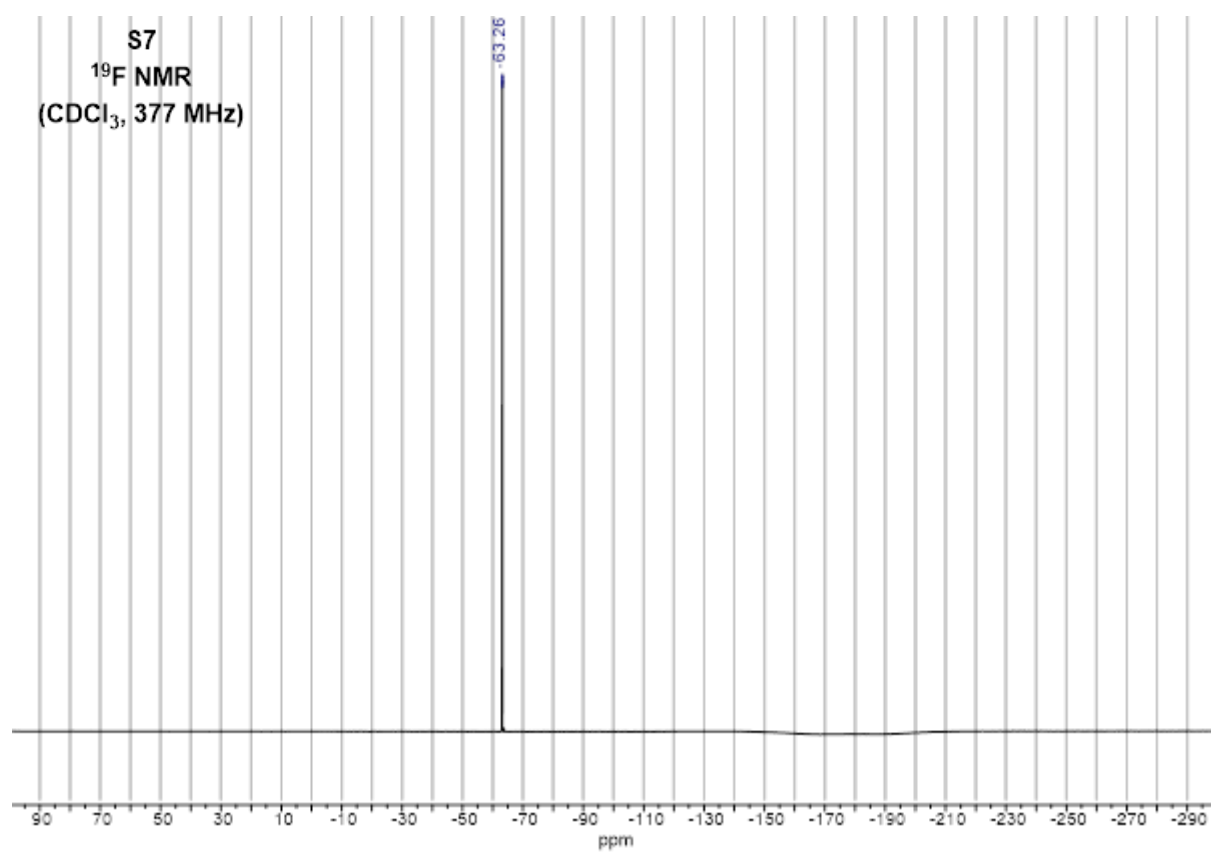

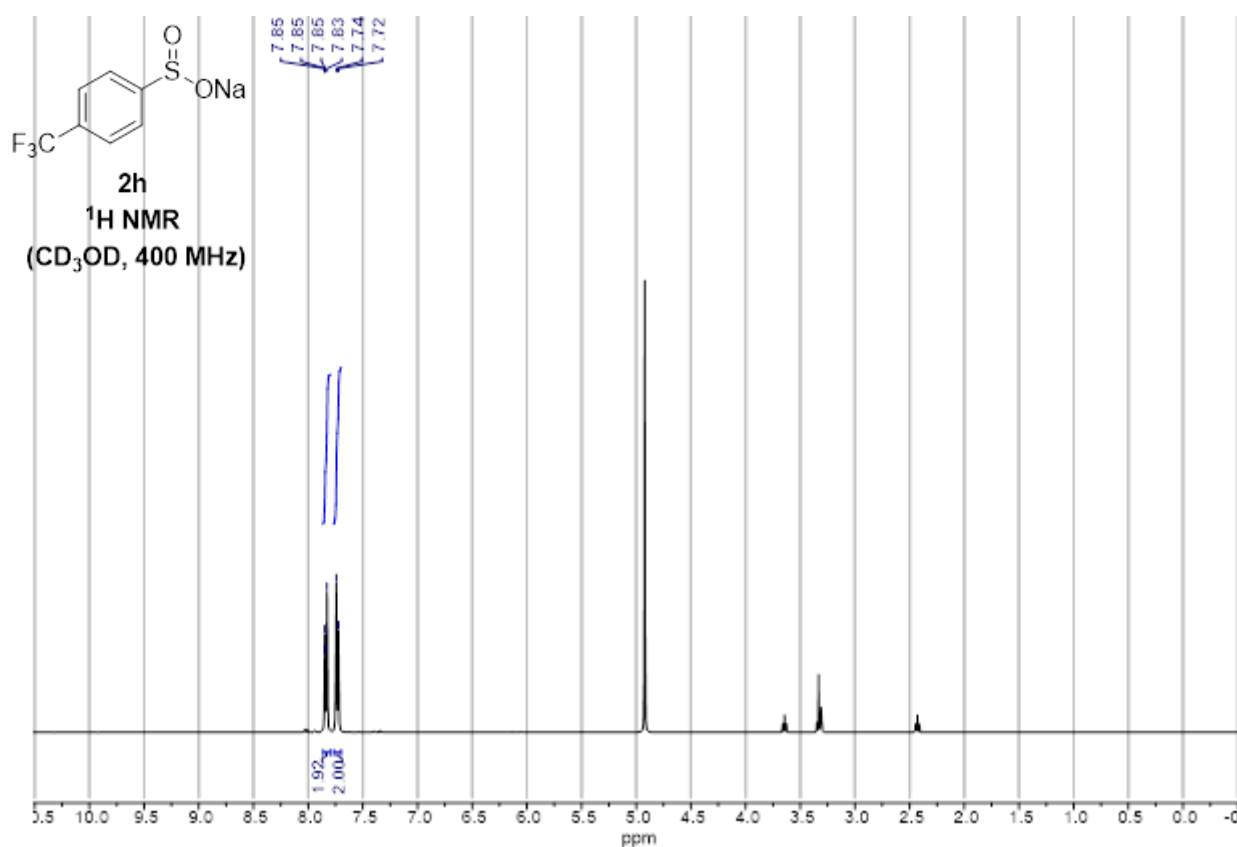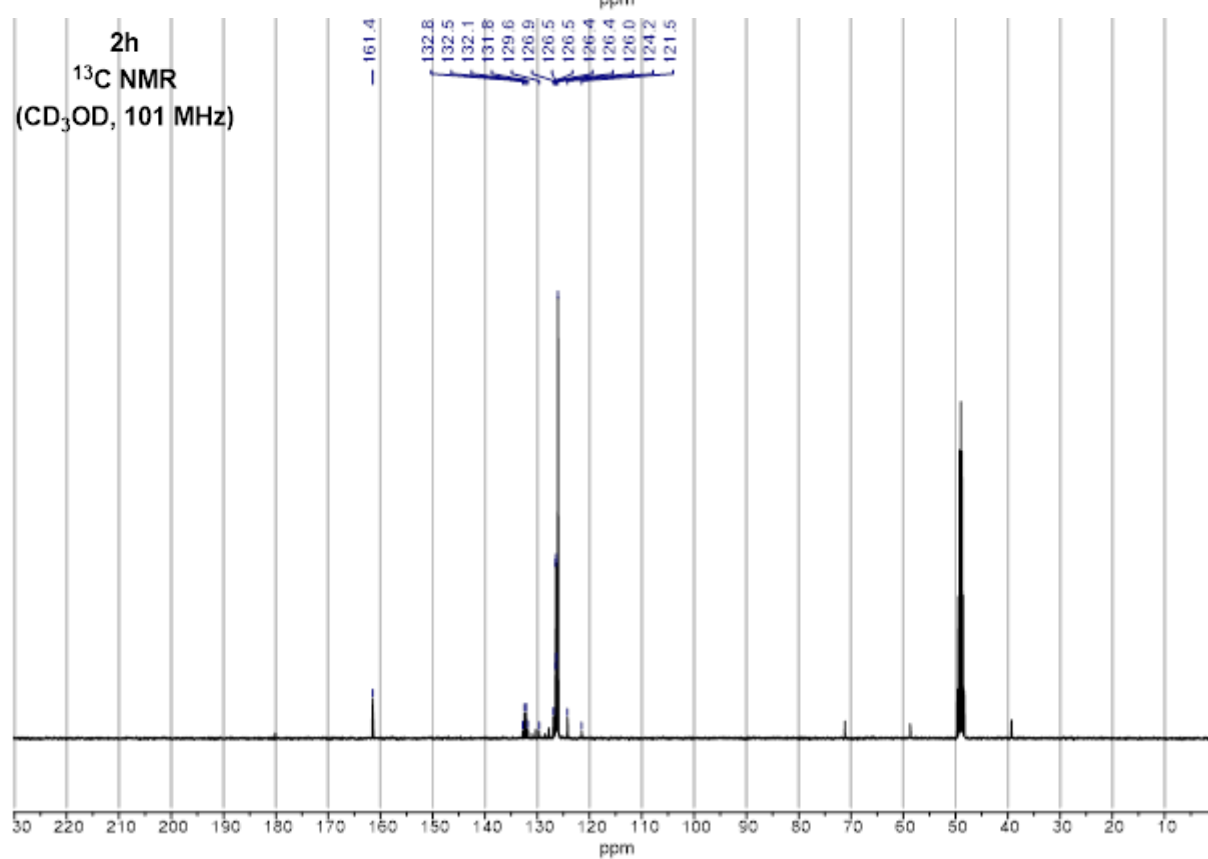

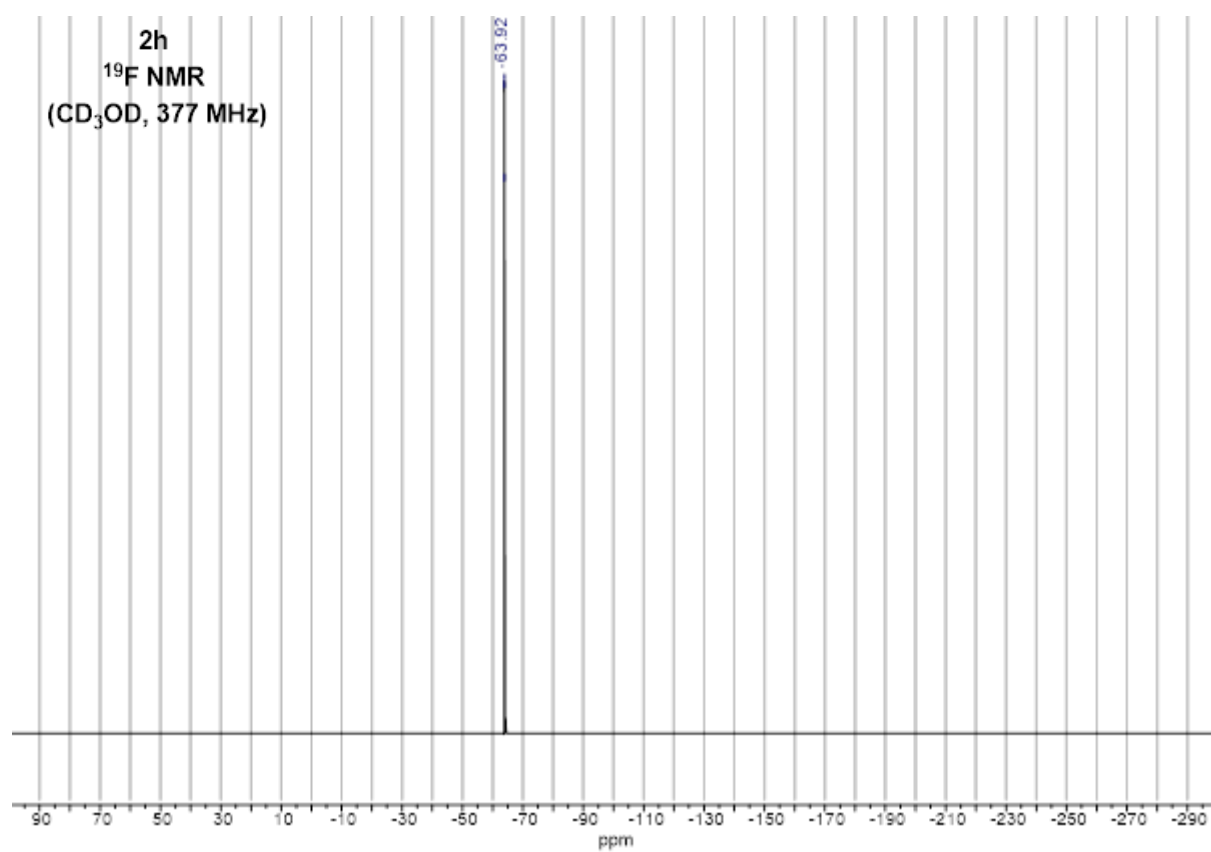

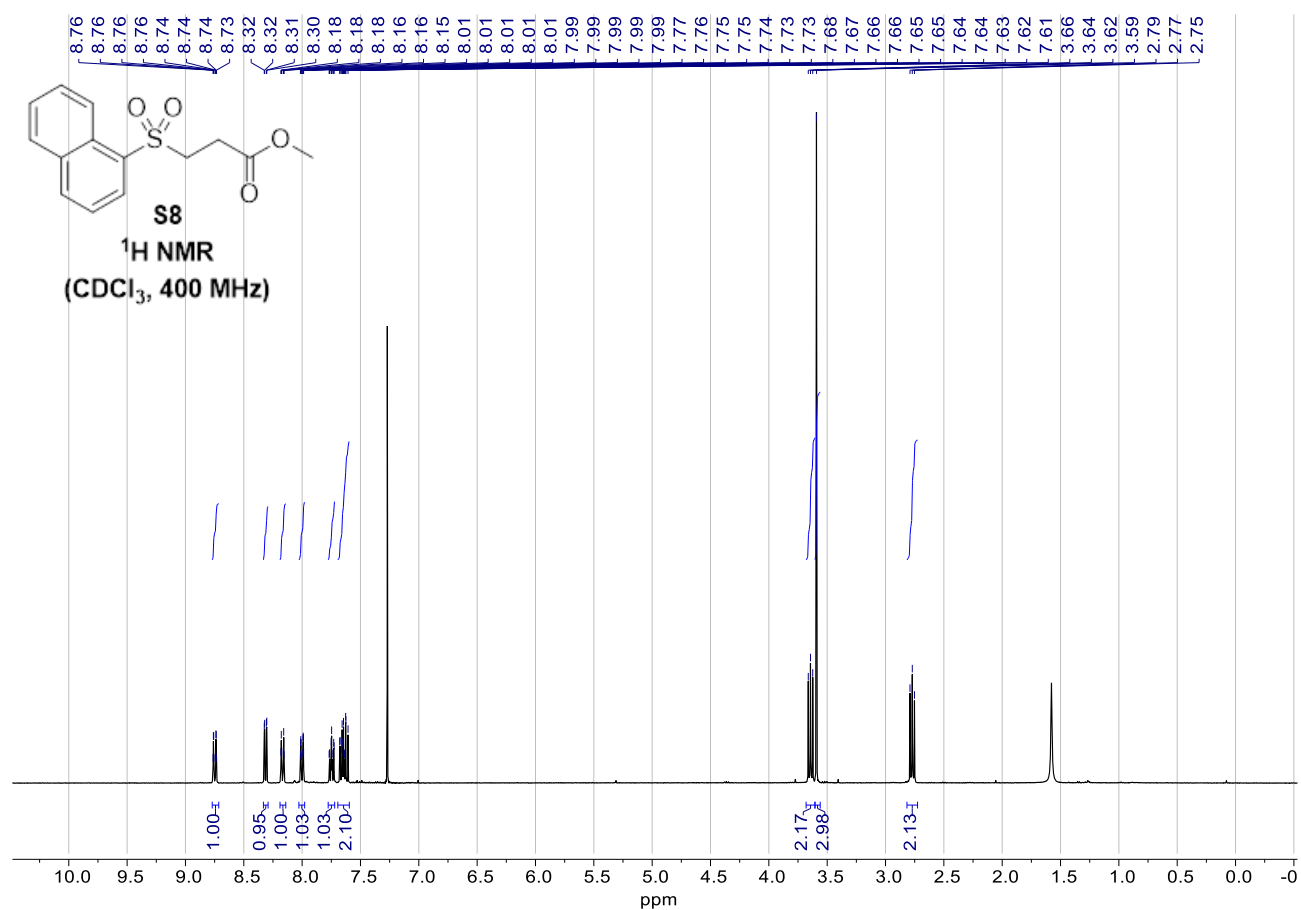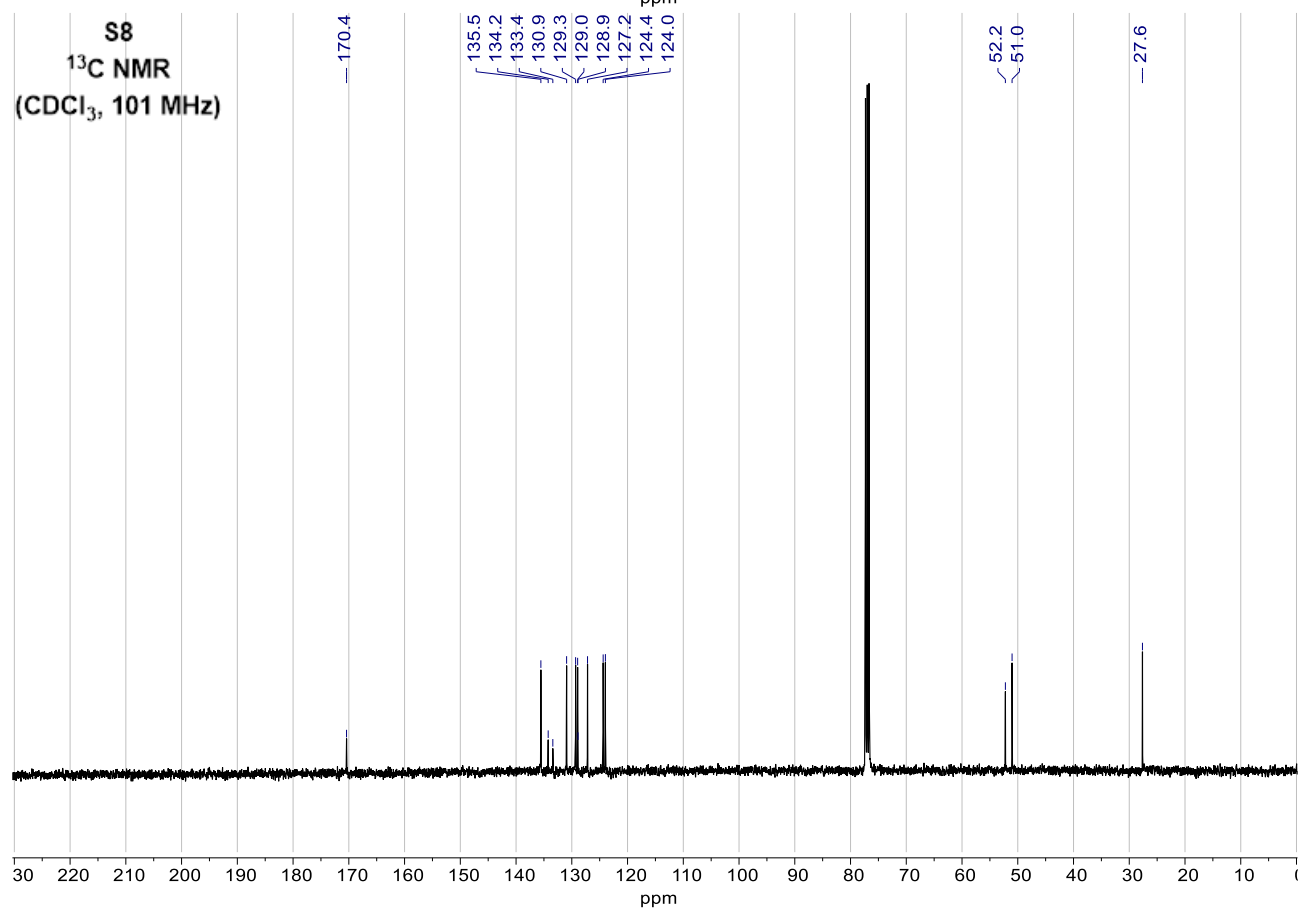

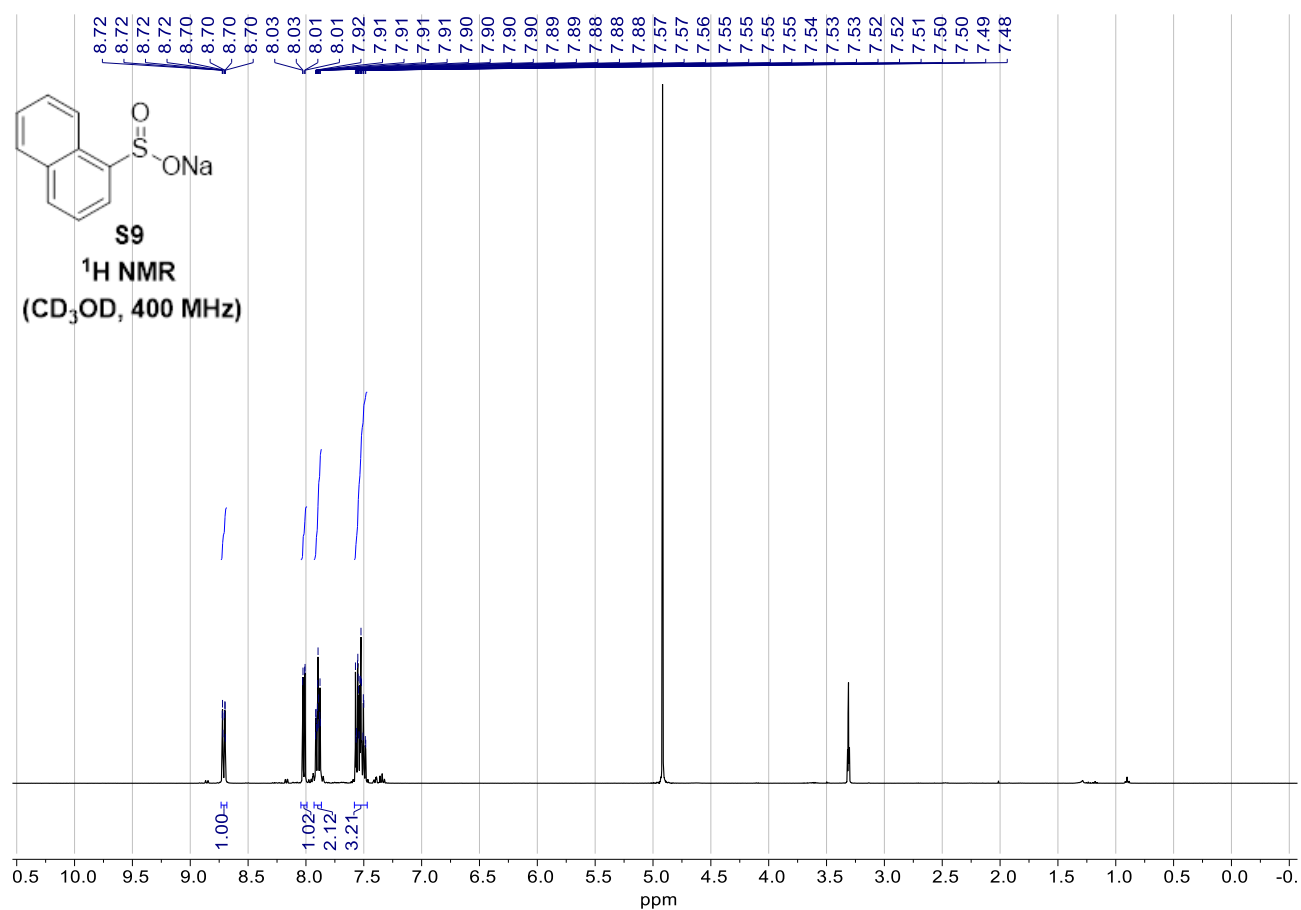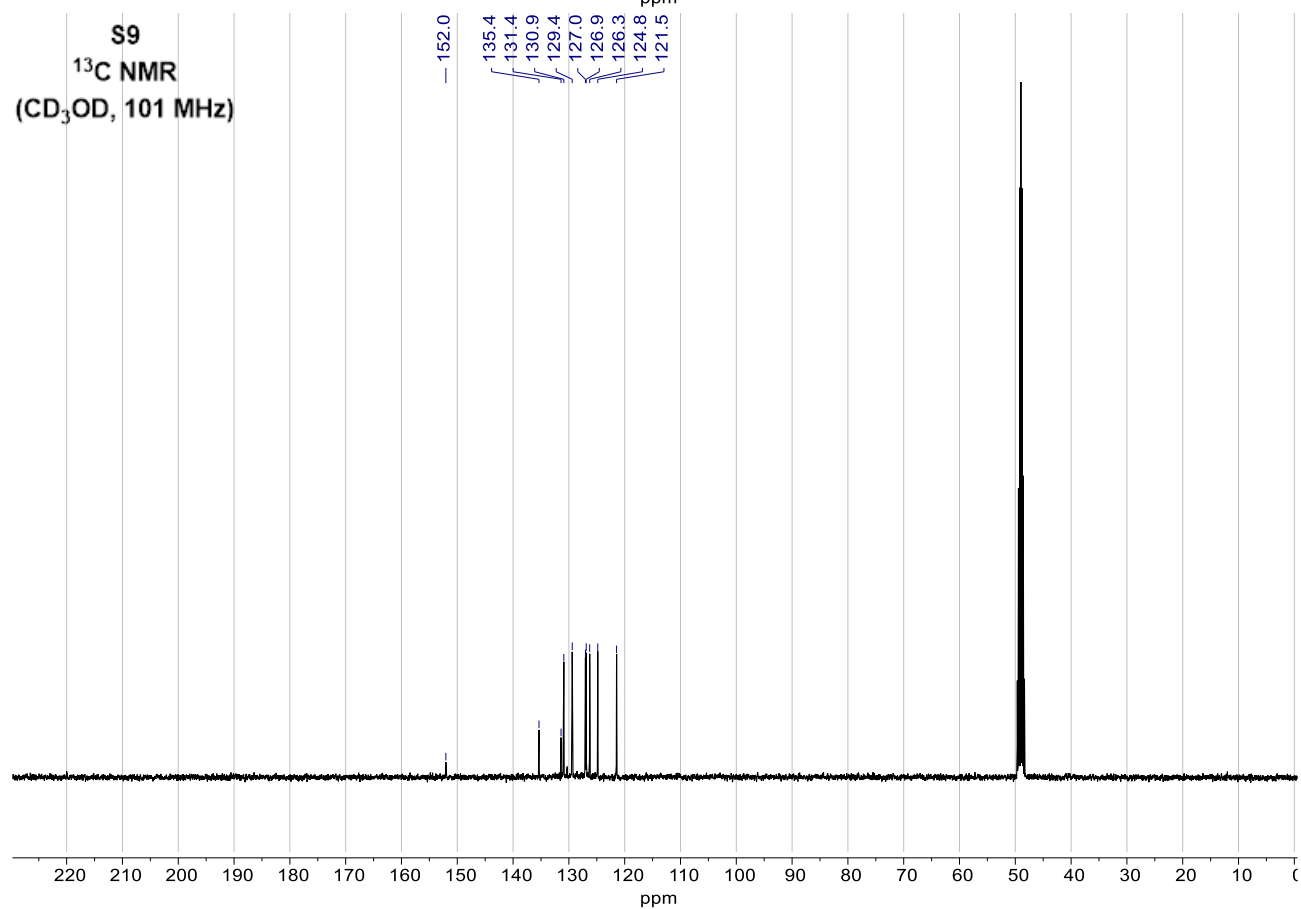

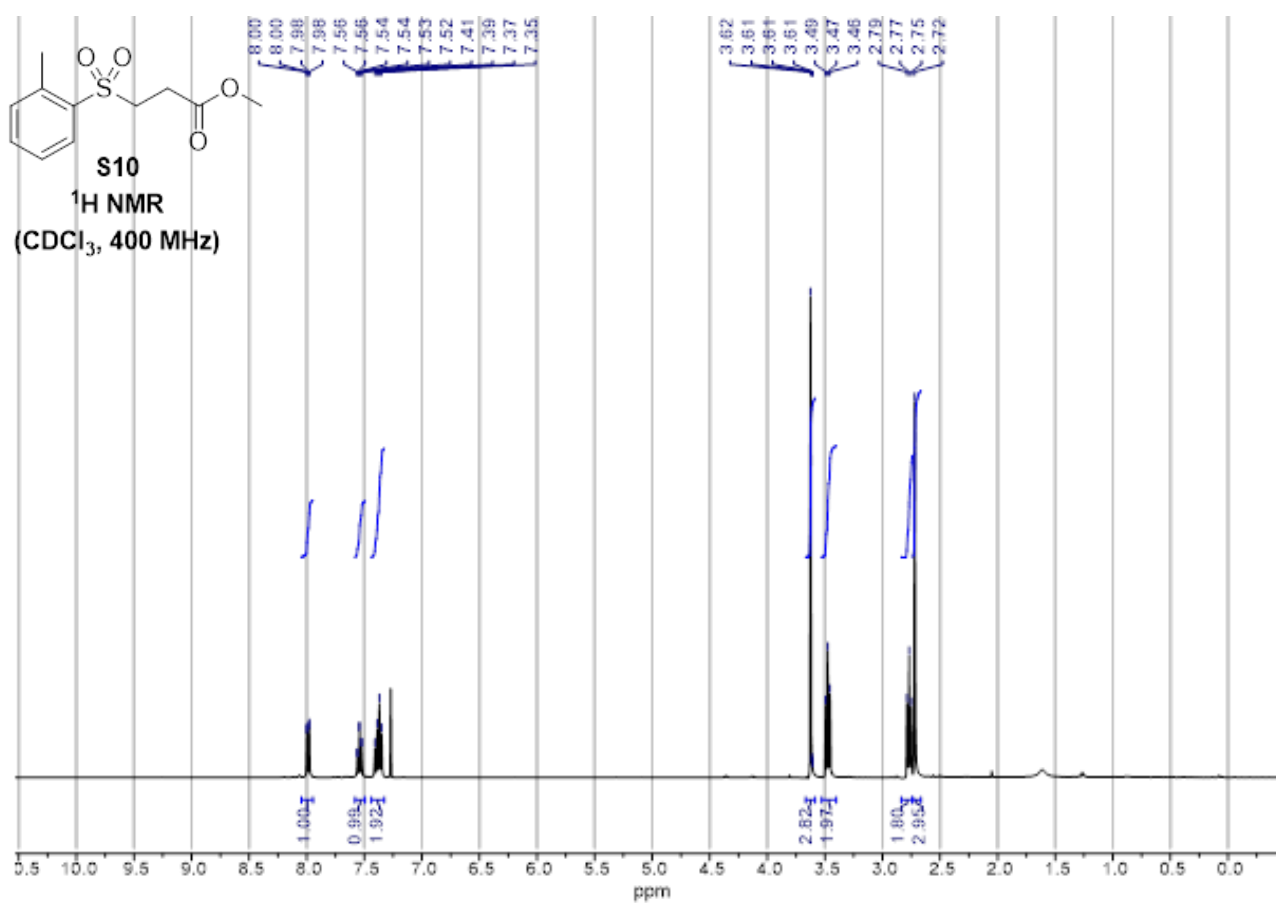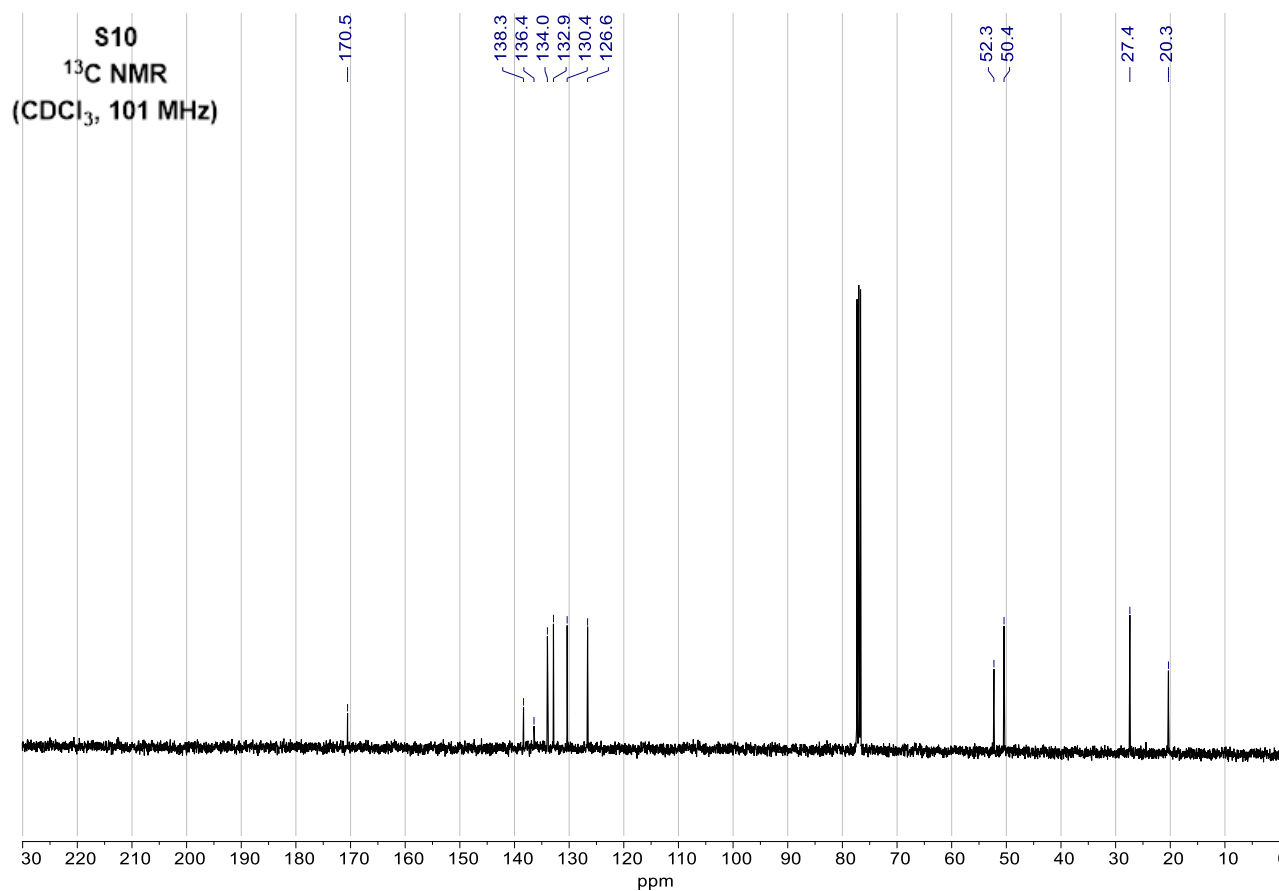

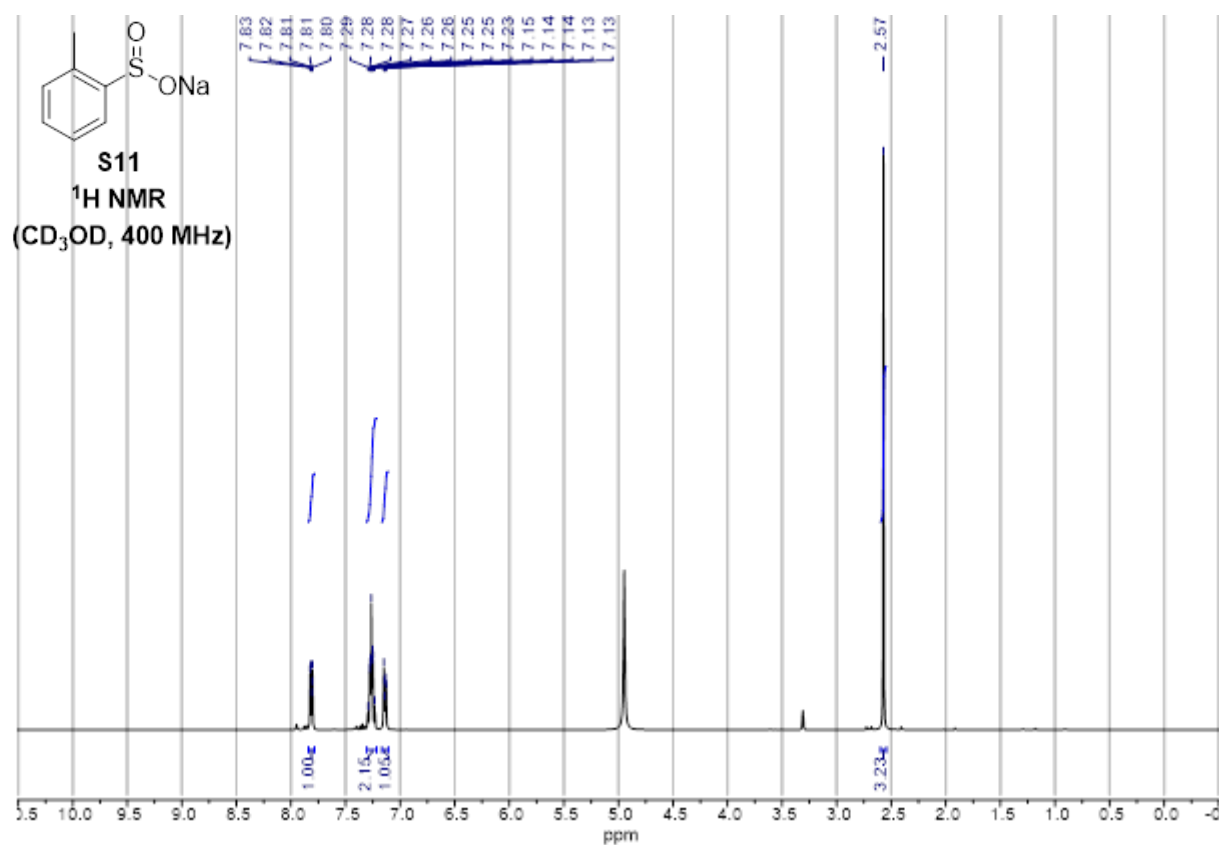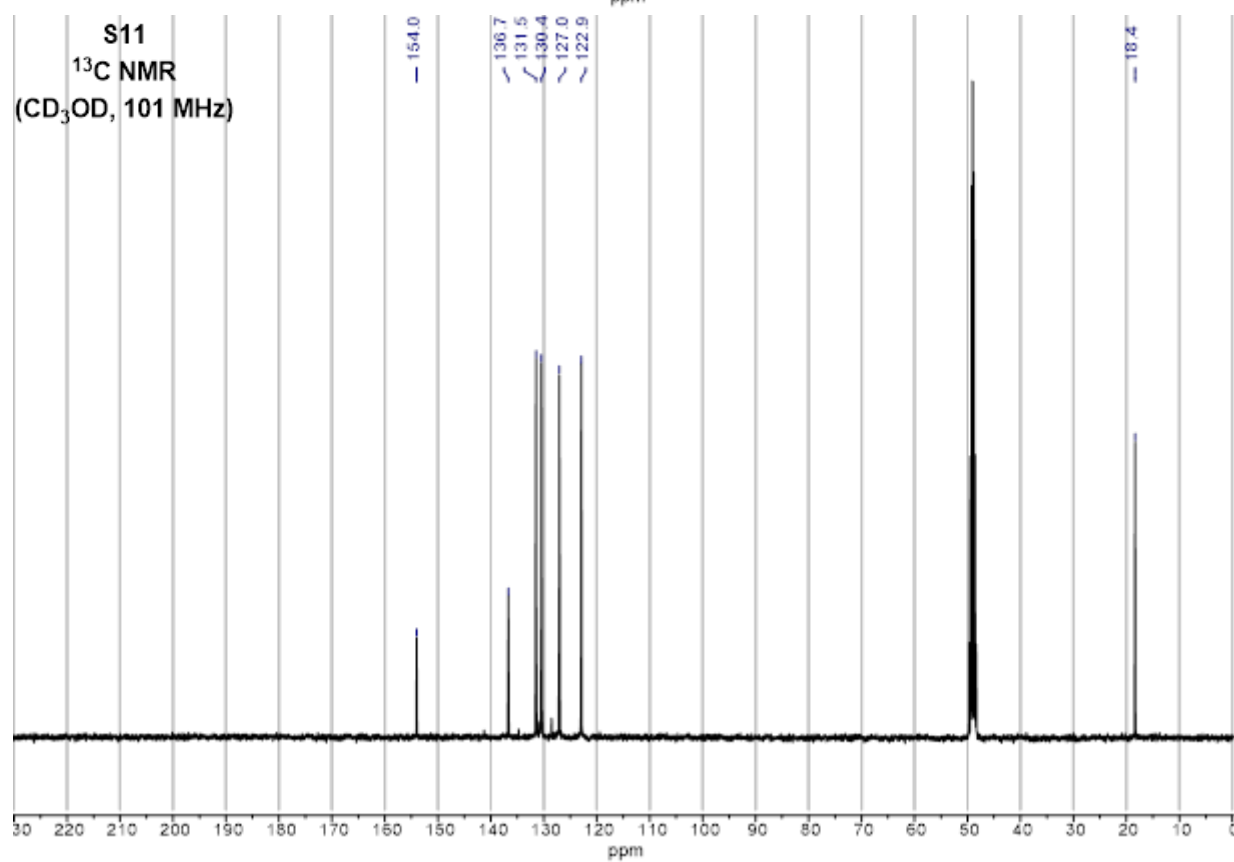



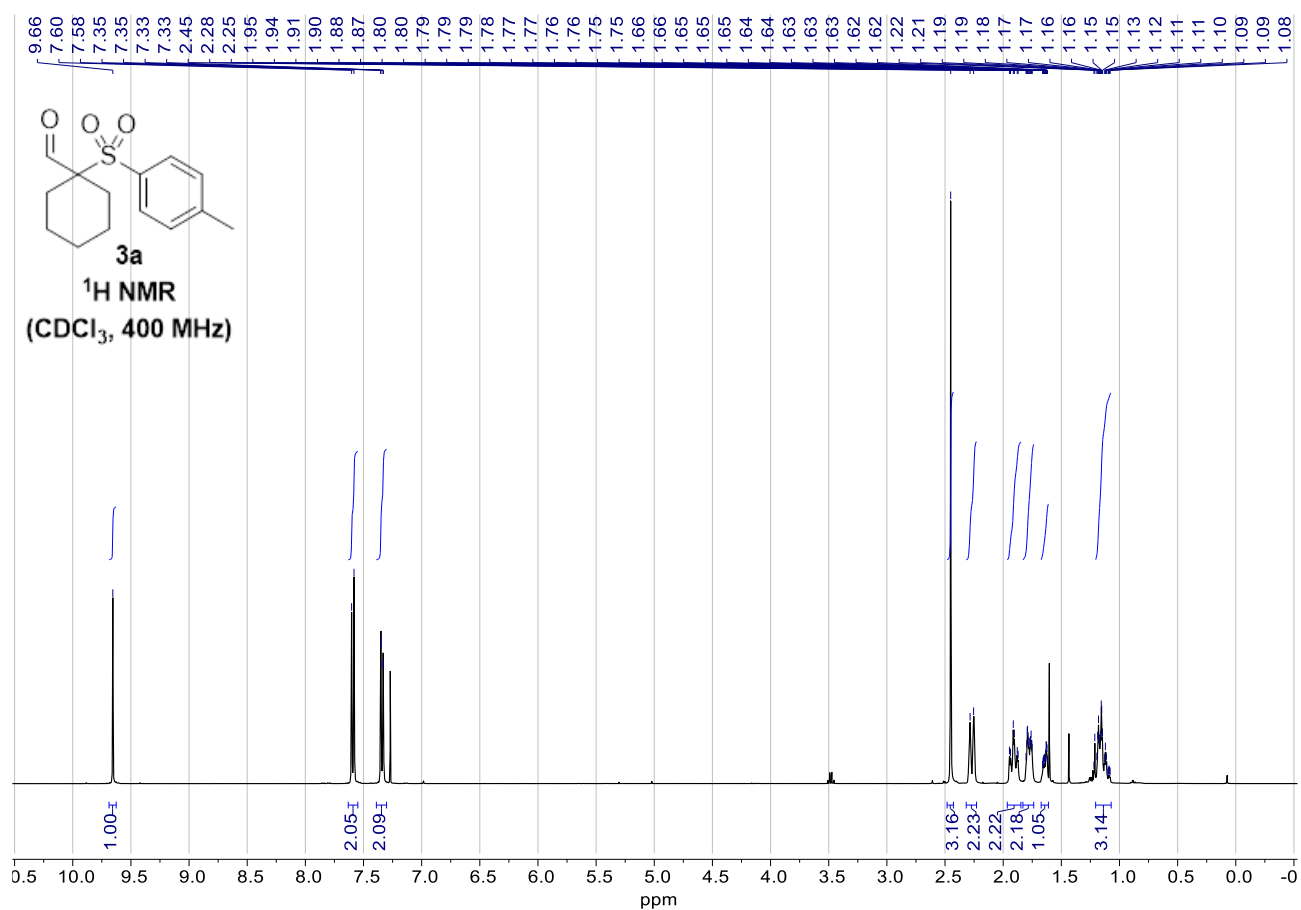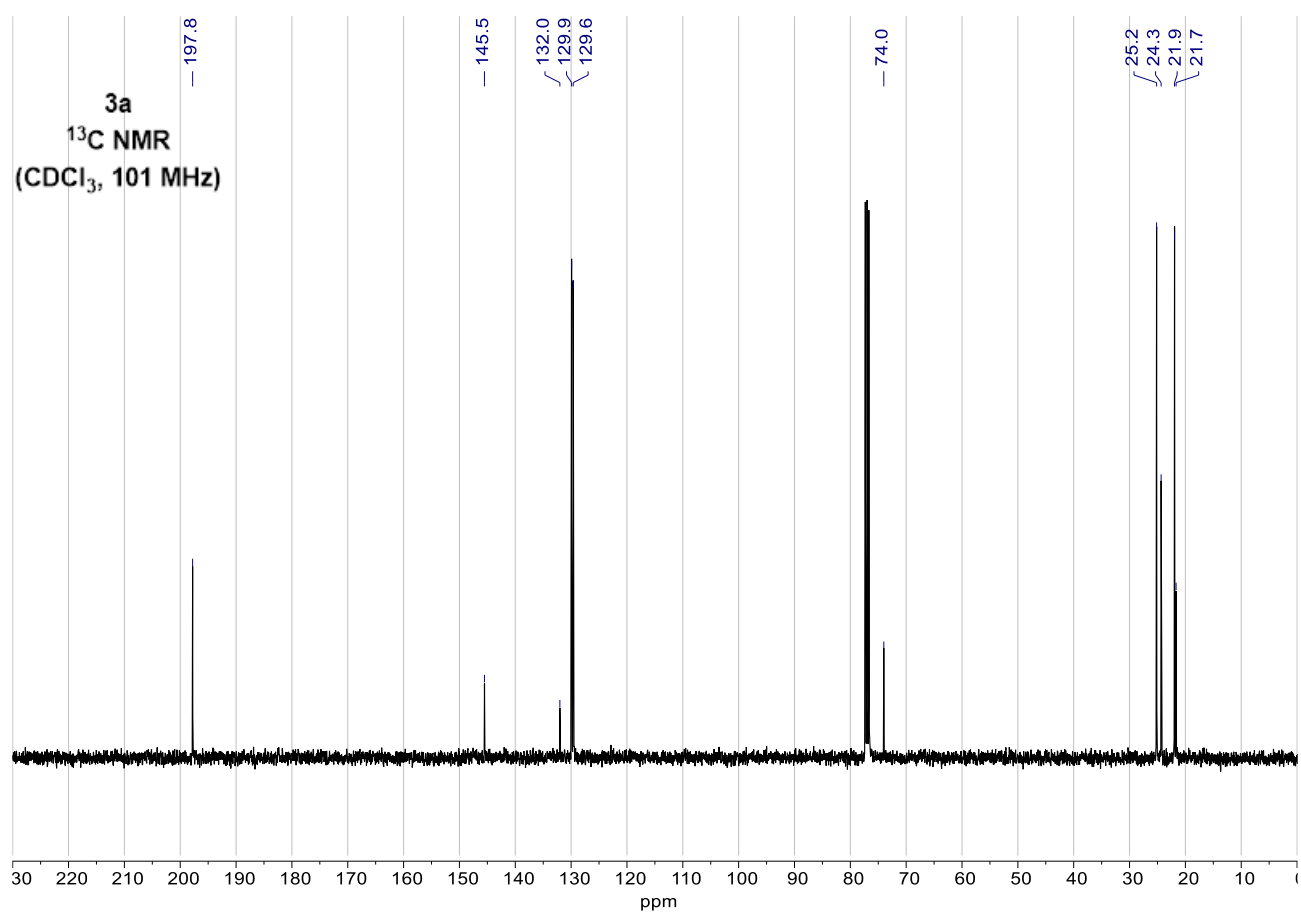

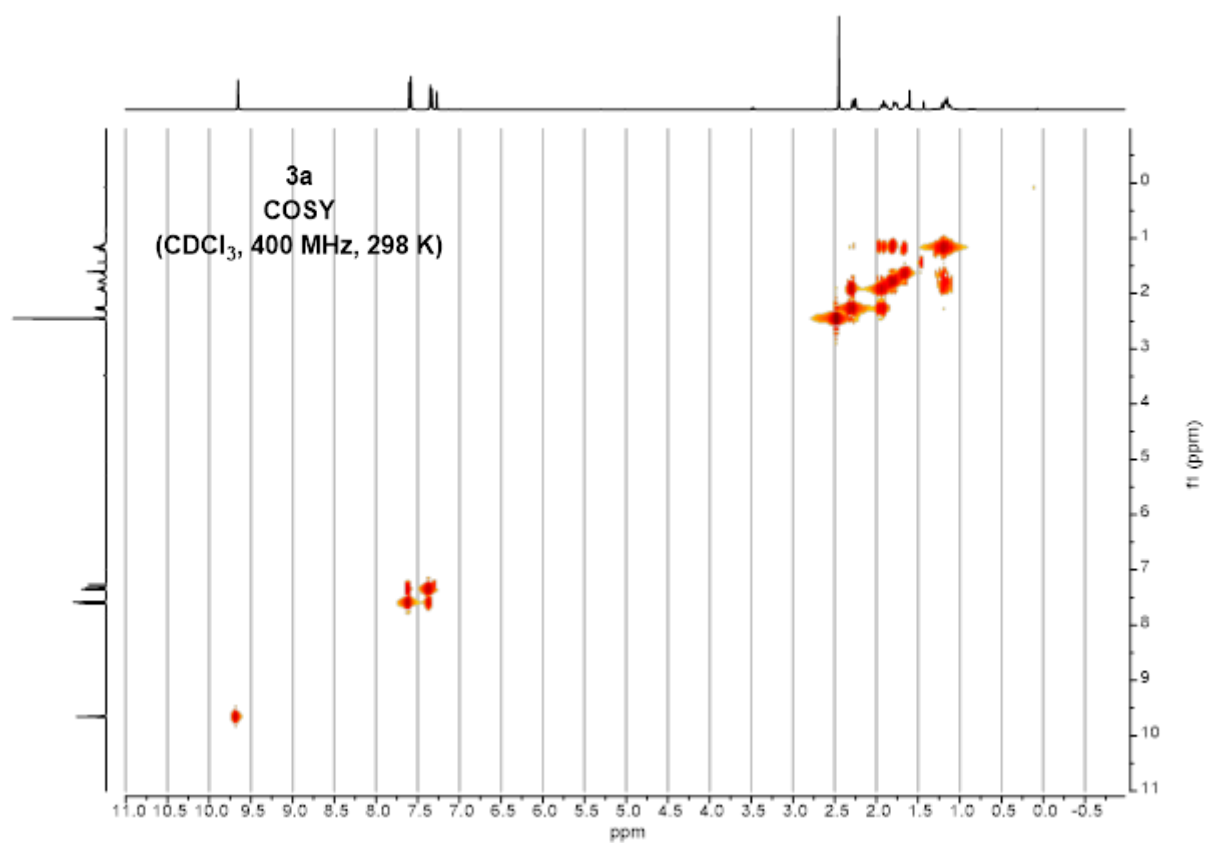

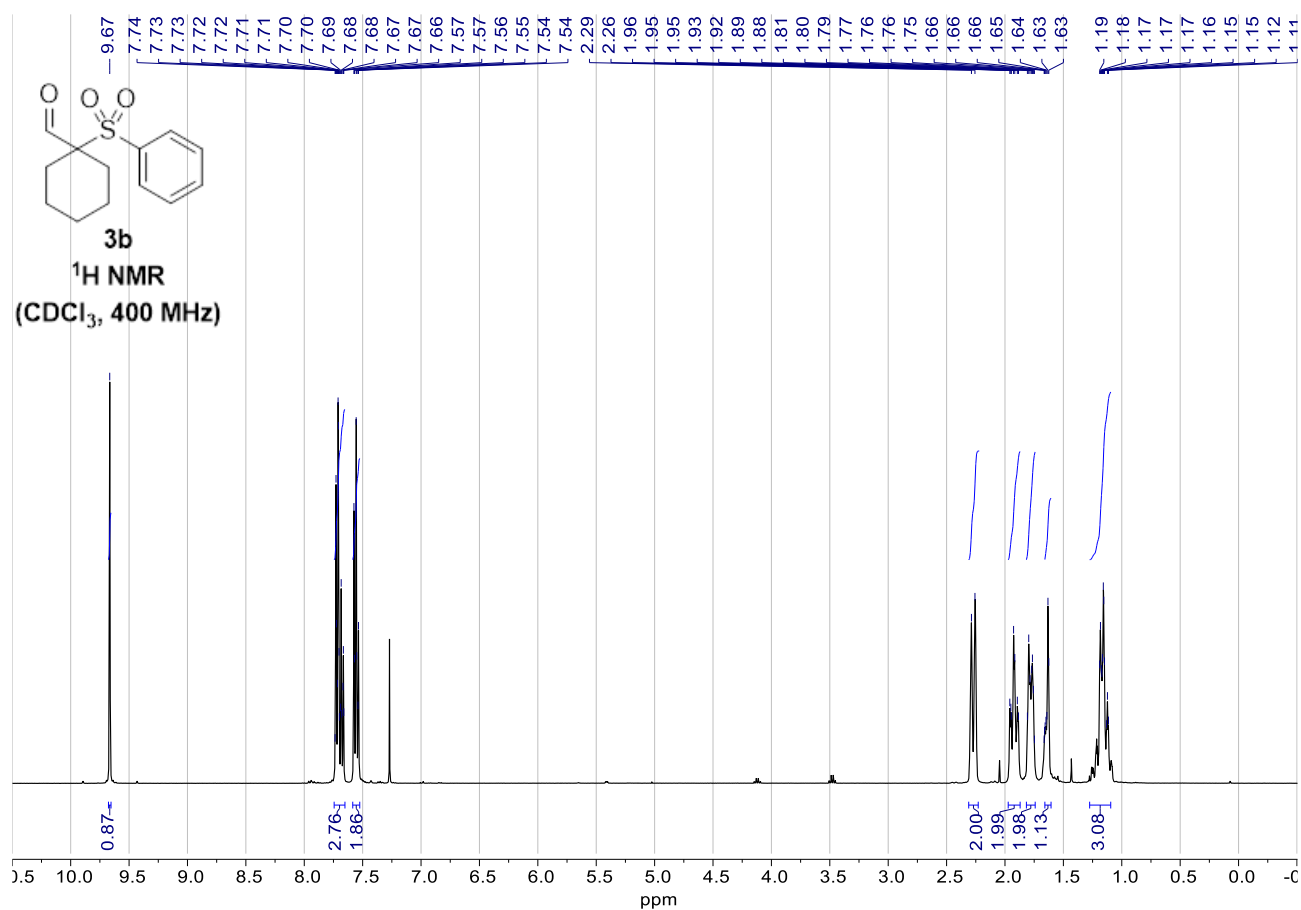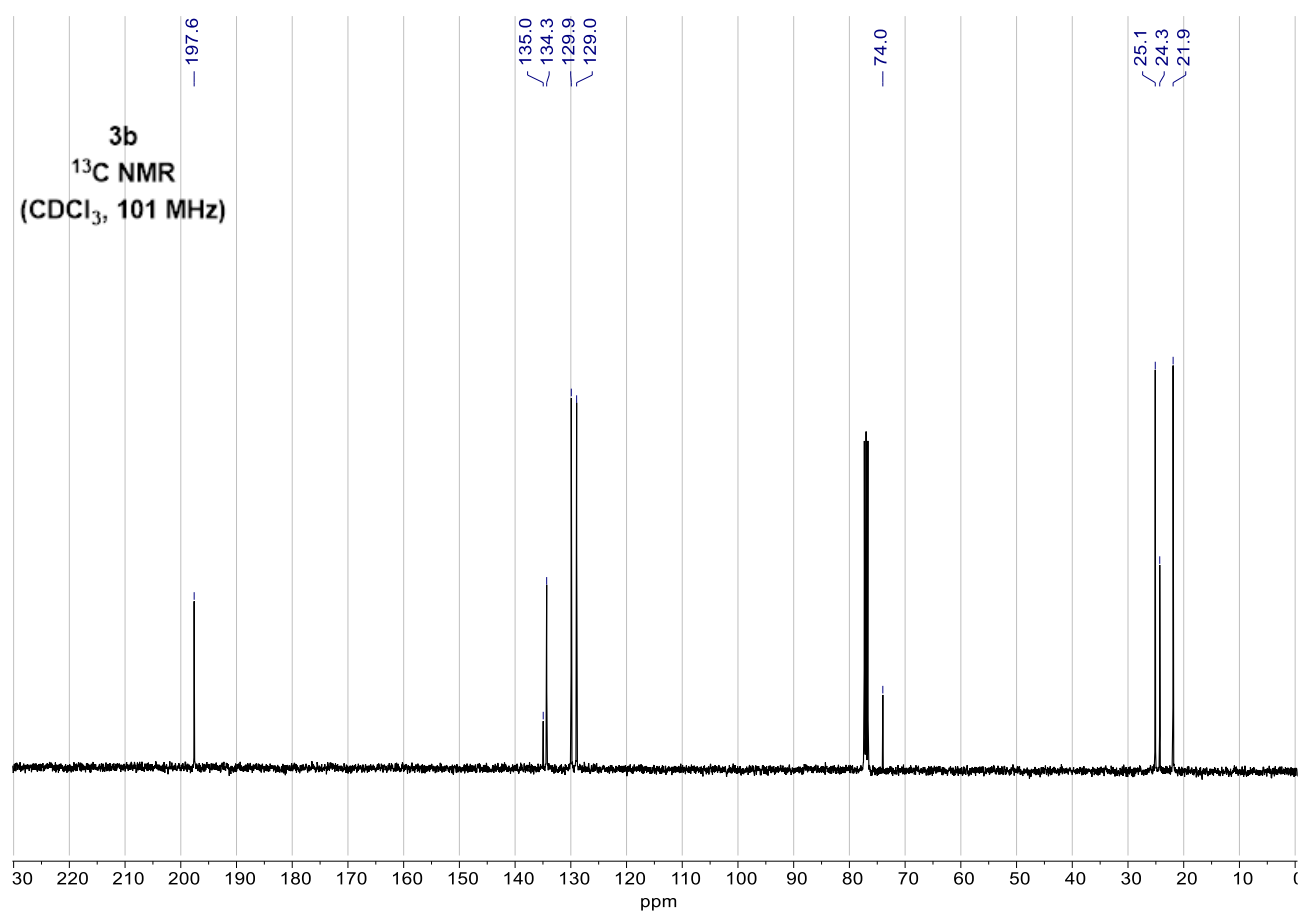

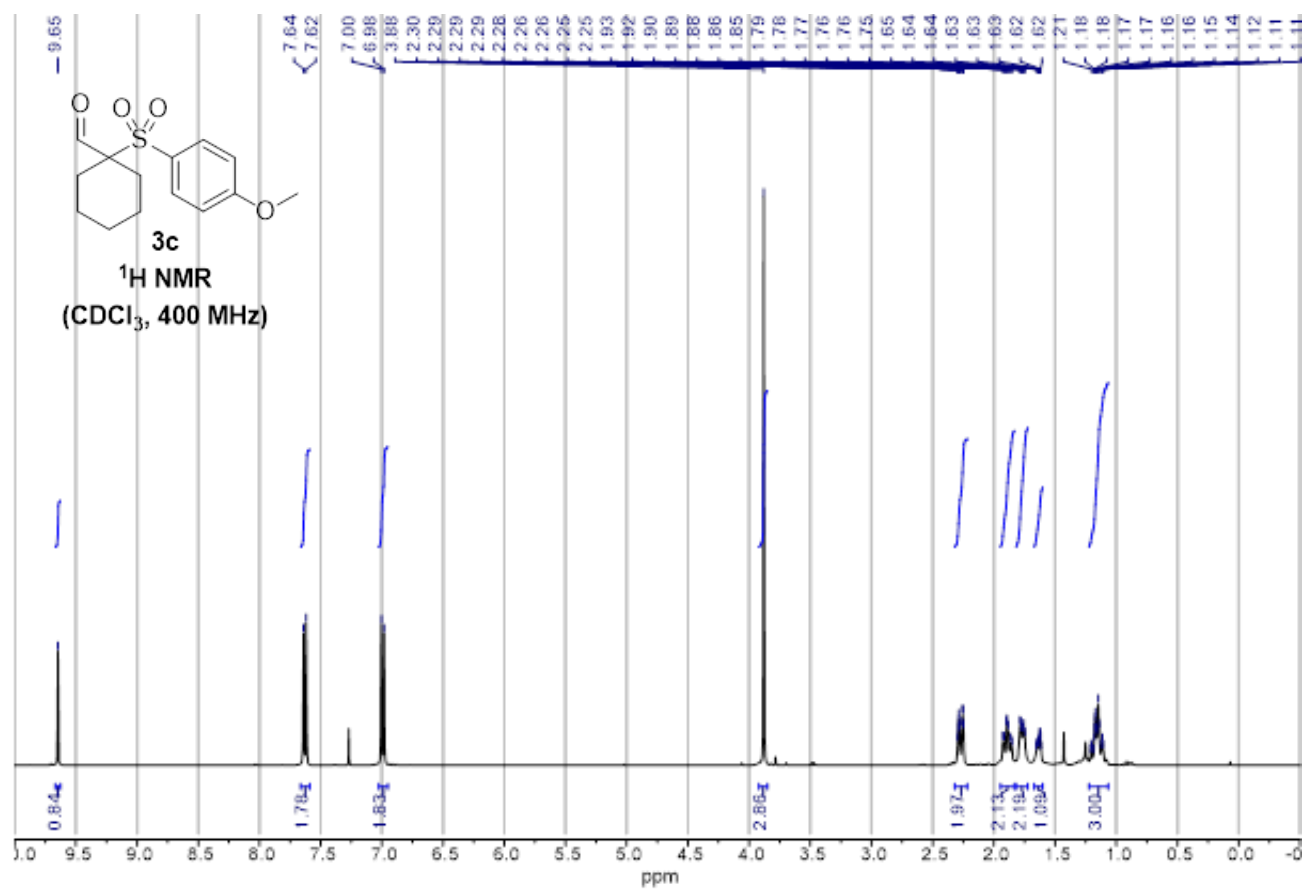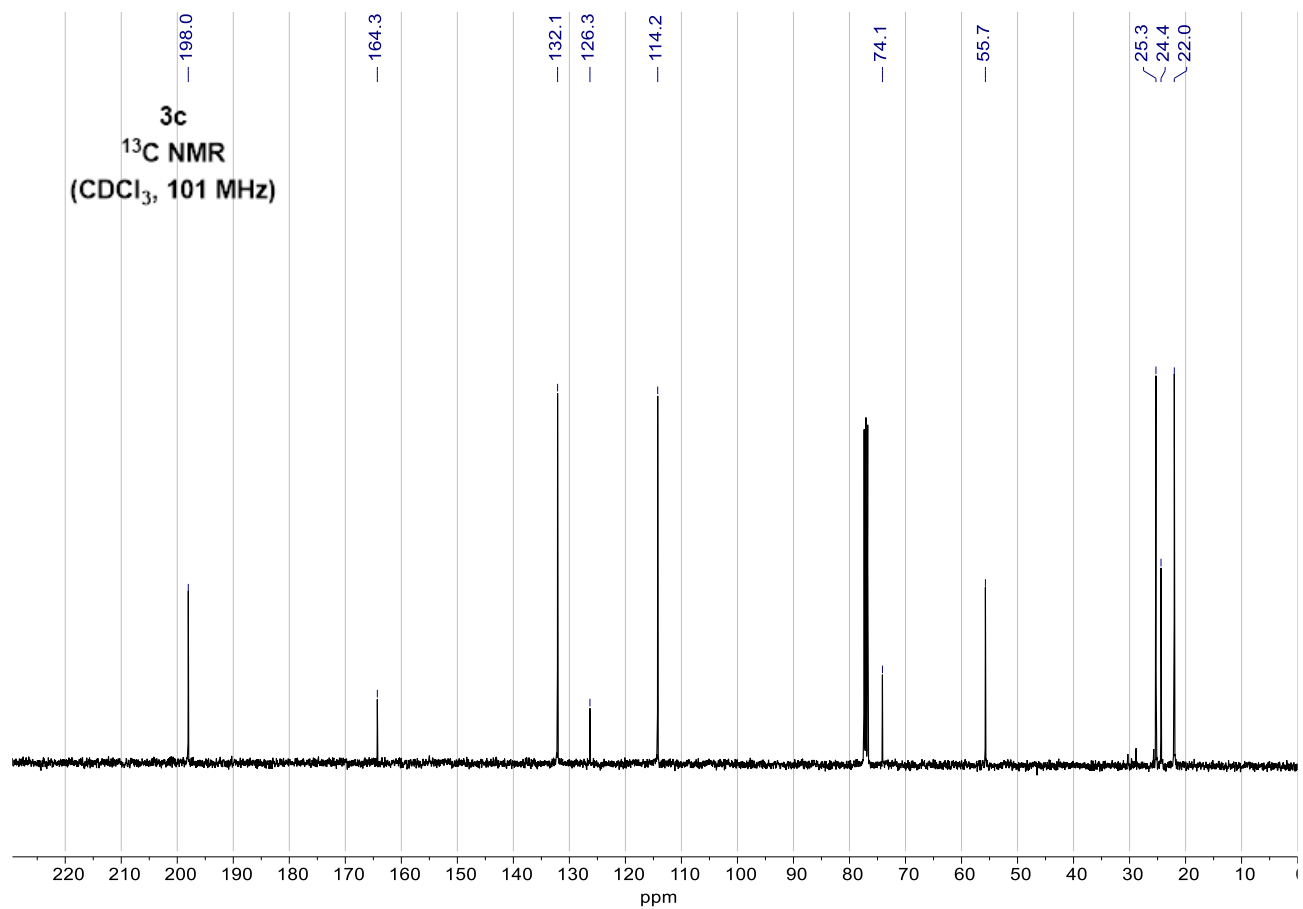

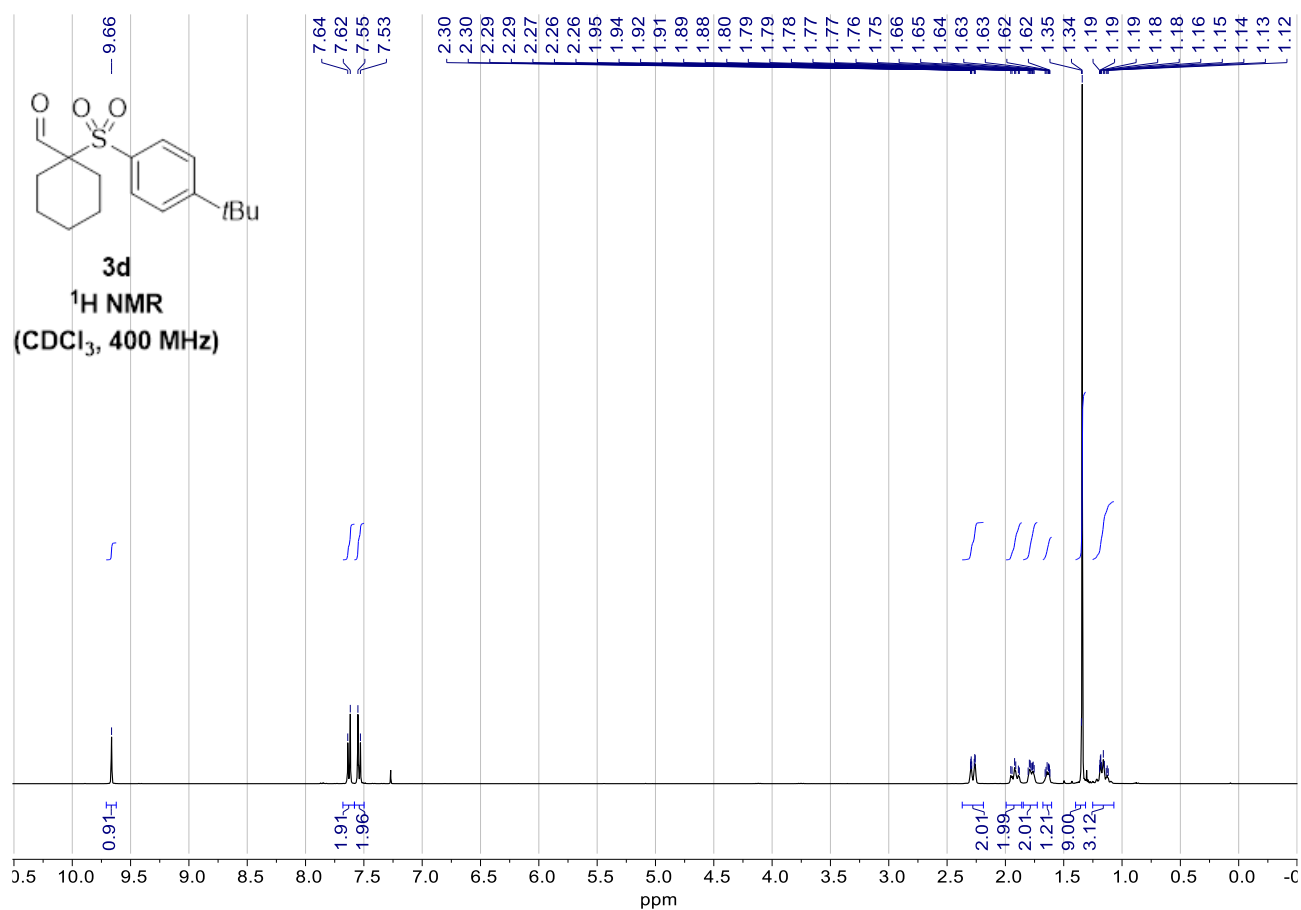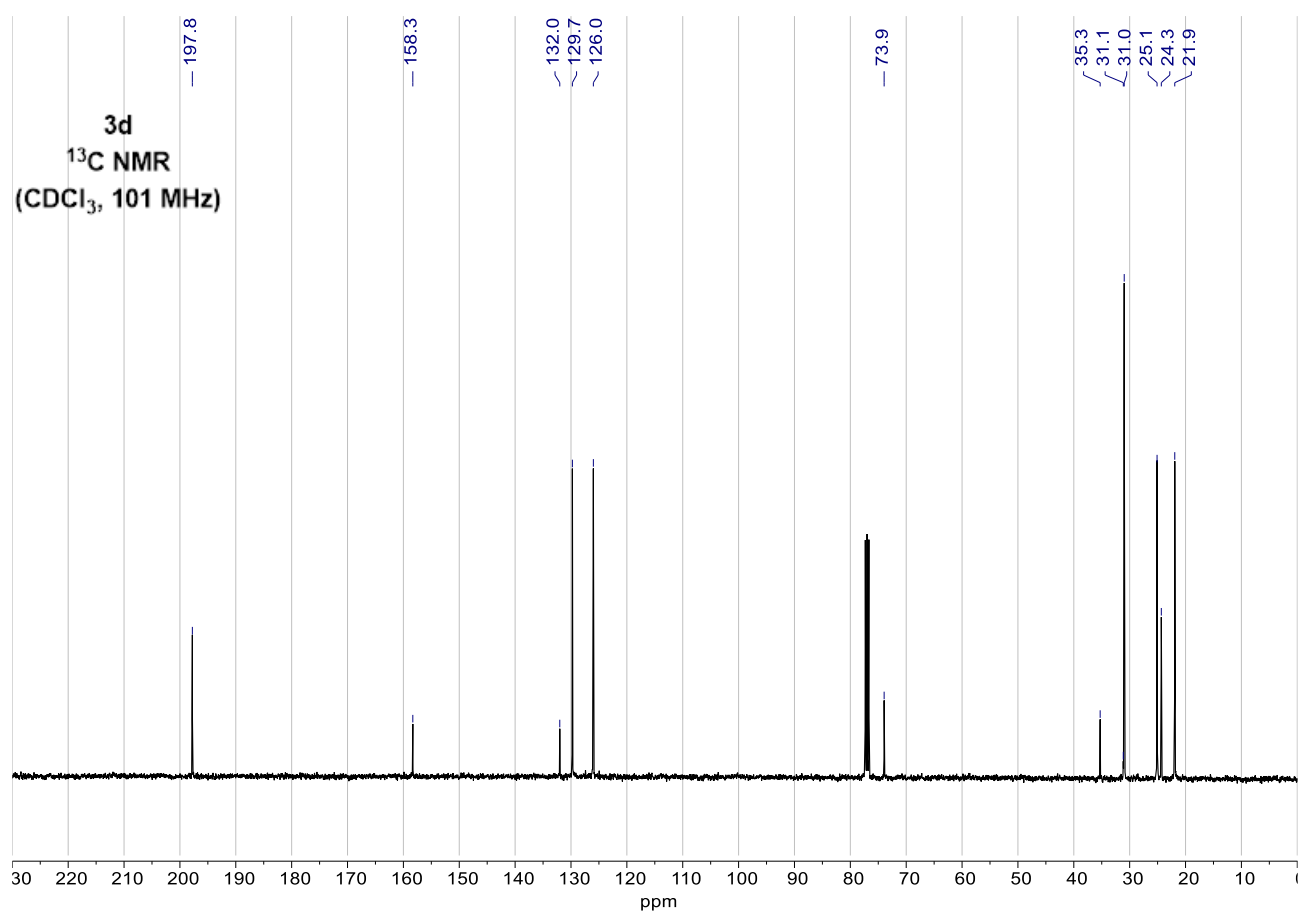

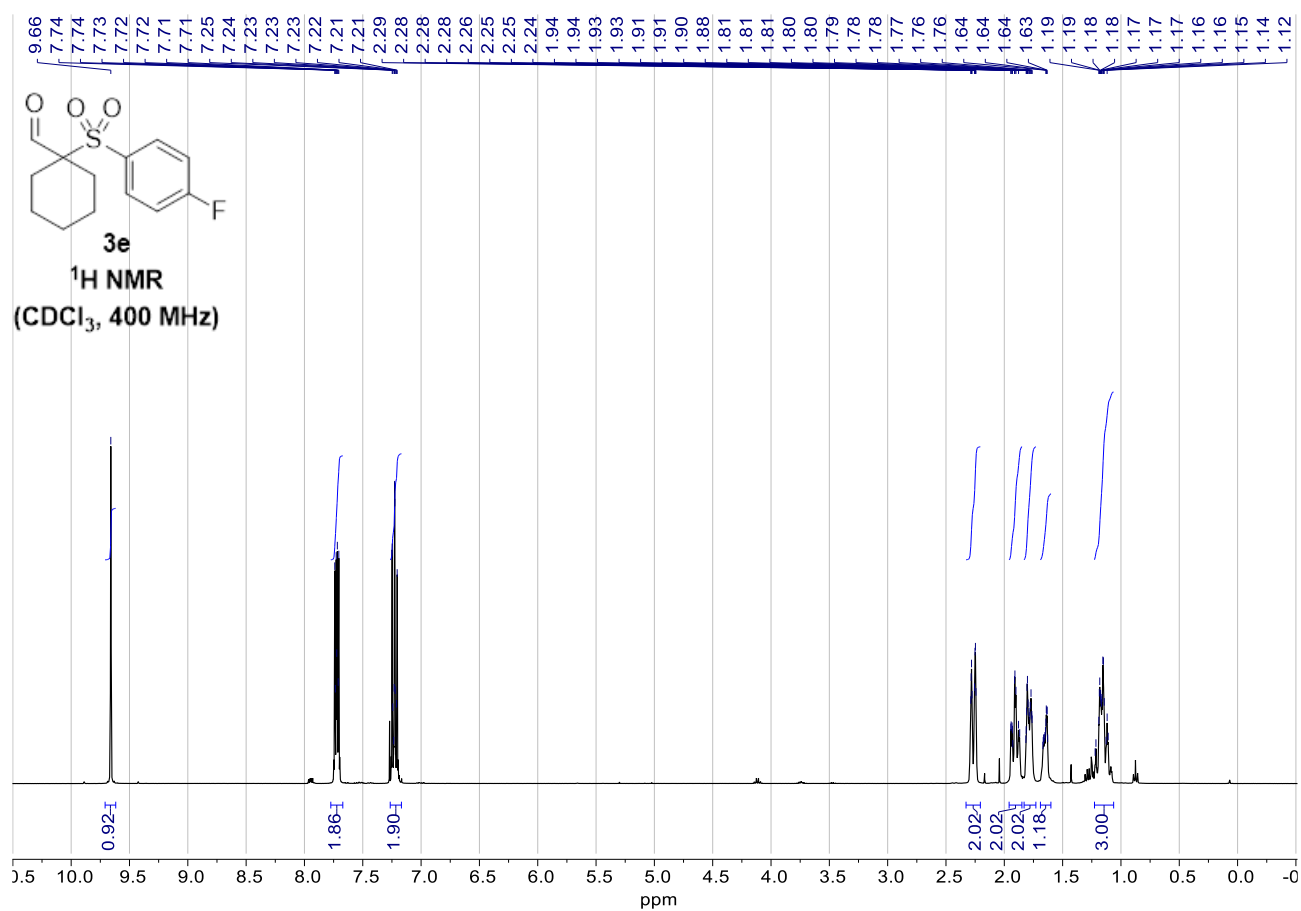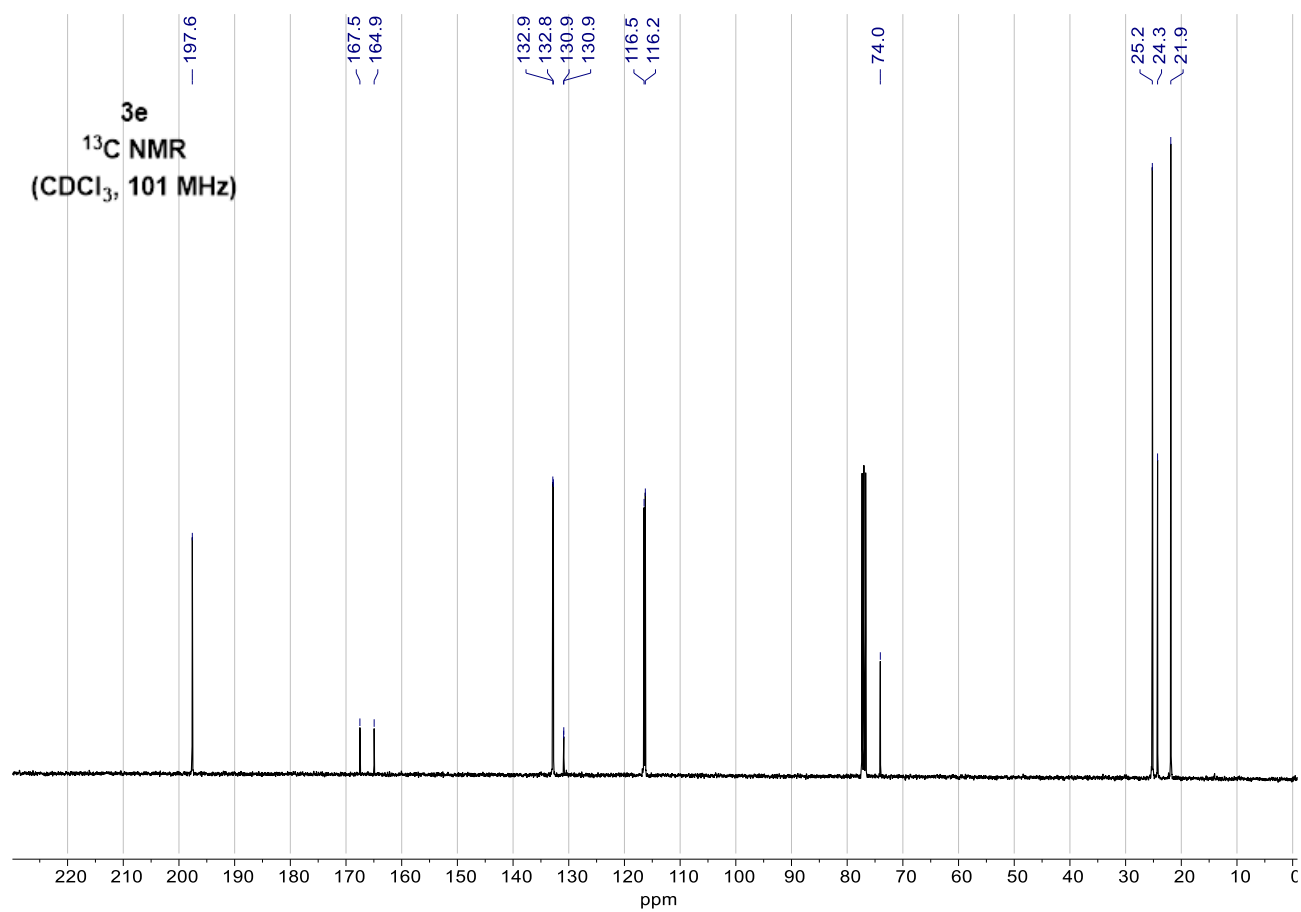

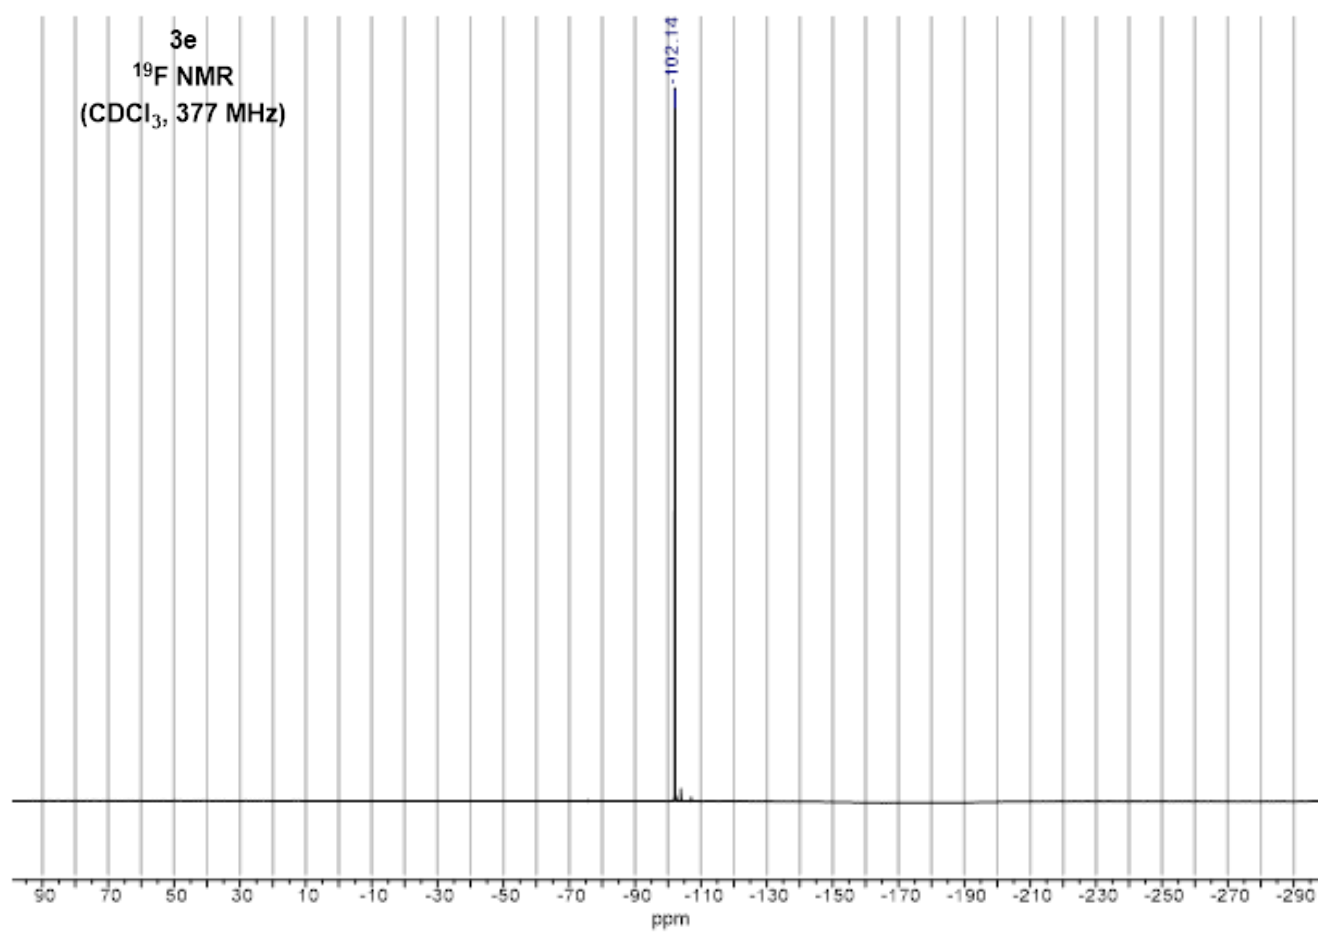

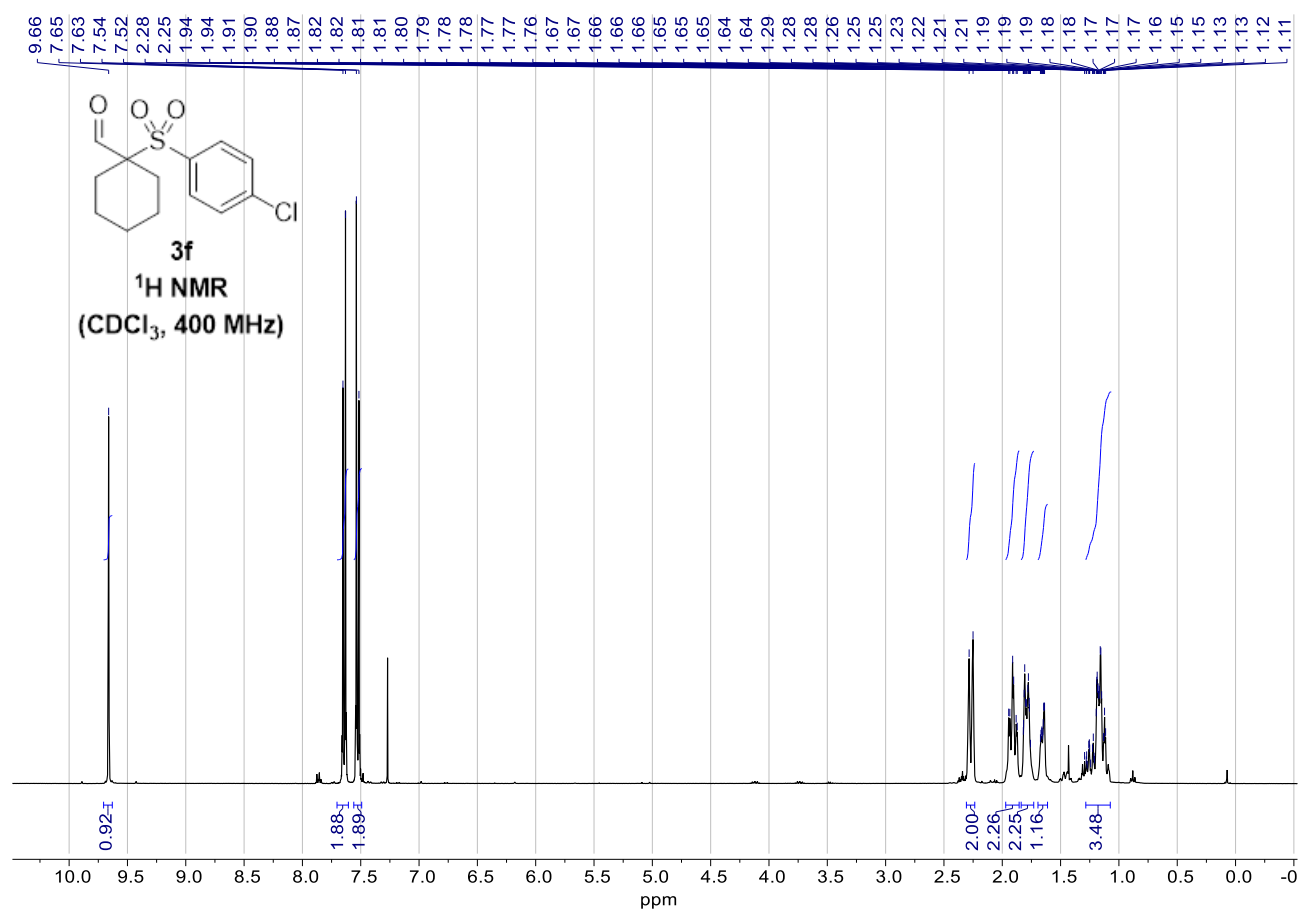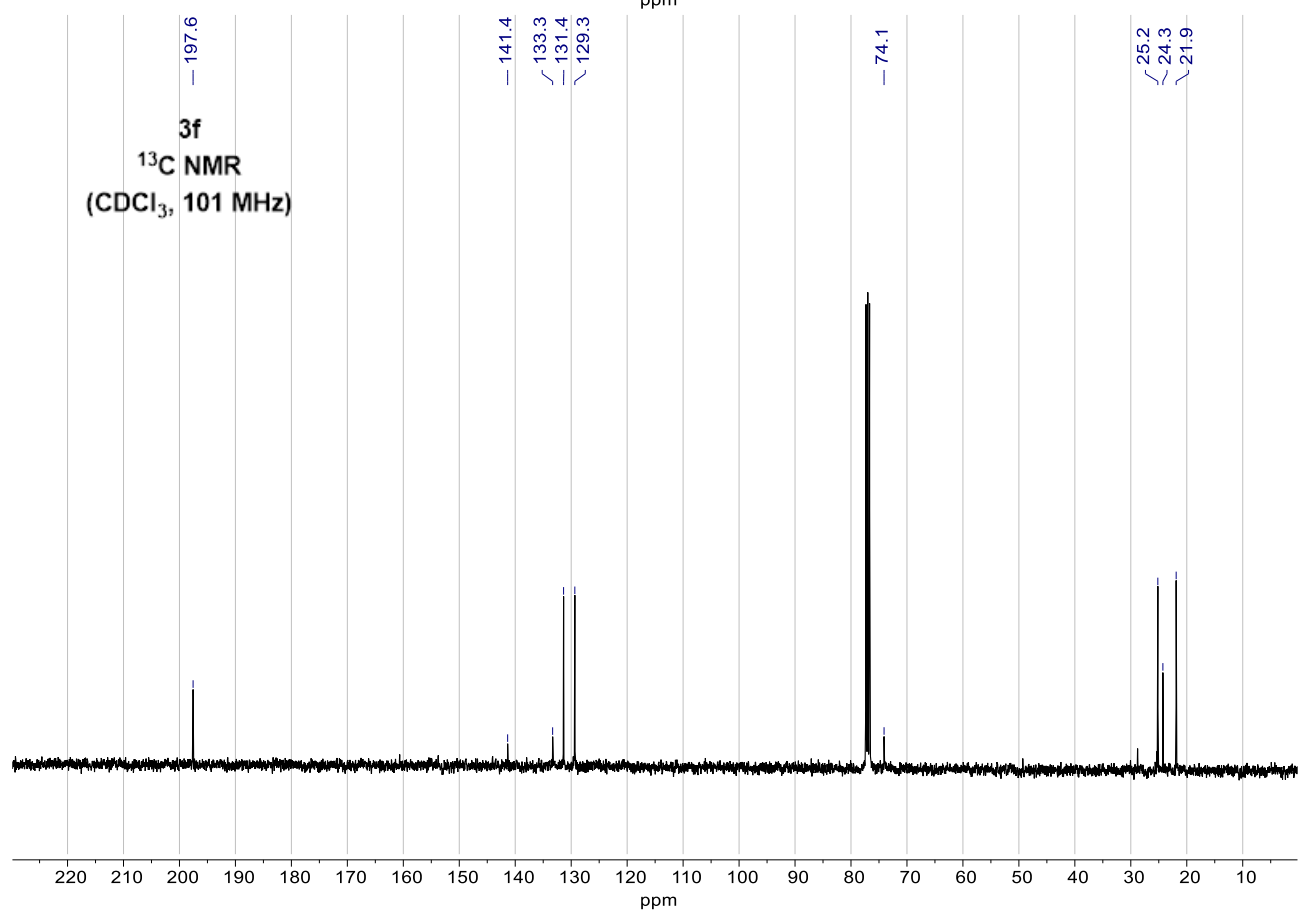



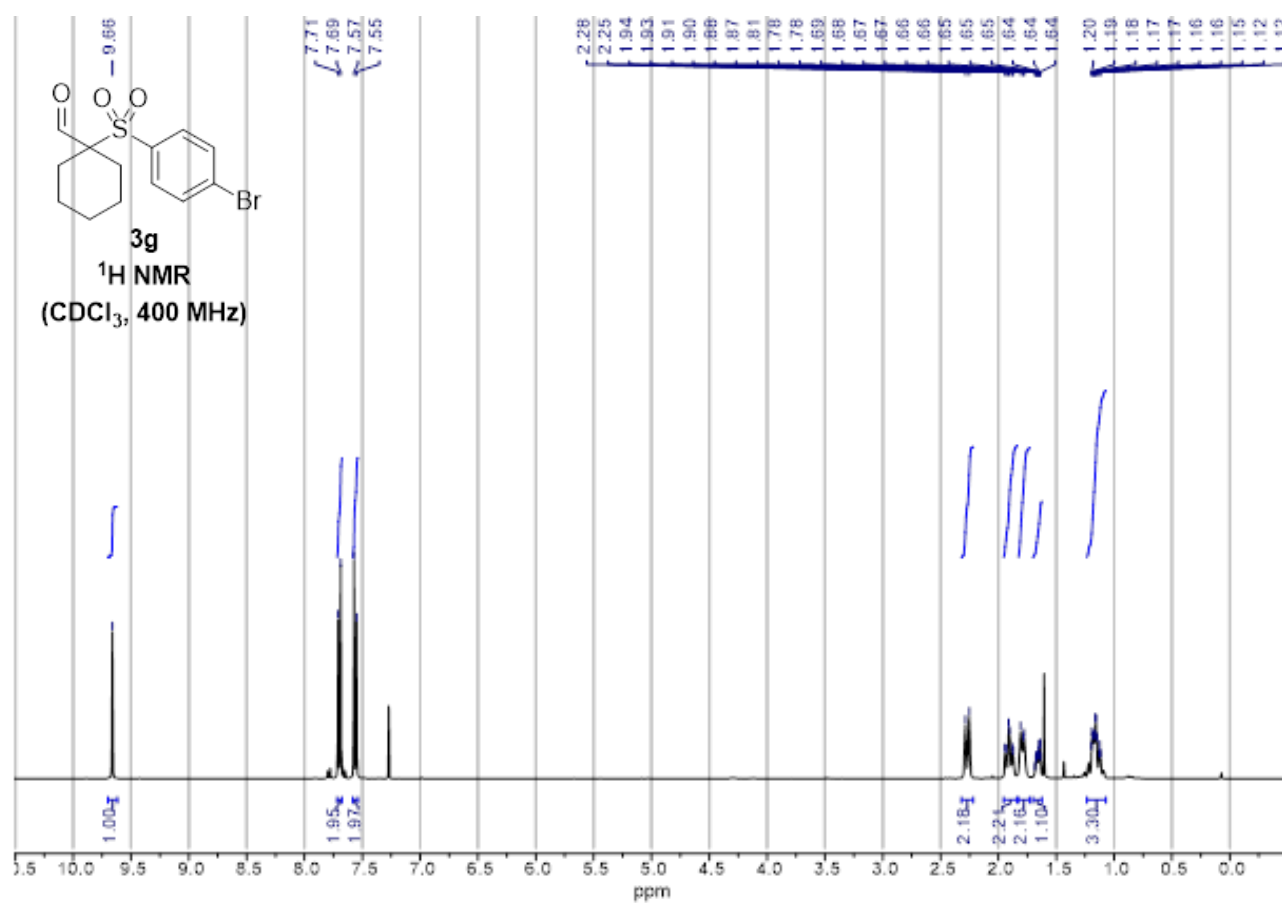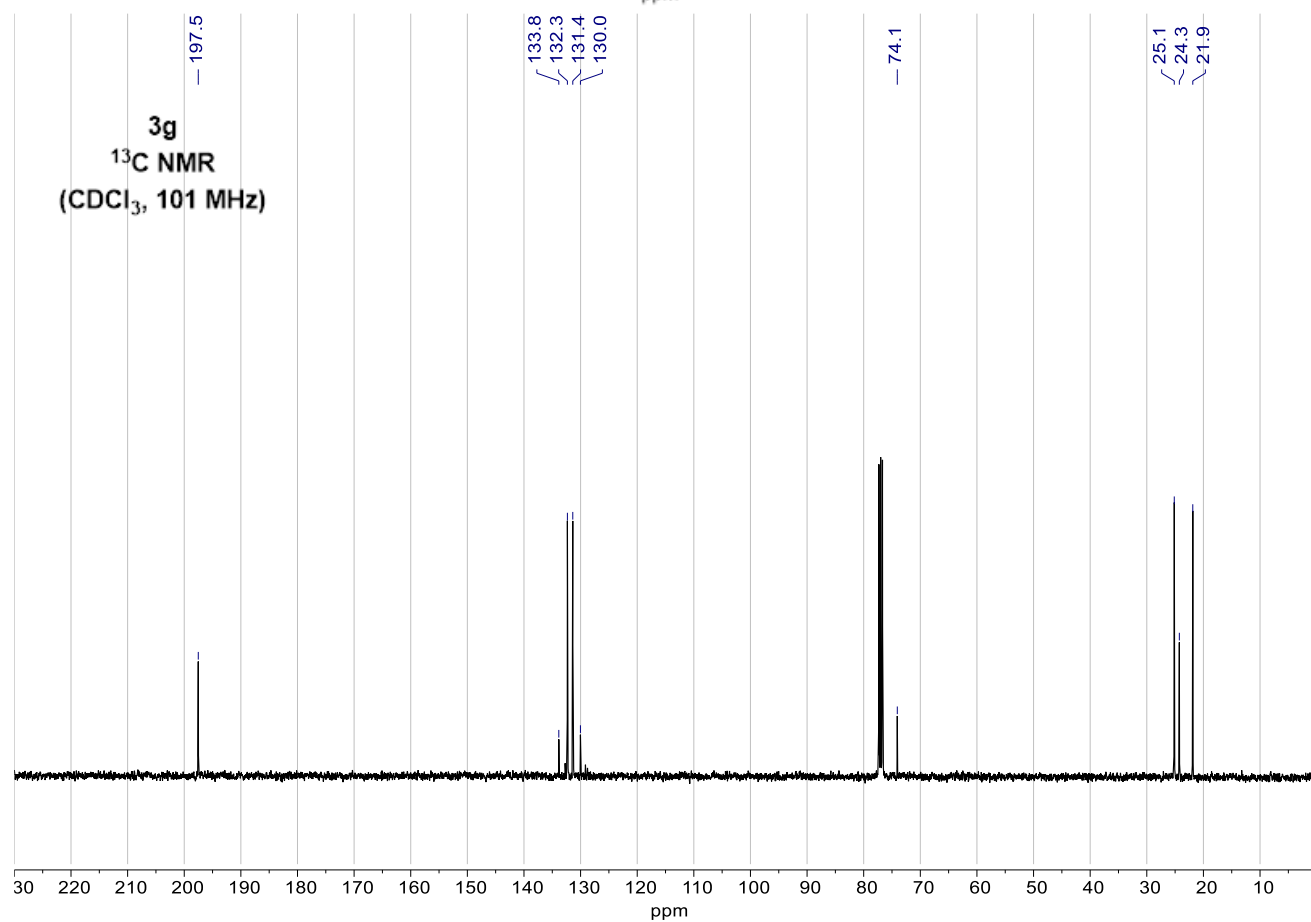

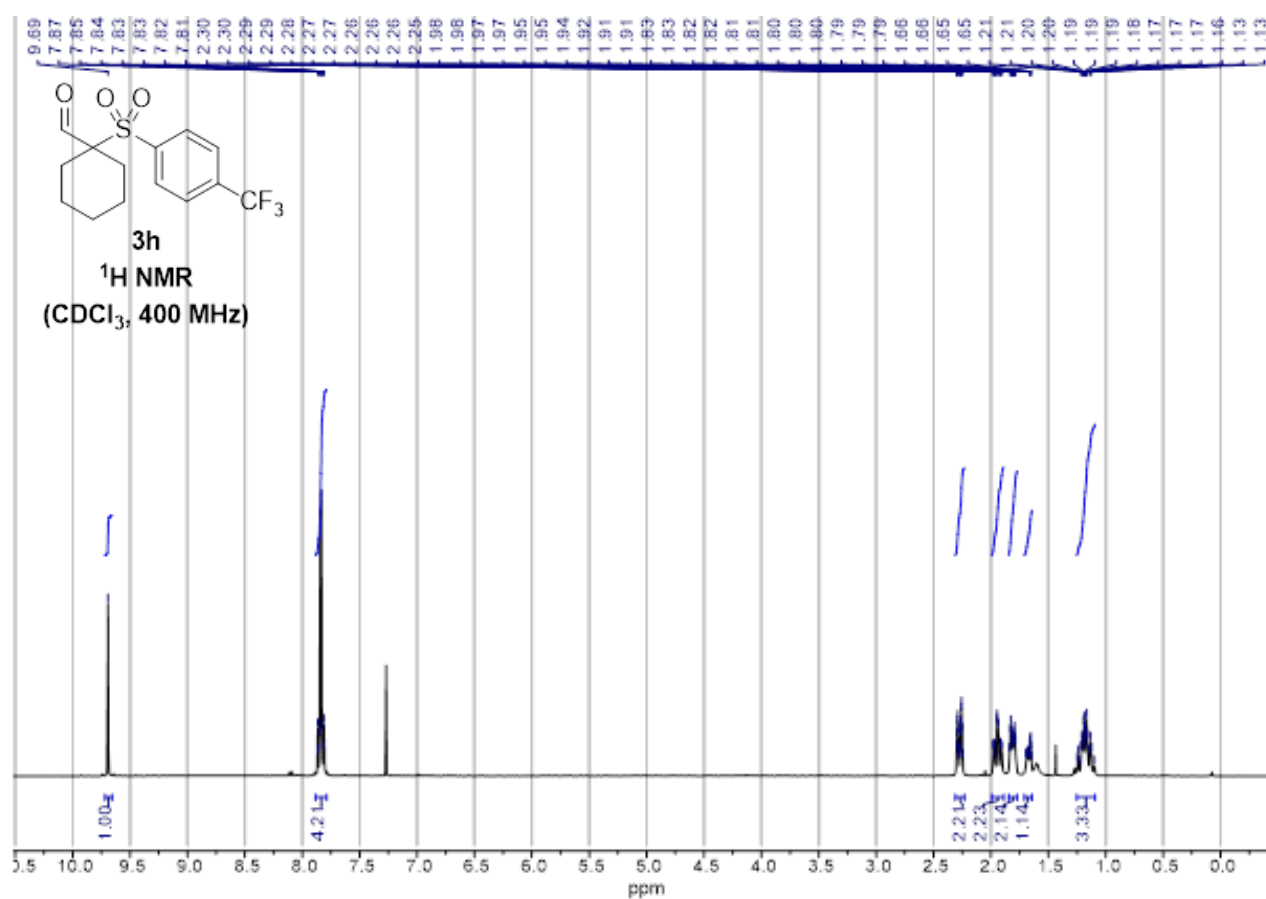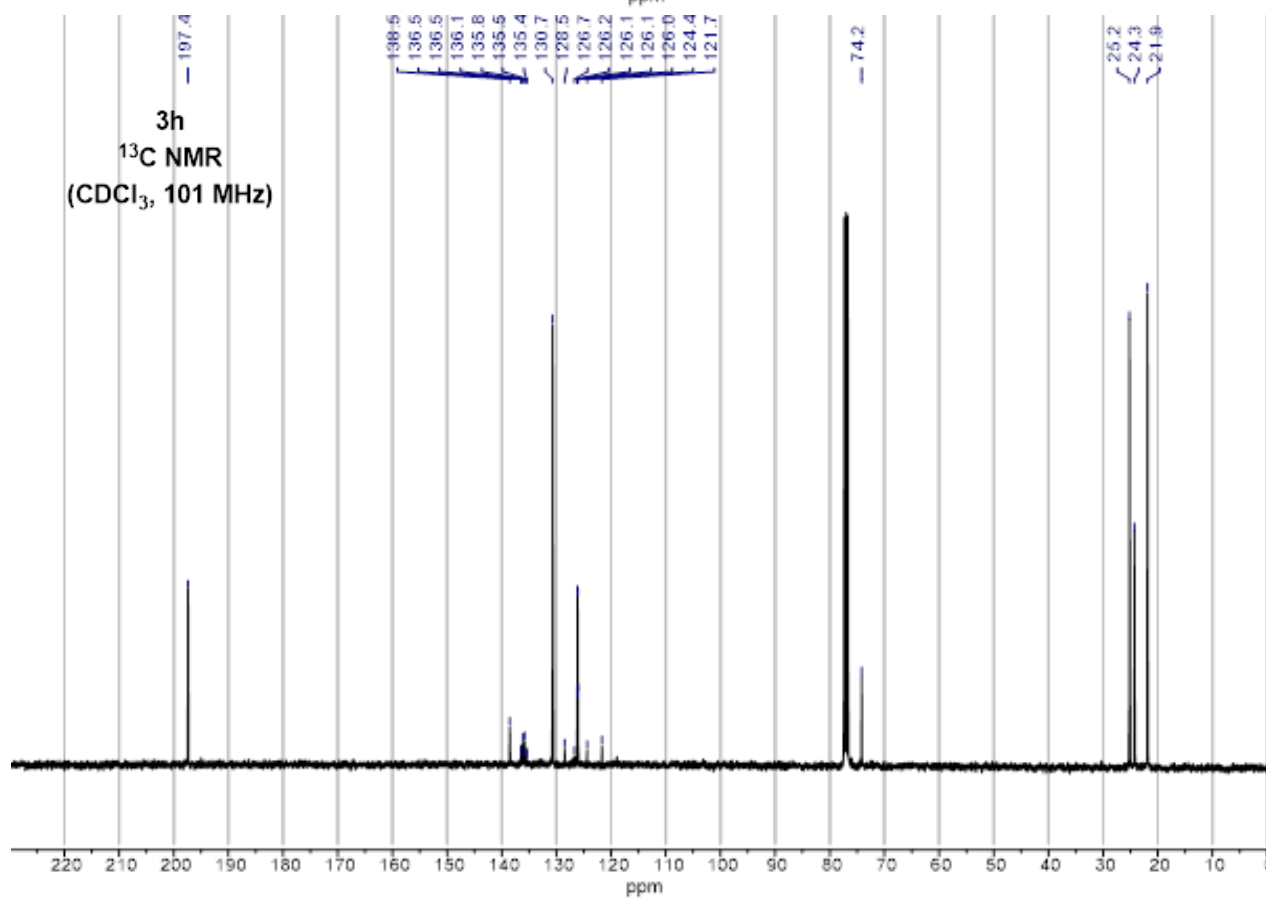

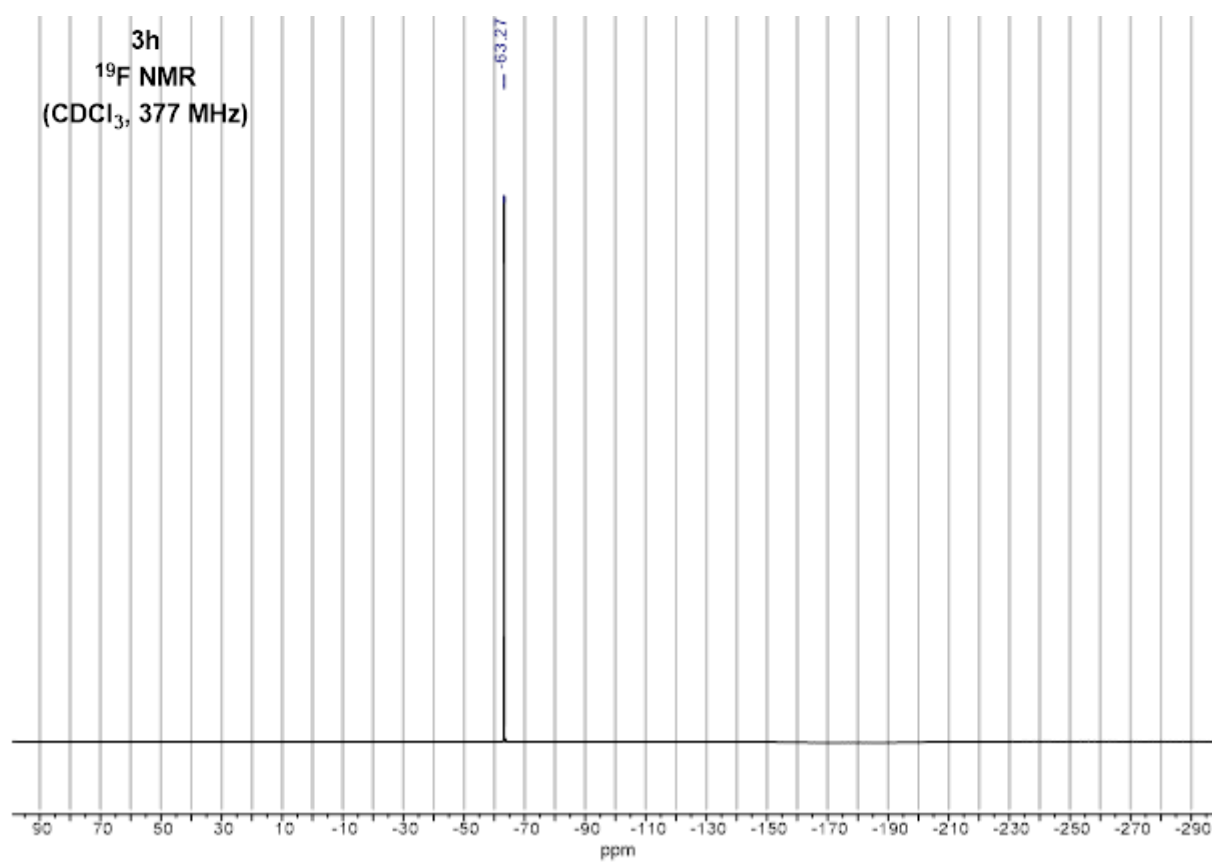

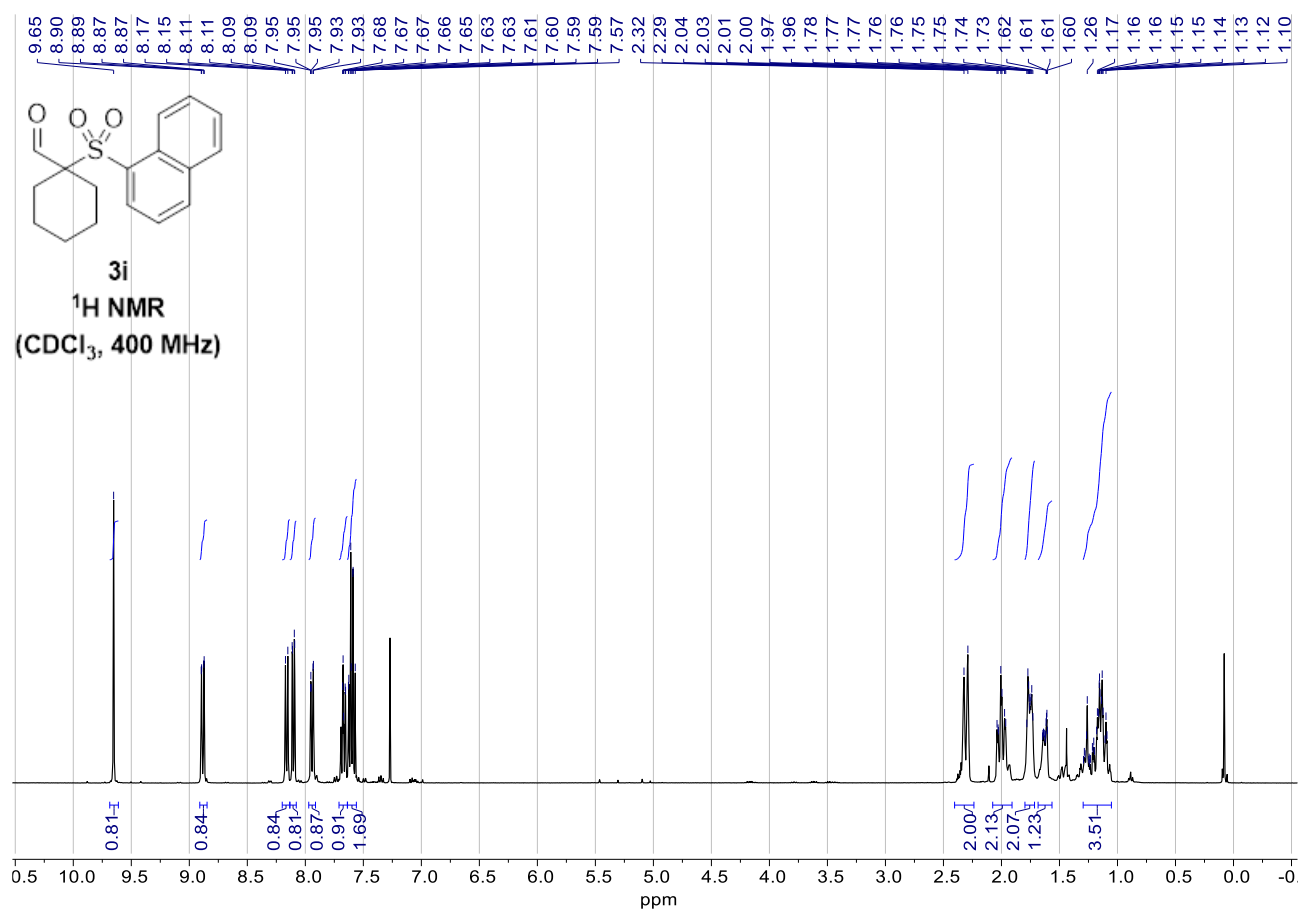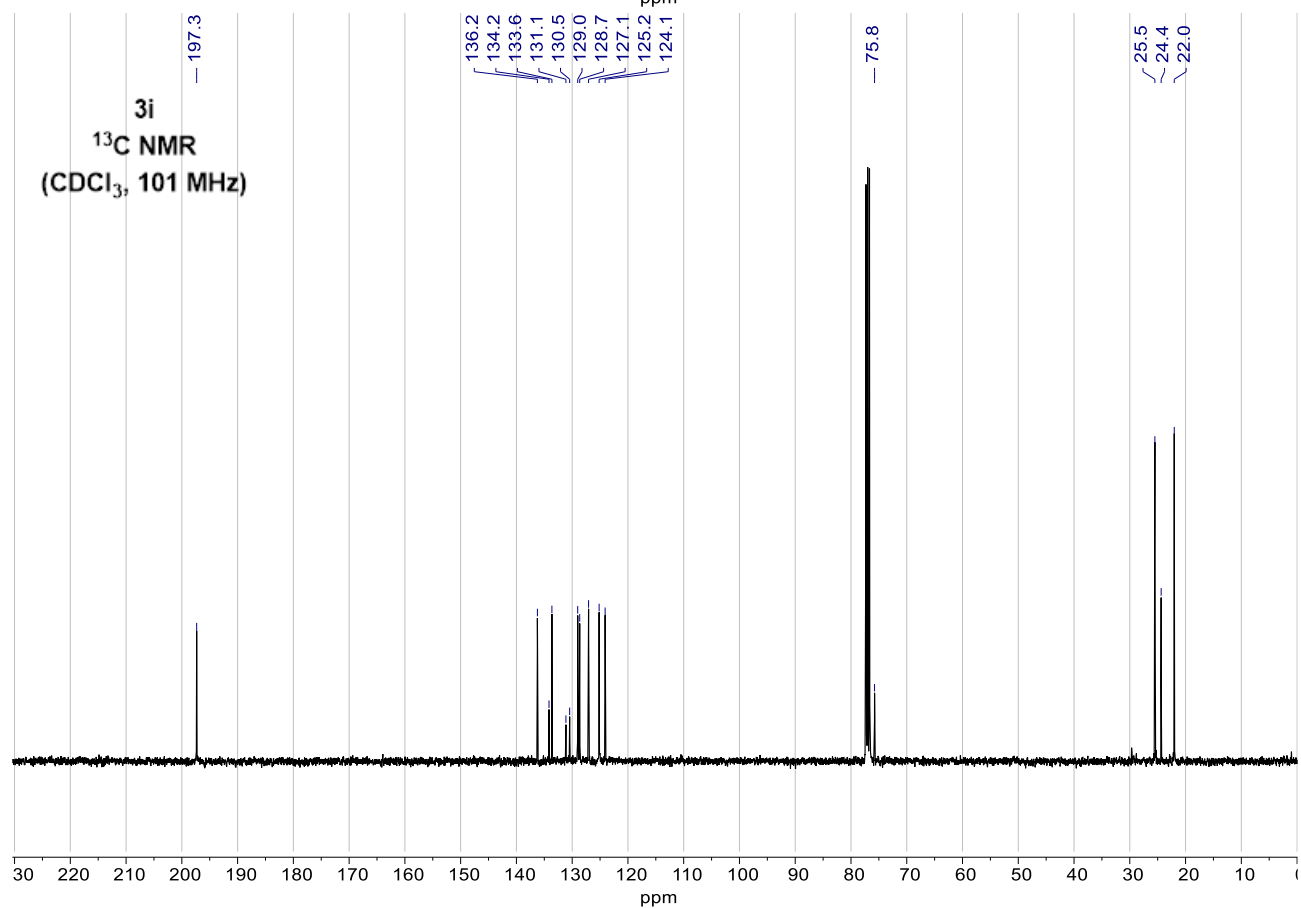

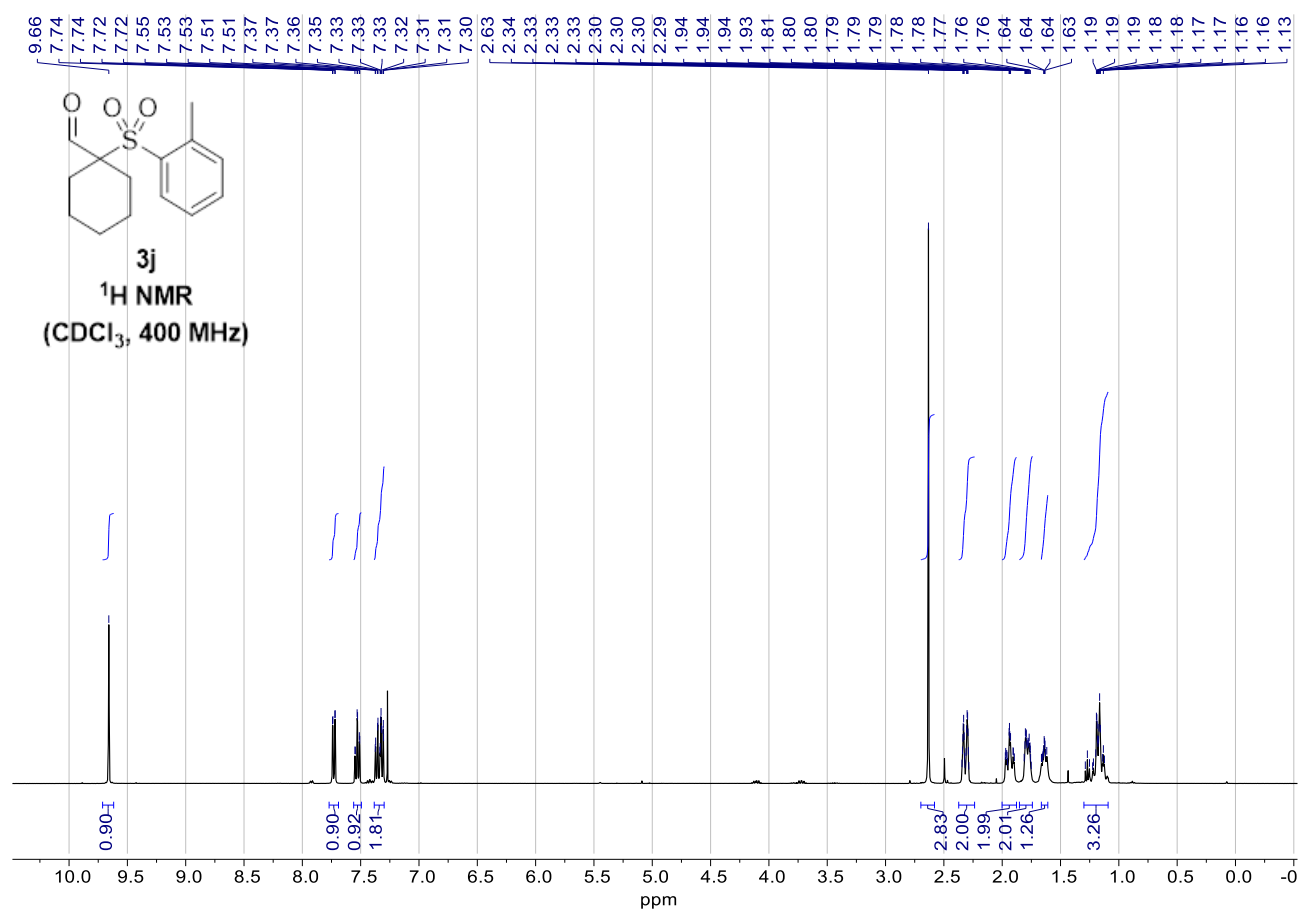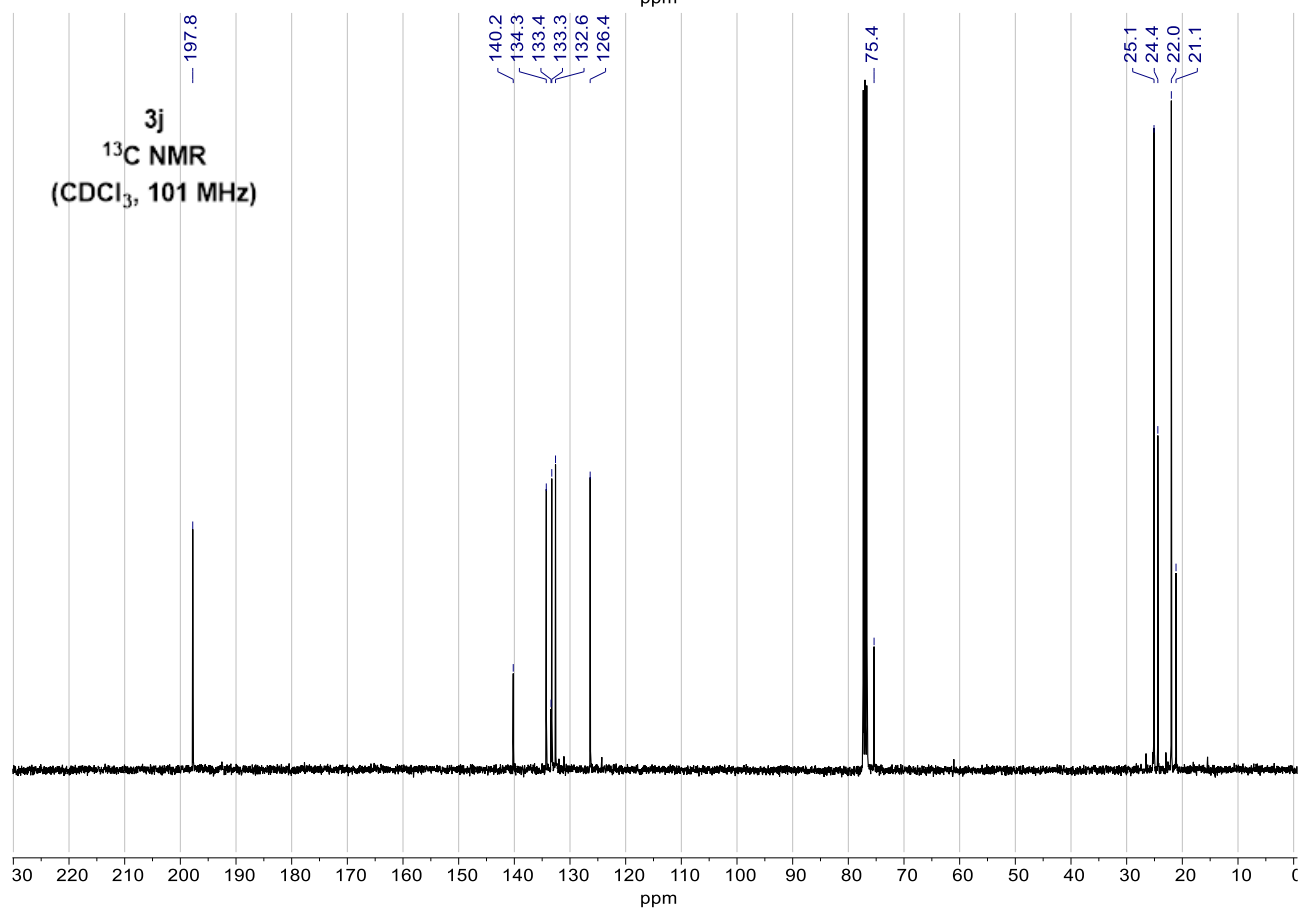

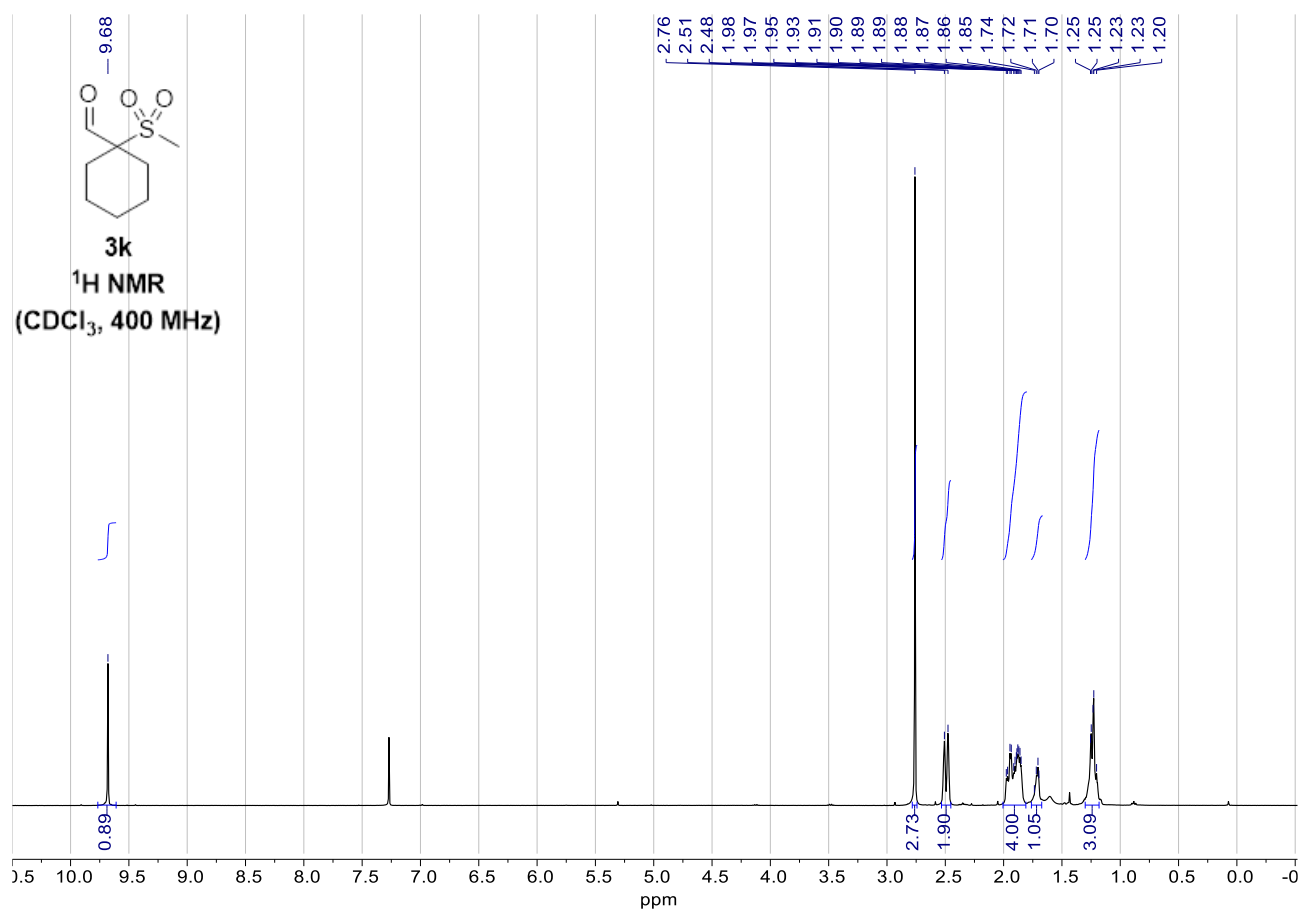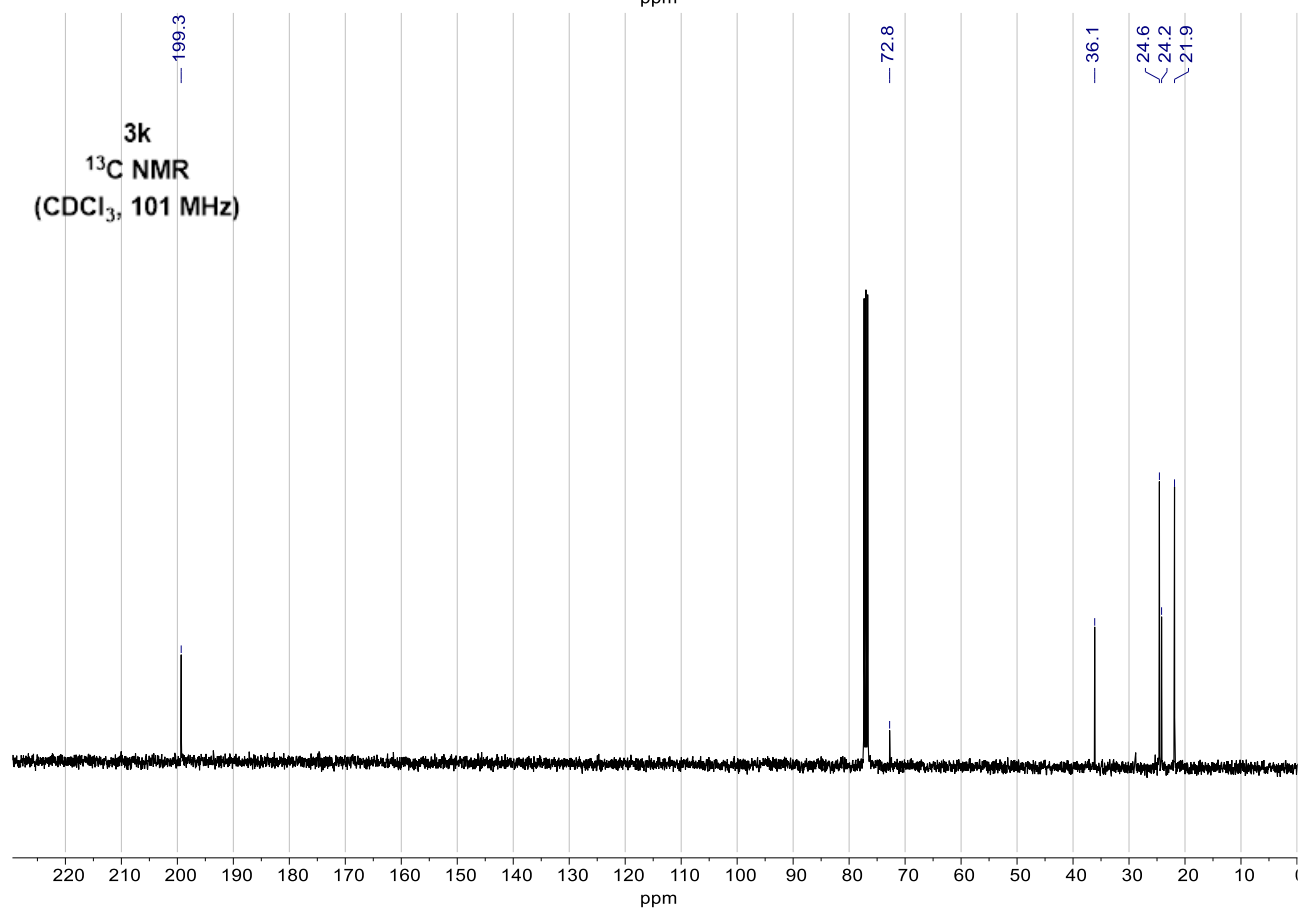

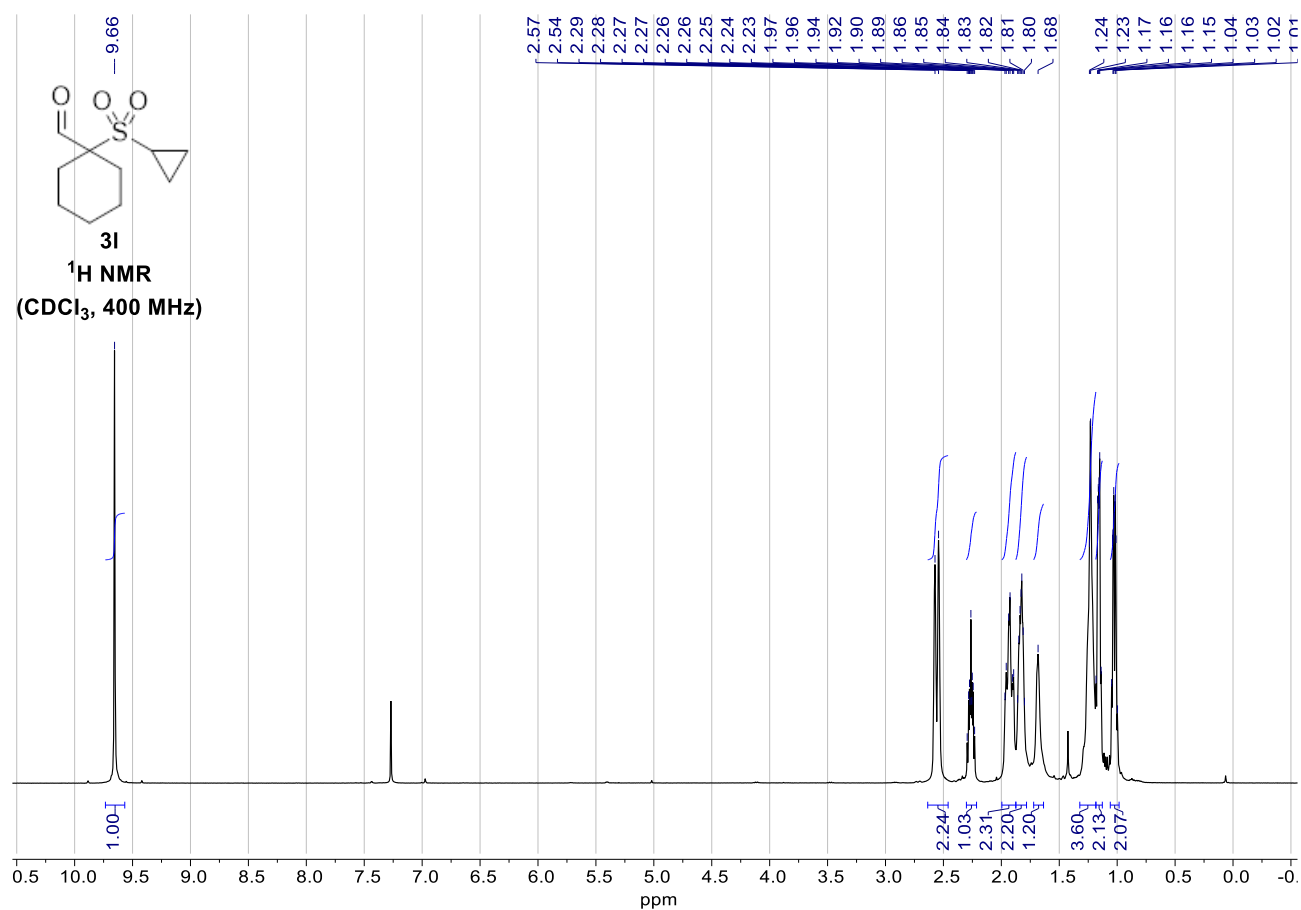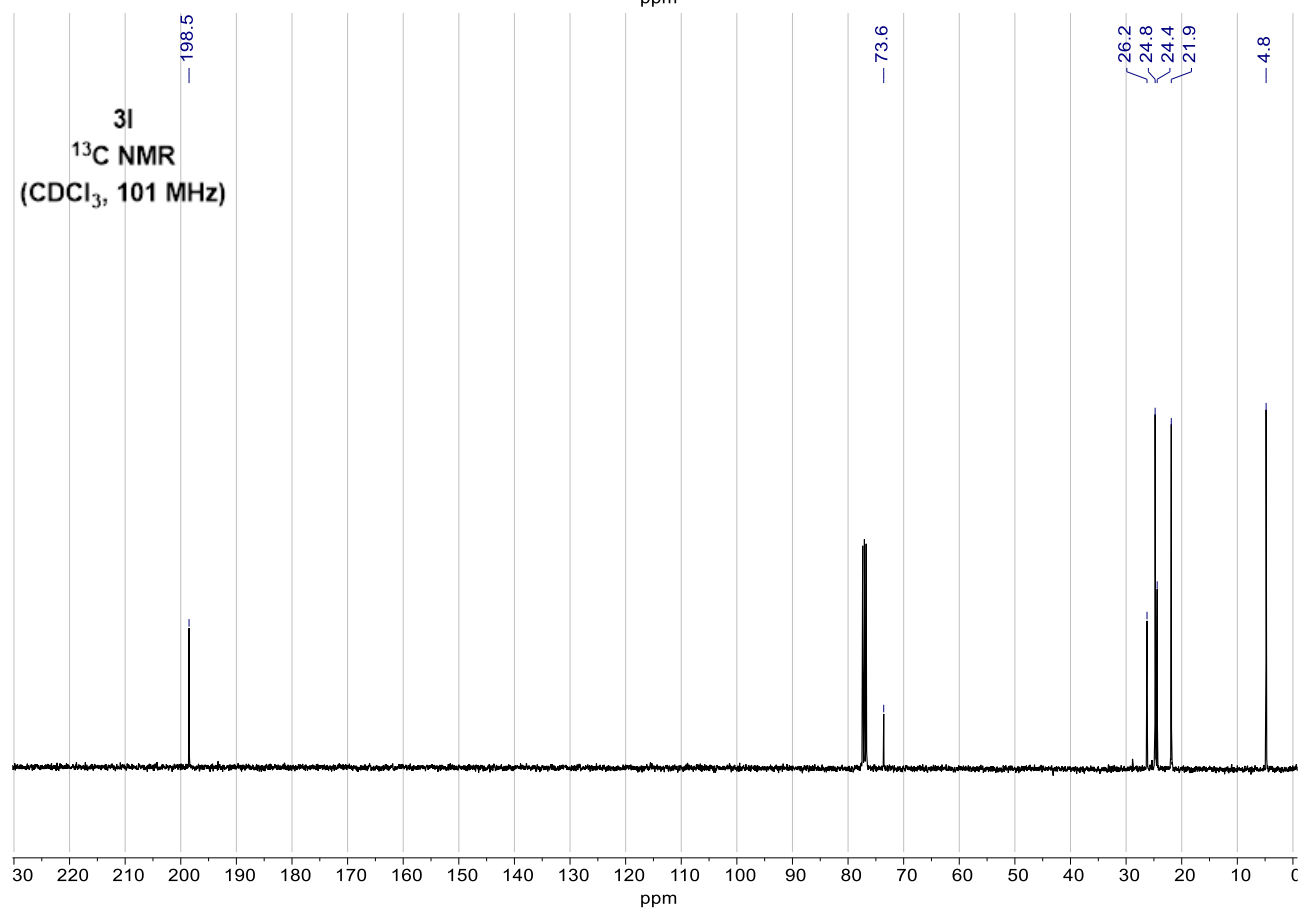

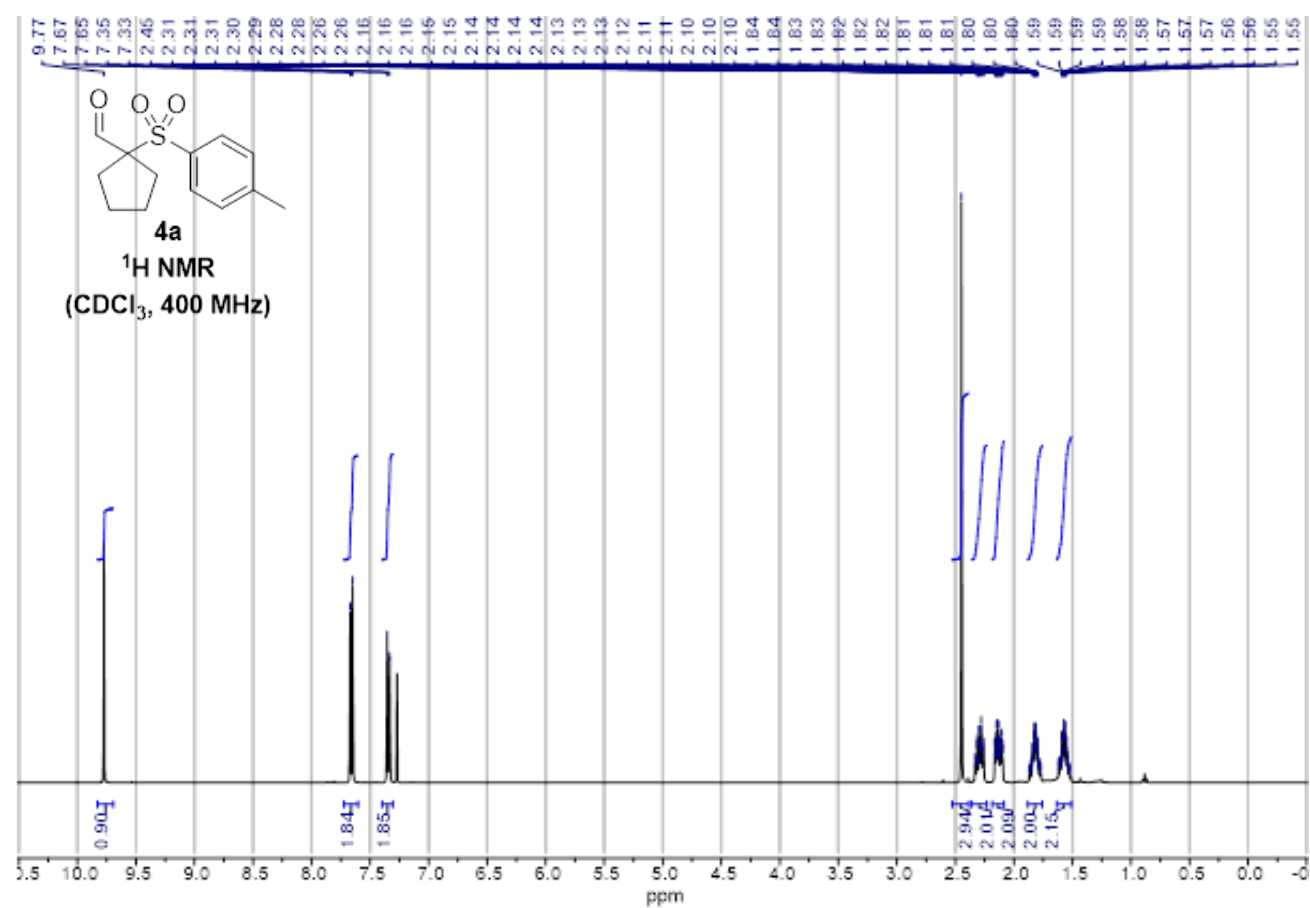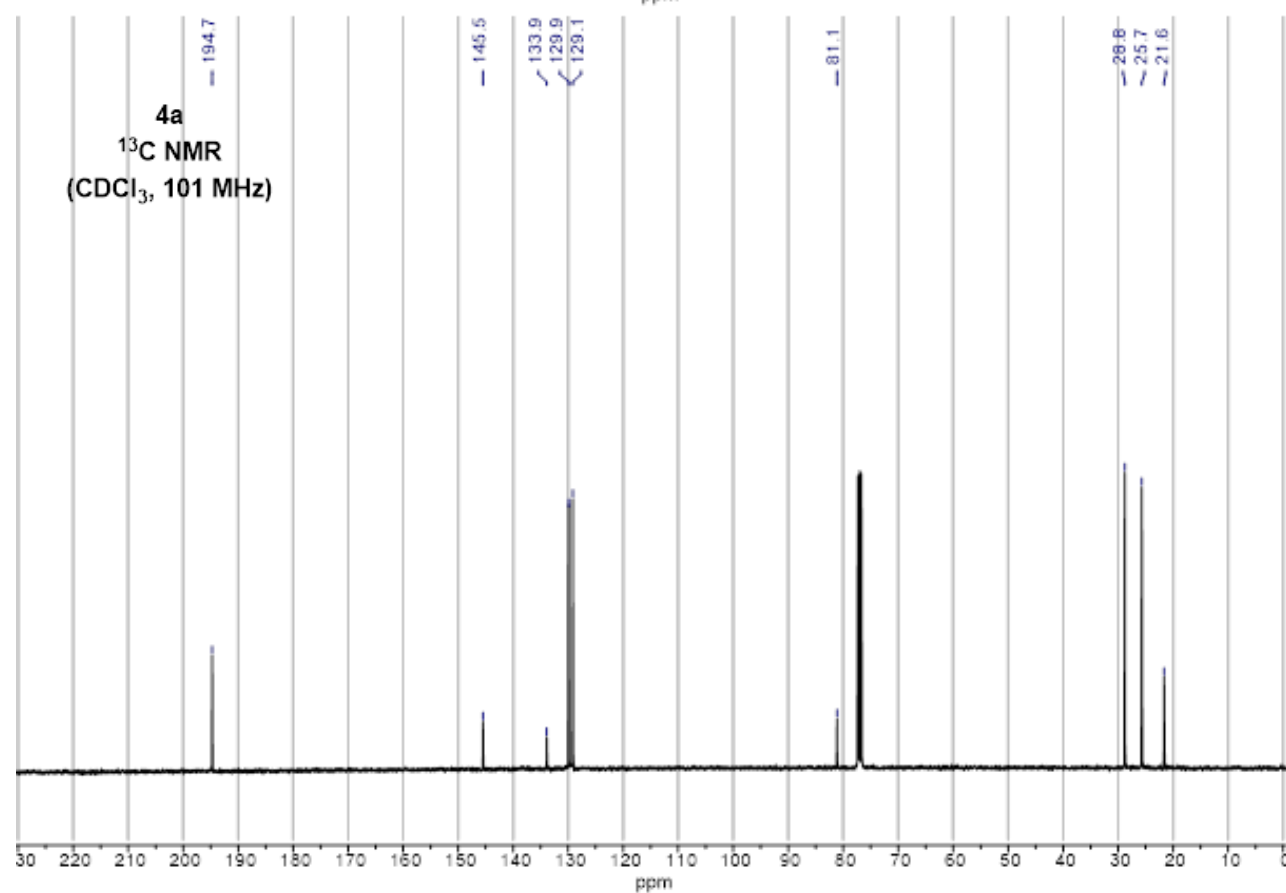



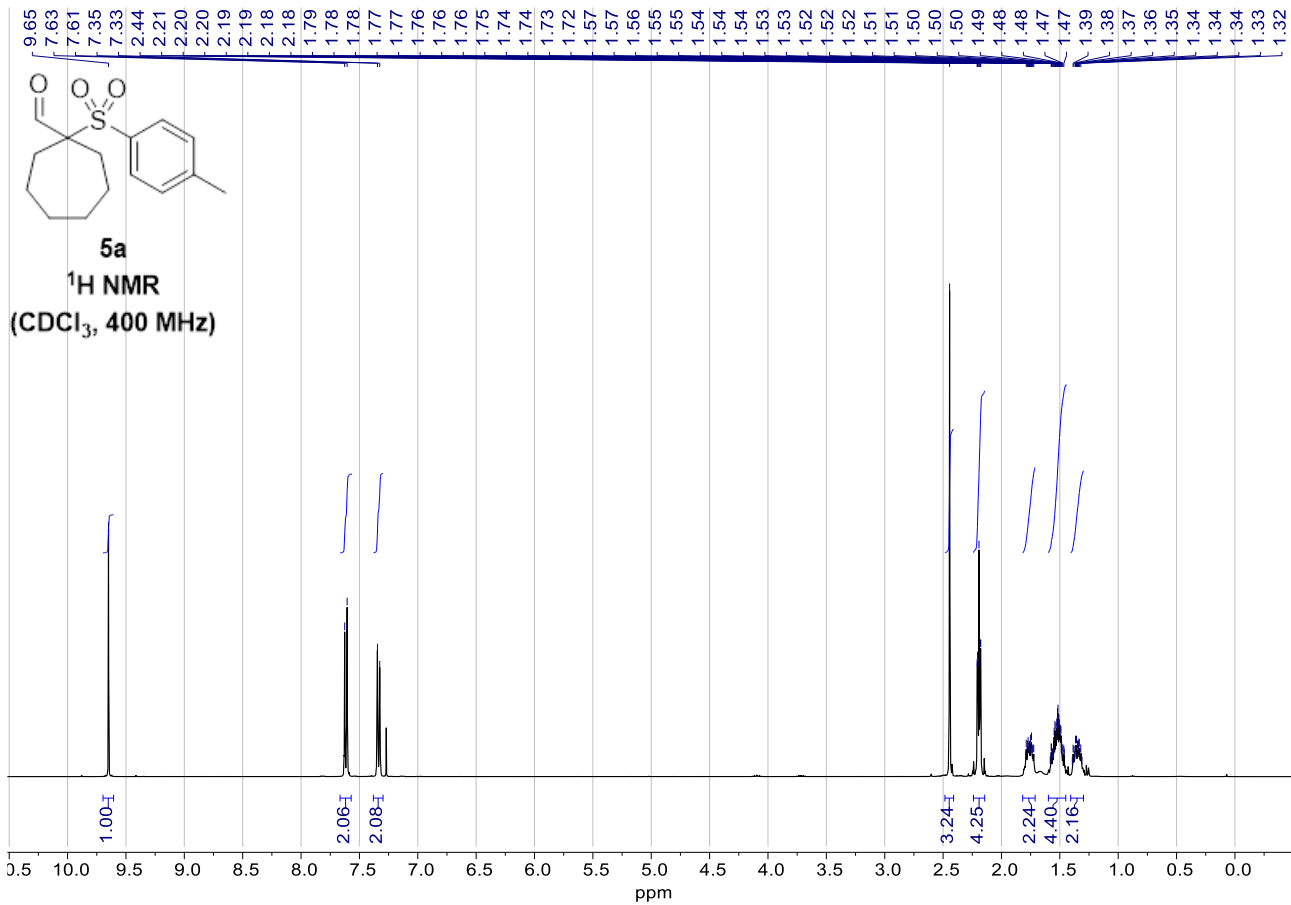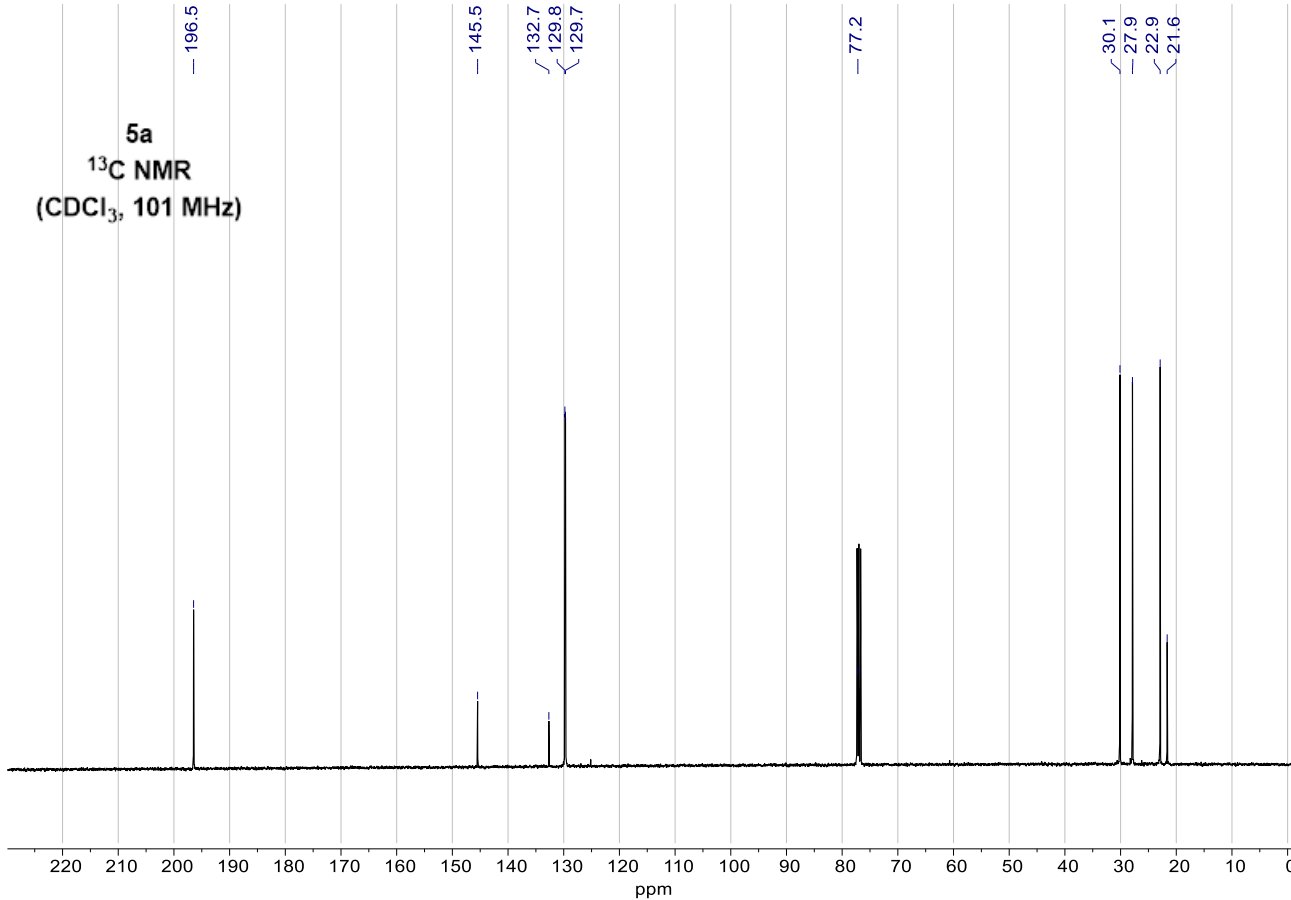

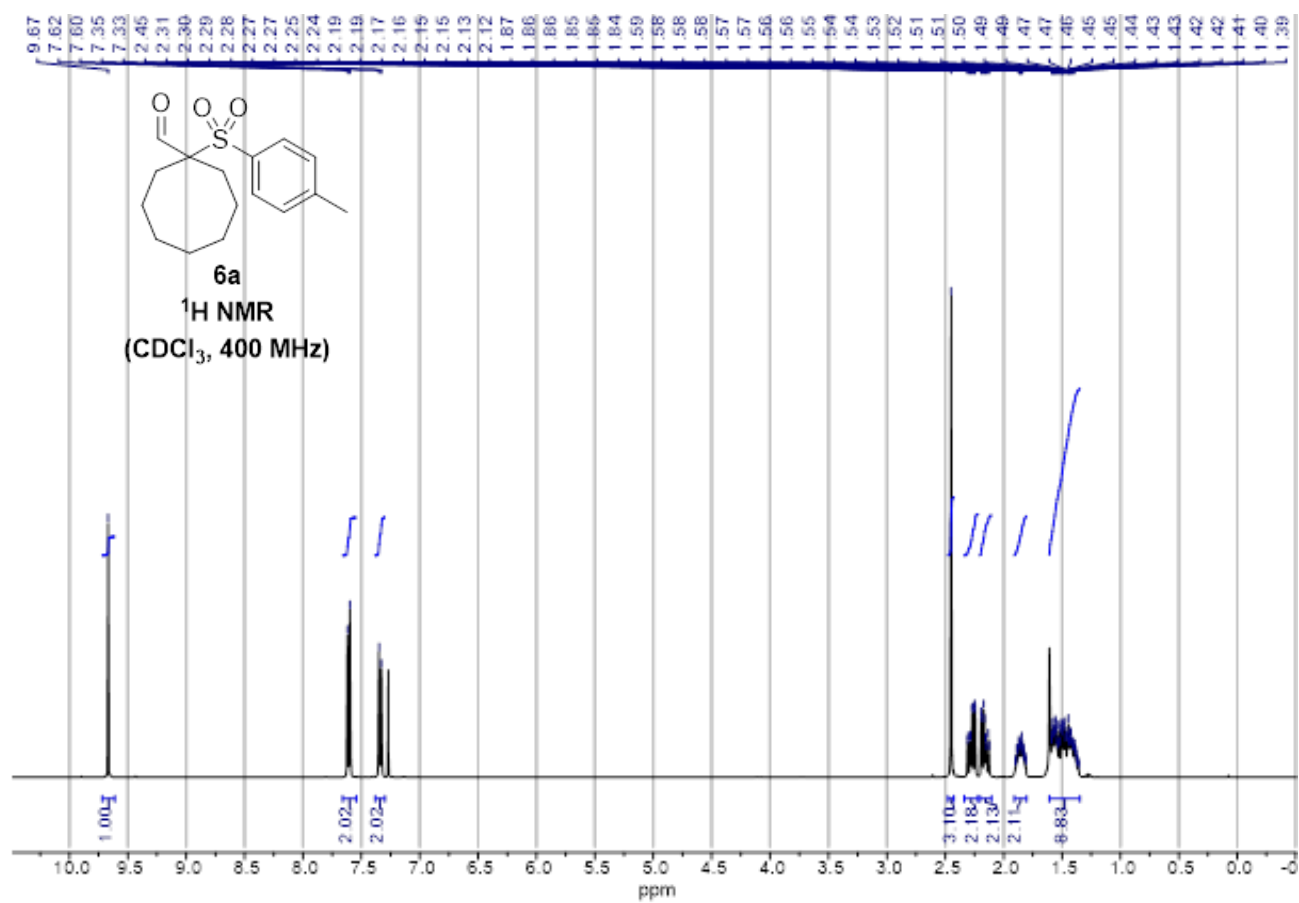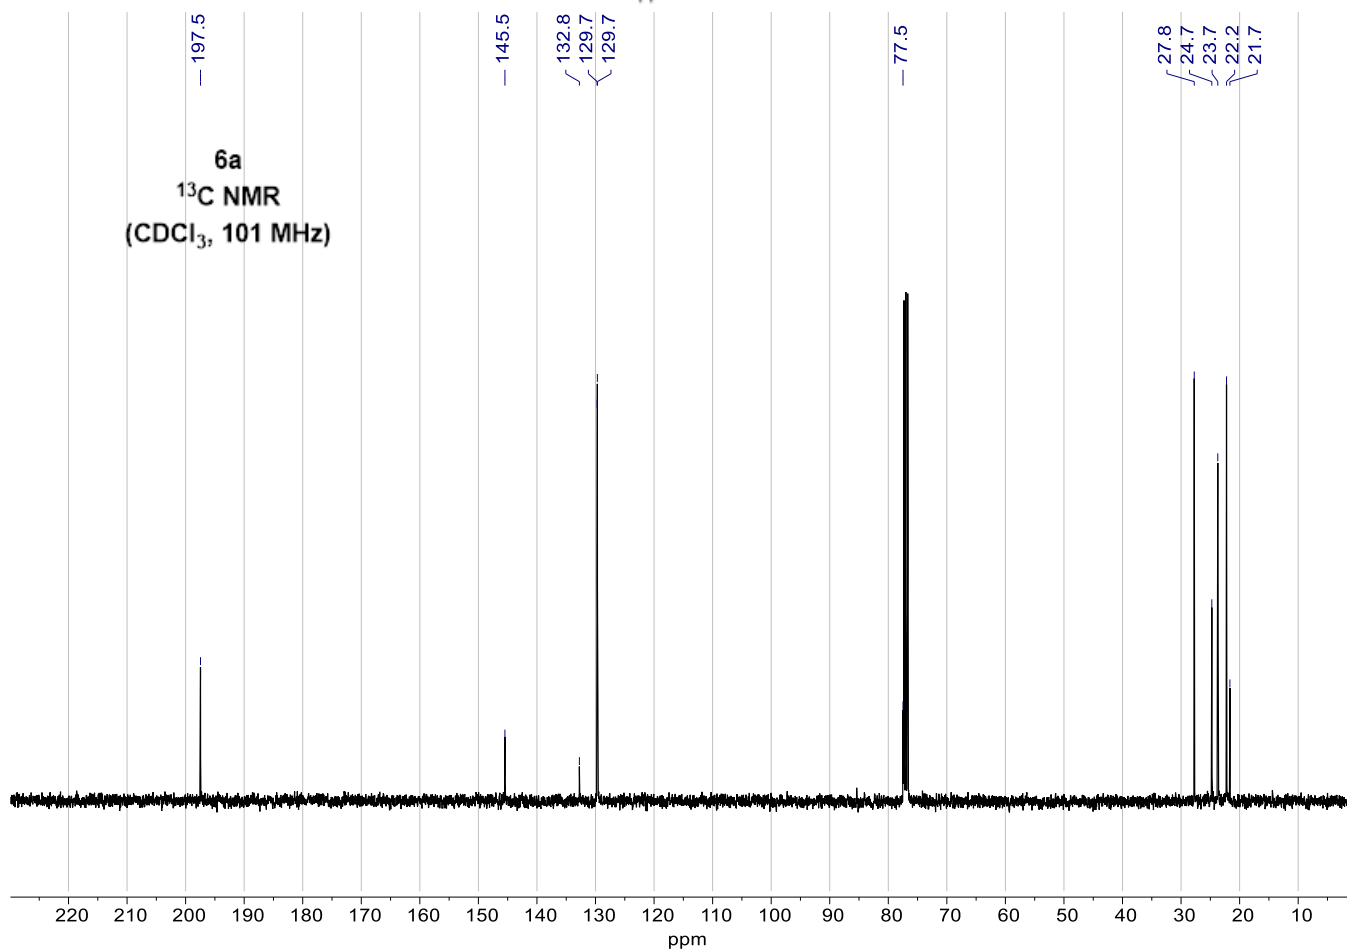

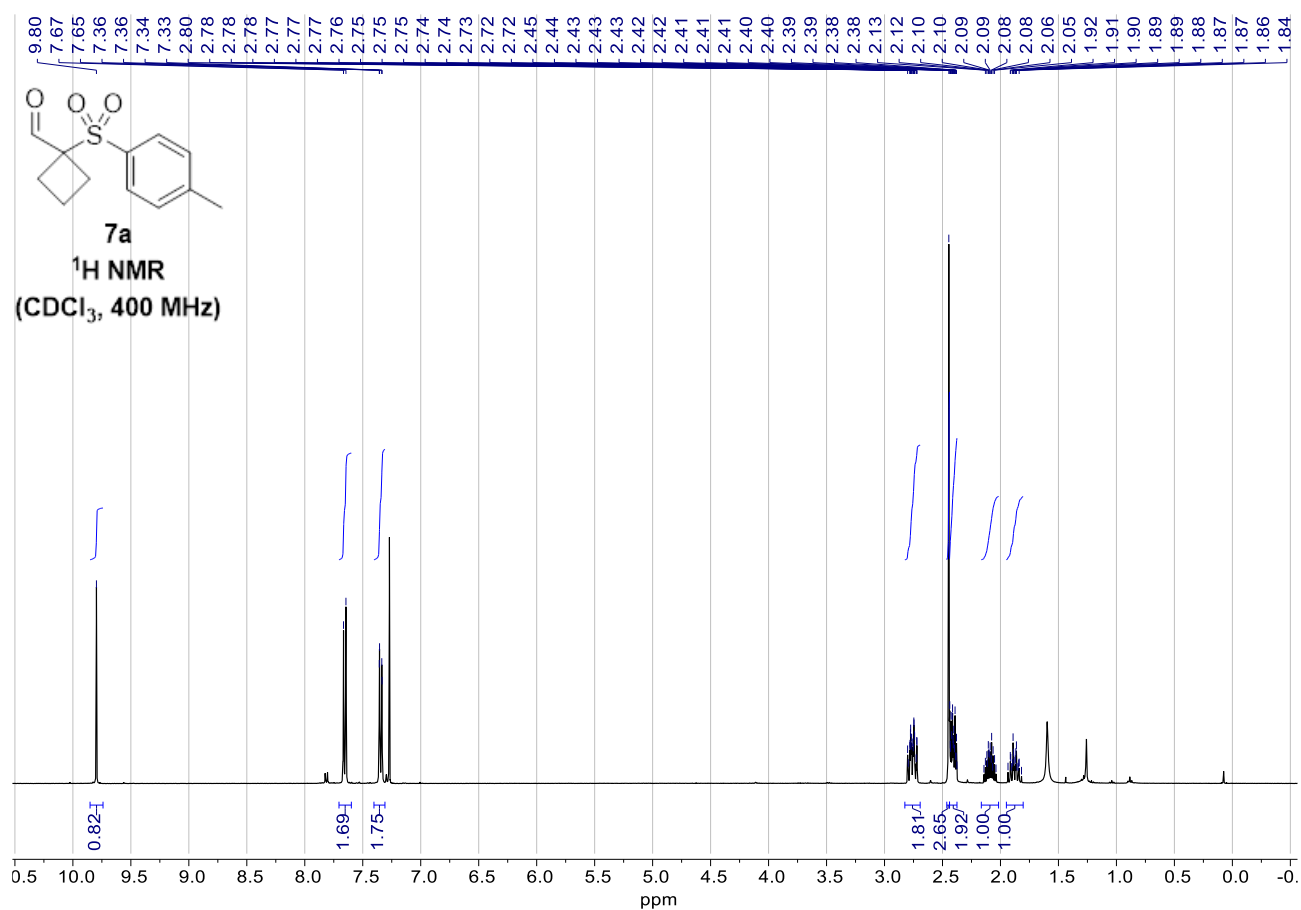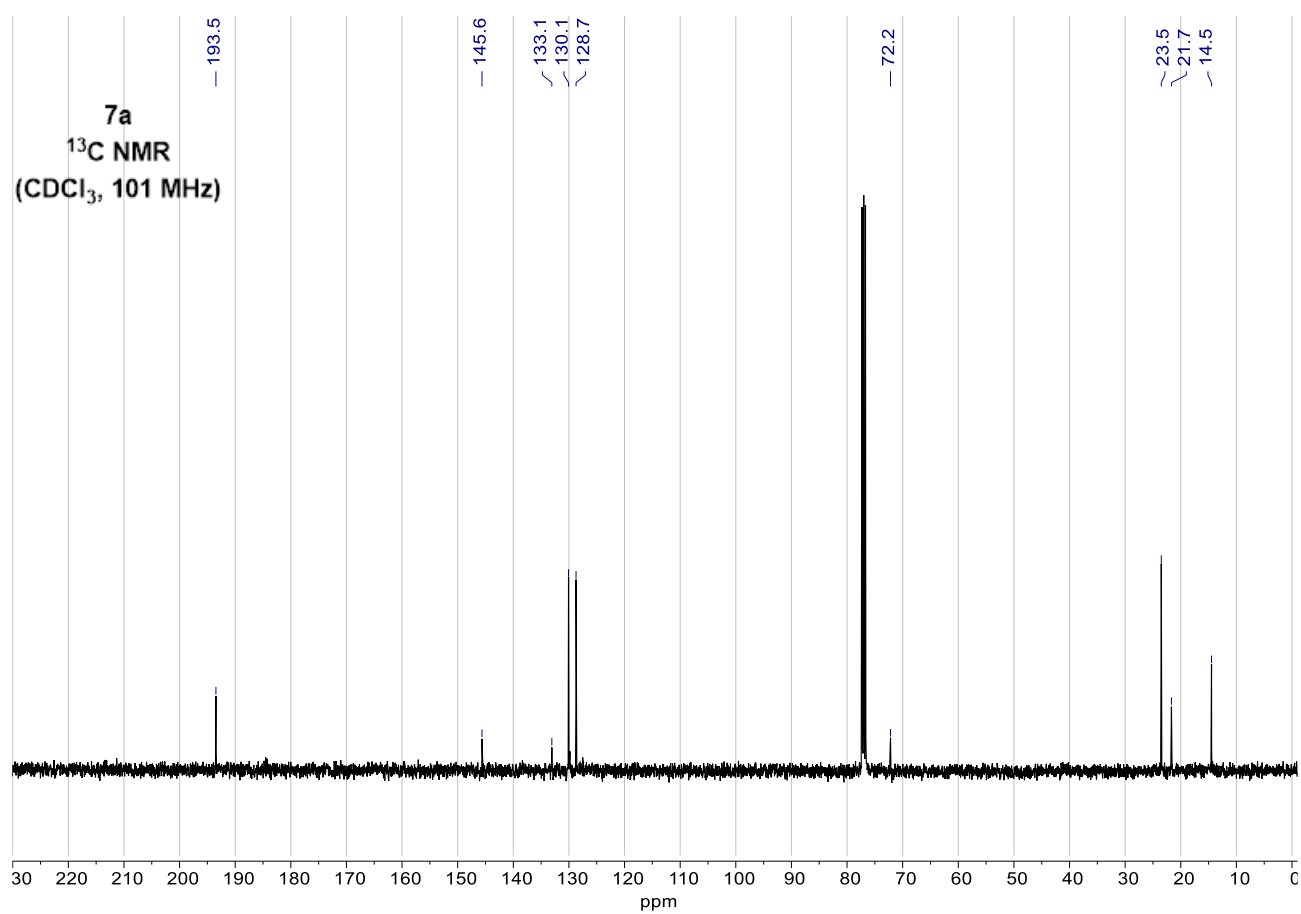

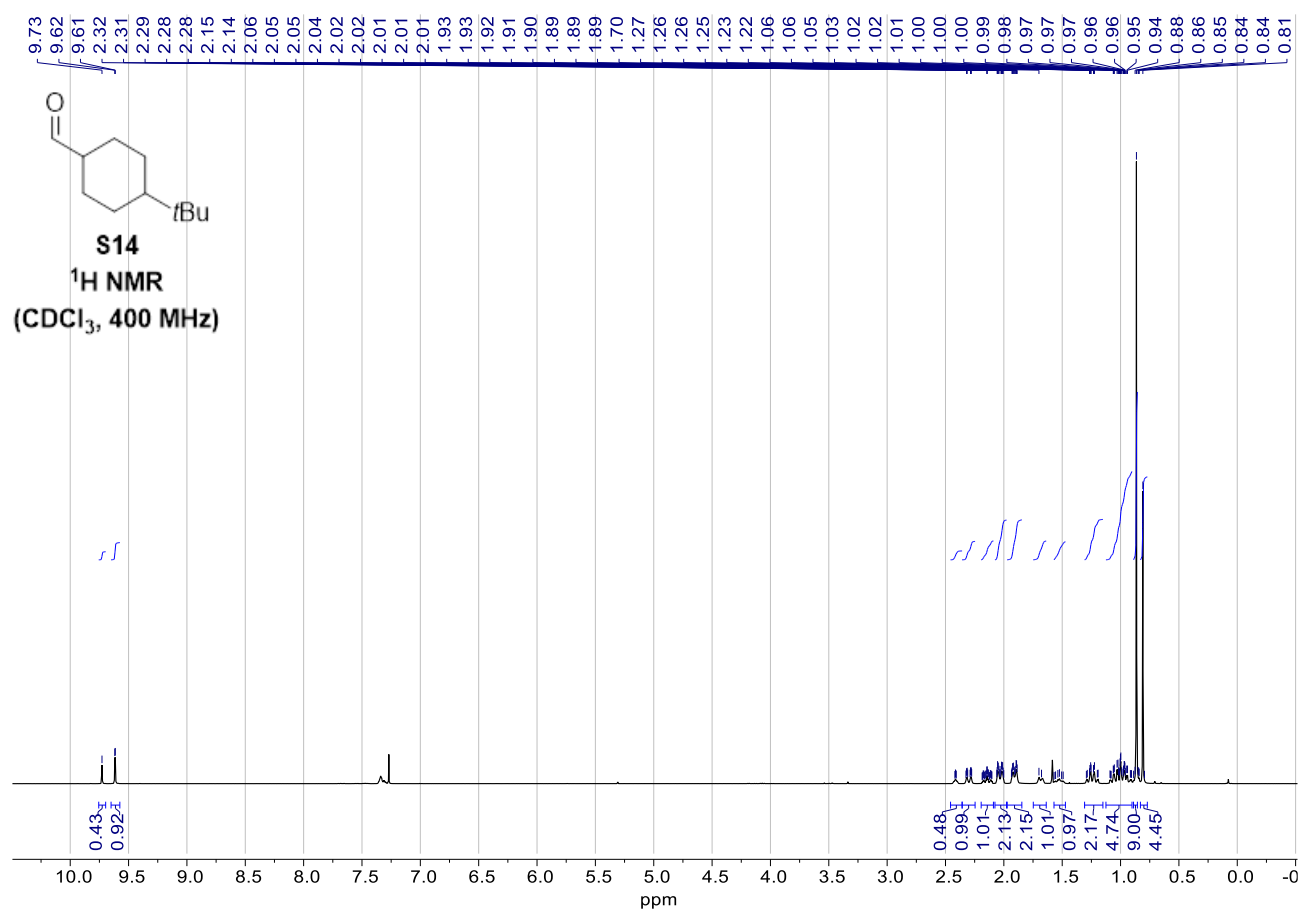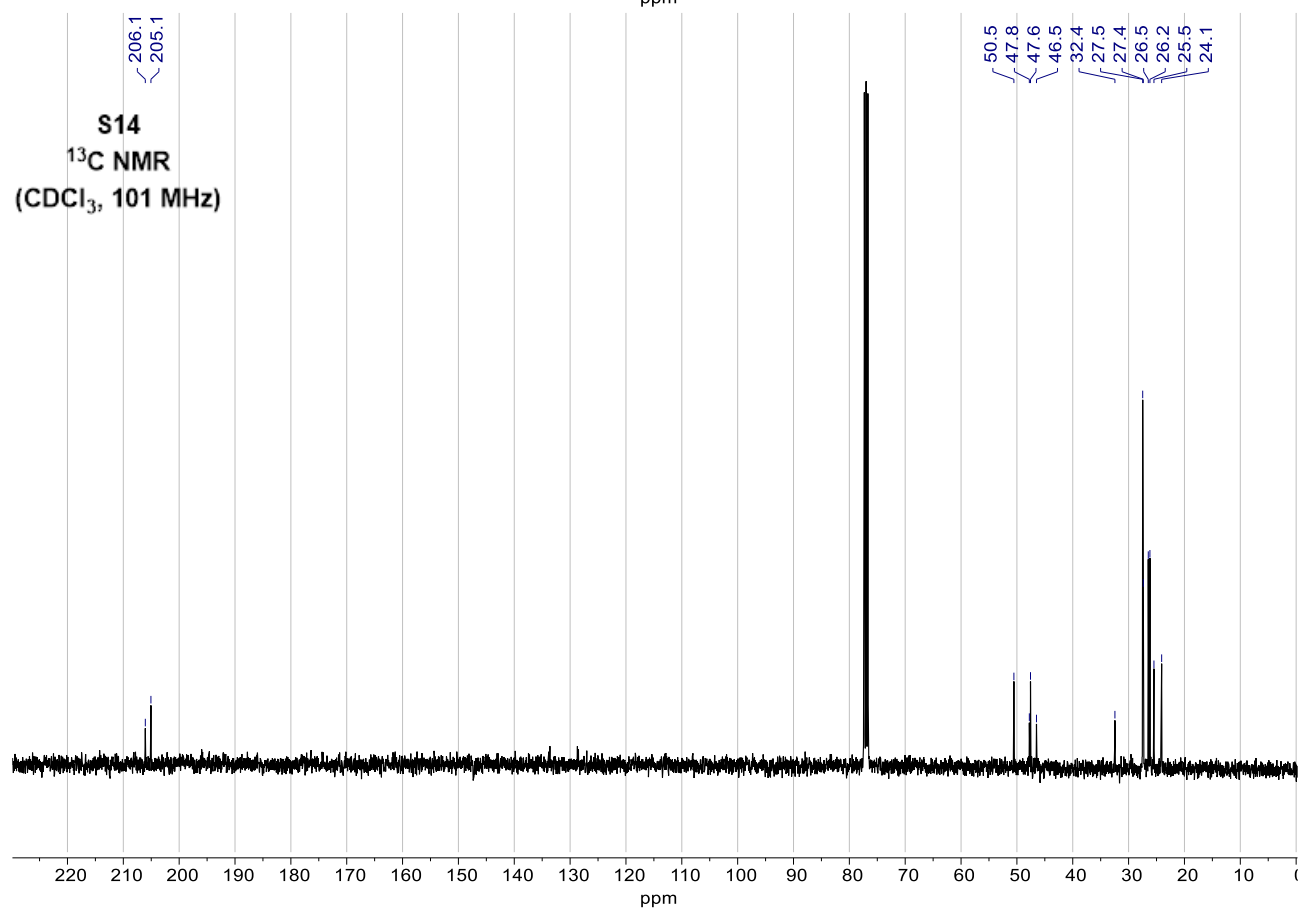

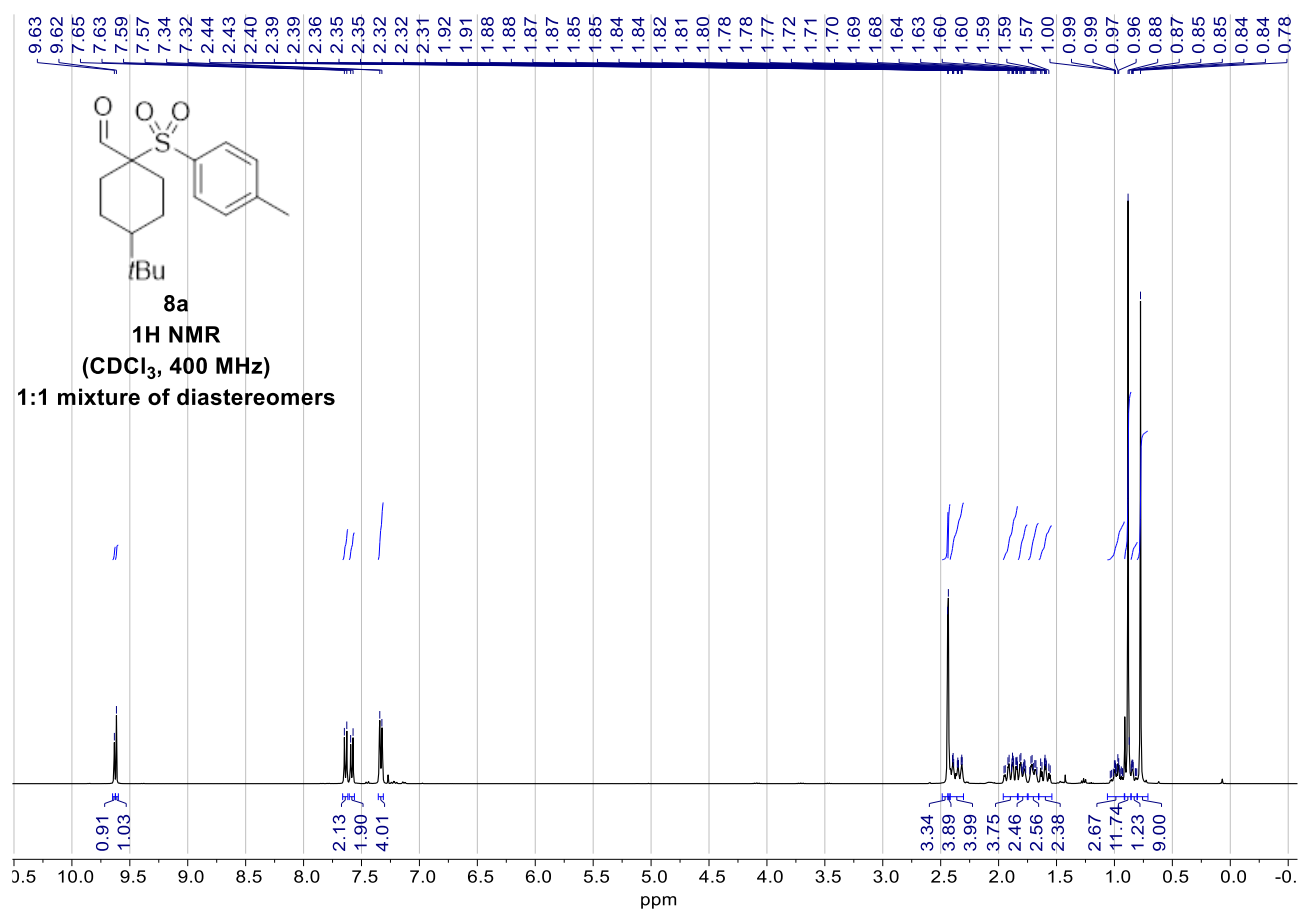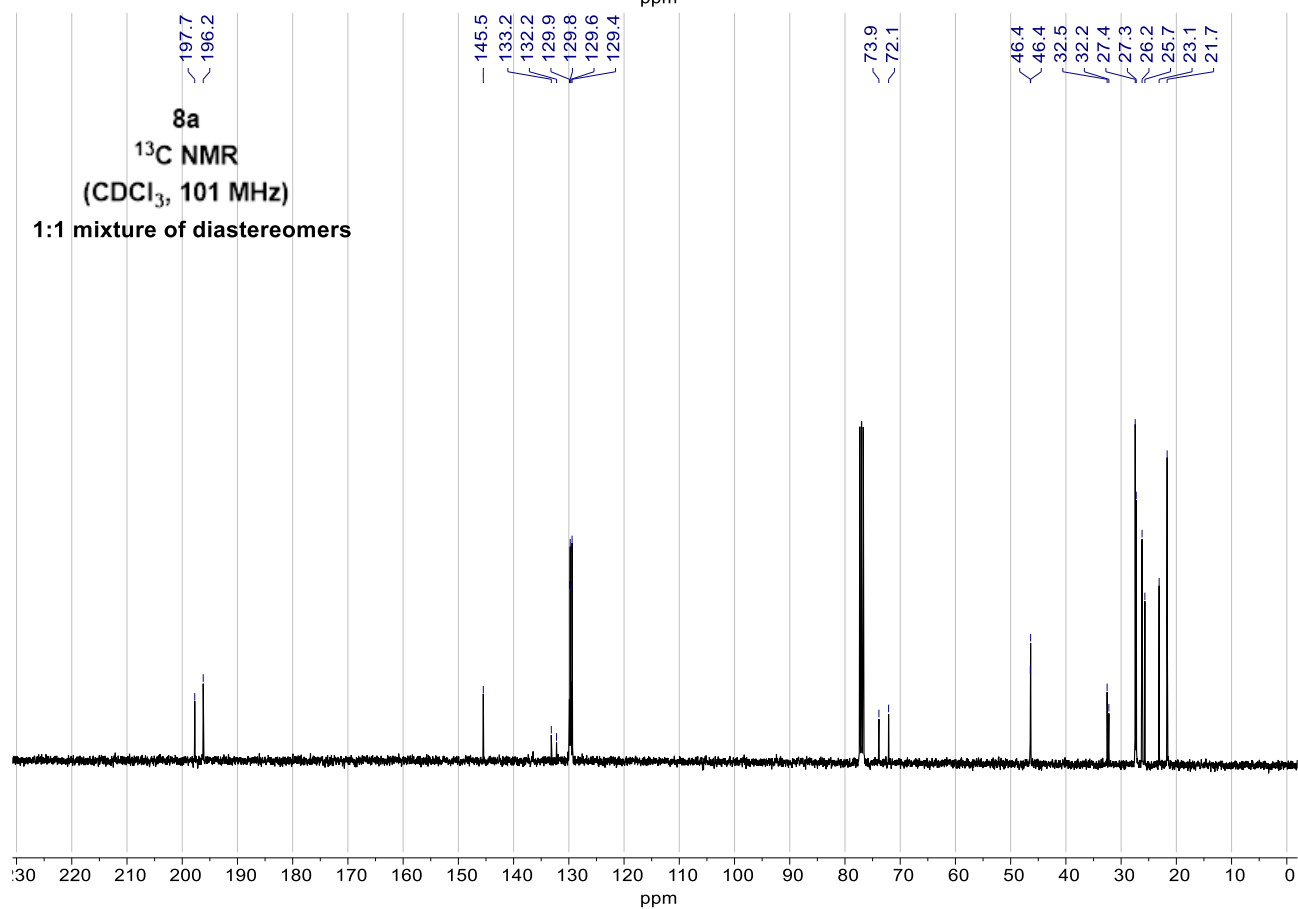

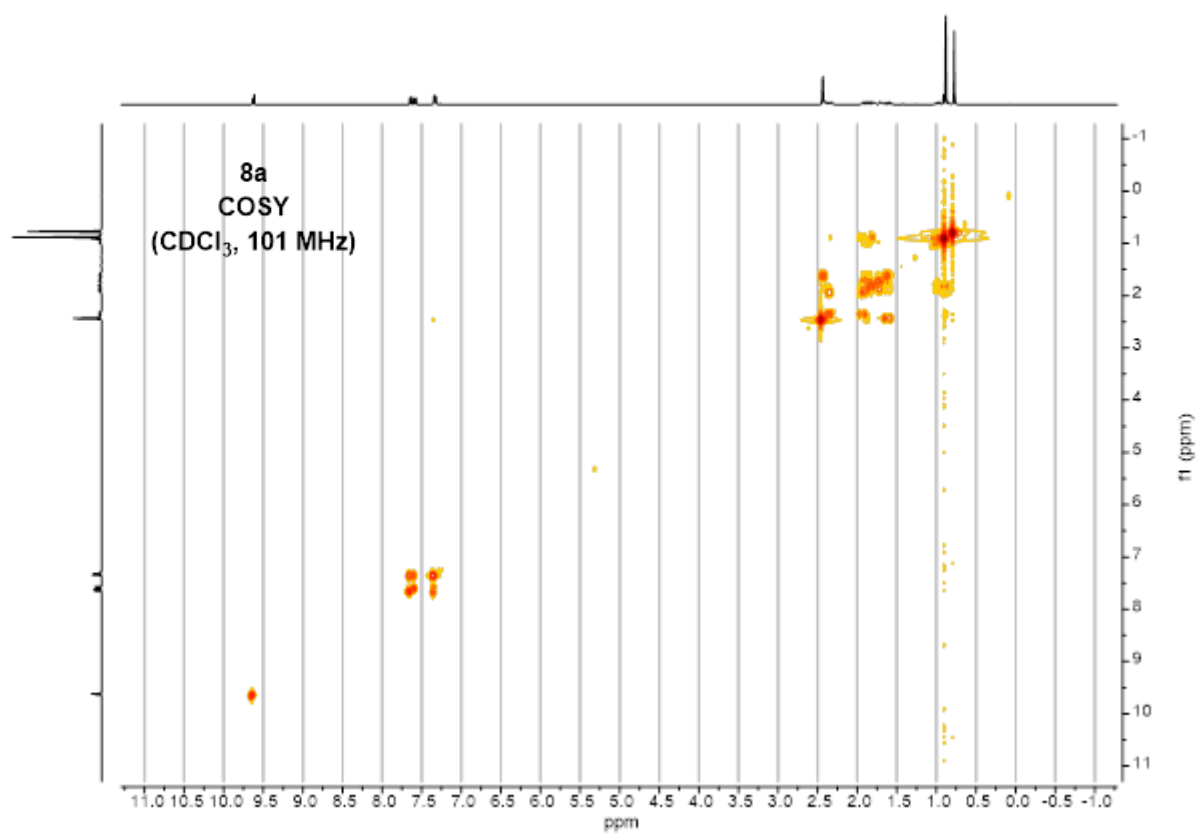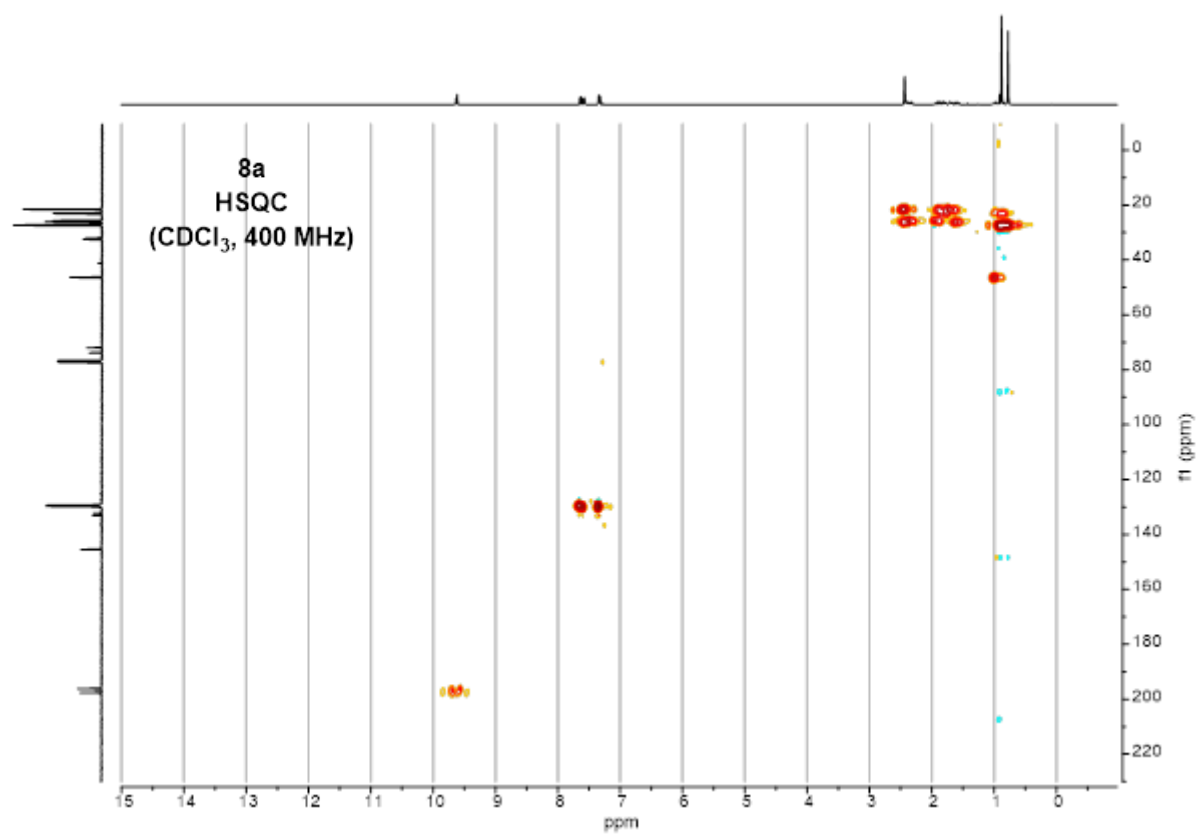

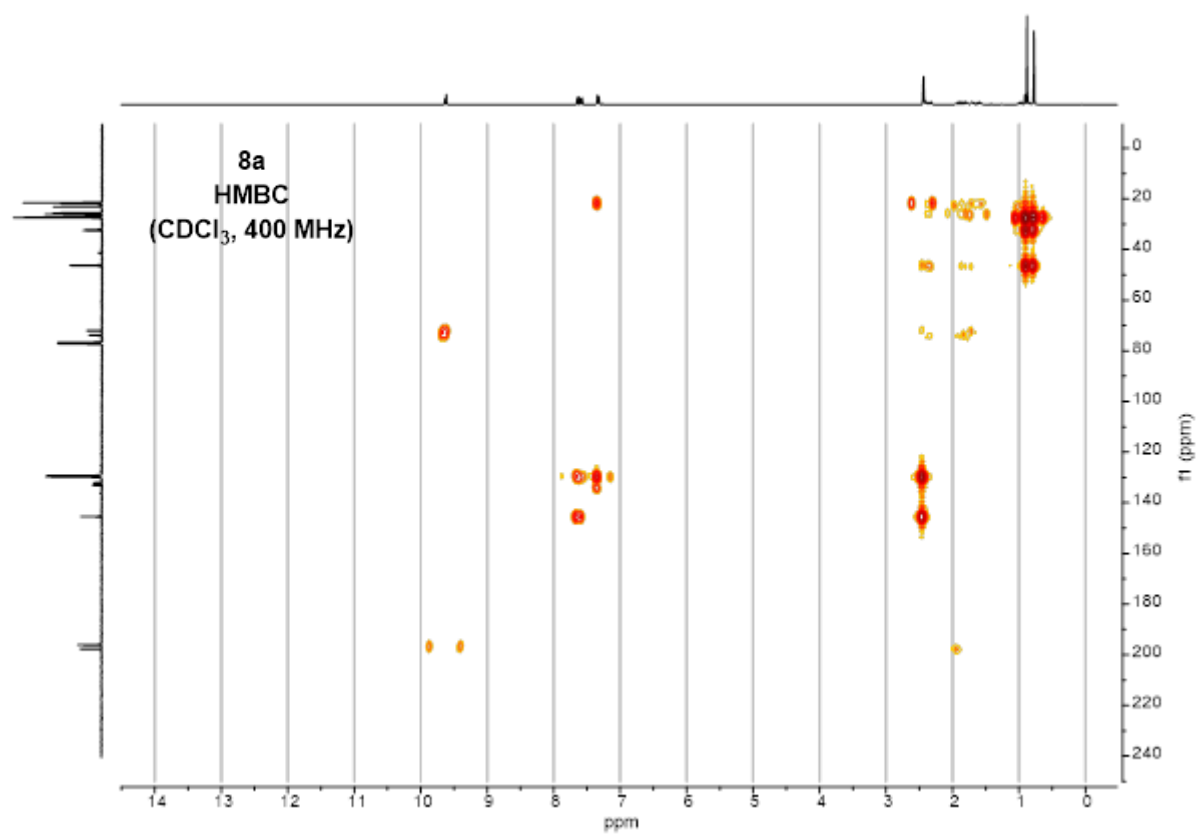

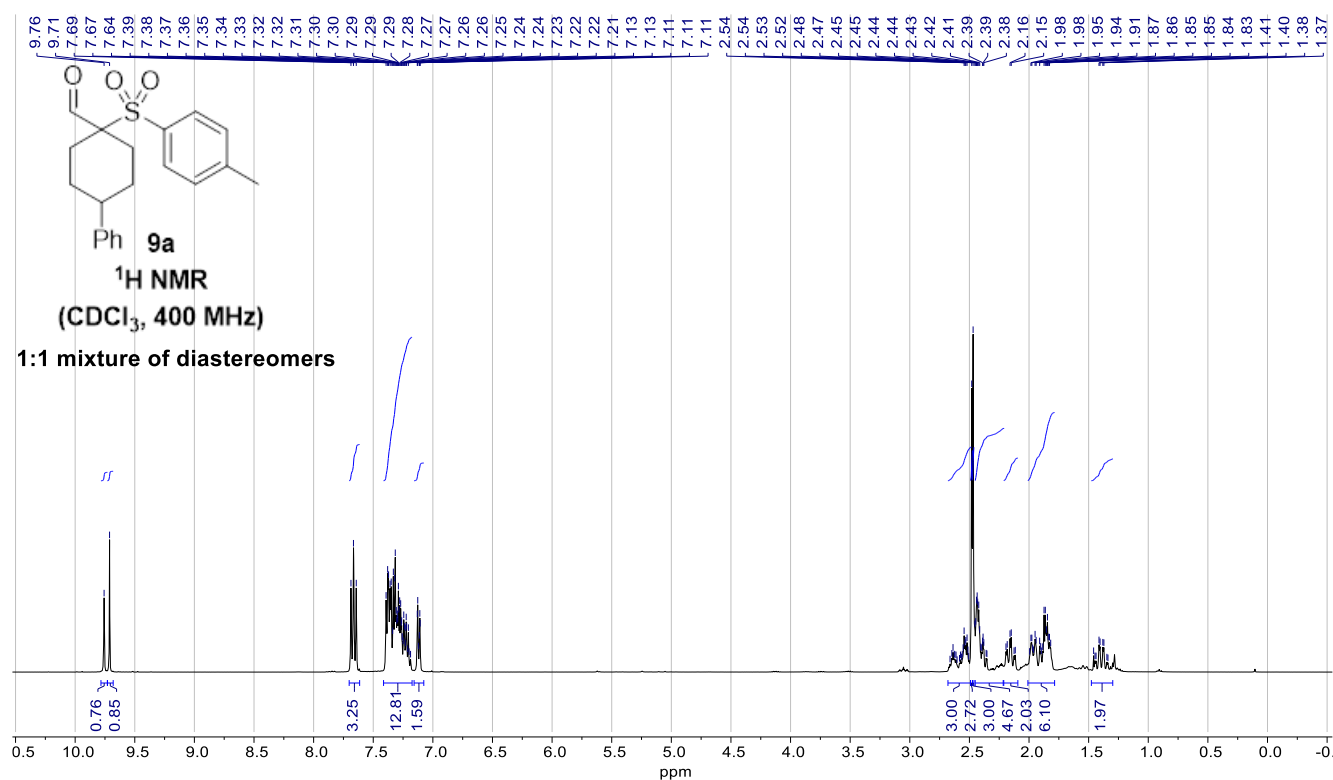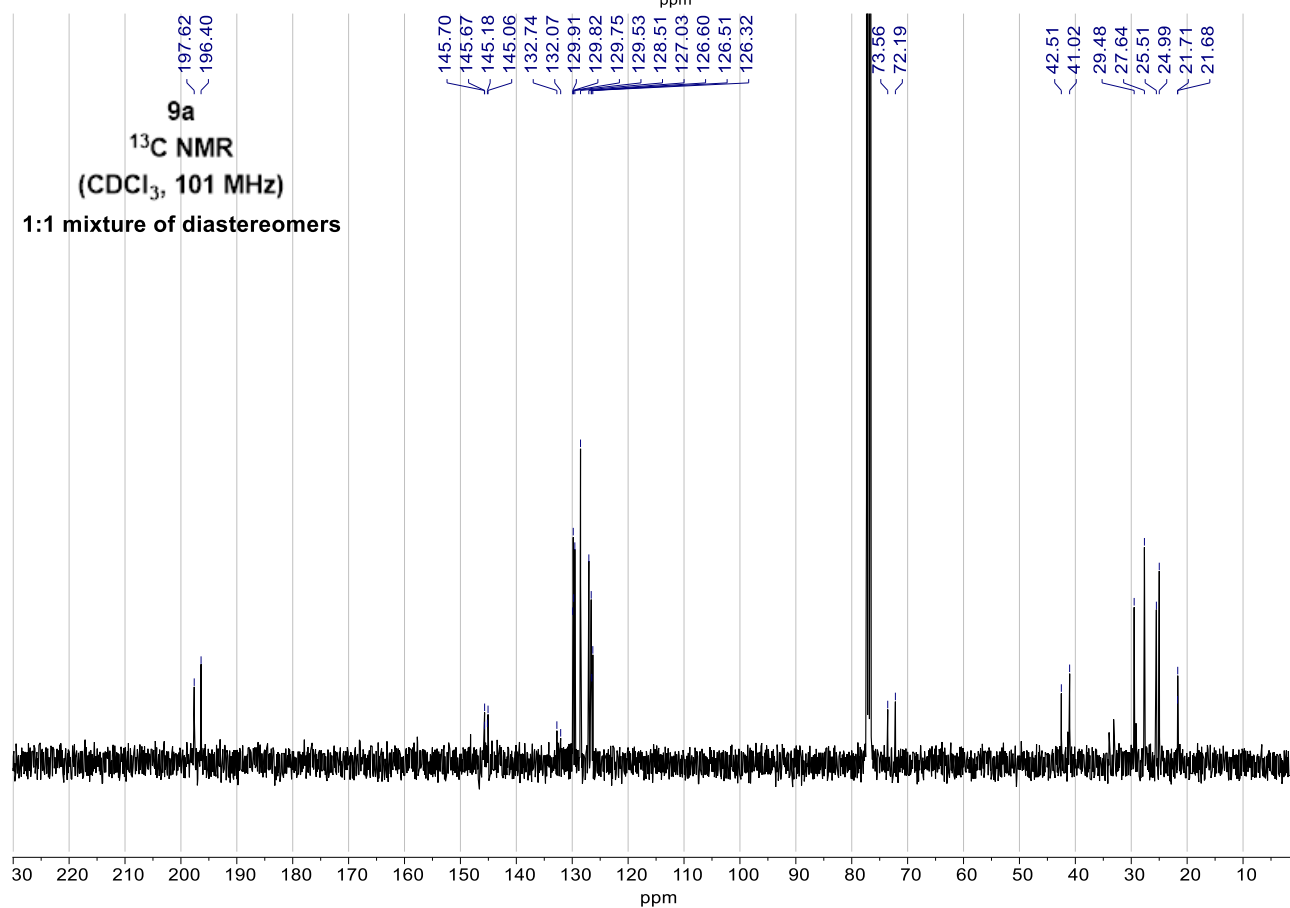



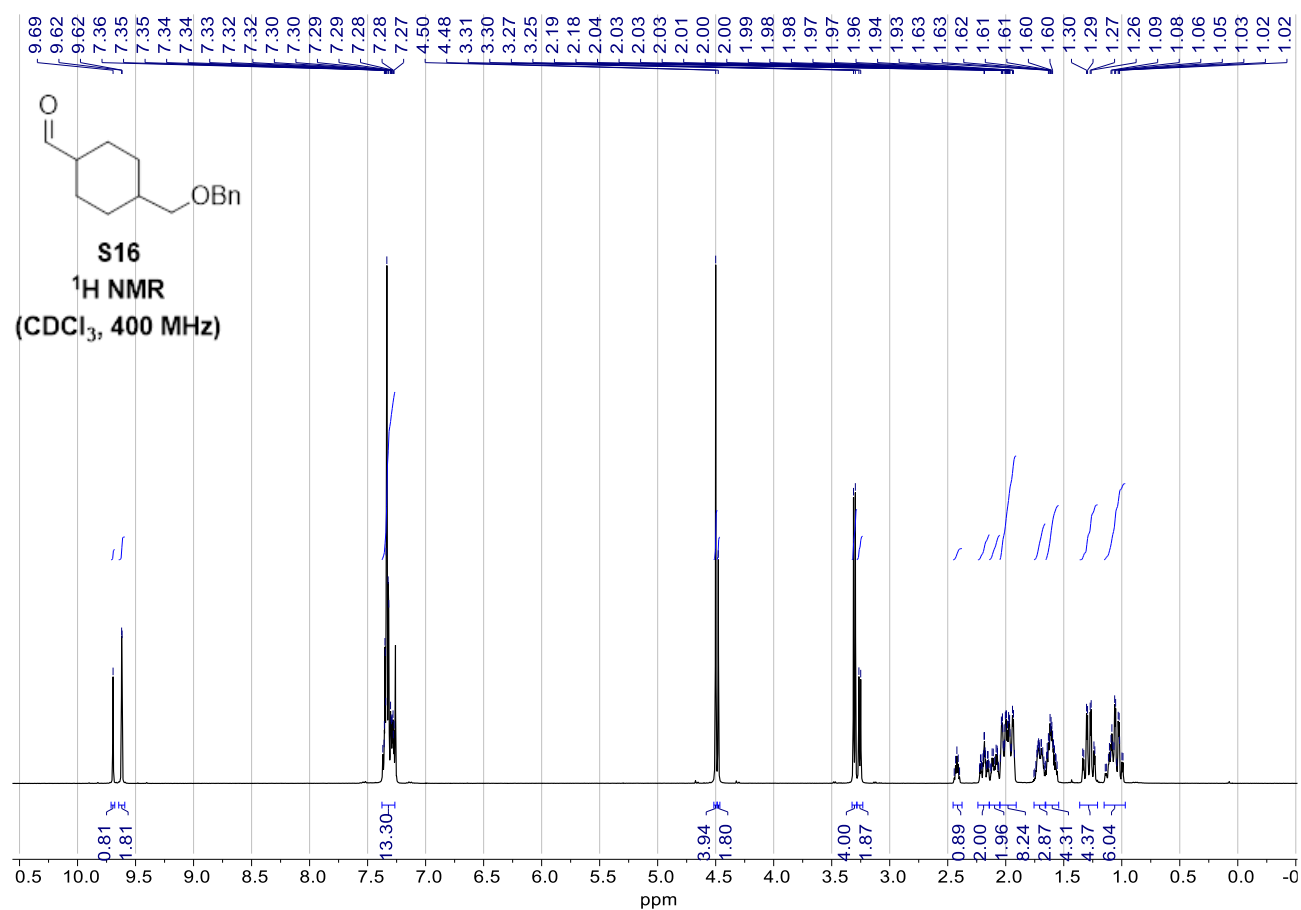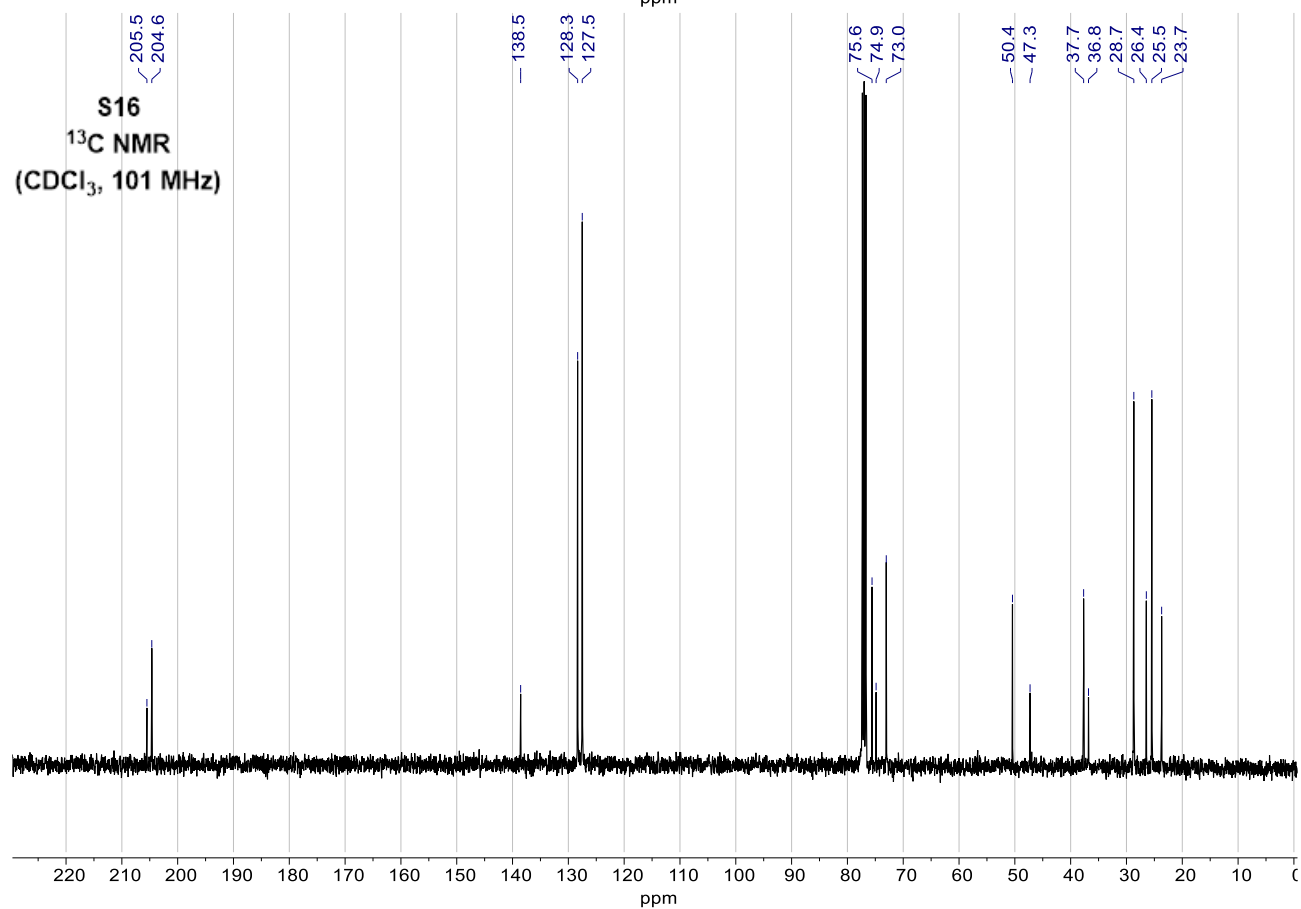

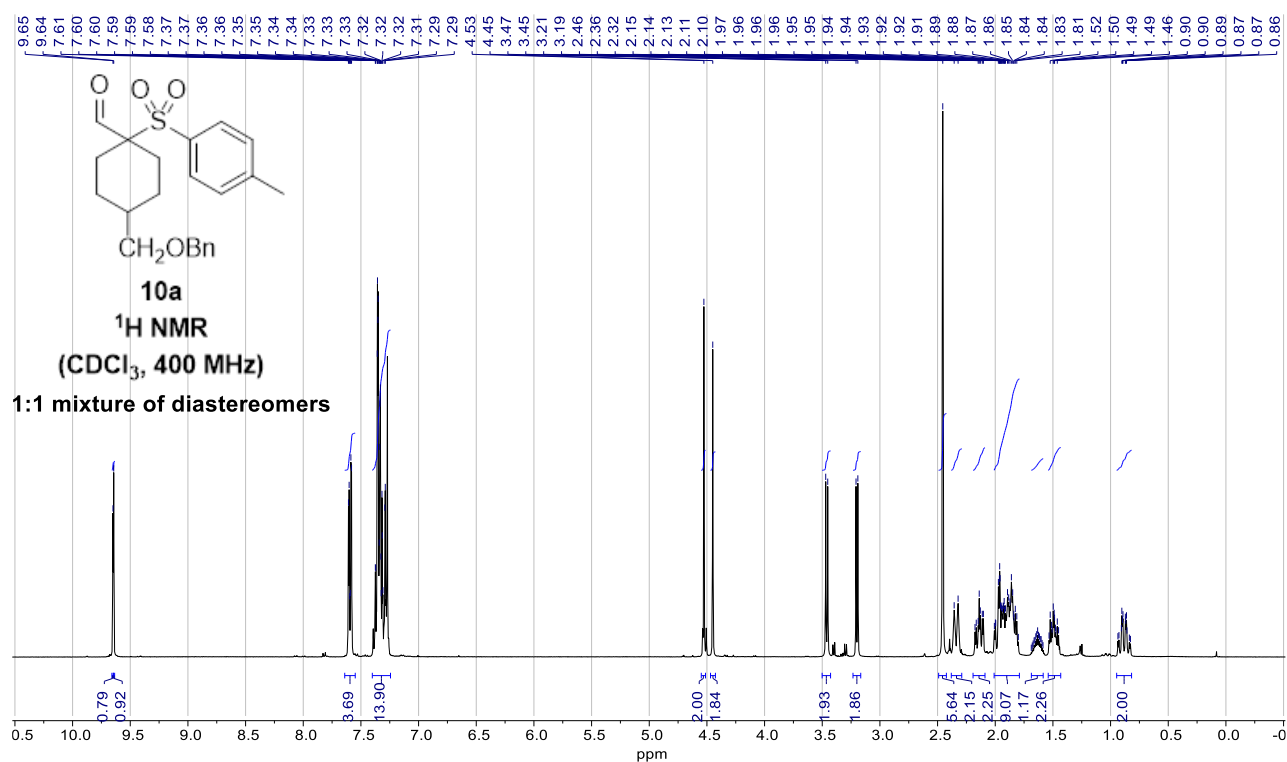

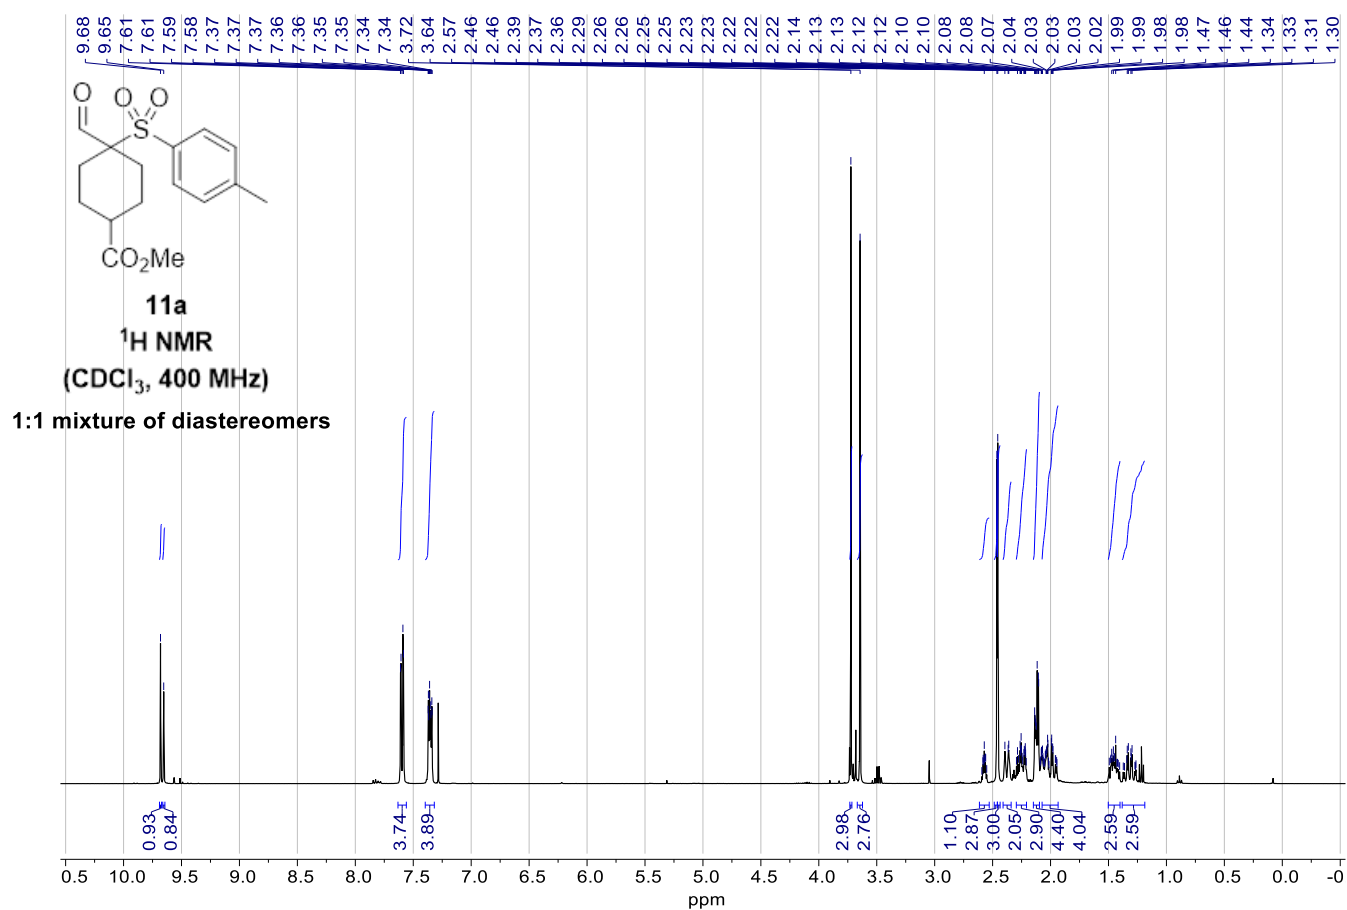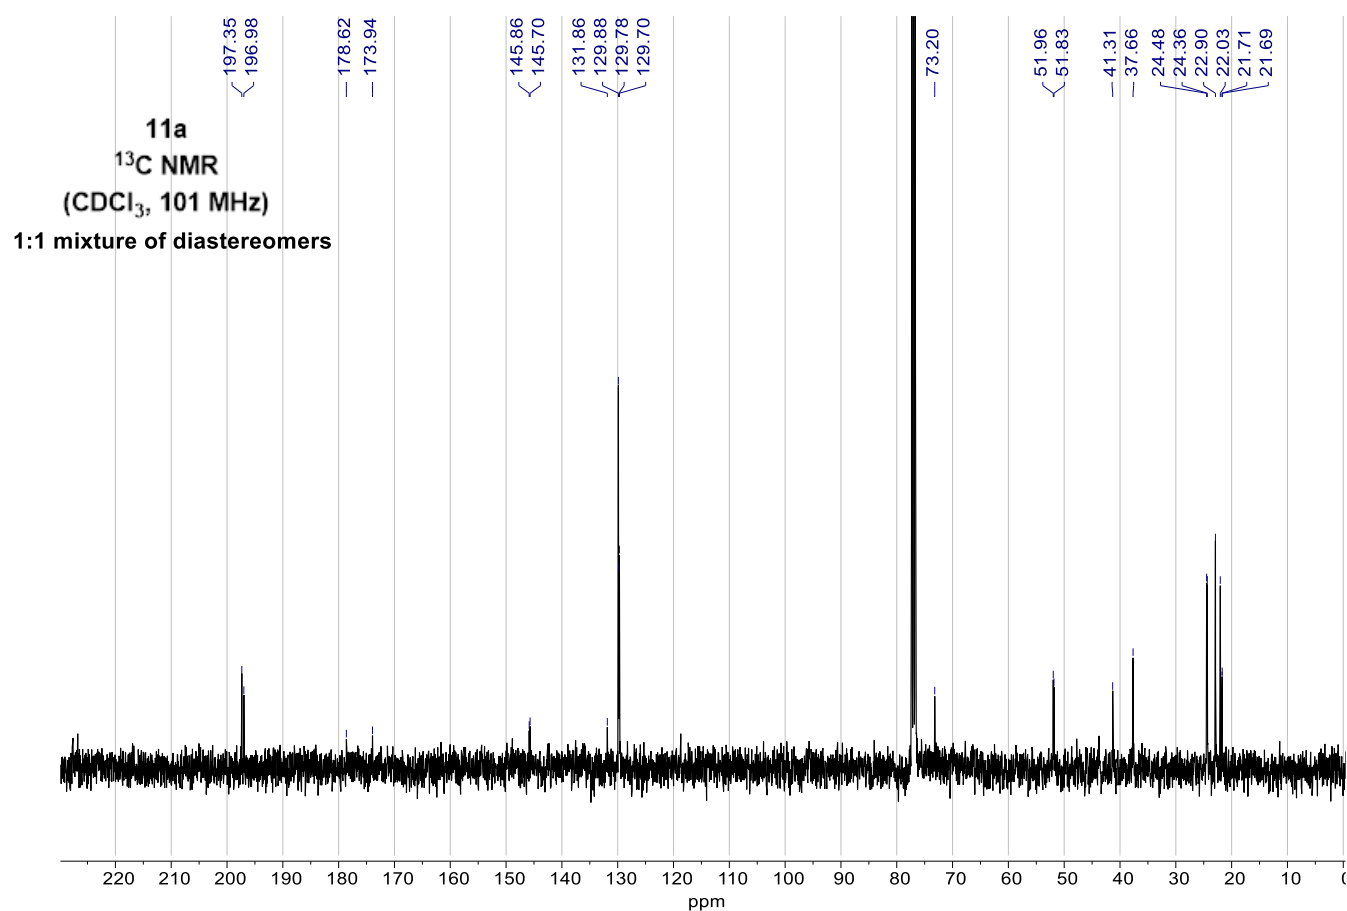

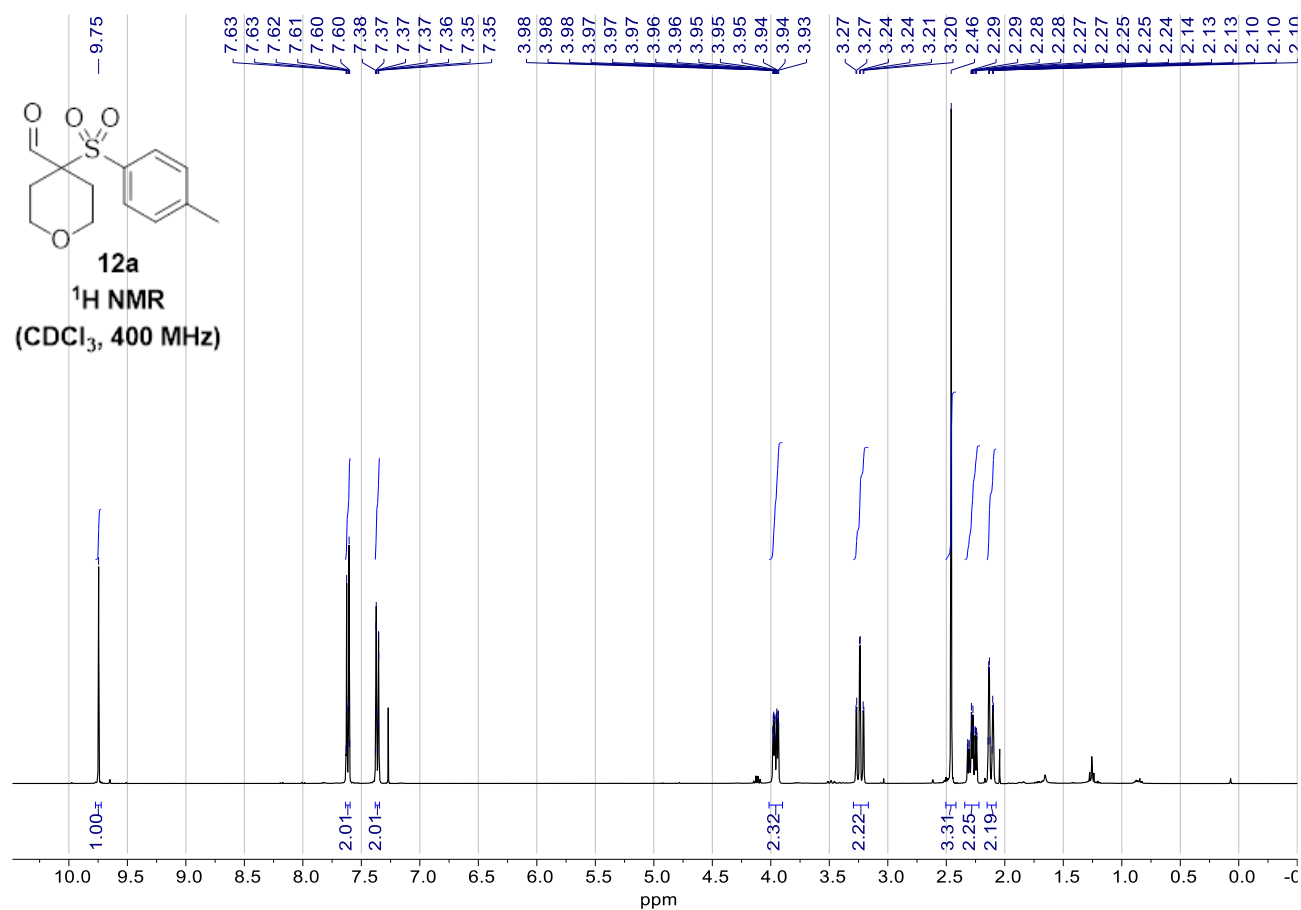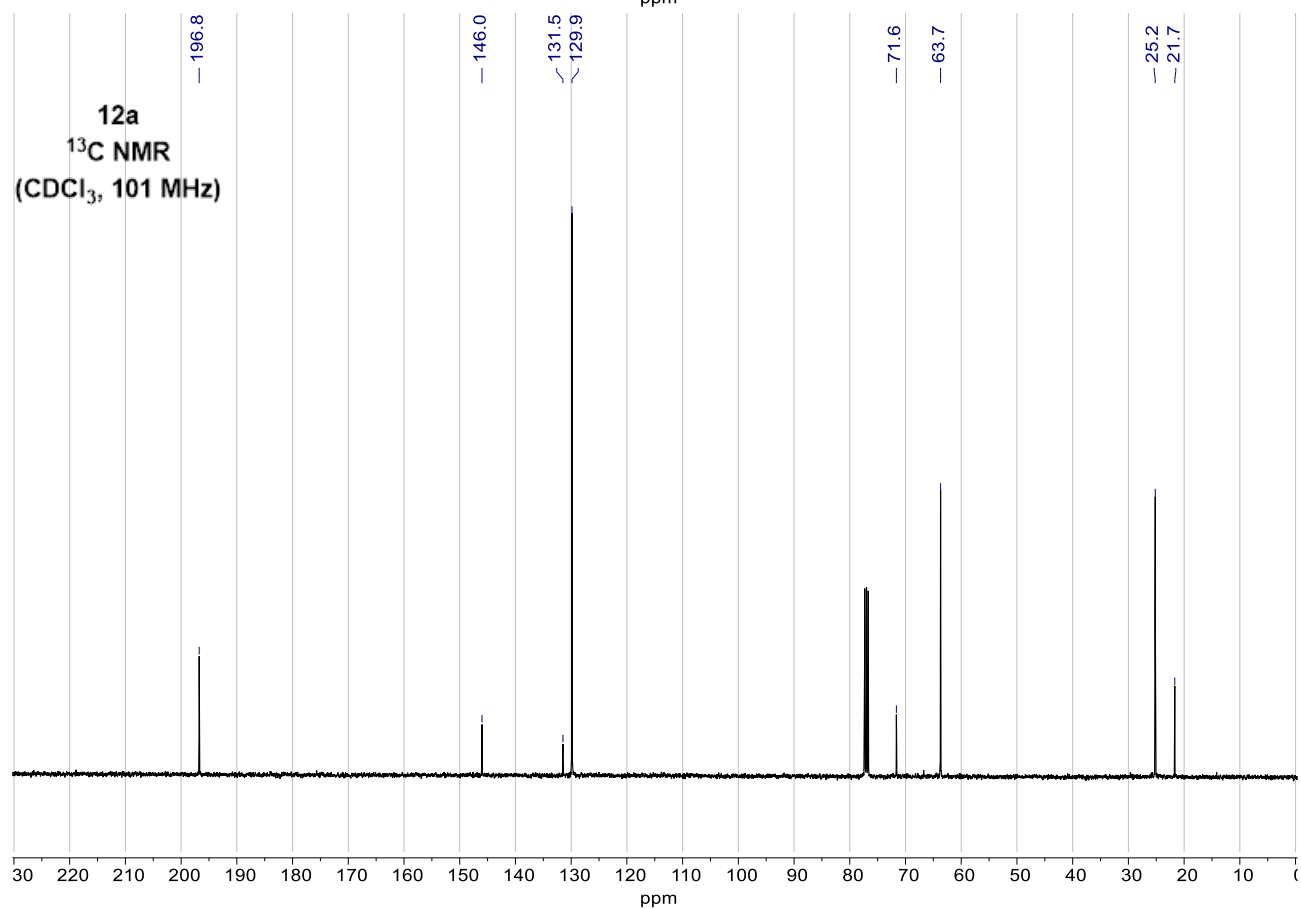

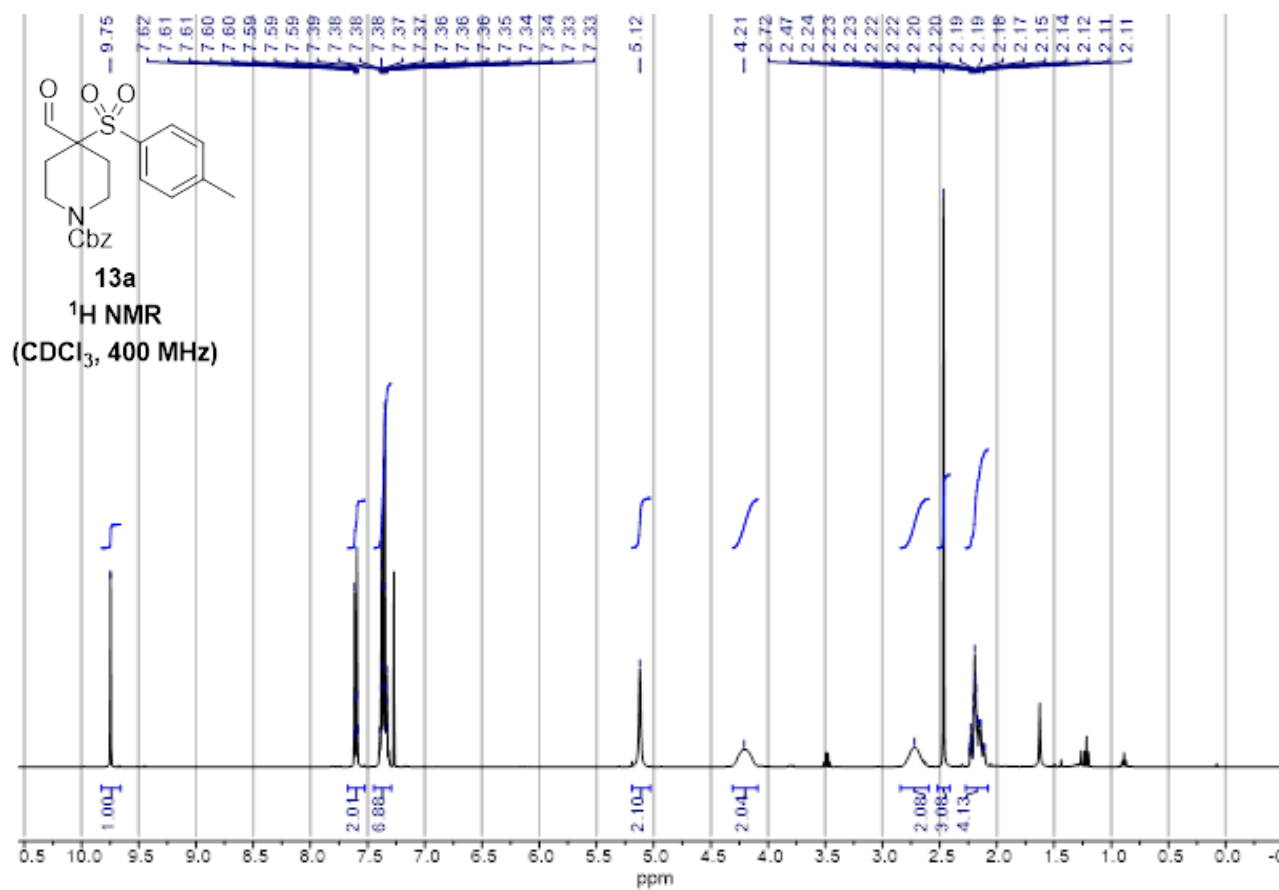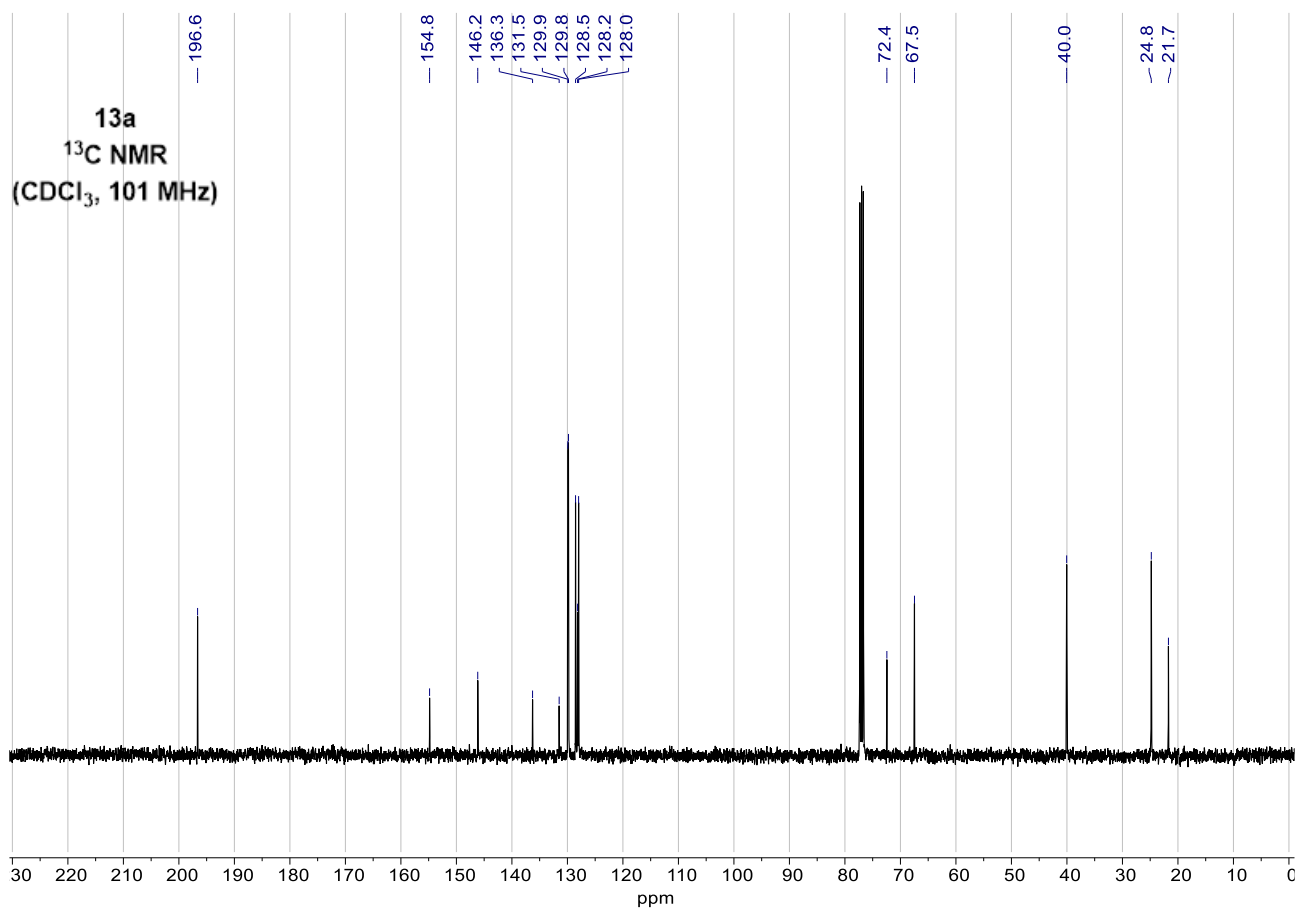

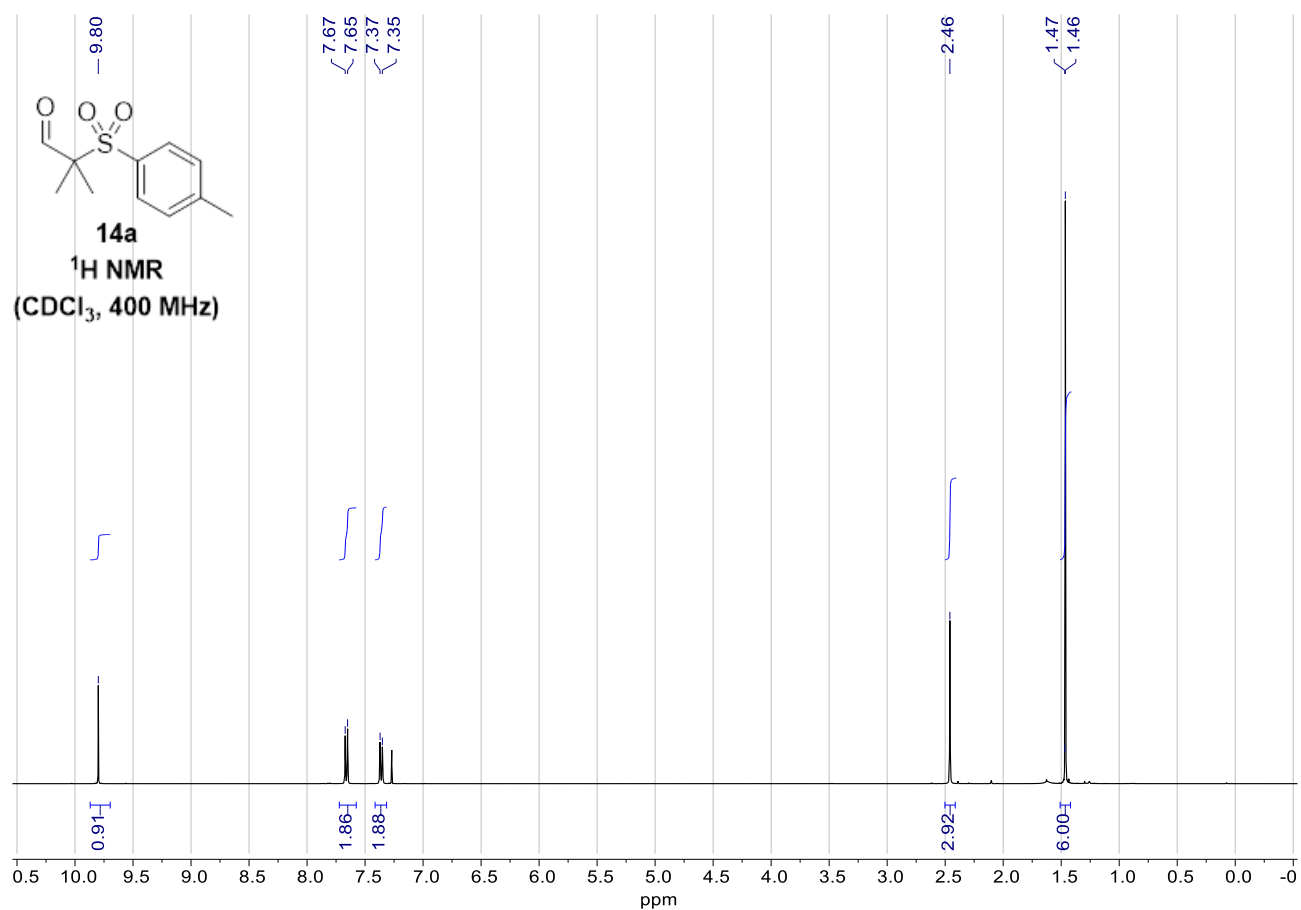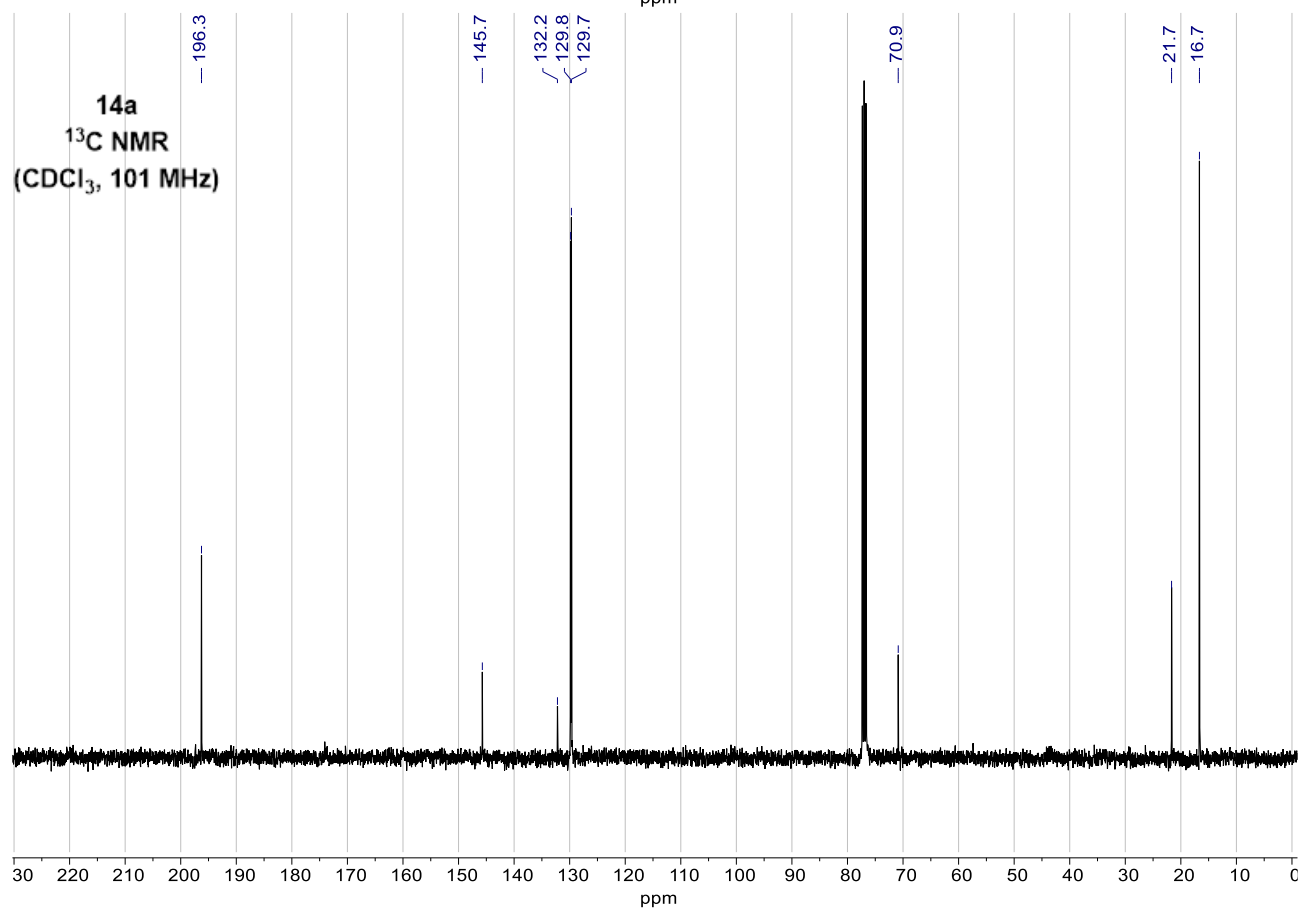

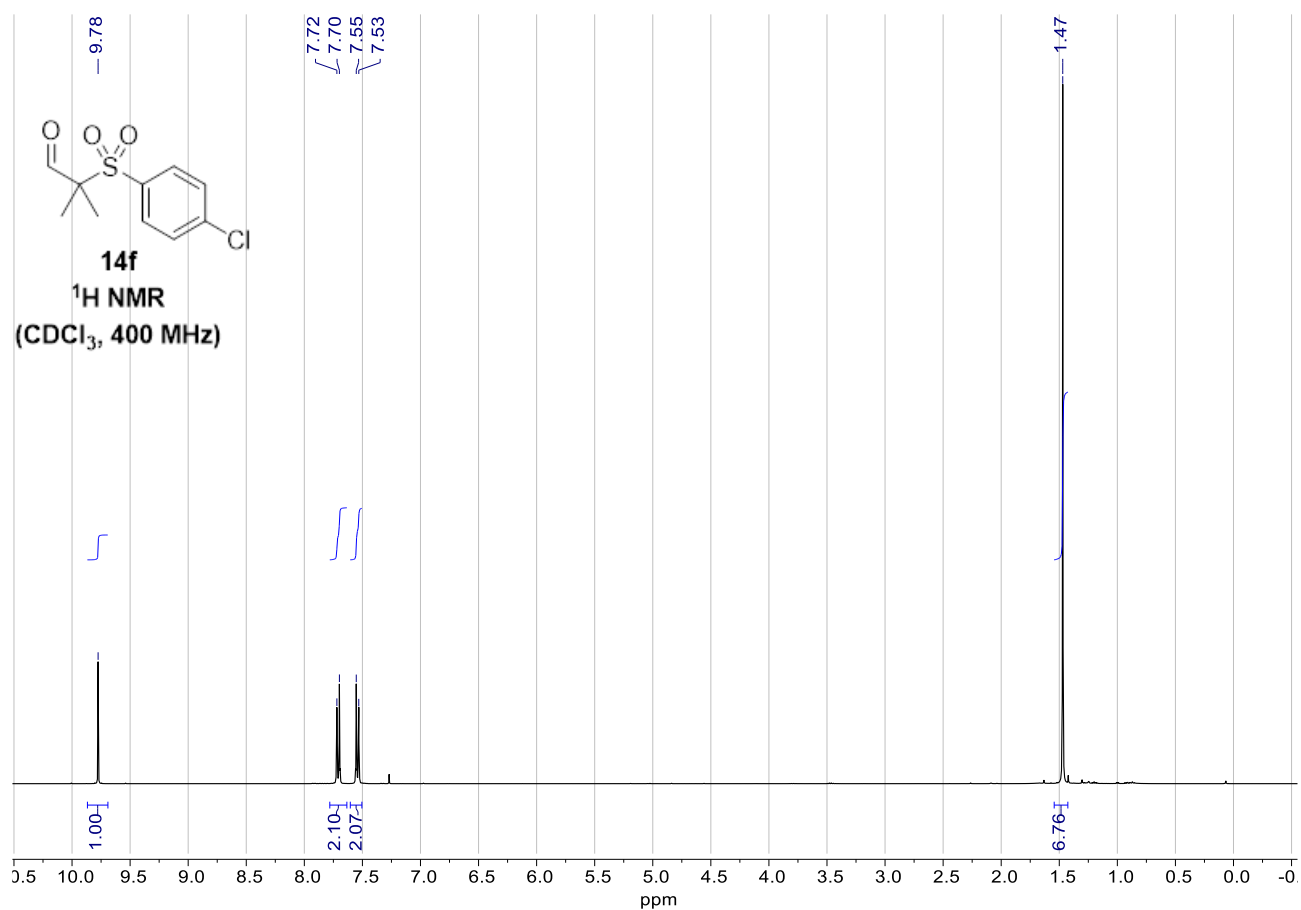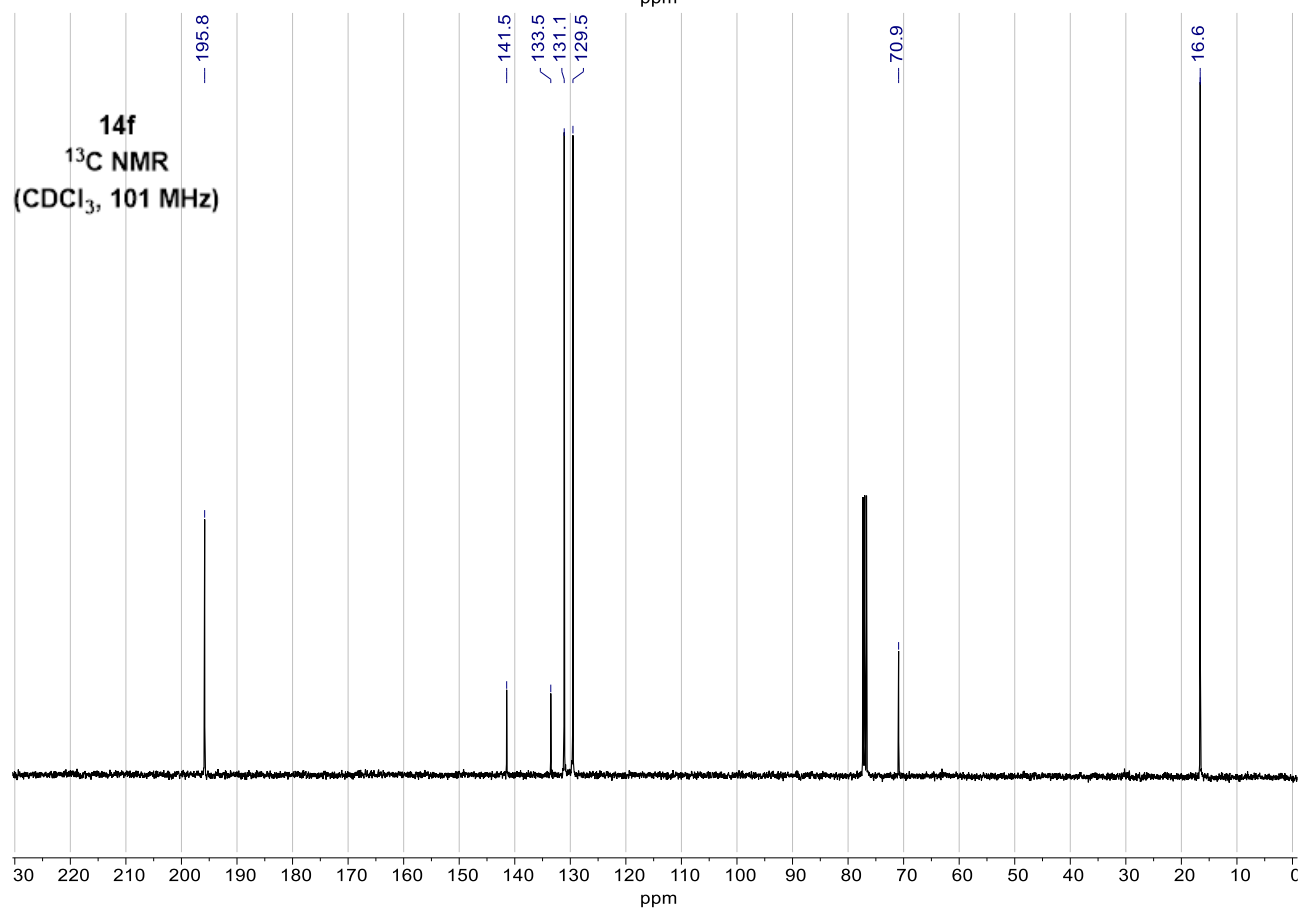

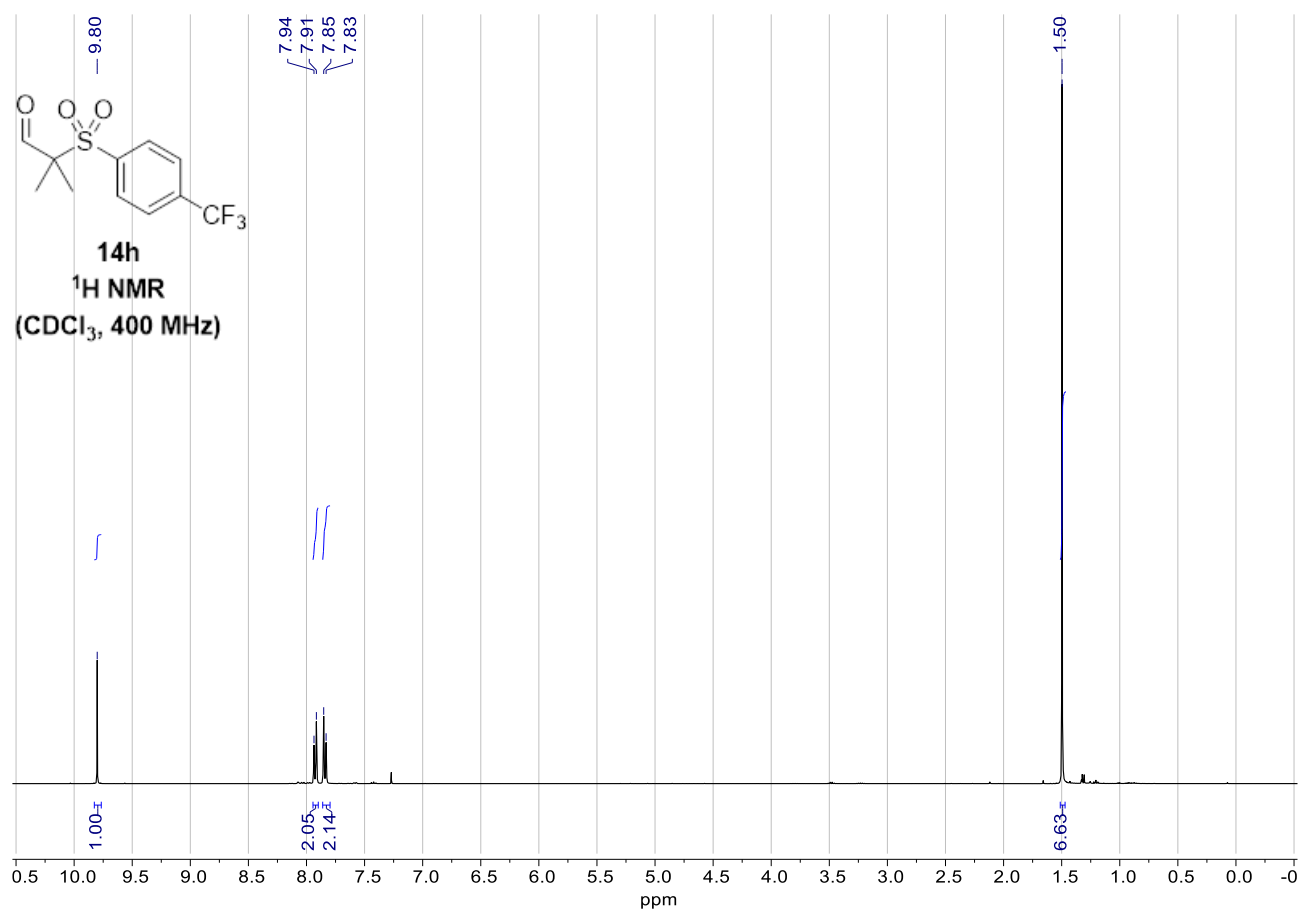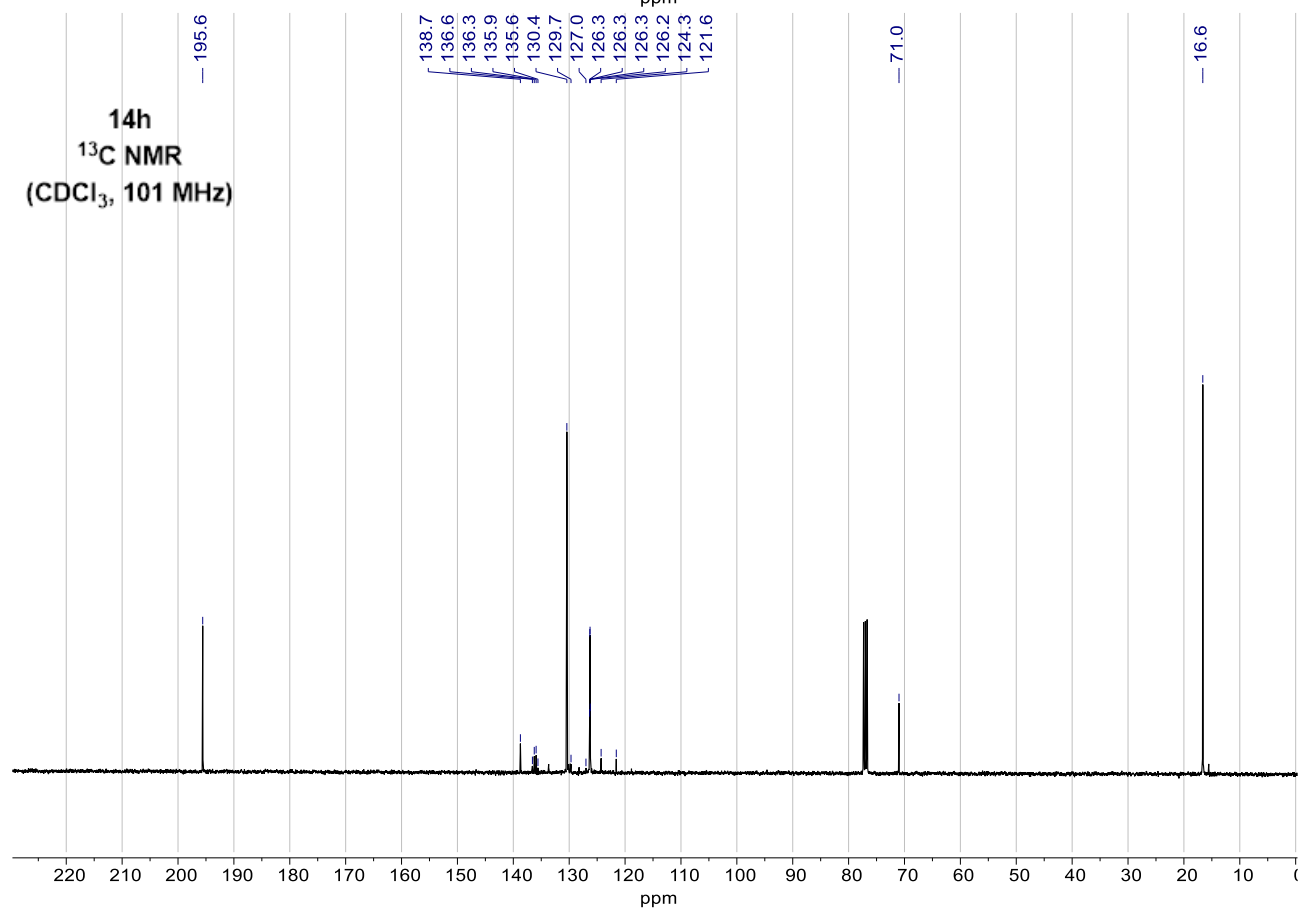



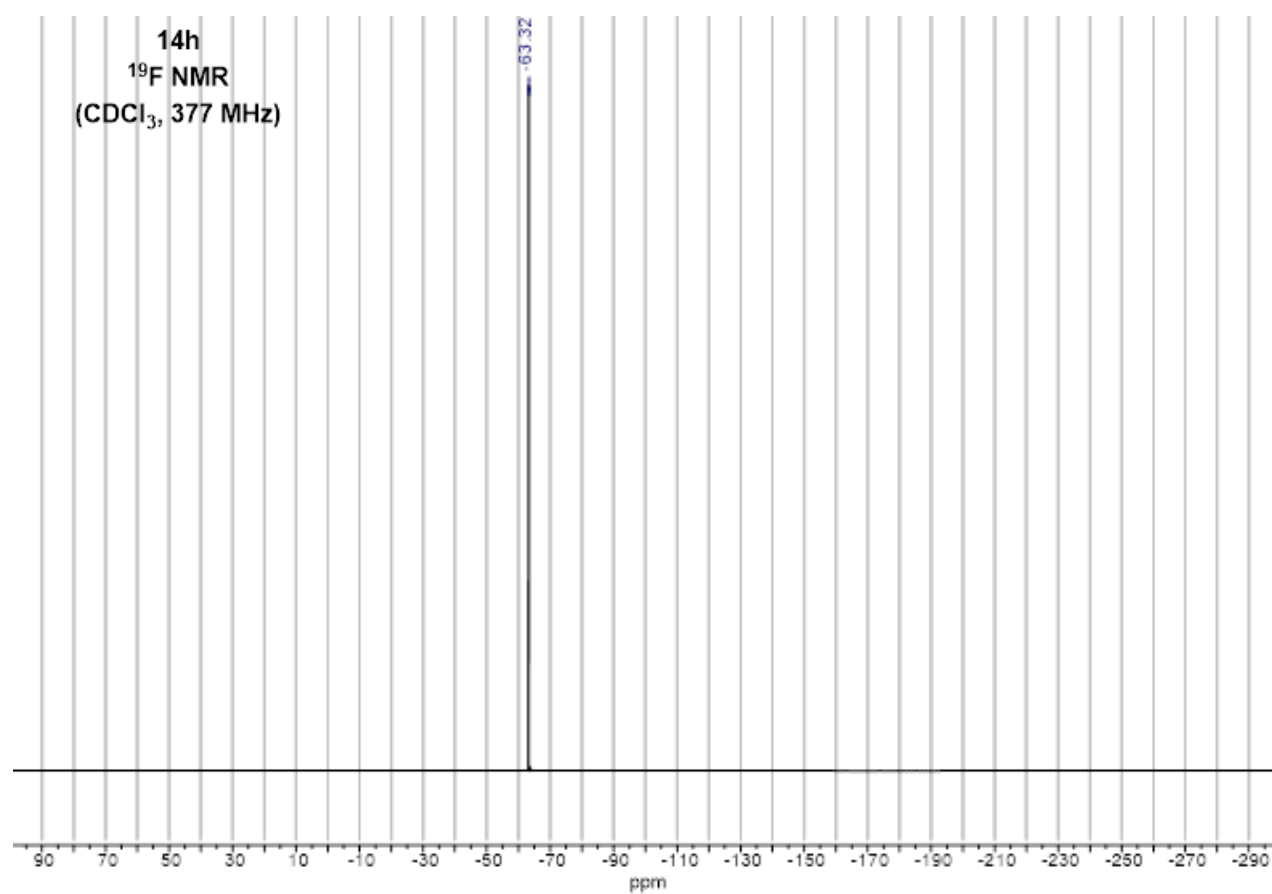

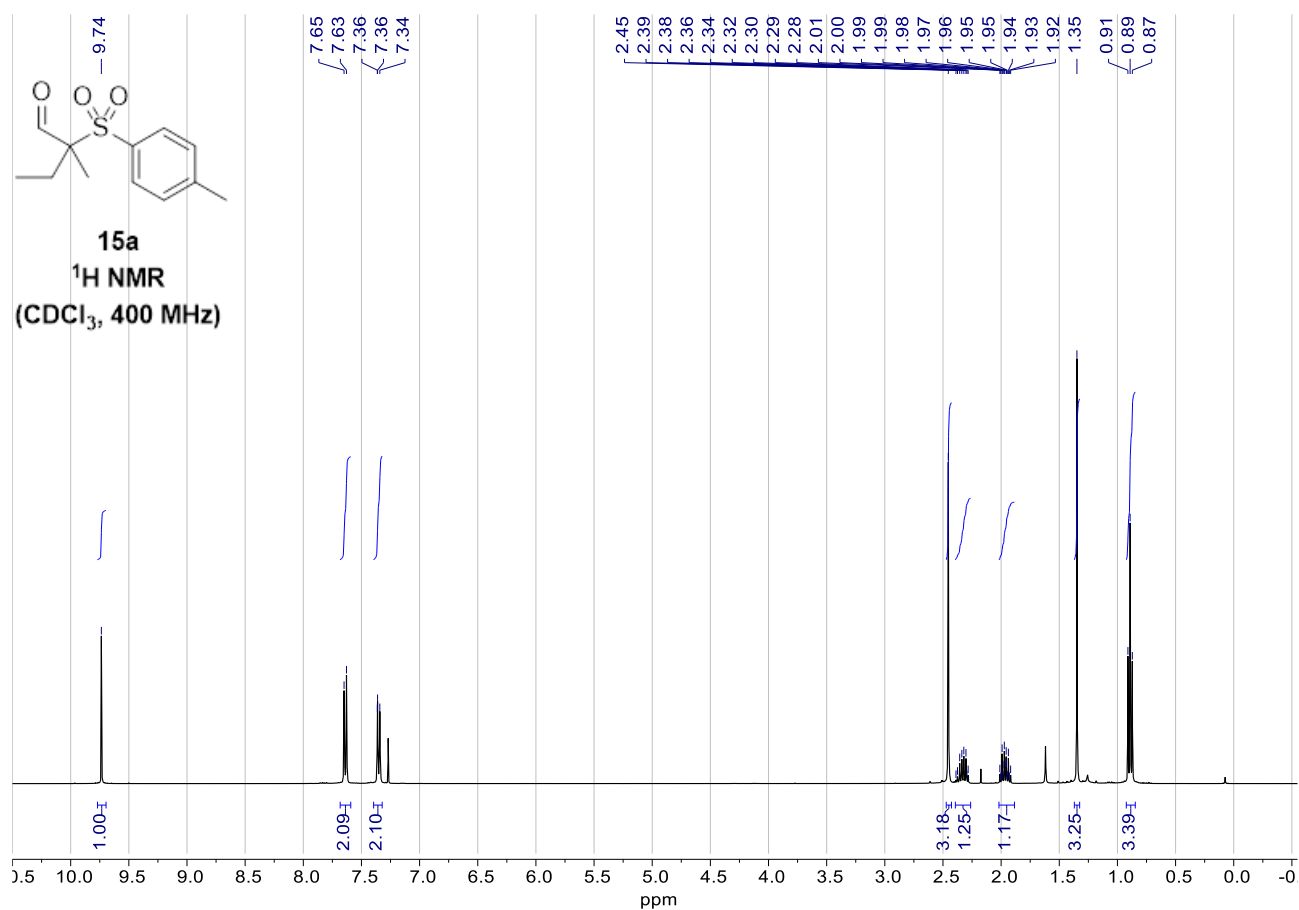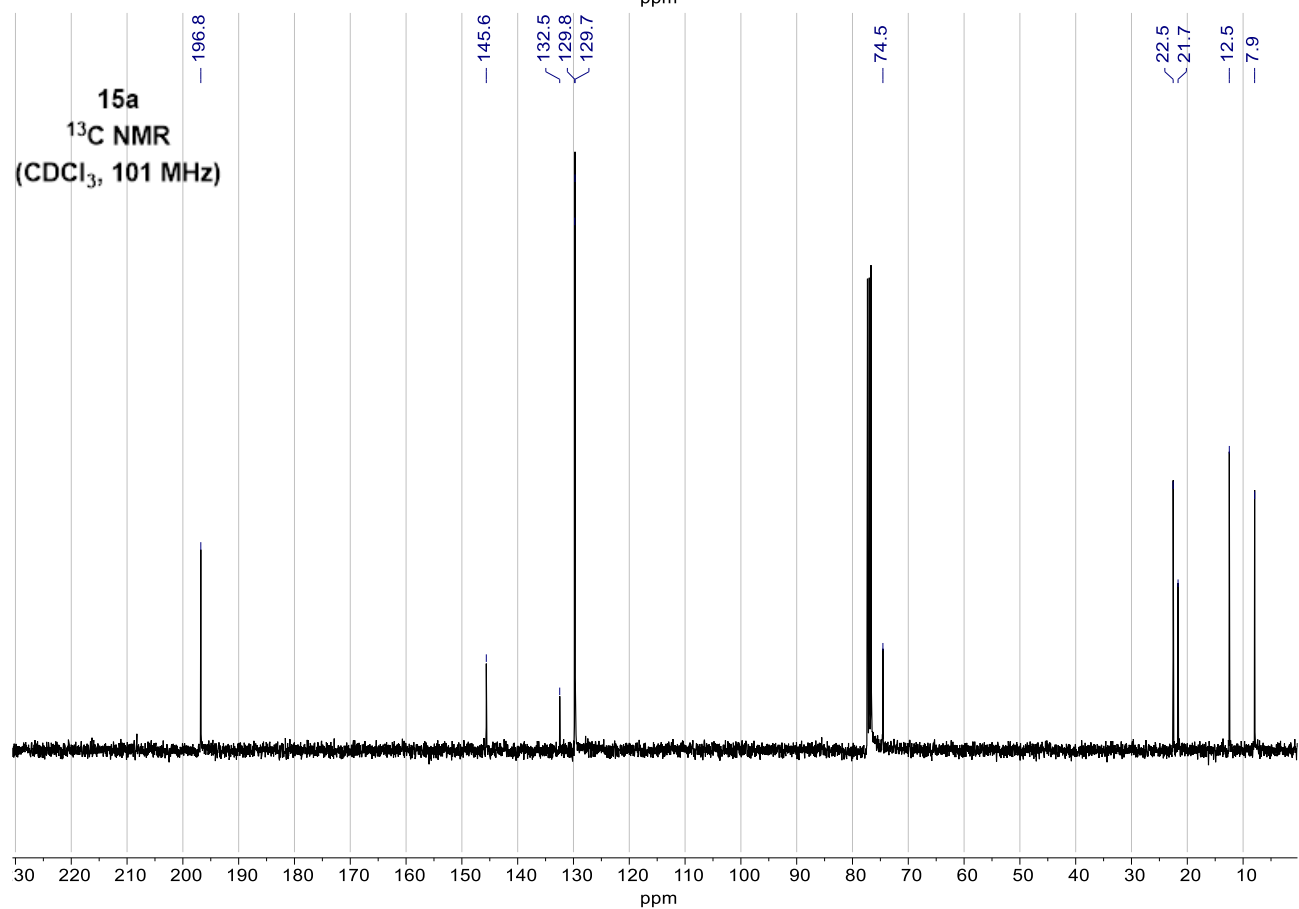

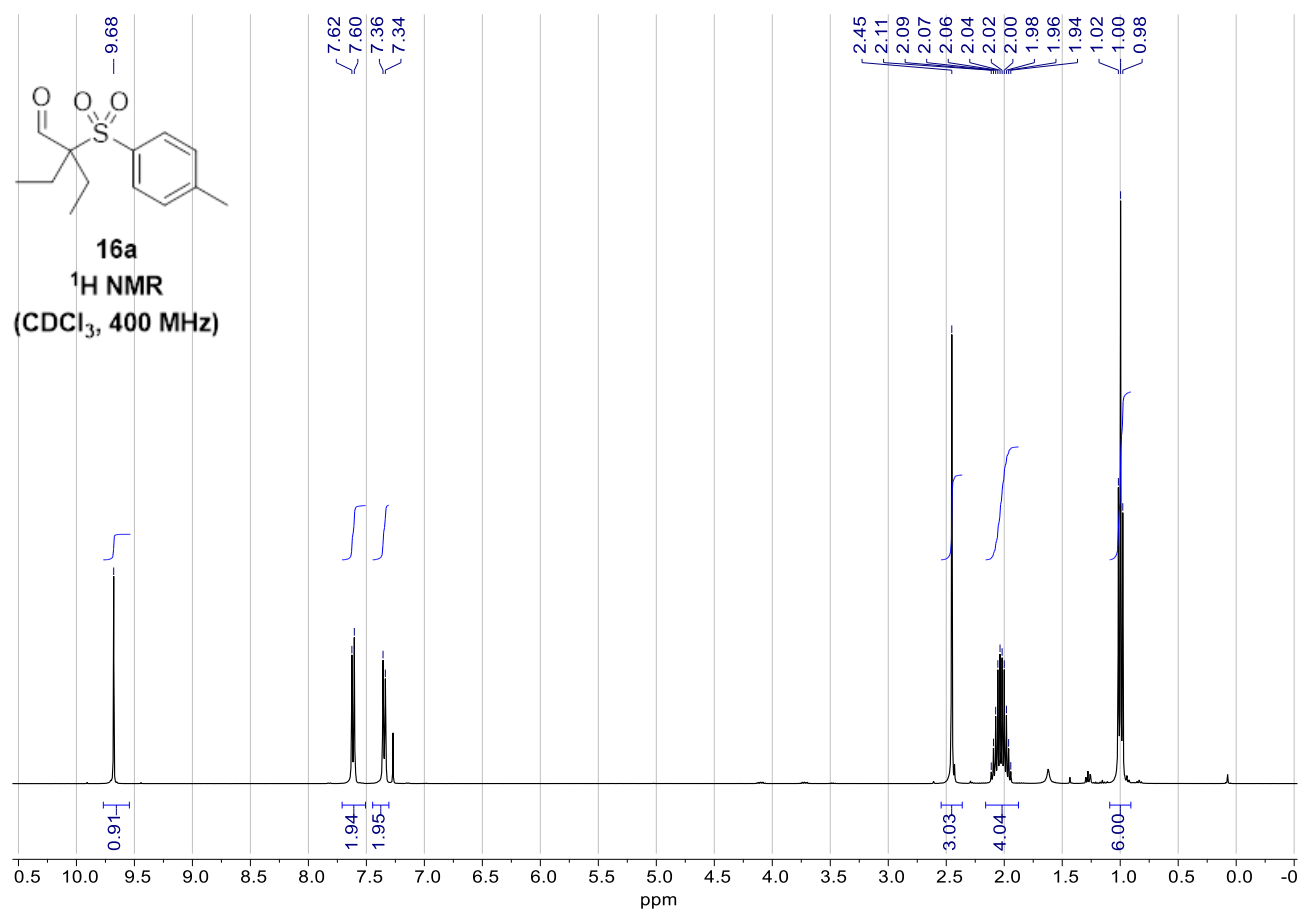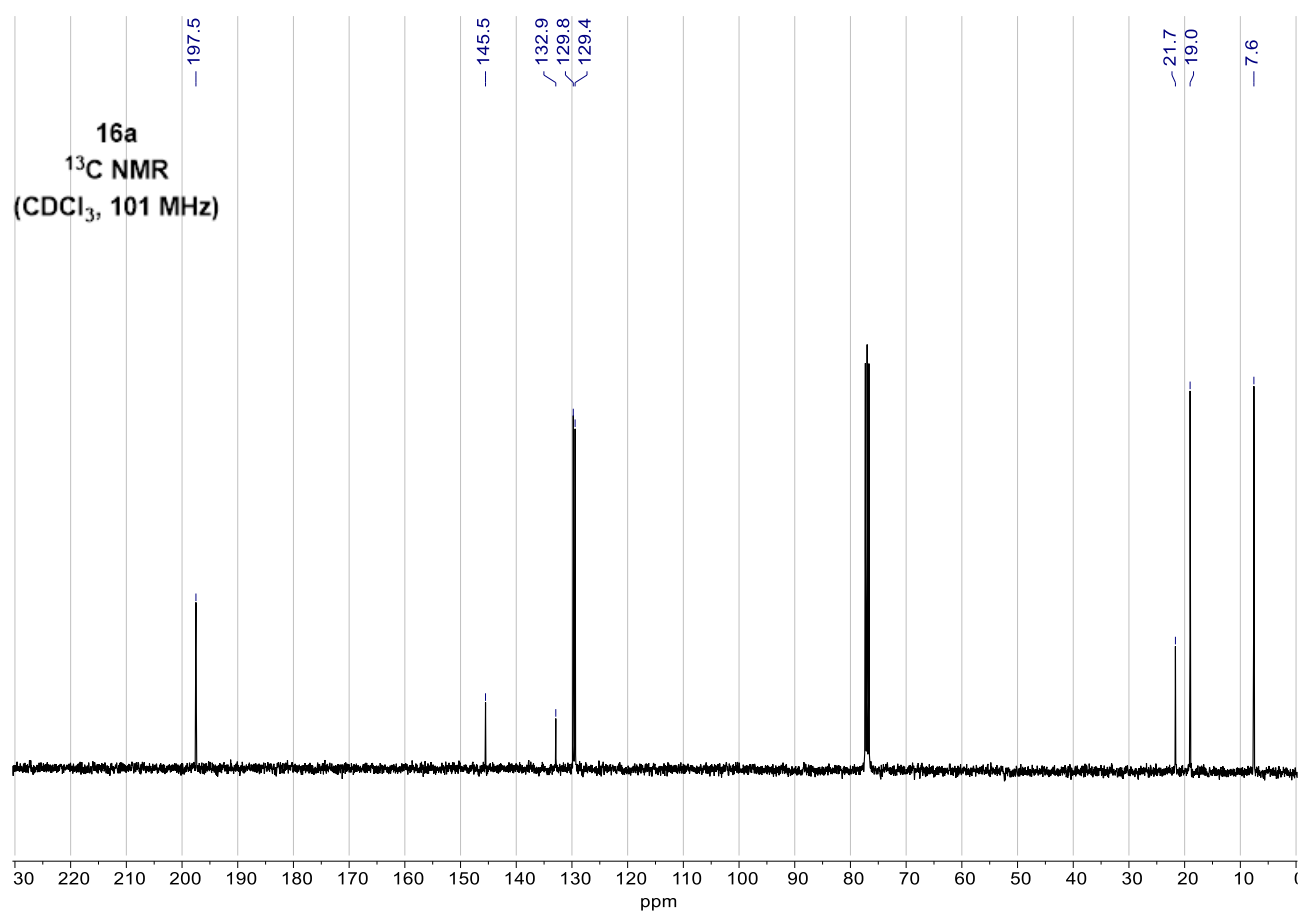

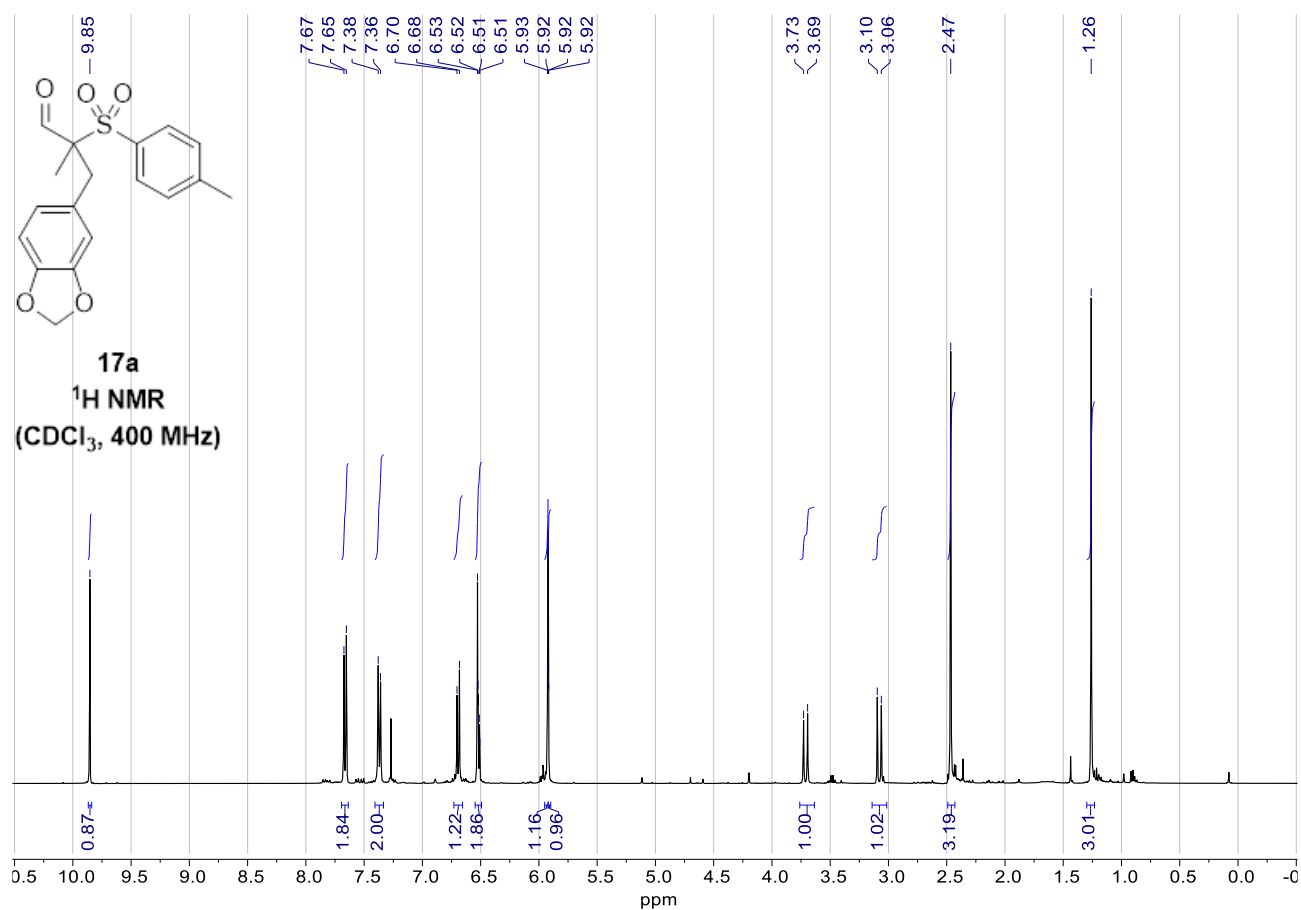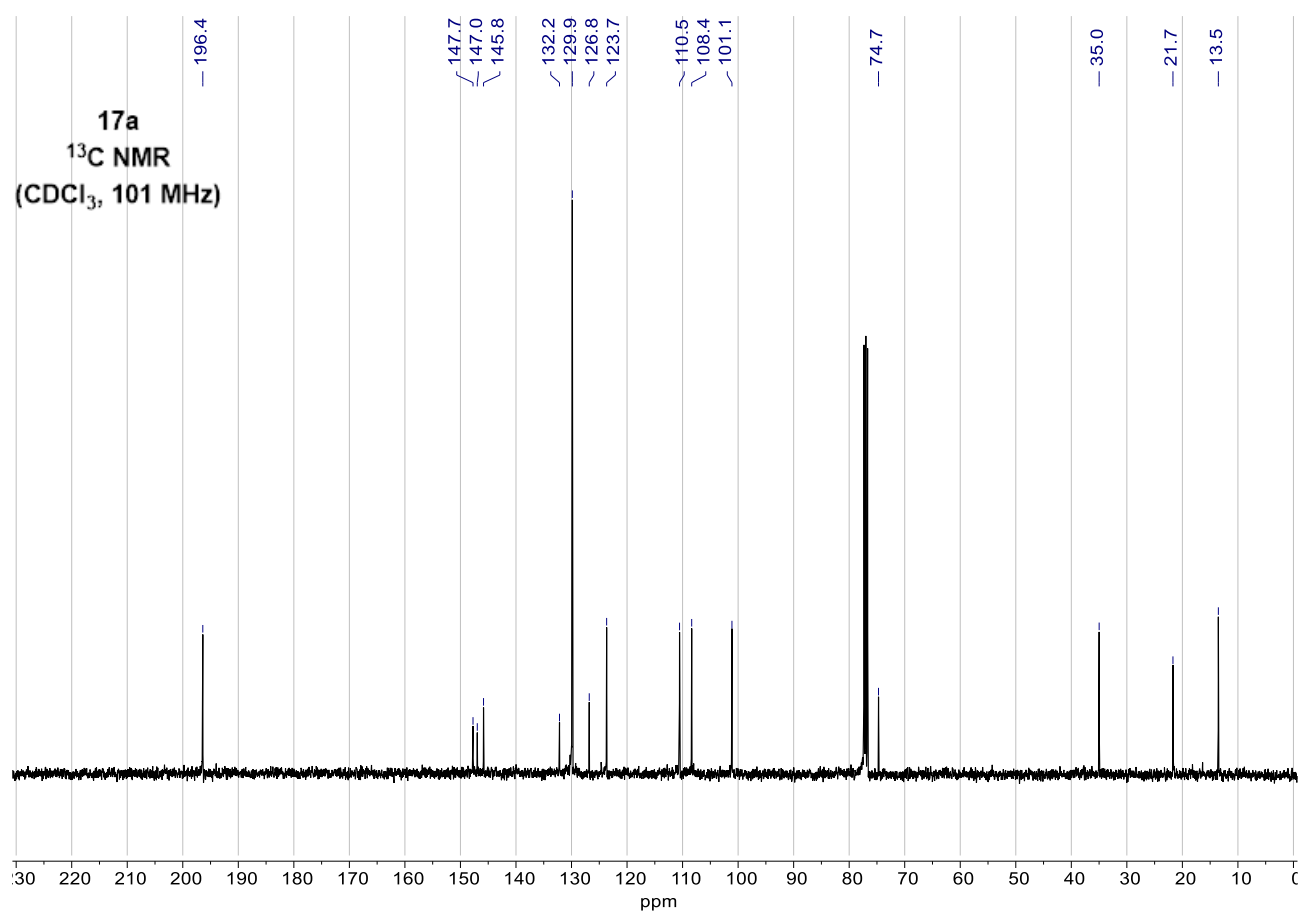

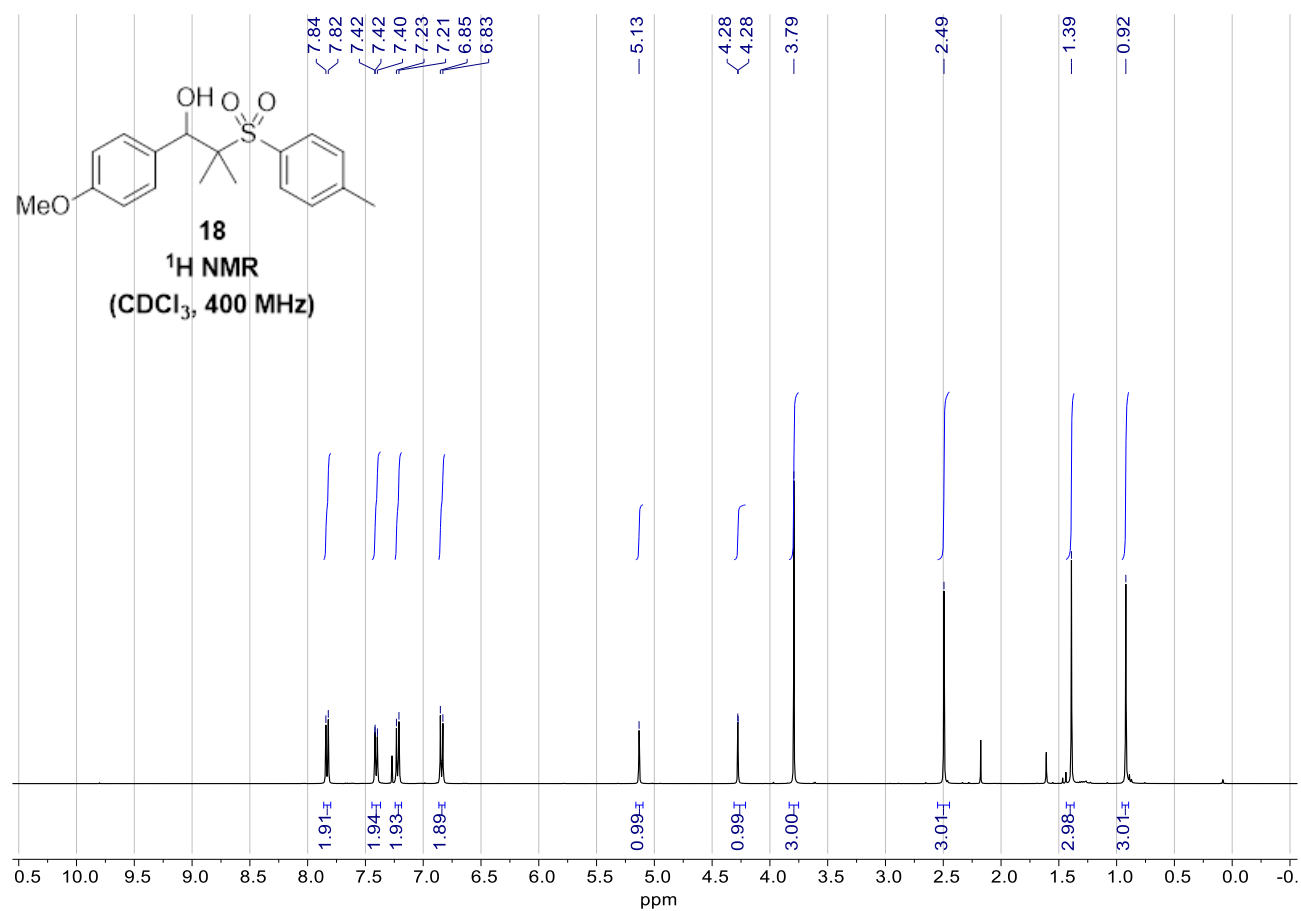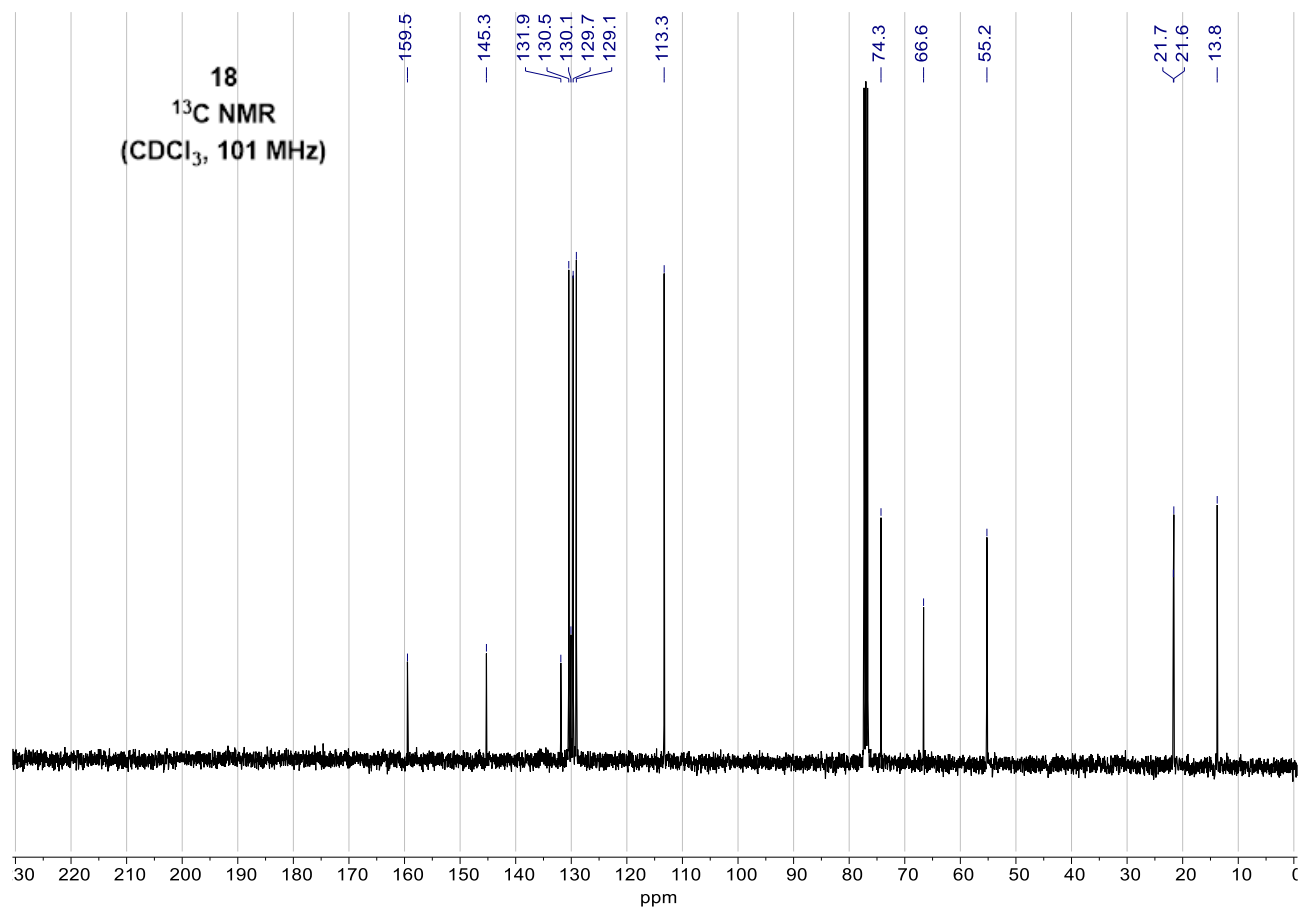

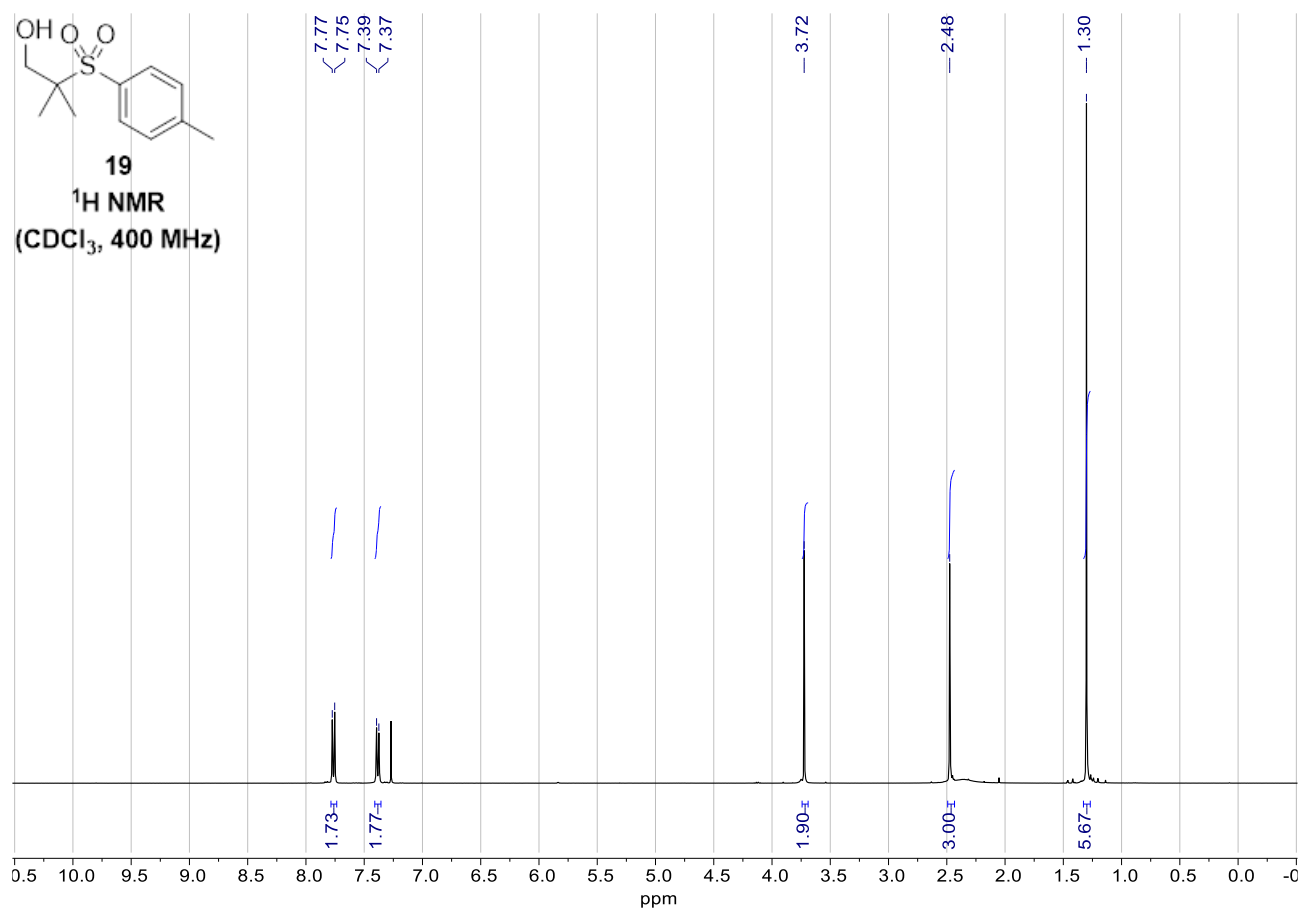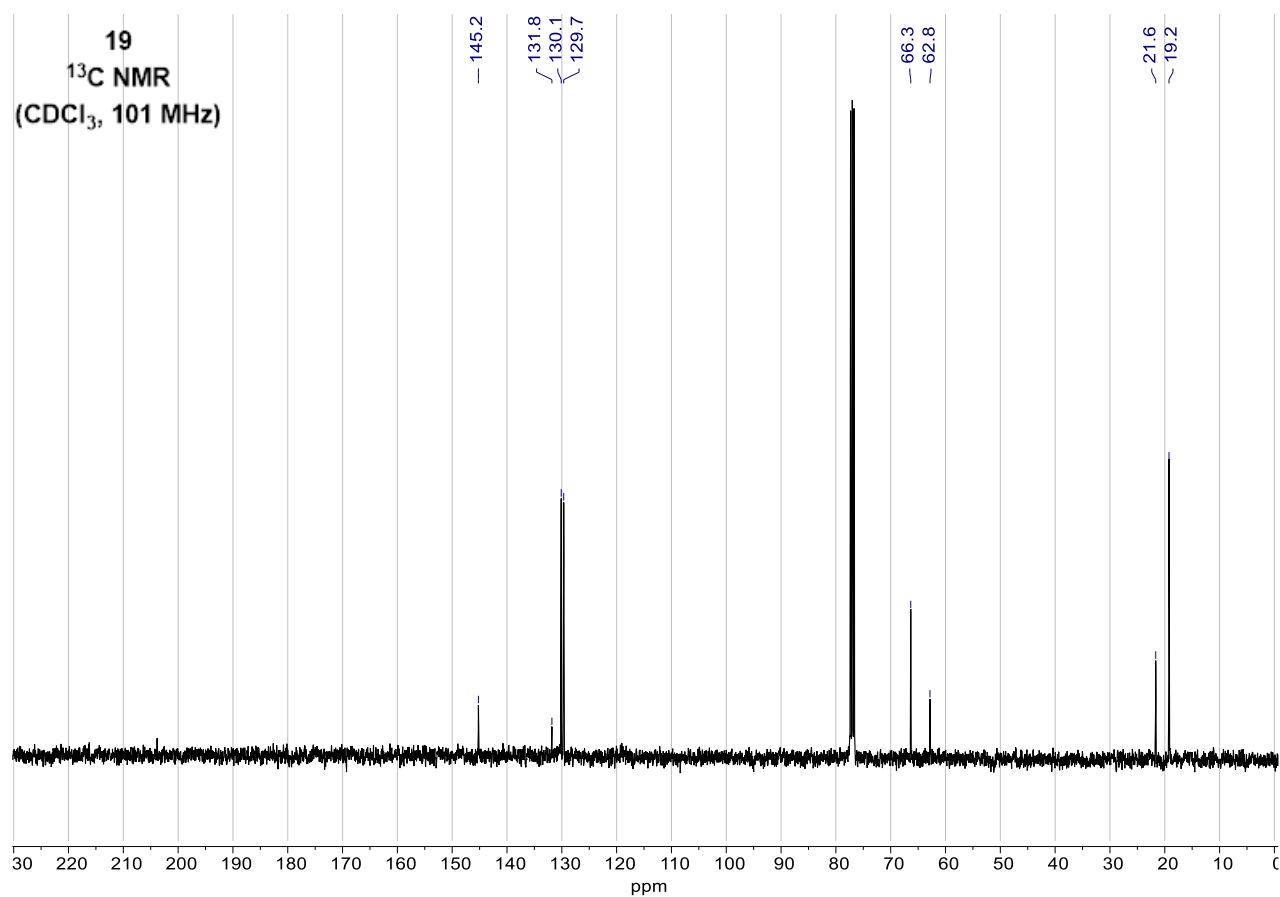

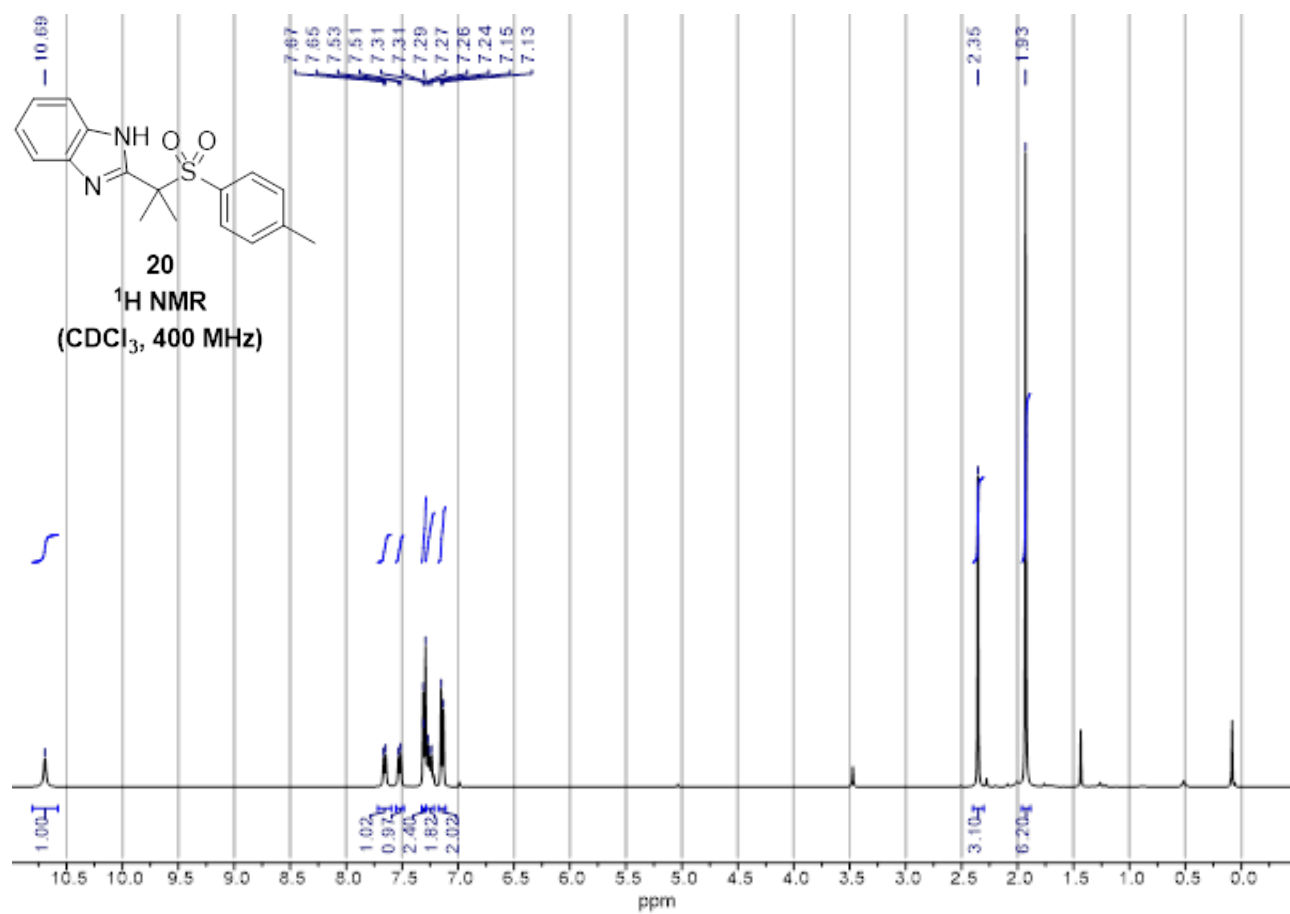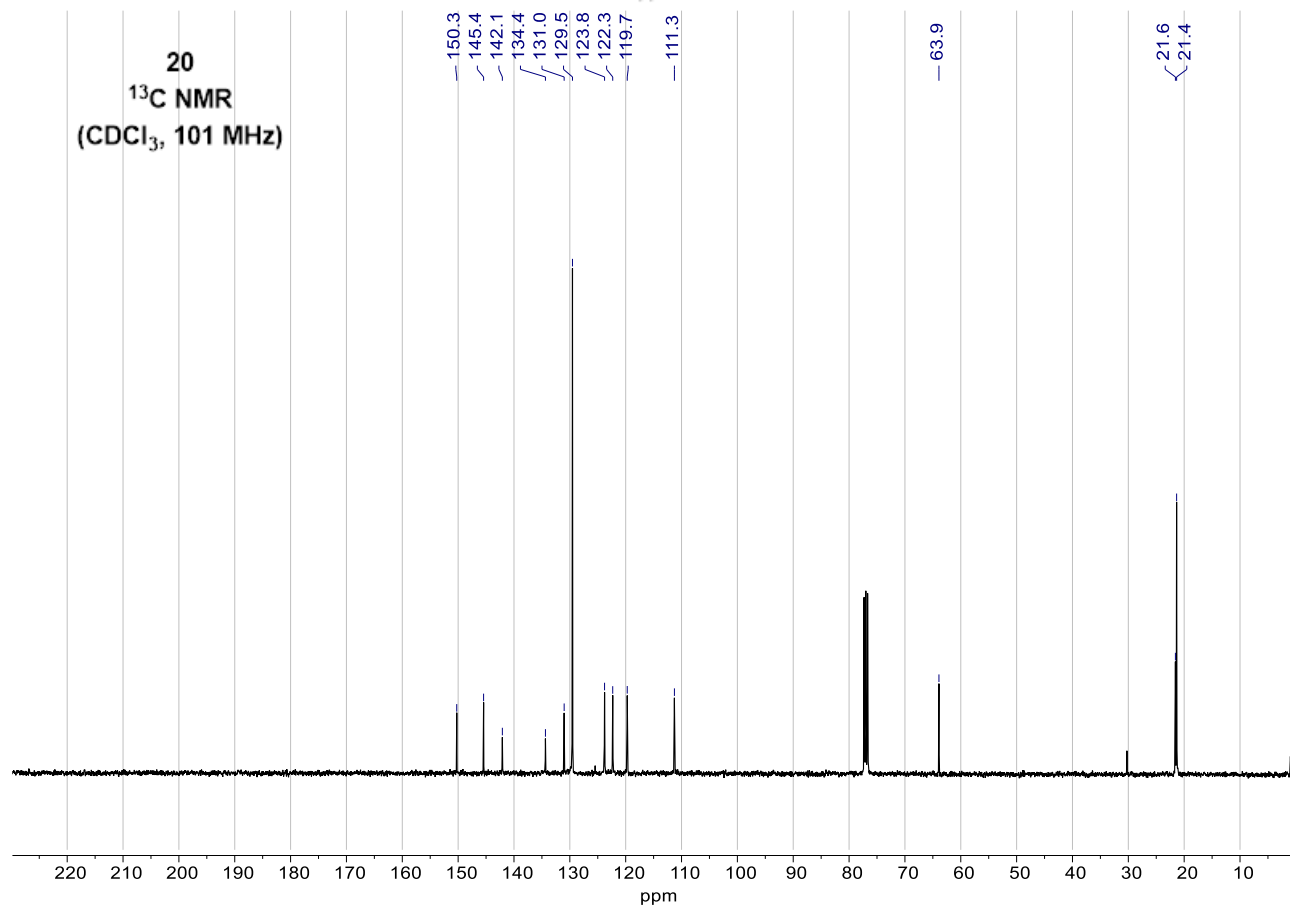

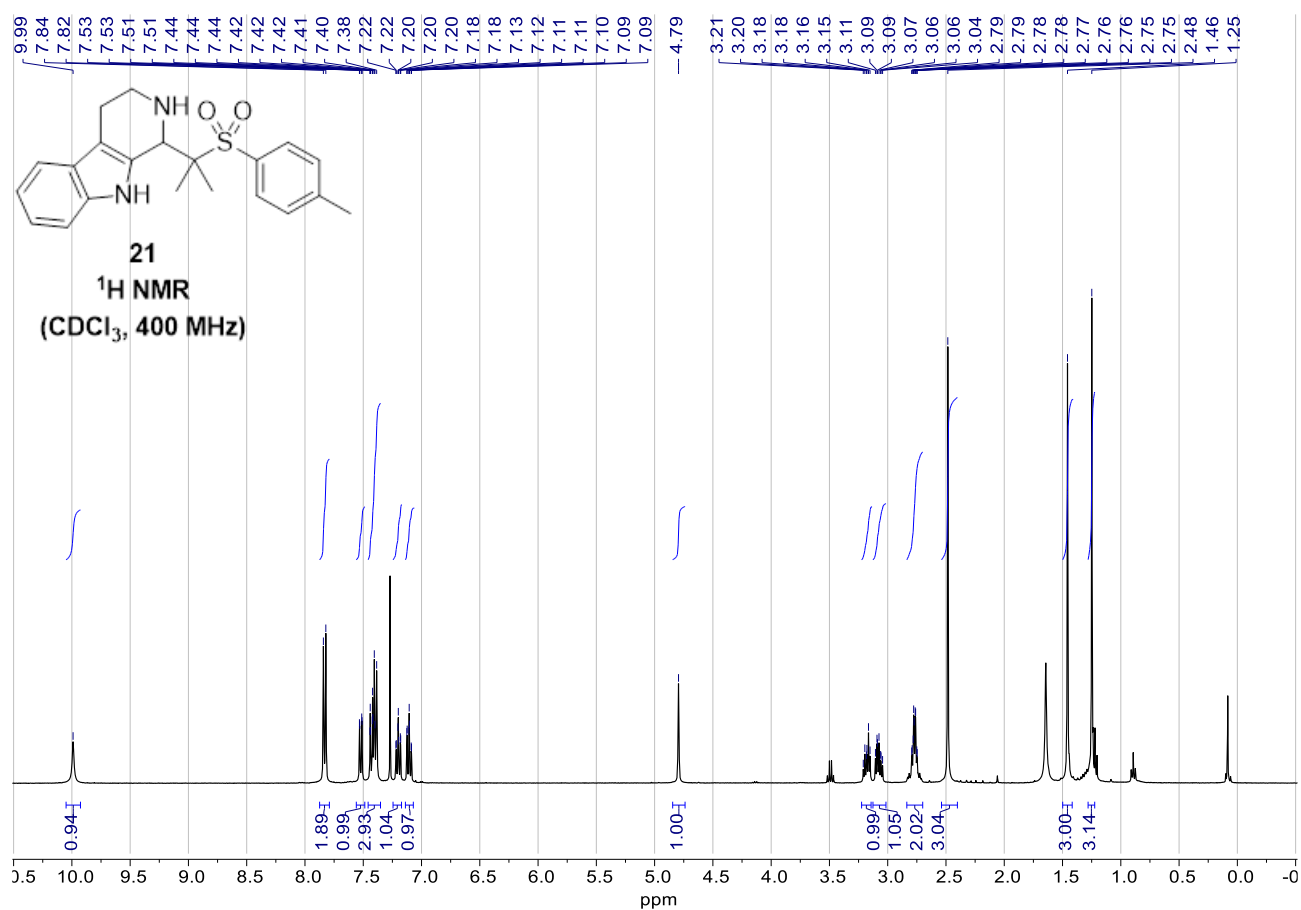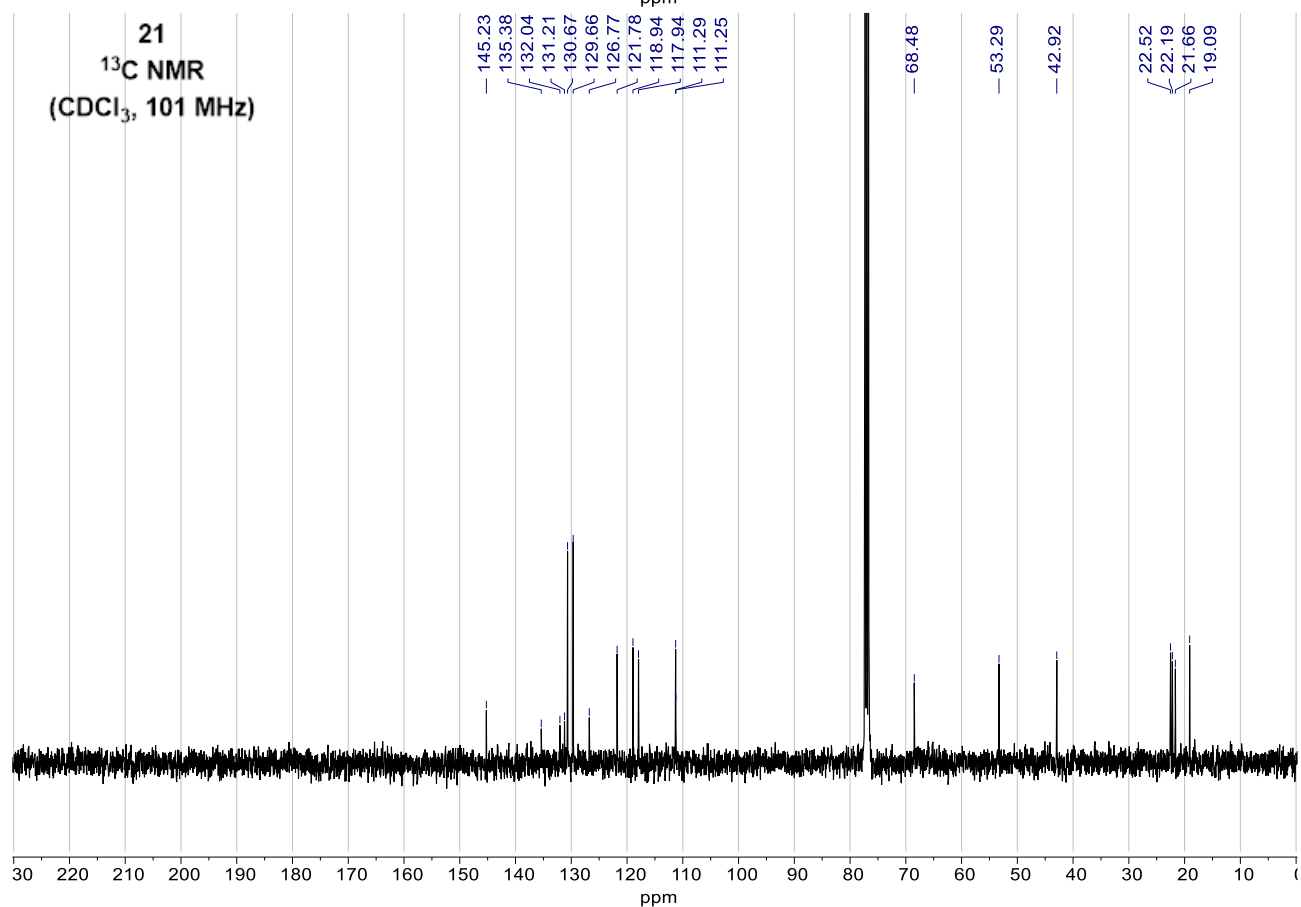



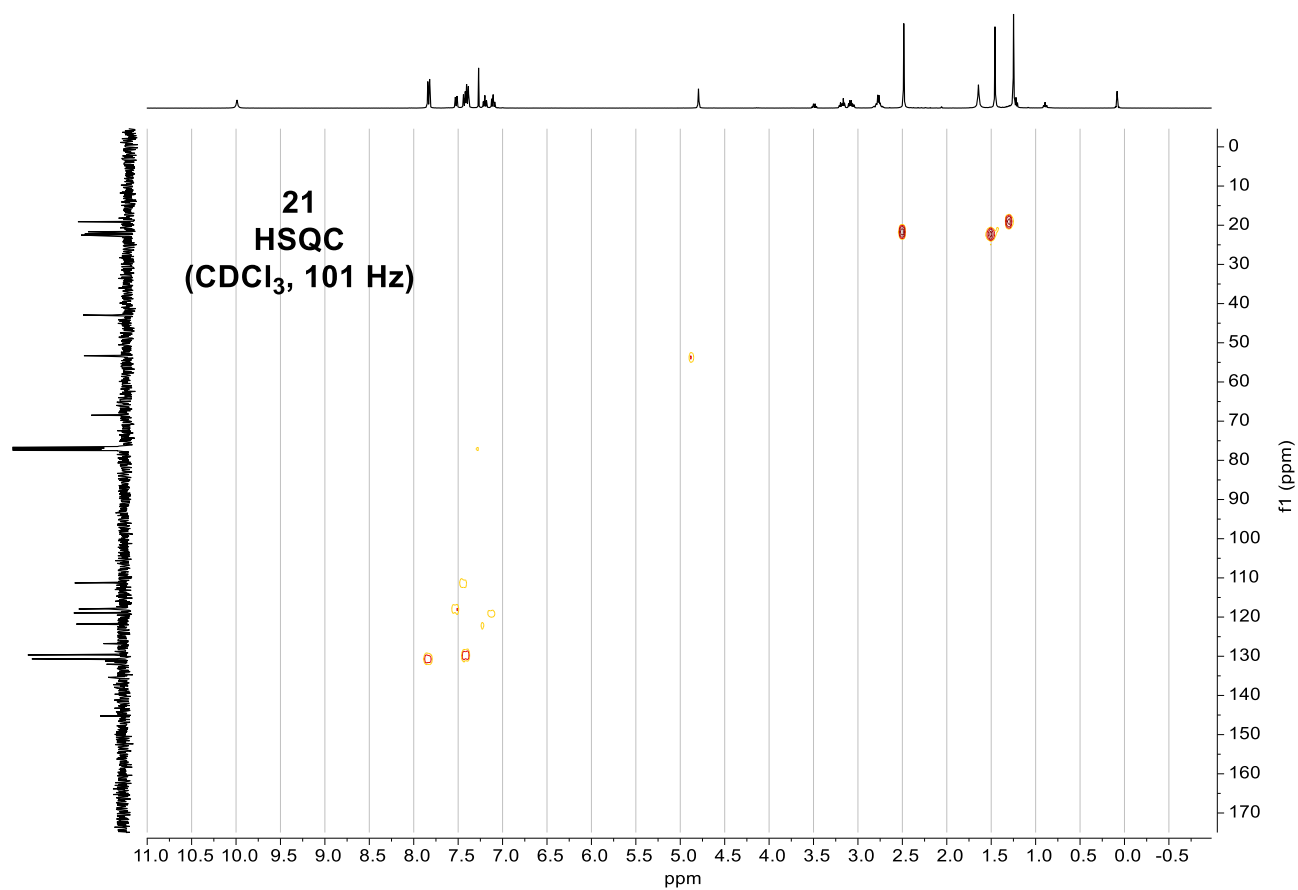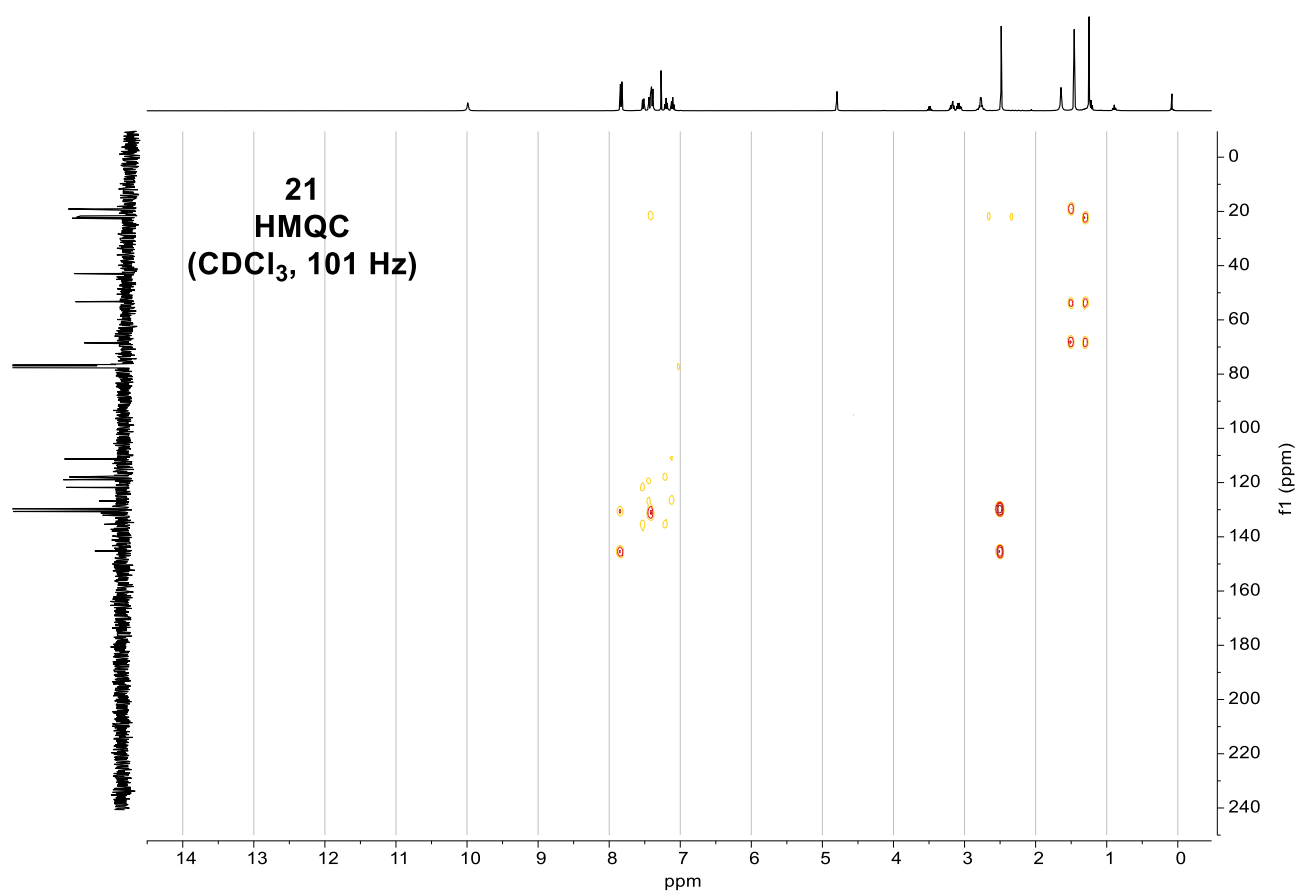

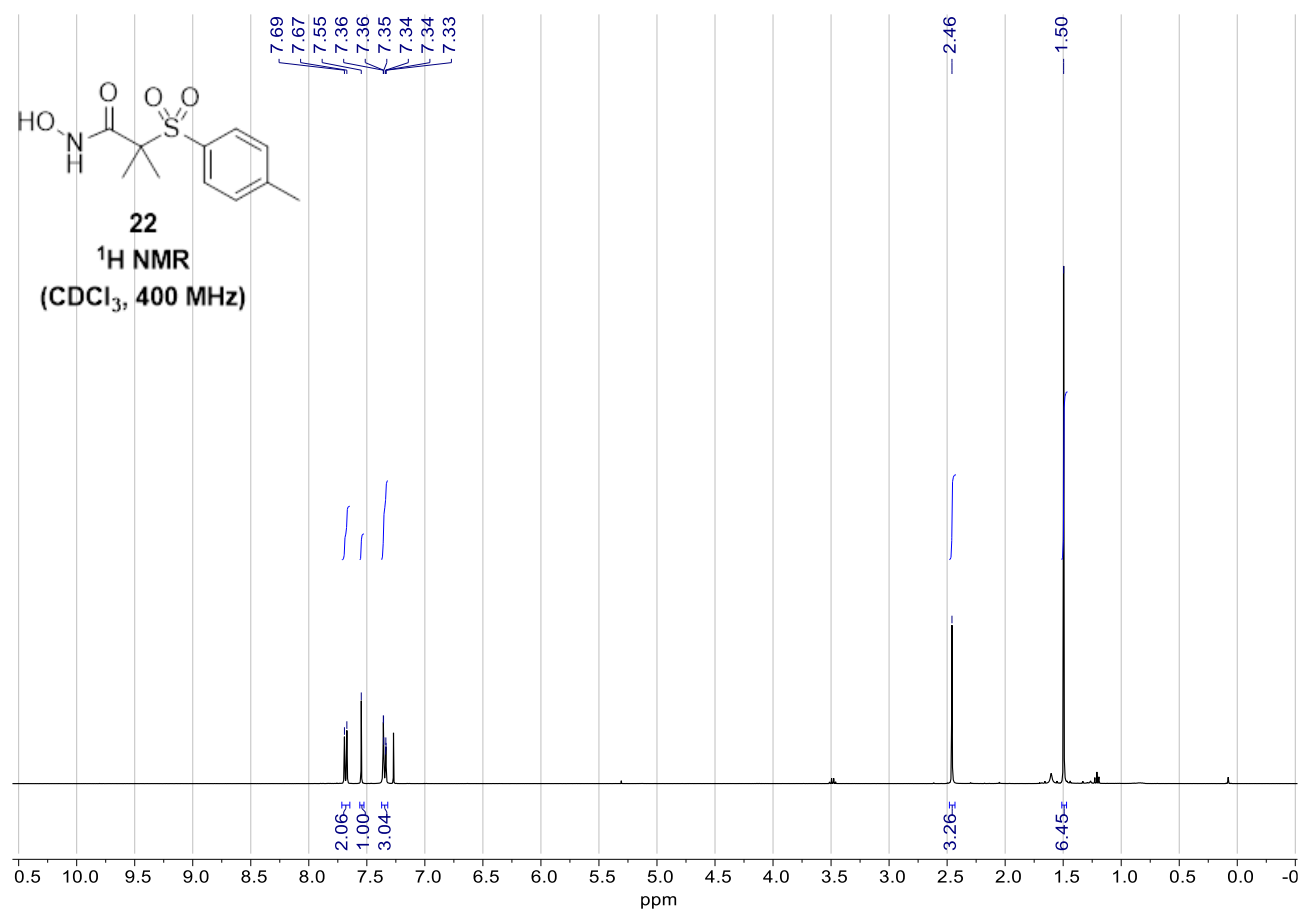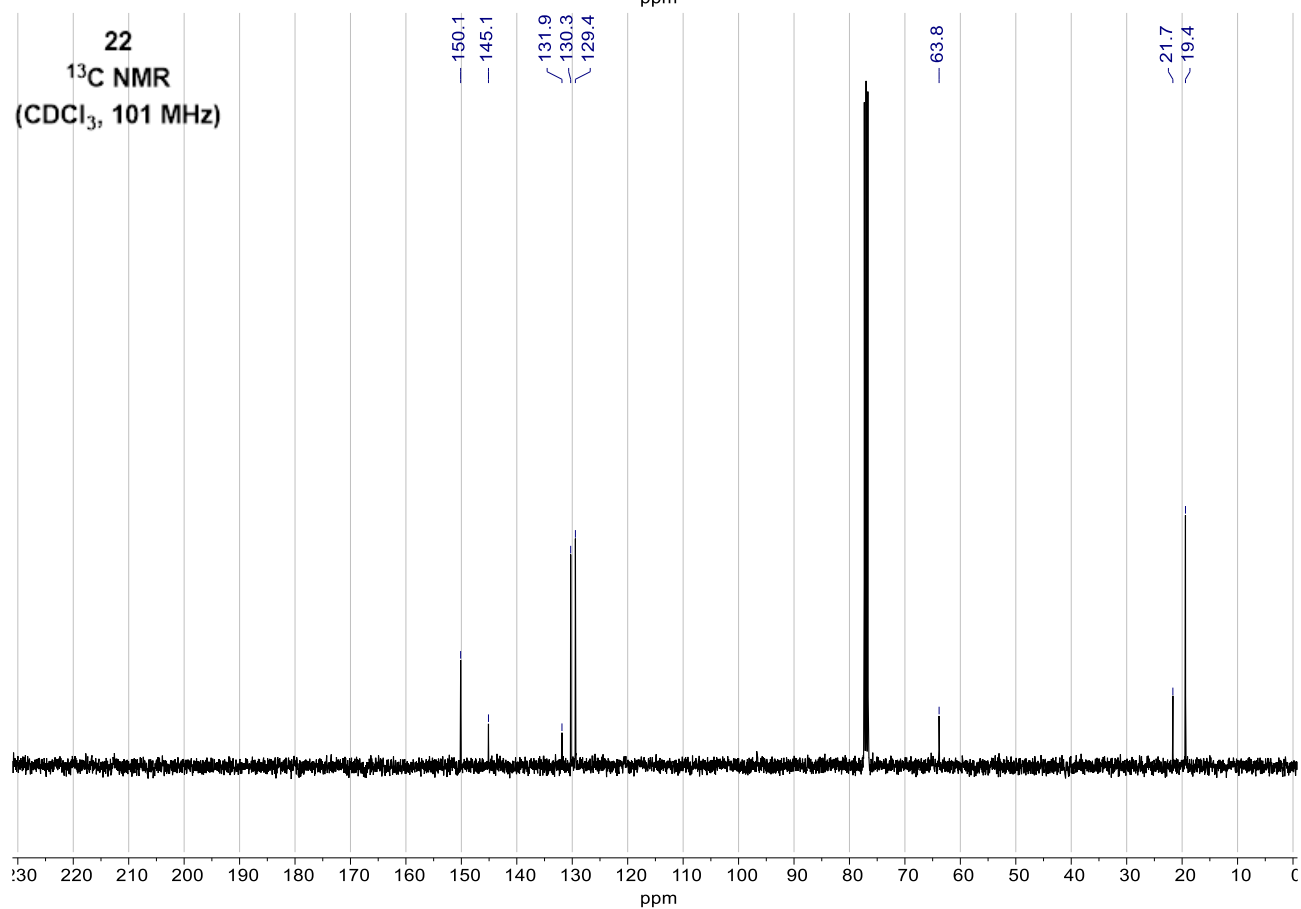

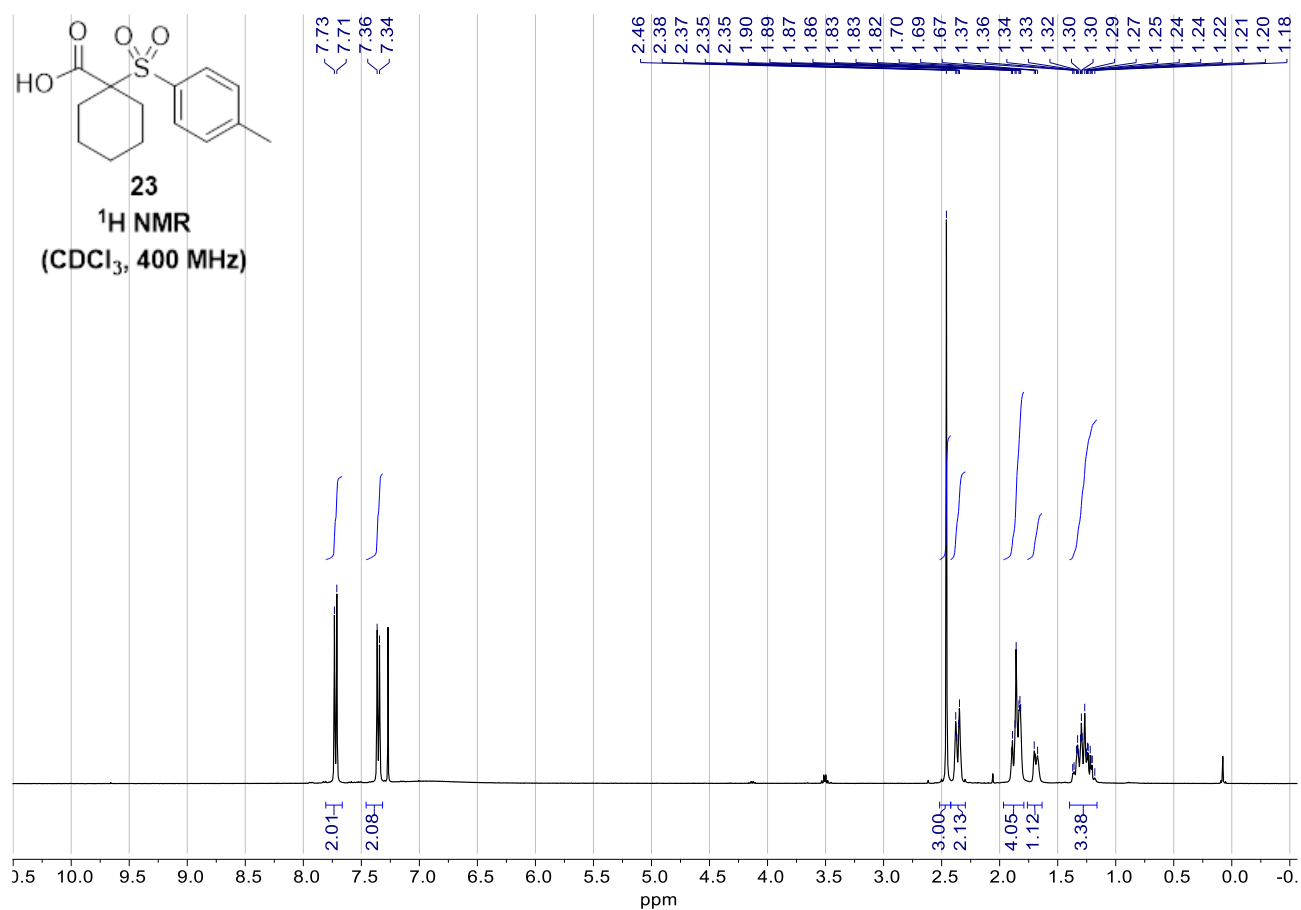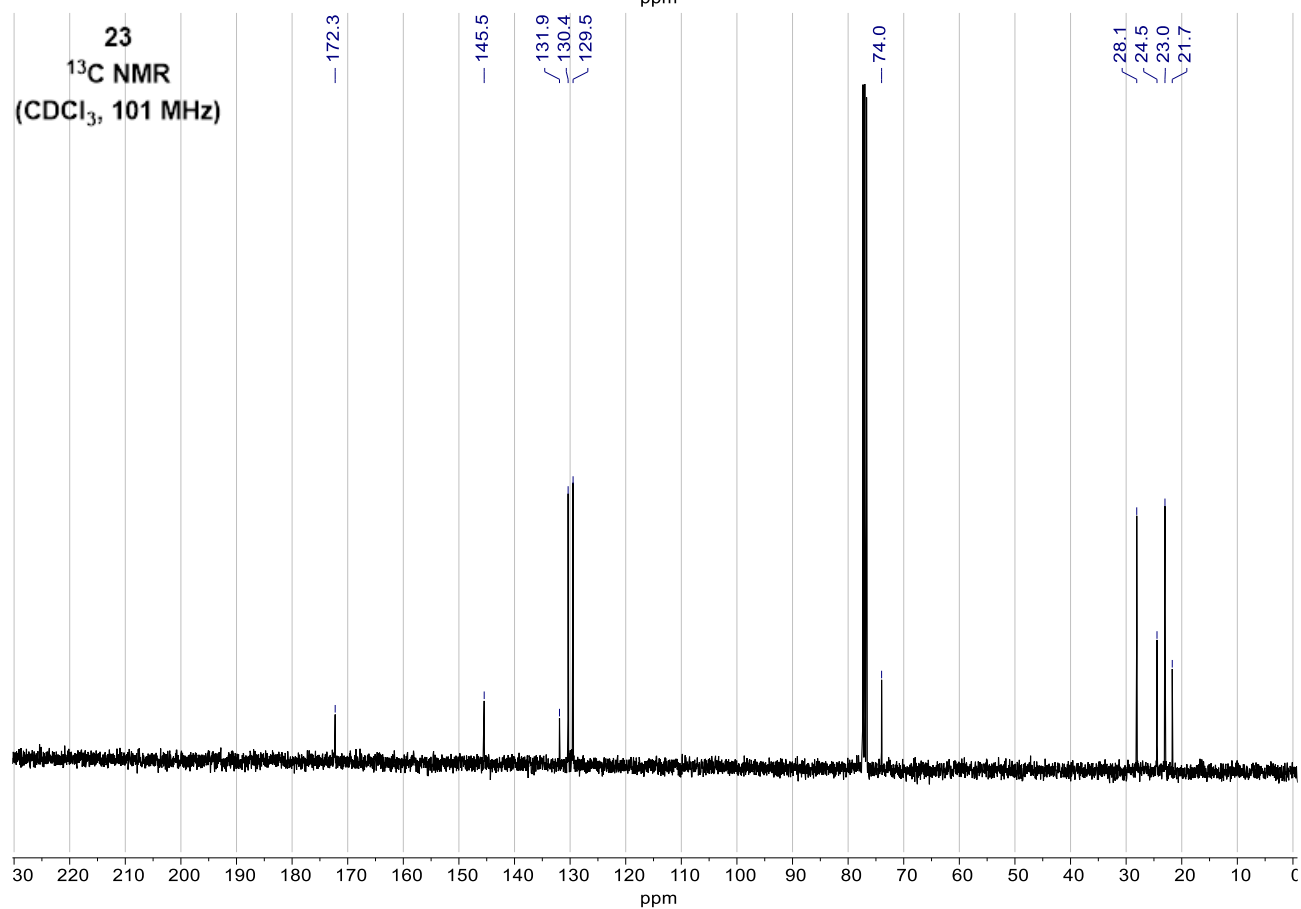

## References

- 1 a) O. V. Boytsova, T. O. Shekunova and A. E. Baranchikov, *Russ. J. Inorg. Chem.*, 2015, **60**, 546–551. b) J. Hem, *US Geol. Surv. water-supply Pap.* 1667-A, 1963, 71.
- 2 B. Skillinghaug, J. Rydfjord and L. R. Odell, *Tetrahedron Lett.*, 2016, **57**, 533–536.
- 3 G. Bogonda, Di. V. Patil, H. Y. Kim and K. Oh, *Org. Lett.*, 2019, **21**, 3774–3779.
- 4 Y. Bin and R. Hua, *Molecules*, 2016, **22**, 39.
- 5 A. U. Meyer, K. Straková, T. Slanina and B. König, *Chem. Eur. J.*, 2016, **22**, 8694–8699.
- 6 S. St John-Campbell, A. J. P. White and J. A. Bull, *Org. Lett.*, 2020, 10.1021/acs.orglett.0c00124.
- 7 Munnuri, S.; Adebesein, A. M.; Paudyal, M. P.; Yousufuddin, M.; Dalipe, A.; Falck, J. R, *J. Am. Chem. Soc.* 2017, **139**, 18288–18294
- 8 G. A. DiLabio, K. U. Ingold, M. D. Roydhouse and J. C. Walton, *Org. Lett.*, 2004, **6**, 4319–4322.
- 9 Bahrami, M. M. Khodaei and F. Naali, *J. Org. Chem.*, 2008, **73**, 6835–6837.
- 10 Z. Zhao, Y. Sun, L. Wang, X. Chen, Y. Sun, L. Lin, Y. Tang, F. Li and D. Chen, *Tetrahedron Lett.*, 2019, **60**, 800–804.
- 11 G. Dettori, S. Gaspa, A. Porcheddu and L. De Luca, *Adv. Synth. Catal.*, 2014, **356**, 2709–2713.
- 13 E. Dalcanale and F. Montanari, *J. Org. Chem.*, 1986, **51**, 567–569.
